# Supplementary material for: Surface microbiota of Mediterranean loggerhead sea turtles unraveled by 16S and 18S amplicon sequencing
Source: Frontiers journal article supplement (doi:10.3389/fevo.2022.907368), 2022-07-29
Supplement: Table_1.xlsx [file Table_1.xlsx]

## Sheet: metadata
SampleID	MiseqRun	TurtleID	TurtleName	TurtleState	TurtleSex	TurtleAge	CCL	BodySite	SamplingLocality	OriginSea	SamplingMonth	Season	SamplingYear
#q2:types	categorical	categorical	categorical	categorical	categorical	categorical	numeric	categorical	categorical	categorical	categorical	categorical	categorical
GTB11	first	ID035	GTB1	Wild	NA	NA	78.6	Carapace	Amvrakikos-GR	Ionian	August	Warm	2018
GTB12	first	ID035	GTB1	Wild	NA	NA	78.6	Skin	Amvrakikos-GR	Ionian	August	Warm	2018
GTB21	first	ID036	GTB2	Wild	NA	NA	51	Carapace	Amvrakikos-GR	Ionian	August	Warm	2018
GTB22	first	ID036	GTB2	Wild	NA	NA	51	Skin	Amvrakikos-GR	Ionian	August	Warm	2018
GTB31	first	ID037	GTB3	Wild	NA	NA	69.6	Carapace	Amvrakikos-GR	Ionian	August	Warm	2018
GTB32	first	ID037	GTB3	Wild	NA	NA	69.6	Skin	Amvrakikos-GR	Ionian	August	Warm	2018
GTB41	first	ID038	GTB4	Wild	NA	NA	58.5	Carapace	Amvrakikos-GR	Ionian	August	Warm	2018
GTB42	first	ID038	GTB4	Wild	NA	NA	58.5	Skin	Amvrakikos-GR	Ionian	August	Warm	2018
GTB51	first	ID039	GTB5	Wild	NA	NA	53.2	Carapace	Amvrakikos-GR	Ionian	August	Warm	2018
GTB52	first	ID039	GTB5	Wild	NA	NA	53.2	Skin	Amvrakikos-GR	Ionian	August	Warm	2018
TB31	first	ID010	Merry Fisher	Admitted	Female	NA		Carapace	Aq-Pula-HR	Adriatic	December	Cold	2018
TB32	first	ID010	Merry Fisher	Admitted	Female	NA		Skin	Aq-Pula-HR	Adriatic	December	Cold	2018
TB49	first	ID019	Tarcontes	Wild	NA	Juvenile	50.7	Carapace	Bari-W-IT	Adriatic	January	Cold	2019
TB50	first	ID019	Tarcontes	Wild	NA	Juvenile	50.7	Skin	Bari-W-IT	Adriatic	January	Cold	2019
TB55	first	ID022	Reti	Wild	Male	Adult	72	Carapace	Bari-W-IT	Adriatic	January	Cold	2019
TB56	first	ID022	Reti	Wild	Male	Adult	72	Skin	Bari-W-IT	Adriatic	January	Cold	2019
TB73	first	ID028	Murrana	Wild	Female	Adult	74.5	Carapace	Bari-W-IT	Adriatic	January	Cold	2019
TB74	first	ID028	Murrana	Wild	Female	Adult	74.5	Skin	Bari-W-IT	Adriatic	January	Cold	2019
TB89	first	ID034	Iracus	Wild	Female	Adult	72	Carapace	Bari-W-IT	Adriatic	January	Cold	2019
TB90	first	ID034	Iracus	Wild	Female	Adult	72	Skin	Bari-W-IT	Adriatic	January	Cold	2019
TB115	second	ID047	Zal	Admitted	NA	NA	53.5	Carapace	Aq-Pula-HR	Adriatic	May	Warm	2019
TB116	second	ID047	Zal	Admitted	NA	NA	53.5	Skin	Aq-Pula-HR	Adriatic	May	Warm	2019
TB117	second	ID056	Samba	Admitted	Female	Adult	74	Carapace	Aq-Pula-HR	Adriatic	June	Warm	2019
TB118	second	ID056	Samba	Admitted	Female	Adult	74	Skin	Aq-Pula-HR	Adriatic	June	Warm	2019
TB119	second	ID057	Angelo	Admitted	Male	Adult	77	Carapace	Bari-H-IT	Tyrrhenian	June	Warm	2019
TB120	second	ID057	Angelo	Admitted	Male	Adult	77	Skin	Bari-H-IT	Tyrrhenian	June	Warm	2019
TB129	second	ID062	Zoki	Wild	Female	NA	54	Carapace	Losinj-HR	Adriatic	July	Warm	2019
TB130	second	ID062	Zoki	Wild	Female	NA	54	Skin	Losinj-HR	Adriatic	July	Warm	2019
TB131	second	ID063	CC_VIS_1901	Wild	NA	NA	24	Carapace	Vis-HR	Adriatic	June	Warm	2019
TB132	second	ID063	CC_VIS_1901	Wild	NA	NA	24	Skin	Vis-HR	Adriatic	June	Warm	2019
TB139	second	ID010	Merry Fisher	Wild	Female	NA	69.7	Carapace	Brijuni-pool-HR	Adriatic	October	Cold	2019
TB140	second	ID010	Merry Fisher	Wild	Female	NA	69.7	Skin	Brijuni-pool-HR	Adriatic	October	Cold	2019
TB145	second	ID068	Kanooh	Admitted	NA	Juvenile	46.5	Carapace	Bari-H-IT	Adriatic	July	Warm	2019
TB146	second	ID068	Kanooh	Admitted	NA	Juvenile	46.5	Skin	Bari-H-IT	Adriatic	July	Warm	2019
TB149	second	ID070	Futon	Admitted	NA	Juvenile	43	Carapace	Bari-H-IT	Adriatic	July	Warm	2019
TB150	second	ID070	Futon	Admitted	NA	Juvenile	43	Skin	Bari-H-IT	Adriatic	July	Warm	2019
TB151	second	ID071	Cosmyn	Wild	NA	Juvenile	65.2	Carapace	Bari-W-IT	Adriatic	October	Cold	2019
TB152	second	ID071	Cosmyn	Wild	NA	Juvenile	65.2	Skin	Bari-W-IT	Adriatic	October	Cold	2019
TB155	second	ID073	Marvin	Admitted	NA	Juvenile	32.2	Carapace	Aq-Pula-HR	Adriatic	November	Cold	2019
TB156	second	ID073	Marvin	Admitted	NA	Juvenile	32.2	Skin	Aq-Pula-HR	Adriatic	November	Cold	2019
TB157	second	ID074	Ryan	Admitted	NA	Juvenile		Carapace	Aq-Pula-HR	Adriatic	November	Cold	2019
TB158	second	ID074	Ryan	Admitted	NA	Juvenile		Skin	Aq-Pula-HR	Adriatic	November	Cold	2019
GTB61	second	ID075	AMV No1 GTB6	Wild	NA	NA	64.5	Carapace	Amvrakikos-GR	Ionian	July	Warm	2019
GTB62	second	ID075	AMV No1 GTB6	Wild	NA	NA	64.5	Skin	Amvrakikos-GR	Ionian	July	Warm	2019
GTB71	second	ID076	AMV No2 GTB7	Wild	NA	NA	62.9	Carapace	Amvrakikos-GR	Ionian	July	Warm	2019
GTB72	second	ID076	AMV No2 GTB7	Wild	NA	NA	62.9	Skin	Amvrakikos-GR	Ionian	July	Warm	2019
GTB91	second	ID078	AMV No4 GTB9	Wild	NA	NA	55.3	Carapace	Amvrakikos-GR	Ionian	July	Warm	2019
GTB92	second	ID078	AMV No4 GTB9	Wild	NA	NA	55.3	Skin	Amvrakikos-GR	Ionian	July	Warm	2019
GTB111	second	ID080	AMV No6 GTB11	Wild	NA	NA	66.5	Carapace	Amvrakikos-GR	Ionian	July	Warm	2019
GTB112	second	ID080	AMV No6 GTB11	Wild	NA	NA	66.5	Skin	Amvrakikos-GR	Ionian	July	Warm	2019
GTB121	second	ID081	RETH No1 GTB12	Wild	NA	NA		Carapace	Rethimno-GR	Aegean	July	Warm	2019
GTB122	second	ID081	RETH No1 GTB12	Wild	NA	NA		Skin	Rethimno-GR	Aegean	July	Warm	2019
GTB131	second	ID082	RETH No2 GTB13	Wild	NA	NA		Carapace	Rethimno-GR	Aegean	July	Warm	2019
GTB132	second	ID082	RETH No2 GTB13	Wild	NA	NA		Skin	Rethimno-GR	Aegean	July	Warm	2019
