# Supplementary material for: Surface microbiota of Mediterranean loggerhead sea turtles unraveled by 16S and 18S amplicon sequencing
Source: Frontiers journal article supplement (doi:10.3389/fevo.2022.907368), 2022-07-29
Supplement: Table_3.xlsx [file Table_3.xlsx]

## Sheet: Table S3 raw-data-18S
id	Sequence	Taxon	Confidence	GTB11	GTB12	GTB21	GTB22	GTB31	GTB32	GTB41	GTB42	GTB51	GTB52	TB31	TB32	TB49	TB50	TB55	TB56	TB73	TB74	TB89	TB90	GTB111	GTB112	GTB121	GTB122	GTB131	GTB132	GTB61	GTB62	GTB71	GTB72	GTB91	GTB92	TB115	TB116	TB117	TB118	TB119	TB120	TB129	TB130	TB131	TB132	TB139	TB140	TB145	TB146
#q2:types	categorical	categorical	categorical	numeric	numeric	numeric	numeric	numeric	numeric	numeric	numeric	numeric	numeric	numeric	numeric	numeric	numeric	numeric	numeric	numeric	numeric	numeric	numeric	numeric	numeric	numeric	numeric	numeric	numeric	numeric	numeric	numeric	numeric	numeric	numeric	numeric	numeric	numeric	numeric	numeric	numeric	numeric	numeric	numeric	numeric	numeric	numeric	numeric	numeric
00023155d8f1e9face307ae272b16f62	AGCTCCAATAGCGTATATTAAAGTTGTTGCAGTTAAAAAGCTCGTAGTTGGATTTCTGCGAGGGTGCCAATGTCCGCCGACGCGCGTGCGCAGCGGCGCCCTCGCATCCTTCTGTTACCACCTCTCGGCATTCACTTGCCGGTGGTCGGCTCAGAGAATTTACCTTGAGAAAATTAGAGTGTTTCAGGCAGGCTAGGCCGGAATACATTAGCATGGAATAATGGAATAGGACTACGGTCTCGTTGTTGGTTTGAGGGACTGCAGTAATGATTAATAGGGATAGTTGGGGGCATTAGTATTTAATTGTCAGAGGTGAAATTCTCGGATTTGTTAAAGACTAACTTATGCGAAAGCATTTGCCAAGGATGTTT	Eukaryota;Alveolata;Ciliophora;Spirotrichea;Strombidiida;Tontoniidae_B;Pseudotontonia;Pseudotontonia_simplicidens;	0.964227	0	0	0	0	0	0	0	0	0	0	0	0	0	0	0	0	0	0	0	0	0	0	0	0	0	0	0	0	0	0	0	0	0	0	0	0	0	0	0	0	0	0	0	0	0	0
0006549785a8aa0a7b9de58a8a1789d6	AGCTCCAGAAGCGTATGCTAACGTTGTTGCAGTTAAAAAGCTCGTAGTTGAAGGTTTGTCGGTTGGGTCTGTGGGGTGAATGCTCTGTAGATCGGCCTTTTTTTTTCTTGGCTCTCTCTTTGAGGGGGCCTCGTTCACTGTAAACAAATTGGAGTGCTCCACGCAGGTCGTTGGGACCTGGACAATTGTTATGGGATGATGAGATAGGGCTCGGGCACTATTTTGTCGGTTTGCATGCCTGGGTAATGGTGAATAGGAACAGTTGGGGATATTCGTATTTAGCGGTCAGAGGTGAAATTCTTGGATTCGGGAAAGACGAACAACTGCGAAGGCATTTATCAAAGATGTTT	Eukaryota;Stramenopiles;Sagenista;Labyrinthulomycetes;Thraustochytriales;Thraustochytriaceae;Thraustochytriaceae_X;Thraustochytriaceae_X_sp.;	0.919608	0	0	0	0	0	0	0	0	0	0	0	0	0	0	0	0	0	0	0	0	0	0	0	0	0	0	0	0	0	0	0	100	0	0	0	0	0	0	0	0	0	0	0	0	0	0
001027821fd0edca3c5ede8d7a2bb31e	AGCTCCAAAAGCGTATATTAAAGTTGTTGCAGTTAAAAAGCTCGTAGTTGGATTTCTGGTAGGAGCGACCATGCCGGGCTTGATTGTCCGTGTTTTGTGTTGTCTCCAGCCATCCTCGTGGAGAGCGTTTCTGGCATTAGTTTGTTGGAGGCGGGACCCGCGTCTTTCACTGTGAAAAAATTAGAGTGTTTAAAGCAGGCAATTGGCTTGAATACATTAGCATGGAATGATAAGATAGGACTTTGGTGCTATTTTGTTGGTTTGCACATCAAGGTAATGATTAACAGAATCAGTCGGGGATATTCGTATGCAAATGTCAGAGGTGAAATTCTTGGATTTTTTACAGACGAACTACTGCGAAAGCATTTATCAAGGATGTTT	Eukaryota;Stramenopiles;Sagenista;Labyrinthulomycetes;Labyrinthulales;Labyrinthulaceae;Labyrinthulaceae_X;Labyrinthulaceae_X_sp.;	0.998107	0	0	0	0	0	0	0	0	0	0	0	0	0	0	0	0	0	0	0	0	0	0	0	0	0	0	0	0	0	0	0	0	29	0	0	0	0	0	0	0	0	0	0	0	0	0
002bd9f6c4a6db487cb1983e5f54db08	AGCTCCAATAGCGTATATTAAAGTTGTTGCGGTTAAAAAGCTCGTAGTTGGATTTCTGCTGAGGACGACCGGTCCGCCCTCTGGGTGAGTATCTGGCTCGGCCTGGGCATCTTCTTGGAGAACGTAGCTGCACTTGACTGTGTGGTGCGGTATCCAGGACTTTTACTTTGAGGAAATTAGAGTGTTTCAAGCAGGCACACGCCTTGAATACATTAGCATGGAATAATAAGATAGGACCTCGGTTCTATTTTGTTGGTTTCTAGAGCTGAGGTAATGATTAATAGGGATAGTTGGGGGCATTCGTATTTAACTGTCAGAGGTGAAATTCTTGGATTTGTTAAAGACGGACTACTGCGAAAGCATTTGCCAAGGATGTTT	Eukaryota;Alveolata;Dinoflagellata;Dinophyceae	1	0	0	0	0	0	0	0	0	0	0	0	0	0	0	0	0	0	24	0	0	0	0	0	0	0	0	0	0	0	0	0	0	0	0	0	0	0	0	0	0	0	0	0	0	0	0
002e5235f8481b0bac26f9bebc553af7	AGCTCCAATAGCGTATATTAAAGTTGTTGCAGTTAAAAAGCTCGTAGTTGAAGATTTGGGTTGGTACACTAGACCAAAGGTCCGGTGCCCTGGCCCGTTTATCGCAAAGACGCCTTGCCGTATTAATTTATGGCTTGGTCGAGTTGCGTCGTTTACTGTGAACAAATTAGGGTGTTTAAAGCAGGCCTTCGTTTGAATACACTAGCATGGAATAATAAGATATGATCTCGGTTGTATTTTGTTGGTGACCACCGAGGTAATGATTGAAAGAAACAGTTGTGGGTATTCGTATGAGCATGTCAGAGGTGAAATTCTTGGATTTTGATCAGACGAACTACTGCGAAAG	Eukaryota;Stramenopiles;Sagenista;Labyrinthulomycetes;Labyrinthulales;Labyrinthulaceae;Labyrinthula;Labyrinthula_sp.;	0.941769	0	0	0	0	0	6	0	0	0	0	0	0	0	0	0	0	0	0	0	0	0	0	0	0	0	0	0	0	0	0	0	0	0	0	0	0	0	0	0	0	0	0	0	0	0	0
003ab8d39974929a69d13754a4062ee8	AGCTCCAATAGCGTATATTAAAGTTGTTGCAGTTAAAAAGCTCGTAGTTGAATTTCGGGTTTCCGGCGCGTCCACTTCATTGTGGGCTCACGGGGACCCTCCTCGCCTTAGGGCGTCATTTACTGTGAAAAAATTAGAGTGTTCAAAGCAGGCAATCGCTTGAATACATTAGCATGGAATAATAAGATAGGATTTCGTCTATTTTGTTGGTTGCGGACGACAATAATGATTAATAGGGATAGTTGGGGGTGTCCGTATTGAGCTGTCAGAGGTGAAATTCTTGGATTTGCTCAAGACGAACTACTGCGAAAGCATTCACCAAGGATGTTTTCATCAATCAAGAACGAAAG	Eukaryota;Stramenopiles;Opalozoa;Bicoecea;Anoecales;Caecitellaceae;Caecitellaceae_X;Caecitellaceae_X_sp.;	0.907065	0	0	0	0	0	0	0	0	0	0	0	0	0	0	0	0	0	0	0	0	0	0	0	0	0	0	0	0	0	0	0	0	0	0	0	0	585	591	0	0	0	0	0	0	0	0
003e727d422b8971074e30067fc0902e	AGCTCCAATAGCGTATATTAAAGTTGTTGTGGTTAAAAAGCTCGTAGTCGTTTTTTGGGTTTGGCTGGCCGGTCCCCCTCACCGGGTGCACTGAACCAGCCGAACCTTTCCCTCTGTGGAACCCCATGGCCTTCACTGGTCGTGGCGGGGAAACAGGACTTTTACTTTGAAAAAATTAGAGTGCTCCAGGCAGGCCTATGCTCGAATACATTAGCATGGAATAATAGAATAGGACGCGTGGTTCTATTTTGTTGGTTTCTAGGACCGCCGTAATGCTTAATAGGGACAGTCGGGGGCATCAGTATTCAATTGTCAGAGGTGAAATTCTTGGATCTATTGAAGACTAACTACTGCGAAAGCATTTGCCAAGGATGTTT	Eukaryota;Opisthokonta;Fungi;Ascomycota;Pezizomycotina;Sordariomycetes	0.999998	0	0	0	0	0	0	0	0	0	0	0	0	0	0	0	0	0	0	0	0	0	0	0	0	0	0	0	0	0	0	0	2	0	0	0	0	0	0	0	0	0	0	0	0	0	0
00c17eda7dacd7c6bd535e56b1730890	AGCTCCAGAAGCGTATGCTAACGTTGTTGCAGTTAAAAAGCTCGTAGTTGAAGGTTTTTCGGTTGGGTCCGTGCGGGCGAATGCCTCGCGGGCCGGCCTTTTTCTTTCCTGGCTCTCTCTTTGGGGGGGCCTCGTTCACTGTAAACAAATTGGAGTGCTCCACGCAGGTCGTTGGGACCTGGACAATTGTTATGGGATGATGAGATAGGGCTCGGGCACTATTTTGTCGGTTTGCATGCCTGGGTAATGGTGAATAGGAACAGTTGGGGATATTCGTATTTAGCGGTCAGAGGTGAAATTCTTGGATTCGGGAAAGACGAACAACTGCGAAGGCATTTATCAAAGATGTTT	Eukaryota;Stramenopiles;Sagenista;Labyrinthulomycetes;Thraustochytriales;Thraustochytriaceae;Thraustochytriaceae_X;Thraustochytriaceae_X_sp.;	0.888939	0	0	0	0	0	0	0	0	0	65	0	0	0	44	0	0	0	0	0	0	0	0	0	0	0	0	0	0	0	0	0	63	0	0	0	0	0	0	0	0	0	0	0	0	0	0
0123731a2cbb6b740726b16f74c10653	AGCTCCAATAGCGTATATTAAAGCTGTTGCGGTTAAAAAGCTCGTAGTTGGATTTGAGTCTAGTTGCGGCCGGGCTCAGGGCTTTGACTCTGGGGCGGGCGTGTAGACTGTATGCGCGCGGGGAGGGGCAGGGATTTTTCTCTGCTTTCTCGTGTGCTTTACTTTGAACAAATTAGAGTGTTTAAAGCAGGCATTTTTTGCCTTGAATACATTAGCATGGAATAACGATTTTGACTGGAGCAGGCATGATGTTGTCTTGATGACTGCGCAGTAATGATGGATAGGGACGGTCGGGGACATTCGTATTGCTCCGTCAGAGGTGAAATTCTTAGATTGGAGGAAGACGAGCTGATGCGAAAGCCTTTGTCAAGGACGTTT	Eukaryota;Apusozoa;Apusomonadidae	1	0	0	0	0	0	0	0	0	0	0	0	0	0	0	0	0	0	0	0	0	0	0	0	0	0	0	109	0	0	0	0	0	0	0	0	0	0	0	0	0	0	0	0	0	0	206
013bee6df05a7c03f7666f51822f5aae	AGCTCCAATAGCGTATATTAAAGTTGTTGCAATTAAAAAGCTCGTAGTTGAATTTCTGGGCGGGCGCAGCGGTCGTGTGGTCGCAAGGCTGCAGTGTTACTTGTTCTGCGTGTTCCGTTCTGTTACTTTTTGCAGGGTGCATGAGTGTGCGGGTCTTAGTTGGTCCGCGTCTTGTGTGTCTTACTCCCTGCATCGATTACTGTGAACAAATTAGAGTGTTCAAAGCGGGCGGTTTGCTGCTTGAATACATTAGCATGGAATAATGACATAGGACTTTGGTGCTATTTCGTTGGTTGTGTACCAAGGTAATGATTAAAAGGGATAGTTGGGGGTATTCATATTTGATTGTCAGAGGTGAAATTCTTGGATTTATTAAAGATGAACAAGTGCGAAAGCATT…	Eukaryota;Stramenopiles;Opalozoa;Bicoecea;Bicoecales;Bicoecaceae;Bicoecaceae_X;Bicoecaceae_X_sp.;	0.999916	0	0	0	0	0	0	0	0	0	0	0	0	0	0	0	0	0	0	0	0	0	0	0	0	0	0	0	6	0	0	0	0	0	0	0	0	0	0	0	0	0	0	0	0	0	0
0150121778cb1ec12f284d218e52b36e	AGCTCCAAAAGGATATATCAACGTTGTTGCAGTTAAAAAGCTCGTAGTTGAATTTCGGGAGGGTTGTTGTTTGTTTCTTAGCTCCGCAAGGGGTTTTGATTCGGGCCGCCCTTCTTTTTGTGGAATCTATCTTGTTCAGTTGTTTACTCAGCTGGATAAGGTACCACTCAGTCACTGAGAGCAAATTGGAGTGCTCAAAGCAGGCTTGATAGCTTTGAACATTTTAGCTTGGAATGACAAGATATGACTTTAGTTCTATTTTGTTGGTTATGGAACCGAAGTAATGATTAACAGGAACAGTGCGGGGGTACTCGTATTGAAAGGTCAGAGGTGAAATTCTTGGATTCTTTCAAGACGAACGACTGCGAAAGCATTTACCAAGGATGTTT	Eukaryota;Stramenopiles;Sagenista;Labyrinthulomycetes;Thraustochytriales;Thraustochytriaceae;Thraustochytriaceae_X;Thraustochytriaceae_X_sp.;	0.999874	0	0	0	0	0	0	0	0	0	0	0	0	0	0	0	0	0	0	0	0	0	0	0	0	0	0	0	0	0	0	0	0	0	0	0	0	10	0	0	0	0	0	0	0	0	0
0154b77ed334e357642b74ffdf1fb242	AGCTCCAATAGCGTATATTAAAGTTGTTGCAGTTAAAACGCTCGTAGTTGAATTTTGGGTCGGACGTGATCTGCGGGTCAAAGACTTTAGCGGAATGCGCCGGCCAATATTTTTTCCGGAGTGGTCCTGGTTTGCTCTTTATTGGGTGGCAGGAGTTCACTGCTCCGGACGTTTACTTTGAAAAAATTAGAGTGTTCAAAGCAGGCGTTTTCGCTGTGAATACATTAGCATGGAATAATGGAACAGGACTTTGGTCGTGTTTTGTTGGTTTTAATGGCCGAAGTAATGATTAATAGGGATAGTTGGGGGCATTCGTATTTCGTTGTCAGAGGTGAAATTCTTGGATTTACGAAAGACGAACTACTGCGAAAGCATCTGCCAAGGATGTTT	Eukaryota;Apusozoa;Hilomonadea;Planomonadida;Planomonadidae;Planomonadidae_X;Micronuclearia;Micronuclearia_podoventralis;	0.906885	0	0	0	0	0	0	0	0	0	0	0	0	0	0	0	0	0	0	0	0	0	0	0	0	0	0	0	0	0	0	0	0	0	0	0	0	0	0	0	0	0	0	0	0	0	0
015c351a1ec4fd716489026ca752a379	AGCTCCAATAGCGTATATTAAAGTTGTTGCAGTTAAAAAGCTCGTAGTTGAACTTCTGGCTACTAACCAATTGGCTTCGGTCGAGGGGGGAGTGGTCATCAGCCAGAGAACTTTAGTAGTCCTTAACTGGTCGCTGGGGGATCTGGCGTTTTACTTTGAAAAAATCAGAGTGTTCAAGGCAGGCATTCGCCCTGAATACACAAGCATGGAATAATGGAATAGGACTATGGTCCATTTTGTTGGTTATTGGACCTTAGTAATGATTAATAGGAACAGTTGGGGGCATTAGTATTTAATTGTCAGAGGTGAAATTCTTGGATTTATTAAAGACTAACTTATGCGAAAGCATTTGCCAAGGATGTTT	Eukaryota;Alveolata;Ciliophora	0.999936	0	0	0	0	0	0	0	0	0	0	0	0	0	0	0	0	0	0	0	0	0	0	0	0	0	0	0	0	0	0	0	0	0	0	0	0	0	0	0	0	0	0	0	2	0	0
0193f3b10832a1bcff6248c3f5f401ea	AGCTCCAATAGCGTATATTAAAGTTGCTGCAGTTAAAAAGCTCGTAGTTGGATTTCTGGCTTGCAACCTTACGCCGGCCACGGTTTCGTGTGTTAGTGCGTGCGGTTCTGGCCATCCTTCCAATCGCTATTCATTCATCTTCATTGATGGGTGAGTGGTATTGGATCTTTTACTTTGAAAAAATTAGAGTGTTTCAAGCAGGCTTTATGCTATGAATACATTAGCATGGAATAATAATTTAGGACTTCGGTTCTATTTTGTTGGTTTCTAGGACTGAAGTAATGATTGATAGGGATAGTTGGGGGTGCTAGTATTCAGCGGCCAGAGGTGAAATTCTCGGATTCGCTGAAGACTAACTTATGCGAAAGCATTCACCAAGGATGTCT	Eukaryota;Rhizaria;Cercozoa;Filosa-Sarcomonadea;Glissomonadida;Sandonidae;Neoheteromita;Neoheteromita_sp.;	0.992881	0	0	0	0	0	0	0	0	0	0	0	0	0	0	0	0	0	0	0	0	0	0	4	0	0	0	0	0	0	0	0	0	0	0	0	0	0	0	0	0	0	0	0	0	0	0
01a955bcd7a37146d1b4d402eb4fde64	AGCTCCAATAGCGTATATTAAAGTTGTTGCAGTTAAAAAGCTCGTAGTTGAATTTCTGCACGTGCCCGGTTGTGGCTTCGGTCAGGCCGTGGCGCGTGCATCCGCCTGCAAACCTAGACCGGCCTTCACTGGTCGACTAGGGGAGTAGGCCTTTTACCTTGAAAAAATTAGAGTGTTTCTAGCAGGCAATTGCTTGAATACATTAGCATGGAATAATAGAATAGGACTTTTGTCCATTTCGTTGGTTATTGGACATTAGTAATGATTAAAAGGGACAGTTGGGGGCATTAGTATTTAATTGTCAGAGGTGAAATTCTTGGATTTGTTAAAGACTAACTTATGCGAAAGCATTTGCCAAGGATGTTTTCATTAATCAAGAACGAAAG	Eukaryota;Alveolata;Ciliophora;Oligohymenophorea;Scuticociliatia_1;Pseudocohnilembidae;Pseudocohnilembus	1	0	0	0	0	0	0	0	0	0	0	0	0	0	0	0	0	0	0	0	0	0	0	0	0	0	0	0	0	0	0	0	0	0	0	0	0	0	0	0	0	0	0	0	0	0	0
01c13d00fd87ee63cf87e6d988e36104	AGCTCCAATAGCGTATATTAAAGTTGTTGCAGTTAAAACGCTCGTAGTTGAACTATGGTCTTGGCTGGGCGGTCTTGACAATGTCTTGTACTTCTCTGGCTGAGACTTTCCTTCTGGCGAACTATTGTGCTATTTACTTAGTGCGATAGGGAACCAGGACTTTTACTTTGAAAAAATTAGAGTGTTTAAAGCAGGCGTCTGCCCGTATACATTAGCATGGAATAATAAAATAGGACTTTGGTTTTATTTTGTTGGTTTTCGAAACCGAAGTAATGATTAATAGGGATAGTTGGGGGCGTTACTATTCAGGAGTCAGAGGTGAAATTCTTGGATTTCCTGAAGAGTATCTACTGCGAAGGCATTCGCCAAGGATGTTT	Eukaryota;Opisthokonta;Fungi;Chytridiomycota;Chytridiomycotina;Chytridiomycetes;Kappamyces;Kappamyces_sp.;	0.8821	0	0	0	0	0	0	0	0	0	0	0	0	0	0	0	0	0	0	0	0	0	0	0	0	2	0	0	0	0	0	0	0	0	0	0	0	0	0	0	0	0	0	0	0	0	0
01e31205cc5b1b7eeab5b41ddd8eb11d	AGCTCCAATAGCGTATATTAAAGTTGTTGCAGTTAAAAAGCTCGTAGTTGAACTTCTGGTGAGGGGTAGGTTCGGCTTTGGTCGGCCTAAATCTCATCATCCGATTATAAACTACGTATGTGATTAAGTTCACAGCGTAGGGAGTAATCATTTTACTTTGAAAAAATTAGAGTGTTTCAGGCAGGCAATCGCCCGAATACATTAGCATGGAATAATGGAATAGGACTTTGGTTCATTTGGTTGGCTATTGAATCAGAGTAATGATTAATAGGGACAGTTGGGGGCATTAGTATTTAATTGTCAGAGGTGAAATTCTTGGATTTATTAAAGACTAACTTATGCGAAAGCATTTGCCAAGGATGTTT	Eukaryota;Alveolata;Ciliophora;Oligohymenophorea;Oligohymenophorea_X;Oligohymenophorea_XX;Cinetochilum;Cinetochilum_ovale;	1	0	0	0	0	0	0	0	0	0	0	0	0	0	0	0	0	0	0	0	0	20	0	0	0	0	0	0	0	0	0	0	0	6	0	0	0	0	0	0	0	0	0	0	0	0	0
0202cf4c5101e86ec116603703565954	AGCTCCAATAGCGTATATTAAAGTTGTTGCAGTTAAAAAGCTCGTAGTTGAAGATTTGGCTAATGGACCACCACAGAGTGGAGGGTCCTGTGTCGATTATCACAAAGAAGCTTTTGCGCATTAATTTGTGCTCTAGCCGAGATGTGTCCTTTACTGTGAACAAATTAGGGTGTTTAAAGCAGGCTAACGTTTGAATACACTAGCATGGAATAATAAGATATGACTCCTGTTGCATATGCTGGTGGCTATGGGAGTAATGATTGACAGGAACAGTCGTGGGTATTCGTATGAGCATGTCAGAGGTGAAATTCTTGGATTTTGATCAGACGAACTACTGCGAAAGCATTTACCAAGGATGTTT	Eukaryota;Stramenopiles;Sagenista;Labyrinthulomycetes;Labyrinthulales;Labyrinthulaceae;Labyrinthula;Labyrinthula_sp.;	0.86889	0	0	0	0	0	0	0	0	0	0	0	0	0	0	0	0	0	0	0	0	0	0	0	0	0	0	0	0	0	0	69	0	0	0	0	0	0	0	0	0	0	0	0	0	0	0
021ed1fb2297c295a28c3bc7992ea6e7	AGCTCTAATAGCGTATATTAAAGTTGTTGCAGTTAAAAAGCTCGTAGTTGAACTTCTGTGTATATCCTGTCGTGGCTTCGGTCAGTCAGTGATGTGCACATCCGCTTGCAAACTAGGACCGGCCTTTACTGGTCGACCTAGGGAGTAGGCTTTTTACTTTGAAAAAATTAGAGTGTTTCAAGCAAGCAATGGCCTGAATACATTAGCATGGAATAATGGAATAGGACTTTTGTCTATTTGGTTGGTTATTAGACATGAGTAATGATTAACAGGGACAGTTGGGGGCATTAGTATTTAATTGTCAGAGGTGAAATTCTTGGATTTATTAAAGACTAACTTATGCGAAAGCATTTGCCAAGGATGTTT	Eukaryota;Alveolata;Ciliophora;Oligohymenophorea;Scuticociliatia_1;Philasterida;Mesanophrys;Mesanophrys_carcini;	0.997288	0	0	0	17	0	18	14	0	0	6	5208	1364	0	0	17	0	24	18	0	23	972	0	0	0	0	0	35	0	0	0	0	0	17	0	0	0	0	0	0	0	0	0	0	0	0	813
0237a46ce0205997e0f7875d60ae2a73	AGCTCCAATAGCGTATATTAAAGTTGTTGCAGTTAAAAAGCTCGTAGTTGGATTTCGGAAGGTCCTTAGTAATCCGCCCCTTCGGGGAGCGGGTTGCTGGCCTCCTATGTTCCTAACGGTCCTCATCCGCGAGGGTGGGGAATCAACCGCTAGGATCGTTTACTTTGAGGAAATTAGAGTGTTCAAAGCAGGCGTAACTCGCCTCCGAATACGTTAGCATGGGATAATGGAATACGACTTCGGTCTTGTTTCGTTGGTTTCGCTTGGCTGAAGTAATGATTGATAGGGACAGTTGGGGGCATTAGTATTTAGTTGTCAGAGGTGAAATTCTAGGATTTACTAAAGACTGACCAATGCGAAAGCATTTGCCAAGGATGTTT	Eukaryota;Amoebozoa;Lobosa;Tubulinea;Echinamoebida;Vermamoebidae	1	0	0	0	0	0	0	0	0	0	0	14	0	0	0	0	0	0	0	0	0	0	0	0	0	0	0	0	0	0	0	0	0	0	0	0	0	0	0	0	0	0	0	0	0	0	0
028c45d6c694ff824127b074aae145ea	AGCTCCAATAGCGTATATTTAAGTTGTTGCAGTTAAAAAGCTCGTAGTTGGATTTCTGGCAGGACTCTAATGTCCGCTCGTTGCGTGTGCATATGCGTCCTGCCATCCTTCTGTTAACTGTTCTGGTATTCGTTTACTGGTTCAGAGCCCAGATATTTTACCTTGAGAAAATTAGAGTGTTTCAGGCAGGCTTGCGCTTGAATACATTAGCATGGAATAATAGAATAGGACTTTGGTCTCTTTTGTTGGTTTGAGGGACTAGAGTAATGGTTAATAGGGACAGTTGGGGGCATTAGTATTTAATTGTCAGAGGTGAAATTCTCGGATTTGTTAAAGACTAACTTATGCGAAAGCATTTGCCAAGGATGTTT	Eukaryota;Alveolata;Ciliophora;Spirotrichea;Hypotrichia;Pseudourostylidae;Nothoholosticha;Nothoholosticha_fasciola;	0.935103	0	0	0	0	0	0	0	0	0	0	0	0	0	0	0	0	0	0	0	0	0	0	0	0	0	0	0	0	0	0	0	0	0	0	0	0	0	0	0	0	0	0	0	0	0	0
028ed77d8cf4fa7b2df0552691a90732	AGCTCCAATAGCGTATATTAAAGTTGTTGCGGTTAAAAAGCTCGTAGTTGGATTTTGGGACTAGAACTTTGGGTCCGGTTTACCCGCGCACTCGCGGTTCTGTCCTTCTGTCTGGAGAGTCGCGGTCGTGCTTCATTGCGCGGGCGCGGCGATCTAGGACTTTTACTTTGAACAAATTAGAGCGTCCATCGCAGGCCTACACGCCTTGAATACATTAGCATGGAATAACGCATAGGACTTCAGTTCTATTTTGTTGGTTTTAAGGACCGAAGTAATGATTAATAGGGACAGTTGGGGGCGTTAATATTTAATTGTCAGAGGTGAAATTCTTAGATTTATGAAAGATTAACTTCTGCGAAAGCATTCGCCAAGGATGTTT	Eukaryota;Apusozoa;Apusomonadidae;Apusomonadidae_Group-1;Apusomonadidae_Group-1_X;Apusomonadidae_Group-1_XX;Amastigomonas;Amastigomonas_bermudensis;	1	0	0	0	0	0	0	0	0	0	0	0	0	0	0	0	0	0	0	0	0	2	0	0	0	0	0	0	0	0	0	0	0	0	0	0	0	0	0	0	0	0	0	0	0	0	0
036c7ef333a4a3dec597453dd2a9f2be	AGCTCCAATAGCGTATATTAAAGTTGTTGCAGTTAAAAAGCCCGTAGTTGAACTTCGGGTCCGGCTGAGTGGTCTTGCCAATGGTAAGTACTGCTCTGGTCGGATCTTTCTTTCTGGGGAACCAATGTGCTCTTAACTGAGTGCGCTGGGGATCCAGGACTTTTACTTTGAAAAAATTAGAGTGTTTAAAGCAGGCCTACGCTTGAATACGTTAGCATGGAATAATAGAATAGGACTTTGGTTCTATTTTGTTGGTTTCTAGGACCGAGGTAATGATTAATAGGGATAGTTGGGGGCATTAGTATTTAATTGTCAGAGGTGAAATTCTTGGATTTATGAAAGACTAACTTCTGCGAAAGCATTTGCCAAGGATGTTT	Eukaryota;Opisthokonta;Fungi;Chytridiomycota;Chytridiomycotina;Chytridiomycetes	0.996037	0	0	0	0	0	0	0	0	0	0	0	0	0	0	0	0	0	0	0	0	0	0	0	0	0	0	0	0	0	0	0	80	0	0	0	0	0	0	0	0	0	0	0	0	0	0
039a10a76d3bc6d8d8f596638ae862ce	AGCTCCAGAAGCGTATGCTAACGTTGTTGCAGTTAAAAAGCTCGTAGTTGAAGGTTTGTCGGTTGGGTCTGTGGGGTGAATGCTCTGTAGATCGGCCTTTTTCTTTTCCTGGCTCTCTCTTTGAGGGGGCCTCGTTCACTGTAAACAAATTGGAGTGCTCCACGCAGGTCGTTGGGACCTGGACAATTGTTATGGGATGATGAGATAGGGCTCGGGCACTATTTTGTCGGTTTGCATGCCTGGGTAATGGTGAATAGGAACAGTTGGGGATATTCGTATTTAGCGGTCAGAGGTGAAATTCTTGGATTCGGGAAAGACGAACAACTGCGAAGGCATTTATCAAAGATGTTT	Eukaryota;Stramenopiles;Sagenista;Labyrinthulomycetes;Thraustochytriales;Thraustochytriaceae;Thraustochytriaceae_X;Thraustochytriaceae_X_sp.;	0.90009	0	0	0	0	0	0	0	0	0	0	0	0	0	0	0	0	0	0	0	0	0	0	0	0	0	0	0	0	0	0	0	72	0	0	0	0	0	0	0	0	0	0	0	0	0	0
03e334822d239451f88960beafc891c9	AGCTCCAATAGCGTATATTAAAGTTGTTGTGGTTAAAAAGCTCGTAGTTGAACCTTGGGCCTGGCTGGCCGGTCCGCCTCACCGCGTGCACTGGTCCGGCCGGGCCTTTCCCTCTGTGGAACCCCATACCCTTCACTGGGCGTGGCGGGGAAACAGGACATTTACTTTGAAAAAATTAGAGTGCTCCAGGCAGGCCTATGCTCGAATACATTAGCATGGAATAATAAAATAGGACGCGCGGTTCTATTTTGTTGGTTTATAGGACCGCCGTAATGATTAATAGGGACAGTCGGGGGCATCAGTATTCAACTGTCAGAGGTGAAATTCTTGGATCAGTTGAAGACTAACTACTGCGAAAGCATTTGCCAAGGATGTTT	Eukaryota;Opisthokonta;Fungi;Ascomycota;Pezizomycotina;Sordariomycetes	1	0	0	0	0	0	0	0	0	0	0	9	11	0	0	0	0	0	0	0	0	0	0	0	0	0	0	0	0	0	0	0	0	0	0	0	0	0	0	0	0	0	0	0	0	0	0
03e527aa5461aab151118b9d4c64f2c0	AGCTCCAATAGCGTATATTAAAGTTGTTGCAGTTAAAAAGCTCGTAGTTGGATTTCTGGAAGGGTGCCGAAGCCAGCTTCGTGCTGTCGCTGAAGCGCCCTTTCATCCTTCTGTTAACGCCTCTTGGCATTCATTTGCTGGTGGCGGGCTCAGATATTTTACCTTGAGAAAATTAGAGTGTTTCAGGCAGGCTAAGCCGGAATACATTAGCATGGAATAATGGAATAGGACTGAGGTCTCTTTGTTGGTTTGAGGGACTGCAGTAATGATTAATAGGGACAGTTGGGGGCATTAGTATTTAATAGTCAGAGGTGGAATTCTATGATTTGTTAAAGACTAACCTATGCGAAAGCATTTGCCAAGGATGTTT	Eukaryota;Alveolata;Ciliophora;Spirotrichea;Strombidiida;Strombidiidae_N;Strombidium_N;Strombidium_guangdongense;	0.999987	0	0	0	0	0	0	0	0	0	0	0	0	0	0	0	0	0	0	0	0	0	0	3	0	0	0	0	11	0	0	0	0	6	4	0	0	0	0	0	0	0	0	0	0	0	4
03ec79ccbfddef5a2f89bf080b5b487f	AGCTCCAGTAGCCTATCCACATGTTGTTGCAGTTAAAAAGCTCGTAGTTGAATGTCTGGGATTAGGGTCAGCCGCAACGCGGCGATCCTGCCCGCCCCGCCGTAAGGCGCTTTTACTGTGAAAAAATTAGAGTGTTCCAAGCAGGCCTAGCCTGAATACCTTAGCATGGAATAATAACATAGGACTGTCCGTGGTGTTGTTGGTTAGCATCCGGCGGTAATGATTAATAGGGACGATCGGGGGCATTTCTATTCAGCAGTCAGAGGTGAAATTCTTGGATTTGCTGAAGAGAAACTGCTGCGAAAGCGTCTGCCAAGGGCGTTT	Eukaryota;Opisthokonta;Fungi	0.792405	0	0	0	0	0	0	0	0	0	0	0	0	0	0	0	0	0	0	0	0	0	0	0	0	0	0	0	0	44	0	0	0	0	0	0	0	0	0	0	0	0	0	0	0	0	0
03f3e7da083fbc153604357935e55276	AGCTCCAGAAGCGTATGCTAACGTTGTTGCAGTTAAAAAGCTCGTAGTTGAAGGTTTGTCGGTTGGGTCTGTGGGGTGAATGCTCTGTAGGTCGGCCTTTTTTTTTCTTGGCTCTCTCTTTGGGGGGGCCTCGTTCACTGTAAACAAATTGGAGTGCTCCACGCAGGTCGTTGGGACCTGGACAATTGTTATGGGATGATGAGATAGGGCTCGGGCACTATTTTGTCGGTTTGCATGCCTGGGTAATGGTGAATAGGAACAGTTGGGGATATTCGTATTTAGCGGTCAGAGGTGAAATTCTTGGATTCGGGAAAGACGAACAACTGCGAAGGCATTTATCAAAGATGTTT	Eukaryota;Stramenopiles;Sagenista;Labyrinthulomycetes;Thraustochytriales;Thraustochytriaceae;Thraustochytriaceae_X;Thraustochytriaceae_X_sp.;	0.976564	0	0	0	0	0	0	0	0	0	35	0	0	0	0	0	21	0	71	0	0	0	0	0	0	0	0	0	0	0	0	0	43	0	0	0	0	0	0	0	0	0	0	0	0	0	0
04175477b8b6dc776a59bd34949a9342	AGCTCCAATAGCGTATATTAAAGTTGTTGCAGTTAAAAAGCTCGTAGTTGGATTTGTGGTCGGAGCGACCGTCCCTTCACTCAGTGTTGGTGTTGTGTCGTCTCTGACCATCCTTGGGTGGAACCTGTGTGGCATTCAGTTGTCGTGCAGGGGATGCCCATCGTTTACTGTGAAAAAATTAGAGTGTTCAAAGCAGGCTTACGCCGTTGAATATATTAGCATGGAATAATAAGATAGGACCTTGGTACTATTTTGTTGGTTTGCGCACCAAGGTAATGATTAATAGGGACAGTTGGGGGTATTCGTATTCCATTGTCAGAGGTGAAATTCTTGGATTTTTGGAAGACGAACTACTGCGAAAGCATTTACCAAGGATGTTT	Eukaryota;Stramenopiles;Ochrophyta;Bacillariophyta;Bacillariophyta_X;Araphid-pennate;Dimeregramma;Dimeregramma_sp.;	0.999894	0	0	0	0	5	0	0	0	0	0	0	0	0	0	0	0	0	0	0	0	0	0	0	0	0	0	0	0	0	0	0	0	0	0	0	0	0	0	0	0	0	0	0	0	0	0
0445b1045207647200544aaac1f23334	AGCTCCAATAGCGTATATTAAAGTTGTTGCAATTAAAAAGCTCGTAGTTGAATTTCTGGGCGGGCGCAGCGGTCGTGTGGTCGCAAGGCTGCAGTGTTACTTGTCTGCGTGTTCCGTCTTGTTAGCTTTTGCAGGGTGCGTGTACGGAGGTGTCTTAGTTGGCACGTGCCGGGGCGTGACTTACTCCCTGCATCGATTACTGTGAACAAATTAGAGTGTTTAAAGCAGGCTTGATTGCTTGAATACATTAGCATGGAATAATGATATAGGACTTTGGTGCTATTTCGTTGGTTGTGTACCAGAGTAATGATTAATAGGGATAGTTGGGGGTATTCATATTTGATTGTCAGAGGTGAAATTCTTGGATTTATTAAAGATGAACAACTGCGAAAGCATTTA…	Eukaryota;Stramenopiles;Opalozoa;Bicoecea;Bicoecales;Bicoecaceae;Bicoecaceae_X;Bicoecaceae_X_sp.;	0.982985	0	0	0	0	0	0	0	0	0	0	0	0	0	0	0	0	0	0	0	0	1	0	0	0	0	0	0	0	0	0	0	0	0	0	0	0	0	0	0	0	0	0	0	0	0	0
045279c8ae48a1c5c1cd40f392e31912	AGCTCCAGAAGCGTATGCTAACGTTGTTGCAGTTAAAAAGCTCGTAGTTGAAGGTTTTTCGGTTGGGTCTGTGGGGTGAATGCTCCGCAGATCGGCCTATTTTTTCCTTGGCTCTCTCTTTGAGGGGGCCTCGTTCACTGTAAACAAATTGGAGTGCTCCACGCAGGTCGTTGGGACCTGGACAATTGTTATGGGATGATGAGATAGGGCTCGGGCACTATTTTGTCGGTTTGCATGCCTGGGTAATGGTGAATAGGAACAGTTGGGGATATTCGTATTTAGCGGTCAGAGGTGAAATTCTTGGATTCGGGAAAGACGAACAACTGCGAAGGCATTTATCAAAGATGTTT	Eukaryota;Stramenopiles;Sagenista;Labyrinthulomycetes;Thraustochytriales;Thraustochytriaceae;Thraustochytriaceae_X;Thraustochytriaceae_X_sp.;	0.793624	0	0	0	0	0	0	0	0	0	0	0	0	0	0	0	36	0	0	0	0	0	0	0	0	0	0	0	0	0	0	0	0	0	0	0	0	0	0	0	0	0	0	0	0	0	0
04c26e88fb38c435ef55d2084e4e0593	AGCTCCAATAACGTATGTTAAAGTTGTTGCAGTTAAAAAGCTCGTAGTCTGATTCTTGGCCTGGCGGAGAGCGTCGGCGGCCCACAAGGTCGCCGGGCGCGACCCGCTGGCCATGTACTTCGGAGGAGCGCGTGTGCTTTTCATTAAGTGGGCGTGGGATTCCGATAGTTTACTTTGAGAAAAATAGAGTGTTCAAAGCAGGCGATTGCCTTGAATACATTAGCATGGGATAATGGAATAGGACATTGGTTCTATTTTGATGGTTTAAGGGCCGATGTAATGATTAATAGGGACGGTTGGGGACATTTATATTCCATGGCTAGAGGTGAAATTCTTGGATTCATGGAAGATAAACTGCTGCGAAAGCGCCTGTCAAAGACGTTT	Eukaryota;Hacrobia;Centroheliozoa;Centroheliozoa_X;Pterocystida;Pterocystidae;Raineriophrys	0.869662	0	0	0	0	0	0	0	0	0	0	0	0	0	0	0	0	0	0	0	0	0	0	0	0	0	0	0	0	0	0	0	0	0	0	0	0	0	0	0	0	0	0	0	0	0	0
04e7b53d4e22d3576e17ec04a6aef03c	AGCTCCAATAGCGTATATTAAAGTTGTTGCAGTTAAAAAGCTCGTAGTTGAACTTCTGTACAGTCTCATTTCTGGCTTAGGTCAAGATGTTGGCTGTGCATCCGCTTGCAAAGCTGGTTCGGCCTTAACTGGTCGGCTAGTAGAGTAAGCCCTTTACTTTGAAAAAATTAGAGTGTTTCAGGCAGGCAATGGCTCGAATACATTAGCATGGAATAATGGAATAGGACTTTTGTCCATTTGGTTGGTTATTGGACATGAGTAATGATTAAAAGGGACAGTTGGGGGCATTGGTATTTAACAGTCAGAGGTGAAATTCTTGGATTTGTTAAAGACTAACTTATGCGAAAGCATTTGCCAAGGATGTTTTCATTGATCAAGAACGAAA	Eukaryota;Alveolata;Ciliophora;Oligohymenophorea;Scuticociliatia_1;Philasterida;Uronema;Uronema_marinum;	0.999922	0	0	0	0	0	0	0	0	0	0	0	0	0	0	0	0	0	0	0	0	0	0	0	0	0	0	0	0	0	0	0	0	0	0	0	0	0	0	0	0	0	0	0	29	0	0
050cee7d820dcb05c8bccd9b76747a3f	AGCTCCAATAGCGTATATTAATACTGTTGCAGTTAAAAGGCTCGTAGTCGAAATTGTGGCTTGGTGGACCTAGTCTACTGTCTAGAACAGTGTGTTCTGGTGTTCATAAGTCATCCTTCTGGAGATCATTTCTGCTCTTGATTGAGTGGTTTTGTAATCTAGATCATTTACTGTGAGTAAATCAGAGTGTTCAAAACAGGCATTTCGCTTGCATGCTCCAGCATGGAATAATAAGATAGGACTTTGGTTCTATTTTGTTGGCTTTCAGAACTTAAGTAATGATGGAAAGAAATAGTTGGGGGTGCTAGAATTTAACGGCTAGCGGTGAAATGCATGGATCCGTTAAAGACTAACTTATGCGAAAGCATTCACCAAGGATATTT	Eukaryota;Rhizaria;Cercozoa;Endomyxa;Vampyrellida	0.999875	0	0	0	0	0	0	0	0	0	0	0	0	0	0	0	0	0	0	0	0	0	0	0	0	0	0	0	8	0	0	0	0	0	0	0	0	0	0	0	0	0	0	0	0	0	0
0552af9747b18f8def55580d94f39281	AGCTCCAATAGCGTATATTAAAGTTGTTGCAGTTAAAAAGCTCGTAGTTGAATTTCGGGTTTCCGGCGCGTCCACTTCATTGTGGGCTCACGGGGACCCTCCTCGCCTTAGGGCGTCATTTACTGTGAAAAAATTAGAGTGTTCAAAGCAGGCAATCGCTTGAATACATTAGCATGGAATAATAAGATAGGATTTCGTCTATTTTGTTGGTTGCGGACGACAATAATGATTAATAGGGATAGTTGGGGGTGTCCGTATTGAGCTGTCAGAGGTGAAATTCTTGGATTTGCTCAAGACGAACTACTGCGAAAGCATTCACCAAGGATGTTTTCATTAATCAAGAACGAAAG	Eukaryota;Stramenopiles;Opalozoa;Bicoecea;Anoecales;Caecitellaceae;Caecitellaceae_X;Caecitellaceae_X_sp.;	0.907065	0	0	0	0	0	0	0	0	0	0	0	0	0	0	0	0	0	0	0	0	0	0	0	0	0	0	0	0	0	0	0	0	0	0	0	0	0	137	0	0	0	0	0	0	0	0
055f1d18b11547b1bfc462d566f41523	AGCTCCAATAGCGTATATTAAAGTTGTTGCAGTTAAAAAGCTCGTAGTTGGATTTTTGACAGGAGCGACCATGCCGGGCTTGATTGTCCGTGTTTTGTGTTGTCTCCAGTCATCCTCGTGGAGAGCGTTTCTGGCATTAATTTGTTGGAGGCGGGACCCGCGTCATTTACTGTGAAAAAATTAGAGTGTTTAAAGCAGGCAATTGGCTTGAATACATTAGCATGGAATAATAAGATAGGACTTTGGTGCTATTTTGTTGGTTTGCACATCAAGGTAATGATTAACAGAATCAGTCGGGGATATTCGTATGCAAATGTCAGAGGTGAAATTCTTGGATTTTTTACAGACGAACTACTGCGAAAGCATTTATCAAGGATGTTT	Eukaryota;Stramenopiles;Sagenista;Labyrinthulomycetes;Labyrinthulales;Labyrinthulaceae;Labyrinthulaceae_X;Labyrinthulaceae_X_sp.;	0.999696	12	37	19	37	34	71	32	42	19	30	25	21	230	40	68	49	22	608	477	1212	0	0	0	108	0	0	0	67	67	0	0	0	88	0	32	34	0	0	0	0	0	0	151	74	0	0
056486fe0b1b5d88c9fe6ea4b5edd43d	AGCTCCAATAGCGTATATTAATGTTGTTGCAGTTAAAAAGCTCGTAGTTGGATTTCTGACAAGAATGGCCGGTCCGGATCTTCGGATCTGTGTACTTGTGCTTGTTCTAGTCATCCTTATAGAGAACATGATTGGTATTAACTTACCTTTTATGGGACCTATATCATTTACTGTGAAAAAATTAGAGTGTTCAAAGCAGGCAATCGCTGTGAATACATTAGCATGGAATAATAAGATAGGACTTTGGTACTATTTTGTTGGTTTGCATACCAAGGTAATGATTAAGAGGGACAGTTGGGGGTATTCGTATTTAATTGTCAGAGGTGAAATTCTTGGATTTATGAAAGACGAACTACTGCGAAAGCATTTACCAAGGATGTTT	Eukaryota;Stramenopiles;Sagenista;Labyrinthulomycetes;Labyrinthulales;Labyrinthulaceae;Labyrinthulaceae_X;Labyrinthulaceae_X_sp.;	0.846287	0	0	0	0	0	0	0	0	0	0	0	0	0	0	0	0	0	0	0	0	0	0	0	0	0	0	0	0	50	0	0	0	0	0	0	0	0	0	0	0	0	0	0	0	0	0
05841baa87d38fa27e6e05284fe00634	AGCTCCAATAGCGTATATTAAAGTTGTTGCAGTTAAAACGCTCGTAGTTCGATTTCTGTGGGCAGACTTTGGAAAACCCTGCGGGGTGATCCGTGTTTGTTCACATCCTTCTGTTAACCTTGTTGGCTTTCATTAGTCAGCTTGGAGCTCAGATACTTTACCTTGAGGAAATTAGAGTGTTTCAGGCAGGCTTGCGCCGGAATACATTAGCATGGAATAATAGAACAGGACTCCTTTTCATTGTTGGTCTATGATGGGAGTAATGATTAATAGGGATAGTTGGGGGCATTAGTATTTAATTGTCAGAGGTGAAATTCTTTGATTTGTTAAAGACTAACTTATGCGAAAGCATTTGCCAAGAATGTTT	Eukaryota;Alveolata;Ciliophora;Spirotrichea;Euplotia;Aspidiscidae;Aspidisca;Aspidisca_aculeata;	0.995021	0	0	0	0	0	0	0	0	0	0	0	0	0	0	0	0	0	0	0	0	0	0	0	2139	238	14	0	0	9	0	0	0	0	0	0	0	0	0	5	0	49	0	4	0	0	0
0590971802707ef0cac4ef1e43be7e1e	AGCTCCAATAGCGTATATTTAAGTTGTTGCAGTTAAAAAGCTCGTAGTTGGATTTCGGATGGGATTTGCCGGTCCGTCTTTGAGATGTGTACTGGTAAGTCCTATCTTGTTGTCGGGGACTAGCTCCTGGGCTTCACTGTCCGGGACTAGGAGCCGACGAAGTTACTTTGAGTAAATTAGAGTGTTCAAAGCAAGCCTACGCTCTGAATATATTAGCATGGAATAACACGATAGGACTCTGGCTTATCTTGTTGGTCTGTGAGACCAGAGTAATGATTAAGAGGGACAGTCGGGGACATTCGTATTTCATTGTCAGAGGTGAAATTCTTGGATTTATGAAAGACGAACTTCTGCGAAAGCATTTGTCAAGGATGTTT	Eukaryota;Archaeplastida;Chlorophyta;Chlorodendrophyceae;Chlorodendrales;Chlorodendraceae;Chlorodendrales_XX;Chlorodendrales_XX_sp.;	0.996292	9	10	0	42	0	0	0	0	0	0	0	0	0	0	0	0	0	0	0	0	0	0	0	0	0	0	0	0	0	0	0	0	0	0	0	0	0	0	0	0	0	0	0	0	0	0
0596d593f2c9731c22a72c831a79fcaf	AGCTCCAATAGCGTATATTAAATTTGTTGCAGTTAAAAAGCTCGTAGTTGAAATCCTGGTTAGAACTTGTGATGTTGCACTTGGTGCAGCAATCATTTTGCATTTGACCATCTTTGGGGGATATATAGCTGGCATTAAGCTGTTGGTTGTAGACATCCCATCCTTTACTGTGAAGAAAATAGAGTGCTCAAAGCAGGCTTATGCCAATGAATACATTAGCATGGAATAATAAGATAAGATAGTGATGTTACTTTGTTGGTTTATGTGTCATTATAATGTTTAAGAGGGACTGTTGGGGGTATTTGTATTCCACTGTCAGAGGTGAAATTCTTGGATTTTTGGAAGACACACAACTGCGAAAGCATTTACCAAGGATGTTT	Eukaryota;Stramenopiles;Ochrophyta;Bacillariophyta;Bacillariophyta_X	0.877576	0	0	0	0	0	0	0	0	0	0	0	0	0	0	0	0	0	0	0	0	0	0	0	0	0	0	0	0	0	0	0	19	0	0	0	0	0	0	0	0	0	0	0	0	0	0
05a4c0772ae56723f937c5a01e813528	AGCTCCAATAGCGTATATTAAAGTTGTTGCAGTTAAAAAGCTCGTAGTTGGACTTCTGGGAGGATGCAGTTGTCCGCCTTCACGGTGTGCGCAACAGCGTCCTTCCATCCTTCTGTCAACGCGTCTCGGGAGTCAAATCTCGGTCGTGGGCTCAGATATTTTACCTTGAGAAAATTAGAGTGTTTCAGGCAGGCTTGGTCCGGAATACATTAGCATGGAATAATAGAATAGGACTCCAGTCCCTTTGTTGGTTTCCGGGATTAGAGTAATGATTAATAGGGATAGTTGGGGGCATTAGTATTTAATTGTCAGAGGTGAAATTCTCGGATTTGTTAAAGACTAACTTATGCGAAAGCATTTGCCAAGGATGTTT	Eukaryota;Alveolata;Ciliophora;Spirotrichea;Hypotrichia;Urostylidae;Tunicothrix;Tunicothrix_wilberti;	0.968994	0	0	0	0	0	3	0	35	0	0	0	0	0	0	0	0	0	0	0	0	0	0	0	0	0	0	0	0	0	0	0	0	0	0	0	0	0	0	0	0	0	0	0	0	0	0
05ece504e1ef10b549b571e280220f30	AGCTCCAATAGTAGATATCAAAATTGTTGCAGTTGAAAAGCTCGTAGTTGAGATTCTGGGAAGTGTCGCTATTCTAGGCTTGACGAAAGTCATTCTAGTTGGTGAGCTTTCCATCTTGTGGAATCCGCGTTGTTCGTTTGTTCGGATGACGTGCCACTCAGTTACTGAGAGCAAATTGGAGTGCTCAAAGCAGGCTATACAGCTTTGAACAATTAAGCTTGGAATAACAATTAACGACTTGTTTGTAATTGTTGGTTGTACATTAACAAGTAATGCTTGAAAGGGAACAGTTGTCGGGGATATTCGTATGAGCAAGTCAGAGGTGAAATTCAAGGATTTTGCTTAGACGAACGACTGCGAAAGCATCTATCCAGCATGTTT	Eukaryota;Stramenopiles;Sagenista;Sagenista_X;Sagenista_XX;Sagenista_XXX;Diplophrys;Diplophrys_marina;	1	0	0	0	0	0	0	0	0	0	0	0	0	0	0	0	0	0	0	0	0	0	0	0	0	0	57	0	0	0	0	0	0	0	0	0	0	0	0	0	0	0	0	0	0	0	0
0637fc8231ac34c54d6a2e67cb7b229b	AGCTCCAATAGCGTATATTAAAGTTGTTGCAATTAAAAAGCTCGTAGTTGAATTTCTGGGCGGGCGCAGCGGTCGTGTGGTCGCAAGGCTGCAGTGTTACTTGTTTGCGTGTTCCGTTCTTACACCTTTTGTGGGGTGCGGTGGGGCCTGTGTCTTAGTTGGCACGGCTCGCCGTGACTTACTCCCTGCATCGATTACTGTGAACAAATTAGAGTGTTCAAAGCGGGCGGTTTGCTGCTTGAATACATTAGCATGGAATAATGACATAGGACTTTGGTGCTATTTCGTTGGTTGTGTACCAAGGTAATGATTAAAAGGGATAGTTGGGGGTATTCATATTTGATTGTCAGAGGTGAAATTCTTGGATTTATTAAAGATGAACAAGTGCGAAAGCATTTA…	Eukaryota;Stramenopiles;Opalozoa;Bicoecea;Bicoecales;Bicoecaceae;Bicoecaceae_X;Bicoecaceae_X_sp.;	0.999991	0	0	0	0	0	0	0	0	0	0	0	0	0	0	0	0	0	0	0	0	0	0	0	0	0	0	0	0	0	0	0	0	0	0	0	0	0	0	0	0	0	0	0	0	0	0
064b7c6db0ba8da6f6cffbd3ee72ec3f	AGCTCCAGTAGTGTATATCAAAGTTGTTGCGGTTAAAAAGCTCGTAGTTGGATTTCCCGGCAAAATAAGGTGCGGGATGTGGTCATTTGAACTGCGGCCGTGTCTTTTCCGGTGGTTGTGGTCTCCTTCTGGGGGGTCACGGCATGTACTTTGAACAAATTAGAGTGCTCAAGACAGGCGATTTTTTATTGCTGTGAATAGATTAGCATGGAATACGGGTATAAACTCTCTTCTCGGGATTGTTGTTTTGACGAGGAGGGGGAATGATGGATAGGGACAGGTGTGGGCATTGAGATTGTTACGTCAGAGGTGAAATTCTTAGATCGTAGCAGGATTAGCAGACGCGAAAGCATTTGTCAAGGATGTTT	Eukaryota;Apusozoa;Apusomonadidae;Apusomonadidae_Group-2;Apusomonadidae_Group-2B;Apusomonadidae_Group-2B_X;Apusomonadidae_Group-2B_XX;Apusomonadidae_Group-2B_XX_sp.;	1	0	0	0	0	0	0	0	0	0	0	306	541	0	0	0	0	0	26	0	0	0	0	0	0	0	0	0	0	0	0	0	0	0	0	0	0	0	0	0	0	0	0	0	0	0	0
0699cedddc191a2a8ade62d388f9ff77	AGCTCCAATAGCGTATATTAAAGTTGTTGCAGTTAAAAAGCTCGTAGTTGGATTTGTGGCGTTCGCGTGCGGCCCGGCATTCGTGCCGGTGTTTGCTAGCGTCGCCATCCTTGGGTGGAGCCTGTGTGGCATTAAGTTGTCGTGCAGGGGATGCCCATCGTTTACTGTGAAAAAATTAGAGTGTTCAAAGCAGGCTTACGCCGTTGAATATATTAGCATGGAATAATAAGATAGGACCTTGGTACTATTTTGTTGGTTTGCGCACCAAGGTAATGATTAATAGGGACAGTTGGGGGTATTCGTATTCCATTGTCAGAGGTGAAATTCTTGGATTTTTGGAAGACGAACTACTGCGAAAGCATTTACCAAGGATGTTT	Eukaryota;Stramenopiles;Ochrophyta;Bacillariophyta;Bacillariophyta_X;Raphid-pennate;Nitzschia;Nitzschia_sp.;	0.820567	0	79	0	0	0	0	0	0	0	0	0	0	0	0	0	0	0	0	0	18	0	0	0	0	0	0	0	0	0	0	0	0	0	0	0	0	0	0	0	0	0	0	0	0	0	0
06da54560385e78e5b6b76fea8450f46	AGCTCCAATAGCGTATATTAATGTTGTTGCAGTTAAAAAGCTCGTAGTTGAATTTCTGGAATGAACTTTCGGTCCGAGGCCTTGTGTCTTGCGTACTGTTCTTGTTCATCCCATCTTAGTAGTGAGTGTTACTGGCATTCGGTTGTCGGTTGCAGGAGCTGCTTCGTTTACTGTGAATAAAATAGAGTGTTTAAAGCAGGCATTACGCCTTGAATACTTCAGCATGGAATAAAATTATAGGACTTAGGTGCTATTTTATTGGTTTGCACACCTAGTAATGATTAATAGGGATAGTTGGGGGTATTCATATTTGATTGTCAGAGGTGAAATTCTTGGATTTATGAAAGATGAACTTATGCGAAAGCATTTACCAAGGATGTTT	Eukaryota;Stramenopiles;Opalozoa;MAST-12;MAST-12A;MAST-12A_X;MAST-12A_XX;MAST-12A_XX_sp.;	1	0	0	0	0	0	0	0	0	0	0	0	0	0	0	0	0	0	0	0	0	0	0	0	0	0	0	0	0	0	0	0	0	0	0	0	0	0	0	0	0	0	0	0	0	0	0
06e549354d15ec59b3ab574e170d6469	AGCTCCAGAAGCGTATGCTAACGTTGTTGCAGTTAAAAAGCTCGTAGTTGAACGTCTGTCGGTTGGGTCCGTGGGGCGAACGCCTCGCGGGCCGGCCTTTTTCTTTCCTGGCTCTCTCTTTGGGGGGGCCTCGTTCACTGTAAACAAATTGGAGTGCTCCACGCAGGTCGTTGGGACCTGGACAATTGTTATGGGATGATGAGATAGGGCTCGGGCACTATTTTGTCGGTTTGCATGCCTGGGTAATGGTGAATAGGAACAGTTGGGGATATTCGTATTTAGCGGTCAGAGGTGAAATTCTTGGATTCGGGAAAGACGAACAACTGCGAAGGCATTTATCAAAGATGTTT	Eukaryota;Stramenopiles;Sagenista;Labyrinthulomycetes;Thraustochytriales;Thraustochytriaceae;Thraustochytriaceae_X;Thraustochytriaceae_X_sp.;	0.900597	0	0	0	0	0	0	0	0	0	0	0	0	0	0	0	0	0	0	0	0	0	0	0	0	0	0	0	0	0	0	0	72	0	0	0	41	0	0	0	0	0	0	0	0	0	0
06e9544ec907b3c8a4856e279e7a8b28	AGCTCCAATAGTAGATATCAAAATTGTTGCAGTTGAAAAGCTCGTAGTTGAGATTCTGGGAAGTGTCGCTATTCTAGGCTTGACGCAAGTCATTCTAGTTGGTGAGCTTTCCATCTTGTGGATTCCGCGTTGTTCGTTTGTTCGGATGACGTGCCACTCAGTTACTGAGAGCAAATTGGAGTGCTCAAAGCAGGCTATACAGCTTTGAACAATTAAGCTTGGAATAACAATTAACGACTTGTTTGTAATTGTTGGTTGTACATTAACAAGTAATGCTTGAAAGGGAACAGTTGTCGGGGATATTCGTATGAGCAAGTCAGAGGTGAAATTCAAGGATTTTGCTTAGACGAACGACTGCGAAAGCATCTATCCAGCATGTTT	Eukaryota;Stramenopiles;Sagenista;Sagenista_X;Sagenista_XX;Sagenista_XXX;Diplophrys;Diplophrys_marina;	1	0	0	0	0	0	0	0	0	0	0	0	0	0	0	0	0	0	0	0	0	0	0	0	0	0	0	0	0	0	0	0	0	0	0	0	0	0	0	0	0	0	0	0	0	0	0
0703b5f5a0d668ff73a5144eb9f6259f	AGCTCCAGAAGCGTATGCTAACGTTGTTGCAGTTAAAAAGCTCGTAGTTGAACGTCTGTCGGTTGGGTCCGTGGGGCGAATGCTCCGCAGACCGGCCTCTCTTTCTTGGCTCTCTCTTTGGGGGGGCCTCGTTCACTGTAAACAAATTGGAGTGCTCCACGCAGGTCGTTGGGACCTGGACAATTGTTATGGGATGATGAGATAGGGCTCGGGCACTATTTGGTCGGTTTGCATGCCTGGGTAATGGTGAATAGGAACAGTTGGGGATATTCGTATTTAGCGGTCAGAGGTGAAATTCTTGGATTCGGGAAAGACGAACAACTGCGAAGGCATTTATCAAAGATGTTT	Eukaryota;Stramenopiles;Sagenista;Labyrinthulomycetes;Thraustochytriales;Thraustochytriaceae;Thraustochytriaceae_X;Thraustochytriaceae_X_sp.;	0.828539	0	0	0	0	0	0	0	0	0	0	0	0	0	0	0	0	0	0	0	0	0	0	0	0	0	0	0	0	0	0	0	66	0	0	0	0	0	0	0	0	0	0	0	0	0	0
071f8520583706c79494cce2ba5b9f61	AGCTCTAATAGCGTATATTAAAGTTGTTGCAGTTAAAAAGCTCGTAGTTGGATTTTGGGGTCGGGCACGCTGTCGGGCTCTGCTCGGATTGGCATGACCGGCCCTTTCCTTCTGGGGACTGCATTCCTCTTCATTGAGGGGTGTTAGGACGCAGATCGTTTACTTTGAAAAAATTAGAGTGTTCAAAGCAGGCAATCGCTTGAATACATTAGCATGGAATAATGGAATAGGACTCCGGTTCTATTTTGTTGGTTTCTAGGACCGAAGTAATGATTAATAGGGATAGTTGGGGGCGTTTGTATTCCGTTGTCAGAGGTGAAATTCTTGGATTTACGGAAGACAAACTTCTGCGAAAGCATTCGCCAAGGATGTTT	Eukaryota;Hacrobia;Cryptophyta;Cryptophyceae;Goniomonadales;Goniomonadales_X;Goniomonas;Goniomonas_amphinema;	0.88058	0	0	0	0	0	0	0	0	0	0	6	22	0	0	0	0	0	0	0	0	0	0	0	0	0	0	0	0	0	0	0	0	0	0	0	0	0	0	0	0	0	0	0	0	0	0
072863d72f6491ff9e273c6165b38523	AGCTCCAATAGCGTATATTAAAGTTGTTGCAGTTAAAACGCTCGTAGTTGAAACGATACGGTTGTTCAGACGTTCCCAAGTGGTTCGGAAAACGACCGCGGACTCTTCAAGAGTTTCTGTTACTTTGAGAAAAATTGAGTGTTTCAGGCGGGCCAGAGCTGAAATAGTGTACCATGGAATGACGAAGTGGCTGTCTCCCTTTTCCTTTACCTTCGGGTGAGACAGTGCGTGGTTGATAGGAACAATCGGGGGTATTCGTATTGAACAGTCAGAGGTGAAATTCTTAGATTTGTTCAAGACGGACTAATGCGAAAGCATCTACCAAGGATGTTT	Eukaryota;Alveolata;Apicomplexa;Gregarinomorphea;Gregarines_GRE1;Gregarines_GRE1_X;Gregarines_GRE1_XX;Gregarines_GRE1_XX_sp.;	0.998926	0	0	0	0	0	0	0	0	0	0	0	0	0	0	0	0	0	0	0	0	0	0	0	0	0	0	0	0	0	0	0	0	0	0	0	0	0	0	0	0	0	0	0	0	0	0
0729b7f55251ad5cd71938a73928e09d	AGCTCCAATAGCGTATATTAAAGTTGTTGCGGTTAAAAAGCTCGTAGTTGGATTTCTGCTTAGGGTGGCTGGTCCGCCCTCTGGGTGAGTATCTGGCACAGCCTGAGCATTCTTCTTGAAAGCACAACTGCACTTGACTGTGTGGTGTGGTATTGAGAACCTTTACTTTGAGGAAATCAGAGTGTTTCAAGCAGGCGTTTGCCTTGAATACATTAGCATGGAATAATATTATAGGGCCTTGGTTCTATTTTGTTGGTTTCTAGAACTGAGGTAATGATTAATAGGGATAGTTGGGGGCATTCGTATTTAATTGTCAGAGGTGAAATTCTTGGATTTGTTAAAGACGGACTACTGCGAAAGCATTTGCCAAGGATGTTT	Eukaryota;Alveolata;Dinoflagellata;Dinophyceae;Gonyaulacales;Goniodomataceae;Alexandrium;Alexandrium_ostenfeldii;	0.74226	0	0	0	0	0	0	0	0	0	0	0	0	0	0	0	0	0	0	0	0	0	0	0	0	0	0	0	73	0	0	0	0	0	0	0	0	0	0	0	0	0	0	0	0	0	0
072f35225581a82ca82a643961a92c65	AGCTCCAATAGTGTATATTAAAGTTGTTGCAGTTAAAAAGCTCGTAGTTGGATTTCGGAACATTACACATCAAGGTCCATCGAATAAGATGCTGTACCAGTTGTGTAGTTCCTCTTTTTTCGGTTTCGATCTGCATTCTCCTCTCCAGTTAGAGGGTTTGCTGTTATGTTCGTACCGAATATTTTTACTTTGAAAAAATTAGAGTGTTCAAAGCAGGCGTAATTTTGCCTTGAATACATTAGCATGGGATAATGGAAAAGGACTTTGGTCTTATTTTCGTTGGTTTCTGAGGCTGAGGTAATGATTAATAGGGACAGTTGGGGTCAGCTGTATTCTCTTGTCAGAGGTGAAATTCTAAGATTGAGAGAAGACAAACTACTGCGAAAGCATTTGACAAGG…	Eukaryota;Amoebozoa;Lobosa;Tubulinea;Leptomyxida;Rhizamoeba-saxonica-lineage;Rhizamoeba;Rhizamoeba_saxonica;	0.999981	0	0	0	0	0	0	0	0	0	0	0	0	0	0	0	0	0	0	0	0	0	0	0	0	0	0	0	0	0	0	0	0	0	0	0	3	0	0	0	0	0	0	0	0	0	0
0748c0cda9709b8a78a03afaa20da0bf	AGCTCCAATAGCGTATATTAAAGTTGTTGCAGTTAAAAAGCTCGTAGTTGACCTTCTGTGTGTGCCCAGTTCTGGCTTCGGTCAAGCTGTGGTGCTCACATCCGCTTGCAAACCTAGTCCGGCCTTCATTGGTCGACTAGGGGAGTAGGCTTTTTACTTTGAAAAAATTAGAGTGTTTCAAGCAGGCAATGGCTCGAATACATTAGCATGGAATAATGGAATAGGACTTTTGTCCATTTGGTTGGTTATTGGACATGAGTAATGATTAACAGGGACAGTTGGGGGCATTAGTATTTAATTGTCAGAGGTGAAATTCTTGGATTTATTAAAGACTAACTTATGCGAAAGCATTTGCCAAGGATGTTT	Eukaryota;Alveolata;Ciliophora;Oligohymenophorea;Scuticociliatia_1;Philasterida	0.999952	0	0	0	0	0	0	0	0	0	0	0	0	0	0	0	0	0	0	0	0	0	0	0	0	0	0	0	0	0	0	0	0	0	0	0	0	0	0	0	0	0	0	0	0	0	203
074f580dcf3d976a1af5b6cdfe5e4948	AGCTCCAATAGCGTATATTAAAGTTGTTGCAGTTAAAAAGCTCGTAGTTGGATTTCGGCTTGGCTCTGGCGTCCATTTTGGTTCTGCTGGAGTCTGCCAATTTTGGGTGGATGCTGTGTGGCATTAGGTTGTCGTGCAGTGGATGCCCATCGTTTACTGTGAAAAAATTAGAGTGTTCAAAGCAGGCTTACGCCGTTGAATATATTAGCATGGAATAATAAGATAGGTCTTGGATTCTATTTTGTTGGTTTGCGAATCGAAGAAATGATTAATAGGGACAGTTGGGGGTATTCGTATTCCATTGTCAGAGGTGAAATTCATGGATTTCTGGAAGACGAACTACTGCGAAAGCATTTACCAAGGATGTTT	Eukaryota;Stramenopiles;Ochrophyta;Bacillariophyta;Bacillariophyta_X;Raphid-pennate	0.962431	0	0	0	0	0	0	0	0	0	0	0	0	0	0	0	0	0	0	0	0	0	0	0	0	0	0	0	0	0	0	0	0	0	0	0	0	0	0	0	0	0	0	0	0	0	0
076dca4d5f11df7680379aa67f7c766c	AGCTCCAGAAGCGTATATTAAAGTTGTTGCAGTTAAAAAGCTCGTAGTTGAATGTCTGGTATTTTGGCCGTGTGGGTCCGTGGGTTCTCTATTTTGGAGGCTCGTTTGTGTATCCGCATTTTGTGCCTGCCATTTGTCTGAGGAGTTGTGAAAATGATTCCACAGGTTGTTTACTTTGAAAAAATTAGAGTGTTTAAAGCGGGACGTTTGATATGTCCATTGAATACATTAGCATGGAATAATGAGATAGGACTCTGGGCTTATTTTGTTGGTTTCTGAGCGTGGAGTAATGATTGATAGGGACGGTTGGGGGTGCTAGTATTCAAGGGCCAGAGGTGAAATTCTTGGATTCGTTGAAGACTAACTAATGCGAAAGCATTCACCAAGGACGTTC	Eukaryota;Rhizaria;Cercozoa	0.963326	0	0	0	0	0	0	0	0	0	0	0	0	0	0	0	0	0	23	0	0	0	0	0	0	0	0	0	0	0	0	0	0	0	0	0	0	0	0	0	0	0	0	0	0	0	0
07a803531694a711b1ec40df1f97f7b5	AGCTCCAATAGCGTATATTAAAGTTGTTGCAGTTAAAAAGCTCGTAGTTGGATTTGTGGCTGTCACAAGCGGCCTATCACCTAGTGTTAGTGCTTGCTGGTGTCGCCATCCTTGGGTGGAGCCCGTGTGGCATTAGGTTGTCGTGCGGGGGATGCCCATCGTTTACTGTGAGAAAATTAGAGTGTTCAAAGCAGGCTTATGCCGTTGAATATGTTAGCATGGAATAATAAGATAGGACCTCGGTACTATTTTGTTGGTTTGCGCACCGAGGTAATGATTAATAGGGACAGTTGGGGGTATTCGTATTCCATTGTCAGAGGTGAAATTCTTGGATTTCTGGAAGACGAACTACTGCGAAAGCATTTACCAAGGATGTTT	Eukaryota;Stramenopiles;Ochrophyta;Bacillariophyta;Bacillariophyta_X;Raphid-pennate;Psammodictyon;Psammodictyon_sp.;	0.722915	0	0	0	0	0	0	0	0	0	0	0	0	0	0	0	0	0	0	0	0	0	0	0	0	0	0	0	0	0	0	0	0	0	0	0	0	0	0	0	0	0	0	0	0	0	0
07ba238ce939df2f2d43d7a524a80507	AGCTCCAATAGCGTATACGGTCAGTGTTGCAGTTAAAAAGCTCGTAGTTGGATATAAAAGGGGGAAGTAATACTATTTTTATAGTATTATTATCTACTCTTAAATTGATATAGGAAACATCATTAGATGGTTAAATTGAAATATTTAACTTCAATTTCCATATCTTAATTACTTTGAATAAATTAGAGTGTTTAAAACAAATACTTACTTTTCGTTTGTATAGATTAGCATGGGATAATAAAAAATGATTTCTACATTGGACTTTTTTCTTGTATGGTTTAACTTGTATCGCACTTTGTAGAAATAATGATTAATAGGAATGGTTGGGGGTATTCGTATTGAAATGTCAGAGGTGAAATTCATGGATTTTTTCAAGAGGAACATCAGCGAAAGCATTTA…	Eukaryota;Amoebozoa;Lobosa;Discosea-Flabellinia;Dactylopodida;Vexilliferidae;Vexillifera;Vexillifera_tasmaniana;	0.715973	0	0	0	0	0	0	0	0	0	0	0	0	0	0	0	0	0	0	0	0	0	0	0	0	0	0	0	0	0	0	0	0	0	0	0	0	0	0	0	0	0	0	12	10	0	0
07d27c28cd5dba5f820184289a03b6cd	AGCTCTGATAGTATATATTAAAGTTGTTGCAGTTAAAAAGCTCGTAGTTGAAACTTGGGTGCGTAGGGGCGGTCTCTTTTAGAGTACTACCCTGAAACATCTTTCTTTGGTGTAAACTCTTTATTCACTTAAGGAGTGTAAACCAAACATTTACTTTGAAAAAATTAGAGTGTTCAAAGCAGGCCTTTGCTCGAATATATTAGCATGGAATAATAGAATAGGACGTATGGTTCTATTTTGTTGGTTTCTAGGACCGTCGTAATGATTAATAGGGACGGTCGGGGGCATCAGTATTCAGTTGTCAGAGGTGAAATTCTTGGATTTACTGAAGACTAACTACTGCGAAAGCATTTGCCAAGGACGTTT	Eukaryota;Opisthokonta;Fungi;Ascomycota;Saccharomycotina;Saccharomycetales;Galactomyces;Galactomyces_sp.;	0.705228	0	0	0	0	0	0	0	0	0	0	0	0	0	0	0	0	0	0	0	0	0	0	0	0	0	0	0	0	0	0	0	29	0	0	0	0	0	0	0	0	0	0	0	0	0	0
08421cfa4ce6fdf03b791f3fbadf34bc	AGCTCCAGTAGTGTATATCAAAGTTGTTGCGGTTAAAAAGCTCGTAGTTGGATTTCCCGGCAAAATAAGGTGCGGGATGTGGTCATTTGAACTGCGGCCGTGTCTTTTCCGGTGGTTGTGGTCTCCTTCTGGGGGGTTGCGGCATGTACTTTGAACAAATTAGAGTGCTCAAGACAGGCGATTTTTTATTGCTGTGAATAGATTAGCATGGAATACGGGTATAAACTCTCTTCTCGGGATTGTTGTTTTGACGAGGAGGGGGAATGATGGATAGGGACAGGTGTGGGCATTGAGATTGTTACGTCAGAGGTGAAATTCTTAGATCGTAGCAGGATTAGCAGACGCGAAAGCATTTGTCAAGGATGTTT	Eukaryota;Apusozoa;Apusomonadidae;Apusomonadidae_Group-2;Apusomonadidae_Group-2B;Apusomonadidae_Group-2B_X;Apusomonadidae_Group-2B_XX;Apusomonadidae_Group-2B_XX_sp.;	1	0	0	0	0	0	0	20	0	0	0	563	931	0	0	0	0	0	0	0	0	543	0	0	0	0	0	69	0	0	0	0	0	36	0	0	0	0	0	0	0	0	0	20	117	10	70
08562eb1e05357fa67e59012cfa03948	AGCTCCAATAGCATATGTTAAAGTTGTTGCGGTTGAAAAGCTCGTAGTTGGACTTCTGCTGAGGGTCGCTAACCCACCCTCTGGGTGTAGGTCTGGCCTGCCTCAGTATCTTCTCAGAGAATGTAGATGCACTTGACTGTGTGGTGCGCTATCTGGGGCTGTTACTTTGAGGAAATTAGAGTGCTTCAAGCAGGTCGTTGTCCTGAATACATTAGCATGGCATGATAAGTCAGAACCTCTTGTTCTTCTTTGATGGTTTTAGAGCAGAGGGGAGGGTGAATAGGAACAGTTGGGGGTATTCATATTTGACTGTCAGAGGTGAAATTCTTGGATTTGTGAAAGATGGACTACTGCGAAAGCATCTGCCAGAGATGTCTTCATTGATCAAGAACGAAAG	Eukaryota;Alveolata;Dinoflagellata;Dinophyceae;Peridiniales;Peridiniales_X;Bysmatrum;Bysmatrum_gregarium;	0.9997	0	0	0	0	0	0	0	0	0	0	0	0	0	0	0	0	0	0	0	0	0	0	0	0	0	0	0	0	0	0	0	0	0	0	0	0	0	0	0	0	0	0	0	0	0	0
085c06914682a75db3fcdebbafc044e4	AGCTCCAATAGCGTATATTAAATTTGTTGCAGTTAAAAAGCTCGTAGTTGAAATCCTGGTTAGAACTTGTGATGTTGCACTTGGTGCAGCAATCATTTTGCATTTGACCATCTTTGGGGGATATGTAGCTGGCATTAAGTTGTTGGTTGTAGATATCCCATCCTTTACTGTGAAGAAAATAGAGTGCTCAAAGCAGGCTTATGCCAATGAATACATTAGCATGGAATAATAAGATAAGATAGTGATGTTACTTTGTTGGTTTATGTGTCATTATAATGTTTAAGAGGGACTGTTGGGGGTATTTGTATTCCACTGTCAGAGGTGAAATTCTTGGATTTTTGGAAGACACACAACTGCGAAAGCATTTACCAAGGATGTTT	Eukaryota;Stramenopiles;Ochrophyta;Bacillariophyta;Bacillariophyta_X	0.874972	0	0	0	0	0	0	0	0	0	0	0	0	0	0	0	0	0	0	0	0	0	0	0	0	0	0	0	0	0	0	0	210	0	0	0	0	0	0	0	0	0	0	0	0	0	0
088feac823e9957183dfe2ecd7c2b868	AGCTCCAGTAGCGTATATTAAAGTTGTTGCAGTTAAAAAGCTCGTAGTTGGATTTCTGGCGTGTGTCGACGGGTCCGCCGCCCATTGGGCGTGTTGAGTACGTTGTTGATGCTGCCATTTGTTGTTTGTGCGCGTGTAAAAGCGTGGTGCGGACGACCGTTTACTTTGAGAAAATTAGAGTGTTTAAAGCGGGCTTATTGACAGCCGTTGAATATATTAGCATGGAATAATGAGATAGGACTCGTGTCCGATTTTGTTGGTTTTGATGACAAGAGTAATGATTGATAGGGACAGTTGGGGGTGCTAGTATTTGACGGCCAGAGGTGAAATTCTTGGATTCGTGAAAGACTAACTAATGCGAAAGCATTCACCAAGGATGTCT	Eukaryota;Rhizaria;Cercozoa	0.98493	0	0	0	0	0	0	0	0	0	0	0	0	0	0	0	0	0	0	0	79	0	0	0	0	0	0	0	0	0	0	0	0	0	0	0	0	0	0	0	0	0	0	0	0	0	0
089e8975b143d7caeb54e789cff2807c	AGCTCCAATAGTGTATACTAAAGTTGCTGCAGTTAAAAAGCTCGTAGTTGGATTTCGGTTAATAGAGAAATAGTCTACTTCTATAAGTACGCACTGTTTGTCTATTTCCTTCTTTTGACATATACAATTTATTGTGTTGTCAATCTTTTACTTTGAAAAAATTAGAGTGTTCAAAGCAGGCGTAACAAAGCCTTTGAATATATTAGCATGGGATAATGAAATAAGACTTTTTGCCTTATTCTCGTTGGTTCTTAGGGCTAAAGTAATGATTAATAGGGATAGTTGGGGTCATTAGTATTTAATTGTCAGAGGTGAAATTCTAAGATTTATTAAAGACTAACTACTGCGAAAGCATTTGACAAGGATGTTT	Eukaryota;Amoebozoa;Lobosa;Tubulinea;Leptomyxida;Flabellulidae;Paraflabellula	1	0	0	0	0	0	0	0	0	0	0	0	0	0	0	0	0	0	0	0	0	0	0	0	0	0	0	18	0	0	11	0	0	0	0	0	0	0	0	0	0	0	0	0	0	0	0
08bdd0112f0ca0b8cebe70be506d048b	AGCTCCAATAGCGTATATTAAAGTTGTTGCAGTTAAAAAGCTCGTAGTTGGATTTCAGTGCAATATCGTCCAGCCGGTATGCGTAACAGACTCAGTCTTTACGTATATTTGGTTAAAAACTCATCTCTATGAGGGGAATGATTTGTACTTTTTTCTGTGTTTATACAGGCTCGCTTGTATAGATATCAGATACTTTACTTTGAGAAAATTAGAGTGTTTCAAGCAAGCTTTTGCTTTGAATACTGCAGCATGGAATAATATGATAGGACTTCGGCCCTATTTGTTGGTTTCTAGGTCTGAAGTAATGATTAATAGGGACAGTTGGGGGCATTCGTATTTAACAGTCAGAGGTGAAATTCTTGGATTTGTTAAAGACGAACTACTGCGAAAGCATTTGCC…	Eukaryota;Alveolata;Apicomplexa;Coccidiomorphea;Eimeriida	0.92073	0	0	0	0	0	0	0	0	0	0	0	0	0	0	0	0	0	0	0	0	0	0	0	0	0	0	0	0	0	0	0	0	0	0	0	0	25	209	0	0	0	0	0	0	0	0
08e8eea9c991eb73854376cf13946da3	AGCTCCAATAGCGTATACGGTCAGTGTTGCAGTTAAAAAGCTCGTAGTTGGATATAAAAGGGGGGACTATTTATATTTTTATATATTTAGTTACTACTCTTAAATTGATATAGGTAACACATTTATTTGTGATAGTATTGAAATATACTATTTTTTAATTACCATATCTTAATTACTTTGAATAAATTAGAGTGTTTAAAACAAATACTTACTTTTCGTTTGTATAGATTAGCATGGGATAATAAAAAATGATTTCTACATTGGACTTTTTTCTTGTATGGTTTAACTTGTATCGCACTTTGTAGAAATAATGATTAATAGGAATGGTTGGGGGTATTCGTATTGAAATGTCAGAGGTGAAATTCATGGATTTTTTCAAGAGGAACATCAGCGAAAGCA…	Eukaryota;Amoebozoa;Lobosa;Discosea-Flabellinia;Dactylopodida;Vexilliferidae;Vexillifera;Vexillifera_tasmaniana;	0.923504	0	0	0	0	0	0	0	0	0	0	0	0	0	0	0	0	0	0	0	0	0	0	0	0	0	0	0	0	0	0	0	0	0	0	0	0	0	0	0	0	0	0	10	0	0	0
08eeb8f2448a2fce64ba7bbe319af06d	AGCTCCAGTAGCGTATATTAAAGTTGTTGCAGTTAAAAAGCTCGTAGTTGGATTTCTGGCGTGGTGCGCCCGGCCCGACACCGCTAAGGTGTCGAGTGCCGGCGCGCGCCTGCCATCCTTCCGGAGAGCGTGCCTACCCTTCACTGGGCCGGGTACGCGATCTGGATCGTTTACTTTGAAAAAATTAGAGTGTTTAAAGCAGGCTTACGCTTCTGAATACATTAGCATGGAATAATAAGATAGGACTTTGGTTCTATTTTGTTGGTTTCTAGAACTAAAGTAATGATTGATAGGGACAGTTGGGGGTGCTAGTATTTAACGGCCAGAGGTGAAATTCTTGGATTCGTTAAAGACTAACTAATGCGAAAG	Eukaryota;Rhizaria;Cercozoa;Filosa-Granofilosea;Filosa-Granofilosea_X;Massiteriidae;Massisteria;Massisteria_marina;	1	0	0	0	0	0	0	0	0	0	0	0	4	0	0	0	0	0	0	0	0	0	0	0	0	0	0	0	0	0	0	0	0	0	0	0	0	0	0	0	0	0	0	0	0	0	0
08f7e17746db6d10fbc61858b2c0b86e	AGCTCCAATAGCGTATATTAAAGTTGTTGCAGTTAAAAAGCTCGTAGTTGAACTTCTGTACATTCCCGGTGCCGGCTCTTGTCGAACCGTGGAGTGTGCATCCGCTTACAAACTTAGACCGGTCTTCATTGGTCGACTAAGGGAGTAGGCCCTTTACTTTGAAAAAATTAGAGTGTTTCAAGCAGGCAATGGCTCGAATACATTAGCATGGAATAATGGAATAGGACTGAGGTCCATTTGGTTGGTTATTGGACTTTAGTAATGATTAACAGGGACAGTTGGGGGCATTAGTACTTAACAGTCAGAGGTGAAATTCTTGGATTTGTTAAAGACTAACTTATGCGAAAGCATTTGCCAAGGATGTTT	Eukaryota;Alveolata;Ciliophora;Oligohymenophorea;Scuticociliatia_1;Philasterida;Metanophrys;Metanophrys_sinensis;	0.99994	0	0	0	0	0	0	0	0	0	0	0	0	0	0	0	0	0	0	0	0	2413	26	0	37	21	28	15214	20	0	0	31	17	22	28	0	0	19	0	35	55	20	49	0	14	0	38
093dcba0646a0b33eb8a8154b6d277c9	AGCTCCAATAGCGTATATTAAAGTTGTTGCAGTTAAAAAGCTCGTAGTTGGATTTGTGGTTGGAGCGACCGGTCCAGCACAGTGTGCAGGTACTAGGTTGTCTCCGTCCATCCTTGGGTGGAATCTGTGTGGCATTAAGTTGTCGTGCAGGGGATGCCCATCTTTTACTGTGAAAAAAATAGAGTGTTCAAAGCAGGCTTATGCCGTTGAATATATTAGCATGGAATAATGAGATAGGGCTTTGGTACTATTTTGTTGGTTTGCGCACCGAAGTAATGATTAATAGGGACAGTTGGGGGCATTCGTATTCCATTGTCAGAGGTGAAATTCTTGGATTTTTGGAAGACGAACTACTGCGAAAGCATTTGCCAAGGATGTTT	Eukaryota;Stramenopiles;Ochrophyta;Bacillariophyta;Bacillariophyta_X;Araphid-pennate;Grammatophora	0.999724	0	0	0	0	0	0	0	0	0	0	0	0	0	0	0	0	0	0	0	0	0	0	0	0	0	0	0	0	0	0	0	0	0	0	0	0	0	0	0	0	0	0	0	0	0	0
093f5491e667b640c6e52c1a6d72fa2d	AGCTCCAATAGCGTATATTAAAGTTGTTGCAGTTAAAAAGCTCGTAGTTGAATTTCGGGTCCCCGCGCTCGGCGCTTCATTGTGCCGTCGTGGTGTCCCTCCTCGCCGTCAGGCGTCCTTTACTGTGAAAAAATTAGAGTGTTCAAAGCAGGCAATCGCTTGAATACATTAGCATGGAATAATAAGATAGGATCTTGTCTATTTTGTTGGTTGCGGACAACGATAATGATTAATAGGGATAGTTGGGGGTGTCCGTATTGAGCTGTCAGAGGTGAAATTCTTGGATTTGCTCAAGACGAACTACTGCGAAAGCATTCACCAAGGATGTTT	Eukaryota;Stramenopiles;Opalozoa;Bicoecea;Anoecales;Caecitellaceae;Caecitellus	0.882357	0	0	0	0	0	0	0	0	0	0	0	0	0	0	0	0	0	0	0	0	0	0	0	0	0	0	0	0	0	0	11	27	0	0	0	0	0	0	0	0	0	0	0	0	0	0
094dea8a1d25a6c2aac3300abab0aebf	AGCTCCAATAGCGTATATTAAAGCTGTTGCGGTTAAAAAGCTCGTAGTTGGATTTGAGTCTAGTTGCGGCCGGGCTCAGGGCTTTGACTCTGGGGCGGGCGTGTAGACTGTATGCGCGCGGGGAGGCGCAGGGGATTTTCTCTGCGGACTCGTGTGCTTTACTTTGAACAAATTAGAGTGTTTAAAGCAGGCATTTTTTGCCTTGAATACATTAGCATGGAATAACGATTTTGACTGGAGCAGGCATGATGTTGTCTTGATGACTGCGCAGTAATGATGGATAGGGACGGTCGGGGACATTCGTATTGCTCCGTCAGAGGTGAAATTCTTAGATTGGAGGAAGACGAGCTGATGCGAAAGCCTTTGTCAAGGACGTTT	Eukaryota;Apusozoa;Apusomonadidae;Apusomonadidae_Group-1;Apusomonadidae_Group-1_X;Apusomonadidae_Group-1_XX;Amastigomonas;Amastigomonas_debruynei;	0.973275	0	0	0	0	0	0	0	0	0	0	0	0	0	0	0	0	0	0	0	0	0	15	5	21	0	24	160	14	0	0	0	0	0	0	0	0	0	0	14	0	0	13	20	0	18	4543
0955e86a00d5f23638954edd1749497e	AGCTCCAATAGCGTATATTCAAGTTGCTGCAGTTAAAAAGCTCGTAGTTGAATTTTGGTCCTGATTAGGTGGTTTGGTCGCGAGATCAACACTGCCTTGGTCGGGACTTTCCTTCTAGGGAACTAGGGTGCTCTTTGTTGGGTGCTTTAGGGATCTAGGACTGTTACTTTGAAAAAATTAGAGTGTTTAAAACAGGCTTACGCTTGAATACATTAGCATGGAATAACGGAATAGGACTTTGTTTCTATTTTGTTGGTTTTGAGGAACGAAGTAATGATTAATAGGGATAGTTGGGGGCATTAGTATTCCATAGTCAGAGGTGAAATTCTTGGATTTATGAAAGACTAACTTCTGCGAAAGCATTTGCCAAGGATGTTT	Eukaryota;Opisthokonta;Fungi;Chytridiomycota;Chytridiomycotina;Chytridiomycetes;Chytridiomycetes_X;Chytridiomycetes_X_sp.;	0.926613	3	6	0	0	0	0	0	0	0	0	0	0	0	0	0	0	0	0	0	0	0	0	0	0	0	0	0	0	0	0	0	0	0	0	31	0	0	0	0	0	0	0	0	0	0	0
096705a7d120421ef190e3592a8630ae	AGCTCCAATAGCGTATATTAATGTTGTTGCAGTTAAAAAGCTCGTAGTTGAATTTCTGGGTAGTCTTCTTCGTCTGCGGGAAACCGTGTGAACGTCGCTAAGGCTGCTCATCCTCCTGAAGAACCTATGTGGCATTCATTTGTCGTGTAGGGGATCAGGTACTTTACCTTGAAAAAATTAGAGTGTTTCAGGCAGGCAATCGCCGGAATACATTAGCATGGAATAATTGAATAGGACTTCCGGTCTTATTTGTTGGTTTTGTGGACCGAAGTAATGATTAATAGGGATAGTTGGGGGCATTCGTATTTAATTGTCAGAGGTGAAATTCATGGATTTGTTAAAGACGAACTTATGCGAAAGCATTTGCCAAGGATGTTT	Eukaryota;Alveolata;Ciliophora;Ciliophora_X;Ciliophora_XX;Protocruziidae;Protocruzia	1	0	0	0	0	0	0	0	0	0	0	0	0	0	0	0	0	0	0	0	0	0	0	0	0	0	0	0	0	0	0	0	0	0	0	0	0	0	0	0	0	0	0	372	0	5	0
09955cd56461aa7e661d52e49427b3d7	AGCTCCAATAGCGTATATTAAAGTTGTTGCAGTTAAAAAGCTCGTAGTTGGATTTGTGGTGTGTCCTGTCGGTCCGTTGGCTCAGCCAGTGTGTCTGTACGGGTCTGCCTTTCATGGGACTGTTGGCTTTGTGGCATTAGGTTGTCGCATTGTTGATGCCCATCTTTTACTGTGAAAAAATTAGAGTGTTCAAAGCAGGCTTATGCCGTTGAATATATTAGCATGGAATAATGATATAGGACCTTGGTACTATTTTGTTGGTTTGCGCACTGAGGTAATGATTAATAGGGACAGTTGGGGGTATTCGTATTCCATTGTCAGAGGTGAAATTCTTGGATTTTTGGAAGACGAACTACTGCGAAAGCATTTACCAAGGATGTTT	Eukaryota;Stramenopiles;Ochrophyta;Bacillariophyta;Bacillariophyta_X;Raphid-pennate;Nitzschia;Nitzschia_inconspicua;	0.783443	0	0	0	0	0	0	0	0	0	0	0	0	0	0	0	0	0	0	0	0	0	0	0	0	0	0	0	0	0	0	0	0	0	0	0	0	0	0	0	0	0	0	0	0	0	0
09a780807724333a493f8e33b25c35a0	AGCTCCAATAGCGTATATTAAAGTTGTTGCAGTTAAAAAGCTCGTAGTTGGATTTCTGGTGGGAGTGACCGATCCAGACTTGATTGTCTGCGTAGTGAGTTGTCTCCAGCCATCCTTGTGGAGAACTTTTCTTGCATTAATTTGTAGGGATTGGGACCCACATCATTTACTGTGAAAAAATTAGAGTGTTTAAAGCAGGCAATCGCTTGAATACATTAGCATGGAATAATAAGATAGGACTTTGGTACTATTTTGTTGGTTTGCATACCAAATTAATGATCAACAGGAACAGTTTGAGGATATTCGTATGAACATGTCAGAGGTGAAATTCTTGGATTTTGATCAGACGAACTACTGCGAAAGCATTTATCAAGGATGTTTTCATCAATCAAGAACGAAA	Eukaryota;Stramenopiles;Sagenista;Labyrinthulomycetes;Thraustochytriales;Thraustochytriaceae;Labyrinthuloides;Labyrinthuloides_minuta;	0.95293	0	0	0	0	0	0	0	0	0	0	0	0	0	0	0	0	0	0	0	0	0	0	0	0	0	0	0	0	0	0	0	0	0	0	0	0	1	0	0	0	0	0	0	0	0	0
09c9fc9397541734fd8d29d1aee60e5c	AGCTCCAATAGCGTATATTAAAGTTGTTGCGGTTAAAAAGCTCGTAGTTGGAGTTCTGCCAGGTGACGCTCGTCCGCCCAAGTGGTGTGTACAGGGCGTGCATCTGGCCCTTTCAAGGGGAACGTGTCTGCACTTTATTGTGTGGTGCGAGATCCTTGACTTTTACTTTGAGGAAATCAGAGTGTTCCAAGCAGGCTCTCGTCGTGTATAGCTCAGCATGGAATAATAGCATTGGACTTCGTTTCTAAGCTGTTGGTTGCAAGAAGCGAGGTAATGATGAAGAGGGATAGTTGGGGGCATTCGTATTTAACTGTCAGAGGTGAAATTCTTGGATTTGTTAAAGACGGACTACTGCGAAAGCATCTGCCATGGATGTTT	Eukaryota;Alveolata;Dinoflagellata;Syndiniales;Dino-Group-I;Dino-Group-I-Clade-1;Dino-Group-I-Clade-1_X;Dino-Group-I-Clade-1_X_sp.;	1	0	0	0	0	0	0	0	0	0	0	0	0	0	0	0	0	0	0	0	0	0	0	0	0	0	0	0	0	0	0	6	0	0	0	0	0	0	0	0	0	0	0	0	0	0	0
09e7694c21db1f5f57371ac07cd5c61b	AGCTCCAATAGCGTATATTAAAGTTGTTGCAGTTAAAAAGCTCGTAGTTGAAATTCTGGACGTCCGGGTCCCCAGTCTTTAGGCGGGGATACCGGCGTTCATCCGCTTGCAAGCATACGTTCGCCCTTAACCAGGCGGCTATGTGAGTAAGCATTTTACCTTGAGAAAAACAGAGTGTTCCAGGCAGGTTTGTCCGGGATGCATTAGCATGGAATAATAGAACATGACTGAAGTCAAGTTATTGGTTGTAGACTTTAGTAATGATTAATAGGAACAGTCGGGGGCATTCGTACTCAGCAGTCAGAGGTGAAATTCTAAGATTTGCTGAAGACGAACTAATGCGAAAGCATTTGCCAAGGATGTTT	Eukaryota;Alveolata;Ciliophora;Oligohymenophorea;Peritrichia_2;Sessilida;Sessilida_X;Sessilida_X_sp.;	0.891188	0	0	0	0	0	0	0	0	0	0	0	0	0	0	0	0	0	0	0	0	43	0	0	0	0	0	0	0	0	0	0	0	0	0	0	0	0	0	0	0	0	0	17	0	9	212
0a002f7d31b4a42dff8d585a3de755ea	AGCTCCAATAGCGTATATTAAAGTTGTTGCAGTTAAAAAGCTCGTAGTTGAACTTTAGGCAAGGCGACCTGGTCACCCACTGGGTGCACTGGGTTCGCCGCGCCTCACCTTCGGGGAACTAGTCGTGCTTCGGTGCGCTAGGGAACCGAGCCTTACTTTGAAGAAATTAGAGTGTTTAAAGCAGGCTTACGCTTGAATACGCCAGCATGGAATAACAAGATAGGACTTTGGTTCTATTTTGTTGGTTTGAGGACCAAAGTAATGATTAATAGGGCCAGTCGGGGGCATTAGTATTCTATAGTCAGAGGTGAAATTCTTGGATTTATAGAAGACTAACTAATGCGAAAGCATTTGCCAAGGATGTTT	Eukaryota;Opisthokonta;Fungi;Cryptomycota;Cryptomycotina;Cryptomycotina_X;Cryptomycotina_XX;Cryptomycotina_XX_sp.;	1	0	0	0	0	0	0	0	0	0	0	0	0	0	0	0	0	0	0	0	0	0	0	0	0	0	0	0	0	0	0	0	0	0	0	0	0	25	75	0	0	0	0	0	0	0	0
0a2c5e89b3d2455df2e8705d7c4989f6	AGCTCCAATAGCGTATATTAAAGTTGTTGCAGTTAAAAAGCTCGTAGTTGGATTTGTGGCGTACGTTGGGTTCCGGGCACTTGTGTCTGAGTGACTCGCCGTTGCCATCCTTGGGTGGAACCTGTGTGGCATTAGGTTGTCGTGCAGGGGATGCCCATCTTTTACTGTGAAAAAATTAGAGTGTTCAAAGCAGGCTTATGCCGTTGAATATATTAGCATGGAATAATGAGATAGGACTTTTTTGCTATTTTGTTGGTTTGCGCAAAGAGGTAATGATTAATAGGGACAGTTGGGGGTATTCGTATTCCATTGTCAGAGGTGAAATTCTTGGATTTTTGGAAGACGAACTACTGCGAAAGCATTTACCAAGGATGTTTTCATCAATCAAGAACGAAA	Eukaryota;Stramenopiles;Ochrophyta;Bacillariophyta;Bacillariophyta_X;Raphid-pennate;Navicula	0.956752	0	0	0	0	0	0	0	0	0	0	0	0	0	0	0	0	0	0	0	0	0	0	0	0	0	0	0	1	0	0	0	0	0	0	0	0	0	0	0	0	0	0	0	0	0	0
0a5a462d501e4ff0dabb2bff981d75b5	AGCTCCAGAAGCGTATACTAACGTTGTTGCAGTTAAAAAGCTCGTAGTTGAATTTGTTGTAGGAGCGACCTGGCCTTTTGGTGAATGCCAATTGTATTAGCTGTGTGTCTGTCTTCGGCAATTTTTAGAAACGAAAGTTTCTTCTTTCACTGTAAAAAAATTAGAGTGTTTCAAGCAAAACGTAGATTTGGAATATAATAGTATGGAATGATAAGATAGGACTCTTTTACTATTTTGTTGGTTTGTATAAGAGAGTAATGATTAATAGGGACAATTGGGGGTATTCGTATTCAGATGTCAGAGGTGAAATTCTTGGATTTTCGGAAGACGAACAACTGCGAAGGCATTTACCAAGGATGTTT	Eukaryota;Stramenopiles;Sagenista;Labyrinthulomycetes;Thraustochytriales;Thraustochytriaceae;Thraustochytriaceae_X;Thraustochytriaceae_X_sp.;	0.992816	0	0	0	0	0	0	0	0	0	0	0	0	0	0	0	0	0	0	0	0	0	0	0	0	4	0	0	0	5	0	0	0	0	7	0	0	4201	420	17	0	0	0	0	0	0	0
0a6beeba7d7469b8ef560c02b8bfe8d8	AGCTCCAATAGCGTATATTAAAGTTGTTGCAGTTAAAAAGCTCGTAGTTGGATTTCTGGTGATAATGACCATCCATGACTTGATTGTCGTTGTGATGTGTTGTTTATTACCATCCTCGTAGAGATTGTTTCTGGCATTAATTTGTTGGATTCAGGACCTACGTCATTTACTGTGAAAAAATTAGAGTGTTTAAAGCAGGCAATTGGCTTGAATACATTAGCATGGAATAATAAGATAGGACTTTGGTGCTATTTTGTTGGTTTGCACATCAAGGTAATGATTAACAGAATCAGTCGGGGATATTCGTATGCAAATGTCAGAGGTGAAATTCTTGGATTTTTTACAGACGAACTACTGCGAAAGCATTTATCAAGGATGTTT	Eukaryota;Stramenopiles;Sagenista;Labyrinthulomycetes;Labyrinthulales;Labyrinthulaceae;Labyrinthulaceae_X;Labyrinthulaceae_X_sp.;	0.998859	0	0	0	2	0	0	0	0	0	0	0	0	0	0	0	0	0	0	0	0	0	0	0	0	0	0	0	0	0	0	0	0	0	0	0	0	0	0	0	0	0	0	0	0	0	0
0ab4d76f3d0d3dd57f7aad36070478d2	AGCTCCAATAGCGTATATTAAAGTTGTTGCAGTTAAAAAGCTCGTAGTTGAACTTCTGCGTATGCCCGGTTCTGGCTTCGGTCAAGCCGTGGTGTGCGCATCCGCTTGCAAACCTAGTCCGGCCTTCACTGGTCGACTAGGGGAGTAGGCTATTTACTTTGAAAAAATTAGAGTGTTTCAAGCAGGCAATGGCTCGAATACATTAGCATGGAATAATGGAATAGGACTTTTGTCCATTTGGTTGGTTATTGGACATTAGTAATGATTAACAGGGACAGTTGGGGGCATTAGTATTTAATTGTCAGAGGTGAAATTCTTGGATTTATTAAAGACTAACTTATGCGAAAGCATTTGCCAAGGATGTTT	Eukaryota;Alveolata;Ciliophora;Oligohymenophorea;Scuticociliatia_1;Philasterida;Philasterida_X;Philasterida_X_sp.;	0.978908	0	0	0	0	0	0	0	0	0	0	0	0	0	0	0	0	0	0	0	0	0	0	0	0	0	0	0	0	0	0	0	0	0	0	0	0	0	0	0	0	0	0	0	0	0	959
0ab80b375a916b368ed091b0b409bb2b	AGCTCCAGAAGCGTATGCTAACGTTGTTGCAGTTAAAAAGCTCGTAGTTGAAGGTTTGTCGGTTGGGTCTGTGGGGCGAACGCTCCGCAGATCGGCCTTTTTCTTTCCTGGCTCTCTCTTTGGGGGGGCCTCGTTCACTGTAAACAAATTGGAGTGCTCCACGCAGGTCGTTGGGACCTGGACAATTGTTATGGGATGATGAGATAGGGCTCGGGCACTATTTTGTCGGTTTGCATGCCTGGGTAATGGTGAATAGGAACAGTTGGGGATATTCGTATTTAGCGGTCAGAGGTGAAATTCTTGGATTCGGGAAAGACGAACAACTGCGAAGGCATTTATCAAAGATGTTT	Eukaryota;Stramenopiles;Sagenista;Labyrinthulomycetes;Thraustochytriales;Thraustochytriaceae;Thraustochytriaceae_X;Thraustochytriaceae_X_sp.;	0.922022	0	0	0	0	0	0	0	0	0	0	0	0	0	0	0	0	0	0	0	0	0	0	0	0	0	0	0	0	0	0	0	290	0	0	0	0	0	0	0	0	0	0	0	0	0	0
0af6ec2e1da59e11c224b4e553f06778	AGCTCCAATAGCGTATATTAAAGTTGTTGCAGTTAAAAAGCTCGTAGTTGAATTTCTGGTGGGCGCGCCGGTCTTCCATGTGTTGTACTGGGCGCTGTCCGCCATCCTTGTGGAGAGGGCTCGCATTGAGTTGTGGGTCGGATCTGCATCATTTACTGTGAAAAAATTAGAGTGTTTAAAGCAGGCTGTCGCTTGAATACATTAGCATGGAATAATAAGATAGGACTTTGGTCTATTTTGTTGGTTGCGAACCGAGGTAATGATTAATAGGGATAGTTGGGGGTATTCATATTTAATTGTCAGAGGTGAAATTCTTGGATTTATGAAAGATGAACAACTGCGAAAGCATTTACCAAGGATGTTT	Eukaryota;Stramenopiles;Opalozoa;Bicoecea;Bicoecales;Bicoecaceae	0.840057	0	0	0	0	0	0	0	0	0	0	33	75	0	0	0	0	0	0	0	0	90	0	0	0	0	0	6	0	0	0	0	0	0	0	0	0	0	0	0	0	0	0	0	0	0	0
0b1a9096595273606ac1d864fc014ad7	AGCTCCAATAGCGTATATTAAAGTTGTTGCAGTTAAAAAGCTCGTAGTTGGATTTCTGGCATGGGGCGAGGGCGCGCATGTGCGAGGCCCAAGTGCCATGCCATCCTTCTGTTAACCTTTCTTGGCATTCATTTGTTAGTTAGGGGCTCAGATATTTTACCTTGAGAAAATTAGAGTGTTTCAGGCAGGCTCGCGCCGGGATACATTAGCATGGAATAATGGAACAGGACTTTAGCCTCTTCTGTTGGTCTGAGGGGTCGAAGTAATGATTAATAGGGATAGTTGGGGGCATTAGTACTAAACTGTCAGAGGTGAAATTCTCGGATTTGTTTAAGACTAACTTATGCGAAAGCATTTGCCAAGGATGTTT	Eukaryota;Alveolata;Ciliophora;Spirotrichea;Tintinnida	0.995541	0	0	0	0	0	0	0	0	0	0	0	0	0	0	0	0	0	0	0	0	0	0	0	0	0	0	0	0	0	0	0	0	0	0	0	0	0	0	0	0	0	0	0	0	0	0
0b54e4898742104b7f9fd83853c1a3e5	AGCTCCAATAGCGTATATTAATGTTGTTGCAGTTAAAAAGCTCGTAGTTGGATTTGTGGTTGGAGTGGTCGGTCCGACACATTGTGTGGGTACTTGAGCAATCTGTCCATCTTTGGTCTGAATCTTTGTGGCATTAAGTTGTCGTGGAGGGGAGGGCCATCATTTACTGTGAAAAAATCAGAGTGTTCAAAGCAGGCTTATGCCGTTGAATATATTAGCATGGAATAATGAGATAGGACCTCGGTACTATTTTGTTGGTTTGCGCACCGAGGTAATGATTAATAGGGACAGTTGGGGGTATTCGTATTCCATTGTCAGAGGTGAAATTCTTGGATTTCTGGAAGACGAACTACTGCGAAAGCATTTACCAAGGATGTTT	Eukaryota;Stramenopiles;Ochrophyta;Bacillariophyta;Bacillariophyta_X;Araphid-pennate;Licmophora;Licmophora_paradoxa;	0.927515	0	0	0	0	0	0	0	0	0	0	0	0	0	0	0	0	0	0	0	0	0	0	0	0	0	0	0	0	0	0	0	0	0	0	0	0	0	0	0	0	0	0	0	0	0	0
0b55e8f9eac64379af6f45e6bf1cf940	AGCTCCAATAGCGTATACGGTCAGTGTTGCAGTTAAAAAGCTCGTAGTTGGATATAAAAGGGAGGACTATTTATATTTTTATATATTTAGTTACTACTCTTAAATTGATATAGGTGACACATTTATTTGTGATAGTATTGAAATATACTATTTTATCCACCATATCTATATTACTTTGAATAAATTAGAGTGTTTAAAACAAATACTTACTTTTCGTTTGTATAGATTAGCATGGGATAATAAAAAATGATTTCTACATTGGACTTTTTTCTTGTATGGTTTAACTTGTATCGCACTTTGTAGAAATAATGATTAATAGGAATGGTTGGGGGTATTCGTATTGAAATGTCAGAGGTGAAATTCATGGATTTTTTCAAGAGGAACATCAGCGAAAGCATT…	Eukaryota;Amoebozoa;Lobosa;Discosea-Flabellinia;Dactylopodida;Vexilliferidae;Vexillifera;Vexillifera_tasmaniana;	0.924009	0	0	0	0	0	0	0	0	0	0	0	0	0	0	0	0	0	0	0	0	0	0	0	0	0	0	0	0	0	0	0	0	0	0	0	0	0	0	0	0	0	0	44	0	4	0
0b6a00f6cfe365ca157182c057946128	AGCTCCAATAGCGTATATTAAAGTTGTTGCAGTTAAAACGCTCGTAGTTCGATTTCTGTGGGCAGACTCTGGAAAACCCTGCGGGGTGATCCGCGTCTGTTCACATCCTTCTGTTAACCTTGCGGTCTTTCATTAGTCCGCTTGGAGCTCAGATACTTTACCTTGAGGAAATTAGAGTGTTTCAGGCAGGCTTGCGCCGGAATACATTAGCATGGAATAATAGAACAGGACTCCTTTTCATTGTTGGTCTATGATGGGAGTAATGATTAATAGGGATAGTTGGGGGCATTAGTATTTCAGTGTCAGAGGTGAAATTCTTTAATTTCTGAAAGACTAACTTATGCGAAAGCATTTGCCAAGAATGTTT	Eukaryota;Alveolata;Ciliophora;Spirotrichea;Euplotia;Aspidiscidae;Aspidisca;Aspidisca_aculeata;	0.991899	0	0	0	0	0	0	0	0	0	0	0	0	0	0	0	0	0	0	0	0	0	0	0	0	0	0	0	0	0	0	0	0	0	0	0	72	0	0	0	0	0	0	0	0	0	0
0b712880f332349035fe35a3080579d1	AGCTCCAATAGTGTATTTTAATGTTGTTGCAGTTAAAAAGCTCGTAGTTGAATTTCTGATCTTTGGAAACTTTTAGTGAAAGAAGGTCATCCGTCTGGGAACTAAATAAGAGATTTAACCCTCTGTTTAGCAAACAGGCATTTTACCATGAATAAATTAGAGTGTTTCAAGCAAGCGTTCGCTTGAATATTTCAGCATGGAATAATAGAACAGGACAGAATTCTTTTTATTGGTTATTGAATTTTGTAATGATTAAAAGAAACAGTTGGGGGTATTTGTACTTGATAGTCAGAGGTAAAATTCTTAGATTTATCAAAGACAAACTAGTGCGAAAGCATTTGCCAAGGATGTTTTCATCAATCAGAACGAAAGT	Eukaryota;Alveolata;Ciliophora;Phyllopharyngea;Rhynchodia;Hypocomidae;Hypocoma;Hypocoma_acinetarum;	1	0	0	0	0	0	0	0	0	0	0	0	0	0	0	0	0	0	0	0	0	0	0	0	0	0	0	0	0	0	0	0	0	0	0	0	0	0	0	0	0	0	0	0	0	0	0
0b811ee675c0ab2b020cd2b775e3fc59	AGCTCCAATAGTGTATATTAATGTTCCTGCAGTTATTCGATGCTCGTAGTTGGATTTCTGGAGGTGGAGGCTGGATGCCCCGTGTGGGTATTCCTACAACCACTTTCCATCCTTCTGTTAACGATTCTTGGCCTTTATTGGCTGGTTTCGAGCTCAGATACTTTACCTTGAGTAAATTAGAGTGTTTCAGGCAGGCTTGCGCCCGAATACATTAGCATGGAATAATAGAATAGGACTTCGTCTCATTTTGTTGGTTTTATGAACGGAGTAATGATTAATAGGGATAGTTGGGGGCATTAGTATTAAACTGTCAGAGGTGAAATTCTTTAATCAGTTTAAGACTAACTTATGCGAAAGCATTTGCCAAGAATGTTT	Eukaryota;Alveolata;Ciliophora;Spirotrichea;Euplotia;Aspidiscidae;Aspidisca;Aspidisca_steini;	1	0	0	0	0	0	0	0	0	0	0	0	0	0	0	0	0	0	0	0	0	0	0	0	0	0	0	0	0	0	0	0	0	0	0	0	0	0	0	0	0	0	0	0	0	0	4
0b8782b544f4f60a08f2655a1c75f81a	AGCTCCAATAGCGTATATTAAAGTTGTTGCAGTTAAAAAGCTCGTAGTTGAAGATACGAACGTTTACACTAGAACAAAGTTTCCGGTGTCTGCGTTCACTTTTCGCAAAGACAGCCTGGCCCATTAGTTTGGGTCTTGTTTGAGTTGCGTCATTTACTGTGAACAAATTAGGGTGTTTAAAGCAGGCCTACGTTTGAATACACTAGCATGGAATAATAAGATATGATCTTGGTCGTATTTTGTTGGTGACTACCAAGATAATGATTGATAGAAACTGTTGTGGGTATTCGTATGAGCATGTCAGAGGTGAAATTCTTGGATTTTGATCAGACGAACTACTGCGAAAGCATTTACCAAGGATGTTT	Eukaryota;Stramenopiles;Sagenista;Labyrinthulomycetes;Labyrinthulales;Labyrinthulaceae;Labyrinthula;Labyrinthula_sp.;	0.999971	0	0	0	35	0	0	0	0	0	20	0	0	0	0	0	0	0	0	0	0	8	0	0	0	13	0	0	0	0	0	0	0	0	0	97	56	0	0	0	0	0	0	0	0	51	6
0b8f721ced71e95d2743ef0ee7805e5c	AGCTCCAATAGCGTATACGGTCAGTGTTGCAGTTAAAAAGCTCGTAGTTGGATTTAGGAAGGAATATAAAGAGATATTTTTTAAATGAATAATTTAAAAAATATTTCATCCTTTCAAAATATCCTTACTTTAGTAAGGATTAATTTACTTTGAATAAATTAGAGTGTTTCAAACAAATTTCTTTTAATAGAAATAATATGAATAGATTAGCATGGGATAATAAAATAAGATTTTTCTTGGCACTTTTTTAGTATAGTTGTGAGAAGAAAAATAATGATTAATAGGAACGGTTGGGGGTATTCGTATTGAATTGTCAGAGGTGAAATTCATGGATTTATTCAAGACGAACATCAGCGAAAGCATTTACCAAAGACGTTT	Eukaryota;Amoebozoa;Lobosa;Discosea-Flabellinia;Dactylopodida;Vexilliferidae;Vexillifera;Vexillifera_tasmaniana;	0.819414	0	0	0	0	0	0	0	0	0	0	0	0	0	0	0	0	0	0	0	0	0	0	0	13	0	0	0	0	0	0	0	0	87	0	0	0	0	0	0	0	0	0	0	0	0	0
0baacdf37b6d440716906d4e2bd17bb1	AGCTCCAAAAGGATATATCAACGTTGTTGCAGTTAAAAAGCTCGTAGTTGAATTTCGGGTGGGAATGATGTTGCGCCTTTTGAGGATGTAAATTCTTAAGGGATGTGGCCGCCCGCTCTATTGTGGAATGAATATTTTGTTTGCTAGTTTACTCTAGTAGATGAGATACCACTCTGTCACTGAGAGCAAATTGGAGTGCTCAAAGCAGGCTTGATAGCTTTGAACATTTTAGCTTGGAATGACAAGATATGACTTTTGTTTTATTTTGTTGGTTATGAAATAAAAGTAATGATTAACAGGAACAGCGCGGAGGTATCCGTATTGAAAGGTCAGAGGTGAAATTCTTGGATTCCTTCAAGACGAACAACTGCGAAAGCATTTACCAAGGATGTTT	Eukaryota;Stramenopiles;Sagenista;Labyrinthulomycetes;Thraustochytriales;Thraustochytriaceae;Thraustochytriaceae_X;Thraustochytriaceae_X_sp.;	0.999658	0	0	0	0	0	0	0	0	0	0	786	62	0	0	0	0	0	0	0	0	0	0	0	0	0	0	0	0	0	0	0	0	0	0	0	0	0	0	0	0	0	0	0	0	0	0
0bc82c3c786cfb3fcd12fe5fe70f32e6	AGCTCCAATAGCGTATATTAACGTTGTTGCAGTTAAAAAGCTCGTAGTTGGATTTCTGACATGGCGCGCCCTACCTGAACTATGTTCTTCGTTGGTGCGCACCGGTCATCCTTCAAGAGAACGTCTCTGCCATTAGTTTGGTTGGAGGCAGGATCTTGATCGTTTACTTTGAACAAAATAGAGTGTTTAAGGCAGGCTTATGCCGTGAATAATTCAGCATGGAATAATGAGATAGGACTTCGGTCCCATTTTGTTGGTTTCCAGGACTGAAGTAATGATTGATAGGGATAGTTGGGGGTGCTAGTATTGAACGGCCAGAGGTGAAATTCTTGGATTCGTTCAAGACTAACGTATGCGAAAGCATTCGCCAAGGATGTCT	Eukaryota;Rhizaria;Cercozoa;Endomyxa;Reticulosida;Filoretidae;Filoreta;Filoreta_japonica;	0.999997	0	0	0	0	0	0	0	0	0	0	0	0	0	0	0	0	0	0	0	0	0	0	0	0	0	0	0	0	0	0	0	10	144	0	0	0	0	0	0	0	0	0	0	0	0	0
0bdfcdec3e5c9d22eb3f88945ab21a45	AGCTCCAATAGCGTATATTAAAGTTGTTGCAGTTAAAAAGCTCGTAGTTGGATTTCTGGTAGGAGCGACCATACCGGACTTGATTGTCCGTGTAATGCGTTGTCTCCAGCCATCCTCGTGGAGAATGTTTCTGGCATTAATTTGTCGGATTCGGGACCCGCGTCGTTTACTGTGAAAAAATTAGAGTGTTTAAAGCAGGCAATTGGCTTGAATACATTAGCATGGAATAATAAGATAGGACTTTGGTGCTATTTTGTTGGTTTGCACATCAAGGTAATGATTAACAGAATCAGTCGGGGATATTCGTATGCAAATGTCAGAGGTGAAATTCTTGGATTTTTTACAGACGAACTACTGCGAAAGCATTTATCAAGGATGTTTTCATTAATCAAGAACGAA…	Eukaryota;Stramenopiles;Sagenista;Labyrinthulomycetes;Labyrinthulales;Labyrinthulaceae;Labyrinthulaceae_X;Labyrinthulaceae_X_sp.;	0.982128	0	0	0	0	0	0	0	0	0	0	0	0	0	0	0	0	0	0	1	0	0	0	0	0	0	0	0	0	0	0	0	0	0	0	0	0	0	0	0	0	0	0	0	0	0	0
0c02493a952a1ce07b34a10d15e6d3c3	AGCTCCAATAGCGTATATTAAAGTTGTTGCAGTTAAAAAGCTCGTAGTTGGATTTCTGGTAGGAGCGACCATACCGAGCTTGATTGTTCGTGTAATGTGTTGTCTCCAGCCATCCTCGTGGAGAGTGTTTCTGGCATTAATTTGTTGGAGGCAGGACCCGCGTCGTTTACTGTGAAAAAATTAGAGTGTTCAAAGCAGGCAATTGGCTTGAATATATTAGCATGGAATAATAAGATAGGACTTTGGTGCTATTTTGTTGGTTTGCACATCAAGGTAATGATTAATAGAATCAGTCGGGGATATTCGTATGCAAATGTCAGAGGTGAAATTCTTGGATTTTTTACAGACGAACTACTGCGAAAGCATTTATCAAGGATGTTT	Eukaryota;Stramenopiles;Sagenista;Labyrinthulomycetes;Labyrinthulales;Labyrinthulaceae;Labyrinthulaceae_X;Labyrinthulaceae_X_sp.;	0.998129	0	0	0	0	0	0	0	0	0	0	0	90	0	30	158	24	12	44	27	33	27	0	0	853	15	0	0	57	639	0	60	0	32	0	10	21	0	0	0	0	204	13	123	20	27	20
0c02c1bc7f107317176ac57685b79278	AGCTCCAATAGCGTATATTAAAGTTGTTGCAGTTAAAAAGCTCGTAGTTGGATTTCTGGTAGAAGCGACCATGCCGGGCTTGATTGTCCGTGTAATGTGTTGTCTTCAGCCATCCTCGTGGAGAGCATTTCTGGCATTAATTTACCGGAGGTGGGACCCACGTCATTTACTGTGAAAAAATTAGAGTGTTTAAAGCAGGCAATTGGCTTGAATACATTAGCATGGAATAATAAGATAGGACTTTGGTGCTATTTTGTTGGTTTGCACATCAAGGTAATGATTAACAGAATCAGTCGGGGATATTCGTATGCAAATGTCAGAGGTGAAATTCTTGGATTTTTTACAGACGAACTACTGCGAAAGCATTTATCAAGGATGTTT	Eukaryota;Stramenopiles;Sagenista;Labyrinthulomycetes;Labyrinthulales;Labyrinthulaceae;Labyrinthulaceae_X;Labyrinthulaceae_X_sp.;	0.991262	0	0	0	0	0	7	0	0	0	0	0	0	0	0	0	0	0	7	13	11	0	0	0	0	0	0	0	0	0	0	0	0	0	0	0	0	0	0	0	0	0	0	0	0	0	0
0c266db63bd2da9ce4cb5168dd1b182e	AGCTCCAGTAGCGTATATTAAAGTTGTTGCAGTTAAAAAGCTCGTAGTTGAATTTCTGGTAGAGCCGACCTCTCTTTGGGTTTTGCCCATTGTTAGTTGCGTTGTGCTTGGCCATCCTGCCCTTTTTTGAAAAGGGCTCGTTTACTGTAAAAAAATTAGAGTGTTTCAAGCAAAAAGTATTTTGGAATATATTAGTATGGGATAATAAGATAGGACTTTGGTGCTATTTTGTTGGTTTGCCGCTGAAGTAATGATTAAAAGGAACGGTTGGGGGTATTCGTATTTATGAGTCAGAGGTGAAATTCTTGGATTTCAGAAAGACGAACTACTGCGAAAGCATTTATCAAGGATGTTT	Eukaryota;Stramenopiles;Sagenista;Labyrinthulomycetes;Thraustochytriales;Thraustochytriaceae;Thraustochytriaceae_X;Thraustochytriaceae_X_sp.;	0.932411	0	0	0	0	0	0	0	0	0	0	38	868	6	0	6	0	0	0	0	0	14	0	0	0	0	0	0	0	0	0	0	0	14	0	0	0	0	0	0	0	0	0	22	31	0	116
0c34929eee6e26a4efecf00111bb7f7e	AGCTCCAGTAGCGTATATTAATACTGTTGCAGTTAAAAGGCTCGTAGTCGAACTTTTGGAAATGTTTTTTGGAGCCATGTGTCTAGTACACATTGAGTTGCATAAGTTTTCATCCTTTTGGAAATTGTTTCTGCTCTTGATTGAGTTAGTTTTGAATTCCAGATCATTTACTGTGAGTTAATCAAAGTGTTCAAAGCGGATGGAAGTCCAGAATGCTGCAGCATGGAATAATACTATAGAACTTGGTTTTTATTTGTTGGCTTCTAGAATCGAAGTAATGATTGAAAGAGGTGGTTGGGGGTGCTAGTATTTAACGGTCAGCGGTGAAATGCATAGACCCGTTAAAGACTCACTAAAGCGAAAGCATTCACCAAGGATATTT	Eukaryota;Rhizaria;Cercozoa;Endomyxa;Vampyrellida;Vampyrellida_X;Vampyrellida_XX;Vampyrellida_XX_sp.;	1	0	0	0	0	0	0	0	0	0	0	0	0	0	0	0	0	0	0	0	0	0	0	0	0	0	0	0	0	0	0	0	0	0	0	0	17	0	0	0	0	0	0	0	0	0	0
0c9f56781dbf7c7e2702dfff289465e7	AGCTCCAATAGCGTATATTAAAGTTGTTGCAGTTAAAAAGCTCGTAGTTGAATTTCTGGGACGGGCGCCGGTCCACCTGCTTTGCGGGTGCGTACTTTGGTTTTATGTAAGATCCGTCTCATTCTTGCGCGGTGCCGTGCCTGGCCTTGATTGGTGTGGGTGCGGTGTTTTACTCCGCGCATCGATTACTGTGAACAAATTAGAGTGTTTAAAGCAGGCTGTTAAGCTTGAATACATTAGCATGGAATAATGACATAGGACTTTGGTTCTATTCGTTGGTGTGGTACTGAAGTAATGATTAATAGGGATAGTTGGGGGTATTCATATTTGATTGTCAGAGGTGAAATTCTTGGATTTATTAAAGATGAACAACTGCGAAAGCATTTACCAAGGATGTTT	Eukaryota;Stramenopiles;Opalozoa;Bicoecea;Bicoecales;Bicoecaceae	0.990602	0	0	0	0	0	0	0	0	0	0	0	0	0	0	0	0	0	0	0	0	0	0	0	0	0	0	0	0	0	0	0	0	0	0	0	8	0	0	0	0	0	0	0	0	0	0
0cad4a9abf593c2190f075b7f2e57860	AGCTCCAATAGCGTATATTAAAGTTGTTGCGGTTAAAAAGCTCGTAGTTGGATTTCTGCCGAGGGCGACCGGTCCGCCCTCTGGGTGAGTATCTGGCTCGGCCTGGGCATCTTCTTGGAGAGTGTATCTGCACTTGACTGTGTGGTGCAGTATCCAGGACTTTTACTTTGAGGAAATTAGAGTGTTTCAAGCAGGCACACGCCTTGAATACATTAGCATGGAATAATAAGATAGGACCTTGGTTCTATTTTGTTGGTTTCTAGGGCTGAGGTAATGATTAATAGGGATAGTTGGGGGCATTCGTATTTAACTGTCAGAGGTGAAATTCTTGGATTTGTTAAAGACGGACGACTGCGAAAGCATTTGCCAAGGATGTTT	Eukaryota;Alveolata;Dinoflagellata;Dinophyceae;Peridiniales;Blastodiniaceae;Blastodinium	0.999704	0	0	0	0	0	0	0	0	0	0	0	0	0	0	9	0	0	0	0	0	0	0	0	0	0	0	0	0	0	0	0	0	0	0	0	0	0	0	0	0	0	0	0	0	0	0
0cc8608bc4547f6649f5e031bda31bb8	AGCTCCAATAGCGTATATTAAAGTTGTTGCAGTTAAAAAGCTCGTAGTTGAATTTCTGTACAATCATAGCATTGACTCGCGTCTTTCTATTGATTGTGCATTCGTTTGCAAACCTAGAATGTTCTTGATTGAATATCTAGGCGAGTAATCTTTTTACTTTGAAAAAATTAGAGTGTTTCAGGCAGGCAATGGCTCGAATACATTAGCATGGAATAATGGAATAGGACTTTTGTTCATTTTATTGGTTATTGGACTTAAGTAATGATTAAAAGGGACAGTTGGGGGCATTAGTATTTAATAGTCAGAGGTAAAATTCTTGGATCTATTAAAGACTAACTTATGCGAAAGCATTTGCCAAGGATGTTT	Eukaryota;Alveolata;Ciliophora;Oligohymenophorea;Scuticociliatia_1;Philasterida;Uronema;Uronema_heteromarinum;	1	0	0	0	0	0	0	0	0	0	0	0	0	0	0	0	0	0	0	0	0	0	0	0	0	0	0	0	0	0	0	0	0	0	0	0	0	0	0	0	0	0	0	19	0	0	423
0d1a66dbe04c351de81e9be0d1a06c80	AGCTCCAATAGCATATATTAATGTTGCTGCAGTTAAAAAGCTCGTAGTTGGATCTGTGGTTGCAAGAGTGTCCCTAGGGGATGATTTTGCTGAACCATCCATGAGATACAGCTTCTTTGGCATTAGGTTGTTAAAGATGTTGAGTTTGTATTGTACTGTGAAGAAAGTAGAGTGCTCTACACAGGTGATAGCTGTTGGATAAAATAGCATGGAATACTGGAGTAAGACACTGGTGTTAGTTGTTGGTTTGTGCATTGCTGTAATGGTTAACAGGGCTAGTTGGGGGTATATGTATTCCATTGTAAGAGGTGAAATTCTTGGATTTCTGGAAGACGAACGAATGCGAAAGCATTTACCATGGATGTTT	Eukaryota;Stramenopiles;Ochrophyta;Bacillariophyta;Bacillariophyta_X	0.903754	0	0	0	0	0	0	0	0	0	0	0	0	0	0	0	0	0	0	0	0	0	0	0	0	0	0	0	0	0	0	8	23	0	0	0	0	0	0	0	0	0	0	0	0	0	0
0d2fd5b8e2dab135b06606426a3197bc	AGCTCCAATAGCGTATATTAAAGTTGTTGCAGTTAAAAAGCTCGTAGTTGGATTTGTGGCTTTCGGTGTGTTCCAGGCACTTGTGTCTGAGTAACCTGCTGATGCCATCCTTGGGTGGAACCTGTGTGGCATTAGGTTGTCGTGCAGGGGATGCCCATCATTTACTGTGAAAAAATTAGAGTGTTCAAAGCAGGCTTATGCCGTTGAATATATTAGCATGGAATAATGAGATAGGACTTTTTTGCTATTTTGTTGGTTTGCGCAAAGAGGTAATGATTAATAGGGACAGTTGGGGGTATTCGTATTCCATTGTCAGAGGTGAAATTCTTGGATTTTTGGAAGACGAACTACTGCGAAAGCATTTACCAAGGATGTTT	Eukaryota;Stramenopiles;Ochrophyta;Bacillariophyta;Bacillariophyta_X;Raphid-pennate;Navicula	0.992459	0	0	0	0	0	0	0	0	0	0	0	0	0	0	0	0	0	0	0	0	0	0	0	0	0	0	0	0	0	0	0	0	0	0	0	0	0	0	0	0	0	0	0	15	0	0
0d492fc7f0c7cc0da0a0b9679fdf5720	AGCTCCAATAGCGTATATTAAAGTTGTTGCAGTTAAAAAGCTCGTAGTTGGATTTGTGGCGTACGGTGGGTCCCGGGCACTTGTGCCTGAGCGACTTGCCGTTGCCATCCTTGGGTGGAACCTGTGTGGCATTAGGTTGTCGTGCAGGGGATGCCCATCATTTACTGTGAAAAAATTAGAGTGTTCAAAGCAGGCTTATGCCGTTGGATATATTAGCATGGAATAATAAGATAGGACTTCTTCGCTATTTTGTTGGTTTGCGCGAGGAGGTAATGATTAACAGGGACAGTTGGGGGTATTCGTATTCCATTGTCAGAGGTGAAATTCTTGGATTTCTGGAAGACGAACTACTGCGAAAGCATTTACCAAGGATGTTT	Eukaryota;Stramenopiles;Ochrophyta;Bacillariophyta;Bacillariophyta_X;Raphid-pennate;Navicula;Navicula_perminuta;	0.999974	0	0	0	0	0	0	0	0	0	33	0	0	0	0	0	0	0	0	0	0	0	0	0	0	0	0	0	0	0	0	0	0	0	0	0	0	0	0	0	0	0	0	0	0	0	0
0d7cf3072474d02689bfae4d2fea5995	AGCTCCAGTAGCGTATATTAAAGCTGTTGCAGTTAAAAAGCTCGTAGTTGGATTTGTGGCTTGTGCCGAGGCGTCCATTCGTTTGGTTCTGCCTTGGCCGTGCCATCCTTGGGTGGAATCTGTGTGGCATTAGGTTGTCGTGCAGGGGATGCCCATCGTTTACTGTGAAAAAATTAGAGTGTTCAAAGCAGGCTTATGCCGTTGAATATATTAGCATGGAATAATAAGATAGGTCTAGGGTCCTATTTTGTTGGTTTGCGGTCCTTAGAAATGATTAACAGGGACAGTTGGGGGTATTCGTATTCCATTGTCAGAGGTGAAATTCTTGGATTTCTGGAAGACGAACTACTGCGAAAGCATTTACCAAGGATGTTT	Eukaryota;Stramenopiles;Ochrophyta;Bacillariophyta;Bacillariophyta_X;Raphid-pennate;Fistulifera;Fistulifera_saprophila;	0.962034	0	0	0	0	0	0	0	0	0	0	0	0	0	0	0	0	23	0	0	0	0	0	0	0	0	0	0	0	0	0	0	0	0	0	0	0	0	0	0	0	0	0	0	0	0	0
0d94b94a081d3d76ced8a5e1fdd8d750	AACTCCAAGAGTGTATCTTAATGTTGCTGCAGTTAAAAAGCTCGTAGTTGAACTTCTGGCTGTTGAGTCCGCAAATGCGTGGACTCGGCAGTCATCCGCTAGGAGAAGTAGTATTTCTGTCAAAGGTTTTACTACGGACCCAGCATTTTACTTTGAAGAAATTAGAGTGTTCCTGGCAGGCTAAGCTTGCATATATTAGCATGGAATAATGGAATAGGACCTTTTCTGTTTCATTGGTTGACAGATAGGTAATGATTAACAGGGACAGTCGGGGGCATTCGTACTCAGTGGCTAGAGGTGAAATTCTTAGATTCGCTGAAGACGAACTAATGCGAAAGCATTTGCCAAGGATGTTT	Eukaryota;Alveolata;Ciliophora;Phyllopharyngea;Cyrtophoria_4;Chilodonellidae;Pseudochilodonopsis;Pseudochilodonopsis_fluviatilis;	0.995076	0	65	0	214	0	771	0	19	4	2158	81	0	0	0	0	0	0	12	5	34	0	0	0	0	13	0	0	7392	8	0	0	0	0	11	0	289	6	0	8	0	0	0	6	0	0	8
0da434f6d65a391743e0af86f05cce6a	AGCTCCAATAGCGTATATTAAAGTTGTTGCAGTTAAAACGCTCGTAGTTCGATTTCTGTGGGCGGACTCTGGAAAACCCTGCGGGGTGATCCGCGTCCGTTCACATCCTTCTGTTAACCTTATCGGCTTTCACTAGTCGGTTTGGAGCTCAGATACTTTACCTTGAGGAAATTAGAGTGTTTCAGGCAGGCTTGCGCCGGAATACATTAGCATGGAATAATAGAACAGGACTCCTTTTCATTGTTGGTCTATGATGGGAGTAATGATTAATAGGGATAGTTGGGGGCATTAGTATTTAATTGTCAGAGGTGAAATTCTTTGATTTGTTAAAGACTAACTTATGCGAAAGCATTTGCCAAGAATGTTT	Eukaryota;Alveolata;Ciliophora;Spirotrichea;Euplotia;Aspidiscidae;Aspidisca;Aspidisca_aculeata;	0.995739	0	0	0	0	0	0	0	0	0	0	0	0	0	0	0	0	0	0	0	0	0	0	0	0	0	0	0	0	0	0	0	0	0	0	0	0	0	0	0	0	9	0	0	0	0	0
0dbb29026d85af3b3ccc703838cd0e03	AGCTCCAATAGCGTATATTAAAGTTGTTGCAGTTAAAAAGCTCGTAGTCGGACTTCTGGCGGCAGAGTCTCGGTCCGCCGCAAGGTGTGCACTGGACTCGGTCGCCATCCTTCTCGAGGAGTGGATGTGCCCTTAATTGGGTGGGTTCACGACTCGGGACCTTTACTTTGAAAAAATCAGCGCGTTCAAAGCAGGCTTAAAGCTTGAATGTACTAGCATGGAATAATAGAATAGGACTTTGGTCTTATTTTGTTGGTTTCTAAGACCGAGGTAATGATTAATAGGGATAGTTGGGGGCATTCGTATTTAATTGTCAGAGGTGAAATTCTTGGATTTATGAAAGACGAACATCTGCGAAAGCATTTGCCAAGGATGTTT	Eukaryota;Opisthokonta;Choanoflagellida;Choanoflagellatea;Craspedida;Monosigidae_Group_A;Choanoeca;Choanoeca_perplexa;	0.999999	0	0	0	0	0	0	0	0	0	0	0	0	0	0	0	0	0	0	0	0	0	0	0	0	0	0	0	0	42	0	0	0	0	0	0	0	0	0	0	0	0	0	0	0	0	0
0dc5ff984cd9073cbd000b28df8fb5f8	AGCTCCAATAGTGTATATTAACGTTGCTGCAGTTAAAAAGCTCGTAGTTGAATTTCTGGGGGGCTGCCTTACCCACGGGTATGTGCGGCCACCTCATCCGCGCCGGAAGGCACTACAGTATTACTTAGTGTTGGATGCGTGTTTTACTTTGAAGAAATTAGAGTGTTCCAGGCAGGCTTTGCTTGAATACATCAGCATGGAATAATGGAATAGGACAGGTCAATTTAAATTGGTTATTTGACTTGTAATGATTAACAGGGACAGTTGGGGGCGTTTGTATTCAATAGTCAGAGGTGAAATTCTTGGATTTGTTGAAGACAAACTAATGCGAAAGCATTCGCCAAGGATGTTT	Eukaryota;Alveolata;Ciliophora;Phyllopharyngea;Cyrtophoria_8;Dysteriidae;Trochilia	1	0	0	0	0	0	0	0	0	0	0	0	0	0	0	0	0	0	0	0	0	0	0	0	13	0	0	0	0	0	0	0	0	0	0	0	0	0	0	0	0	0	0	0	0	0	0
0dd5423e396c9a9d59676d7e09d218bf	AGCTCCAATAGCGTATATTAAAGTTGTTGCAGTTAAAAAGCTCGTAGTTGGATTTCTGGTTGAAGTCGATAGCGCACTTGTGTGAGGCTTGAGACTTTTGCCATCCTTCTGTTAACCTTCTCGACATTGATTTGTCGGTTTGGGGCTCAGATATTTTACCTTGAGAAAATTAGAGTGTTTCAGGCAGGCTTGTGCCCGGATACATTAGCATGGAATAATAGAATAGGACTTTAGCCTCTTCTGTTGGTCTGAGGGGTTGGAGTAATGATTAATAGGGATAGTTGGGGGCATTAGTACTTAACTGTCAGAGGTGAAATTCTCGGATTTGTTAAAGACTAACTTATGCGAAAGCATTTGCCAAGGATGTTT	Eukaryota;Alveolata;Ciliophora;Spirotrichea;Tintinnida;TIN_07;Tintinnopsis_07	0.999998	0	0	0	0	0	0	0	0	0	0	0	0	0	0	0	0	0	0	0	0	0	0	0	0	0	0	0	0	0	0	0	0	0	0	0	0	0	0	0	0	0	0	0	0	0	0
0e0249c5a6a9eb24410e96241990caae	AGCTCCAATAGCGTATATTAAAGTTGTTGCAGTTAAAAAGCTCGTAGTTGGACTTCTGGGAGGATGTAGTTGTCCGCCTTCACGGTGTGTGCAACAACGCCCTCTCATCCTTCTGTCAACGCGGCTTCGGGATTCACGTCTCGGTCGCGCGATCAGATATTTTACCTTGAGAAAATTAGAGTGTTTCAGGCAGGCTTGGTCCGGAATACATTAGCATGGAATAATAGAATAGGACTCCAGTCTCTTTGTTGGTTTCCGAGTTTGGAGTAATGATTAATAGGGATAGTTGGGGGCATTAGTATTTAATTGTCAGAGGTGAAATTCTCGGATTTGTTAAAGACTAACTTATGCGAAAGCATTTGCCAAGGATGTTT	Eukaryota;Alveolata;Ciliophora;Spirotrichea;Hypotrichia;Urostylidae;Tunicothrix	0.819724	0	0	0	0	0	0	0	0	0	0	0	0	0	0	0	0	0	0	0	0	0	0	0	0	0	0	0	0	0	0	0	0	0	0	0	0	0	0	0	0	0	0	0	0	0	0
0e04982e40c5bae6dc42fd16f8ecc6d6	AGCTCTAATAGCGTATACTTATGTTGTTGCGGTTAAAAAGCTCGTAGTTGGATTTTGGGGCTTGGCCATCGGTCCGGTGTAAGCCGCGCACTGATGGCTGGGCTCTTCTGTCTGAGGGTGGTTGTGGTGCTTCACTGTGCTGCGACTGTTTTCAGACCTTCACTTTGAACAAATTAGAGTGTTTAAAGCAGGCTTACGCCTTGAATACATTAGCATGGAATGAACATATAGGACTTTGGTTCTATTTTGTTGGTTTTAAGGACCAAAGTAATGATTAATAGGGATAGTTGGGGGCATTAATATTTAATTGTCAGAGGTGAAATTCTTAGATTTATGAAAGATTAACTTCTGCGAAAGCATTTGCCAAGGATGTTT	Eukaryota;Apusozoa;Apusomonadidae;Apusomonadidae_Group-1;Apusomonadidae_Group-1_X;Apusomonadidae_Group-1_XX;Apusomonadidae_Group-1_XXX;Apusomonadidae_Group-1_XXX_sp.;	0.861289	0	0	0	0	0	0	0	0	0	0	0	0	0	0	0	0	0	0	0	0	0	0	0	0	0	0	0	0	0	0	0	0	0	0	0	0	0	0	0	0	0	0	0	0	0	0
0e1b8e1ec85b1a59fa036b5aead799c2	AGCTCCAATAGCGTATATTAAAGTTGTTGCAGTTAAAAAGCTCGTAGTTGGATTTCTGGCAGGAGTGACTGACCACAAACTCTGTTTGTGAGTTGTGTCATTCTGGCCATCCTTGGTAAGATCCTTTTTGGCATTAAGTTGTCGGGAAGGGGATGACCATCGTTTACTGTGAAAAAATTAGAGTGTTTAAAGCAGGCTTATGCCGTTGAATATATTAGCATGGAATAATAAGATAGGACTTTGAGTCTATTTTGTTGGTTTGCGAGTCAAAGTAATGATTAATAGGGACAGTTGGGGGTATTCGTATTTCATTGTCAGAGGTGAAATTCTTGGATTTCTGAAAGACGAACTACTGCGAAAGCATTTACCAAGGATGTTT	Eukaryota;Stramenopiles;Ochrophyta;Bacillariophyta;Bacillariophyta_X;Polar-centric-Mediophyceae;Skeletonema;Skeletonema_marinoi;	0.997454	0	0	0	0	0	0	0	0	0	0	0	0	26	4	0	0	0	0	11	0	0	0	0	0	0	0	0	0	0	0	0	0	0	0	0	0	0	0	0	0	0	0	0	0	0	0
0e1eb5790ea3bfb32f95f0f230c0fc24	AGCTCCAATAGCGTATATTAATGTTGTTGCAGTTAAAAAGCTCGTAGTTGAATTTCTGGAATGAACTTTCGGTCCGAGGCCTTGTGTCTTGCGTACTGTTCTTGTTCATCCCATCTTAGTAGTGAGTGTTACTGGCATTCGGTTGTCGGTTGCAGGAGCTGCTTCGTTTACTGTGAATAAAATAGAGTGTTTAAAGCAGGCATTACGCCTTGAATACTTCAGCATGGAATAAAATTATAGGACTTAGGTGCTATTTTATTGGTTTGCACACCTAGTAATAATTAATAGGGATAGTTGGGGGTATTCATATTTGATTGTCAGAGGTGAAATTCTTGGATTTATGAAAGATGAACTTATGCGAAAGCATTTACCAAGGATGTTTTCATCAATCAAGAACGA…	Eukaryota;Stramenopiles;Opalozoa;MAST-12;MAST-12A;MAST-12A_X;MAST-12A_XX;MAST-12A_XX_sp.;	1	0	0	0	0	0	0	0	0	0	0	0	0	0	0	0	0	0	0	0	0	0	0	0	0	0	0	0	0	0	0	0	0	0	0	0	0	0	0	0	0	0	0	0	0	0	0
0e37a77ea1b56c697e86e589d798d311	AGCTCCAATAGCGTATATTAATGTTGTTGCAGTTAAAAAGCTCGTAGTTGGATTTCTGCGTCGCGCAGCTCGGTCCGCGGCACTGCCGTGTGACTGTGGCTGGAGCGTCGCTTCCTTGTGGAGACTGTTTCTGTCATTAATTTGGTGGATTCCGGAACCGCATCGTTTACTGTGAAAAAATTAGAGTGTTCAAAGCAGGCTTATGCCGTGAATACATTAGCATGGAATAATAAGATAGGACTTTGGTTCTATTTTGTTGGTTGGAGGCCAAGGTAATGATTAATAGGGATAGTTGGGGGTATTCATATTTAATTGTCAGAGGTGAAATTCTTGGATTTATGAAAGATGAACTTATGCGAAAGCATTTACCAAGGATGTTT	Eukaryota;Stramenopiles;Opalozoa;MAST-3;MAST-3J;MAST-3J_X;MAST-3J_XX;MAST-3J_XX_sp.;	1	0	0	0	0	0	0	0	0	0	0	0	0	0	0	0	0	0	0	0	0	19	0	0	0	0	0	0	0	0	0	0	0	0	0	0	0	0	0	0	0	0	0	0	0	0	0
0e79aec5164fa674d727d5e56d55e683	AGCTCCAGTAGTGTATATCAAAGTTGTTGCGGTTAAAAAGCTCGTAGTTGGATTTCCCGGGATTTTGGGTGTGGGATGTGGTCATTTGAACTGCGGCCATGGCTTTACCGGTGGTTGTGCGACCTTTTTGGGGCGTACGGCATGTACTTTGAACAAATTAGAGTGCTCAAGACAGGCGATTTTTTATTGCTGTGAATAGATTAGCATGGAATACGGGTATAAACTCTCTTCTCGGGATTGTTGTTTTGACGAGGAGGGGGAATGATGGATAGGGACAGGTGTGGGCATTGAGATTGTTACGTCAGAGGTGAAATTCTTAGATCGTAGCAGGATTAGCAGACGCGAAAGCATTTGTCAAGGATGTTT	Eukaryota;Apusozoa;Apusomonadidae;Apusomonadidae_Group-2;Apusomonadidae_Group-2B;Apusomonadidae_Group-2B_X;Apusomonadidae_Group-2B_XX;Apusomonadidae_Group-2B_XX_sp.;	1	0	0	0	0	0	0	0	0	0	0	0	0	0	0	0	0	0	0	0	0	0	0	0	0	0	0	0	0	0	0	0	0	0	0	0	0	0	0	0	0	0	0	40	0	0	109
0e942924a5d78583ebe5c6f6712ad9f3	AGCTCCAATAGCGTATATTAAAGTTGTTGCAGTTAAAAAGCTCGTAGTTGGATTTCTGGTGGGGGTTGCTAGTCCGGGGCGAAAGCCCTGTGACCGATGCGTACCTACCGCCATCCTCGGAGGGCCTGCGTGTGGGGGTTCGCCTTCGTGCGTAGCGCGCTCCGTCGTTTACTGTGAAAAAATTAGAGTGTTCAAAGCAGGCTTCTAGCCATTGAATACATTAGCATGGAATAATGAGATAGGACCTCGGTGGTCTATTTTGTTGGTTTGCACGCCGAGGTAATGATTAATAGGGATAGTTGGGGGTATTCGTATTCTATTGTCAGAGGTGAAATTCTTAGATTTATGGAAGACGAACTACTGCGAAAGCATTTACCAAGGATGTTT	Eukaryota;Stramenopiles;Ochrophyta;Pinguiophyceae;Pinguiochrysidales;Pinguiochrysidaceae	0.829874	0	0	0	0	0	0	0	0	0	0	0	0	0	0	0	0	0	0	0	0	0	0	0	0	4	0	0	0	14	0	0	0	0	0	0	0	0	0	0	0	0	0	0	0	0	0
0eb426191f92cd742caee330194ea053	AGCTCCAATAGCGTATATTTAAGTTGTTGCAGTTAAAAAGCTCGTAGTTGGATTTCGGGTGGGCTGCGCCGGTCCGCCGTTTCGGTGTGCACTGGCGTGGCCCACCTTGCTGCCGGGGACGGGCTCCTGGGCTTCACTGTCCGGGACTCGGAGTCGGCGAGGTTACTTTGAGTAAATTAGAGTGTTCAAAGCAGGCCTACGCTCTGAATACATTAGCATGGAATAACACGATAGGACTCTGGCCTATCTCGTTGGTCTGTGGGACCGGAGTAATGATTAAGAGGGACAGTCGGGGGCATTCGTATTTCATTGTCAGAGGTGAAATTCTTGGATTTATGAAAGACGAACTTCTGCGAAAGCATTTGCCAAGGATGTTT	Eukaryota;Archaeplastida;Chlorophyta;Trebouxiophyceae;Chlorellales;Chlorellales_X	0.810855	0	0	0	0	0	0	0	0	0	0	0	0	0	0	0	0	0	0	0	0	0	0	0	0	0	0	0	0	0	6	0	0	0	0	0	0	0	0	0	0	0	0	0	0	0	0
0ef5e583e54b94f3b228823d50400d96	AGCTCCTAAAGTGTATACTAACGTTGTTGCAGTTAAAAAGCTCGTAGTTGAACTATTGGTGTGGGTGAATGTTGGCCCTTTGGATGTATTGTCCATTGTTGTTGCTACTTTACCTTGCCATCTTGGATTTTCTTTTTCTTTAGGAGATCCTCTTTCACTGTAAAAAAATTAGGGTGTTCCAAGCAGATTGTAATTGGTCGGAATATTTCAGTATGGGATGATAAGATAAGCTGTTGTTGCTATTTTGTTGGTTTGTACAATAACAGAATGATTAACAGGGACAGTTGGGGGTATTCGTATTTAGATGTCAGAGGTGAAATTCTTGGATTTTCGAAAGACGAACTACTGCGAAAGCATTTACCAAGGATGTTT	Eukaryota;Stramenopiles;Sagenista;Labyrinthulomycetes;Thraustochytriales;Thraustochytriaceae;Thraustochytrium;Thraustochytrium_sp.;	0.846248	0	0	0	0	0	0	0	0	0	0	0	0	0	0	0	0	0	0	0	0	12	0	0	0	0	0	0	0	0	0	0	0	0	0	0	0	0	0	0	0	0	0	0	0	0	0
0efa46b023cac6653117cf9f14747cca	AGCTCCAATAGCGTATATTAAAGTTGTTGCAGTTAAAAAGCTCGTAGTTGGATTTCTTGGAGGGTGCCAATGTCCGCTACGGCGTGCGCAGCGGCGCCCTTCCATCCTTCTGTTAACGCCTCTTGGCATTCGTTTGCTGGTGGCGGGCTCAGATATTTTACCTTGAGAAAATTAGAGTGTTTCAGGCAGGCTAGGCCGGAATACATTAGCATGGAATAATGGAATAGGACTATGGTCTCTTTGTTGGTTTGAGGGACTGCAGTAATGATTAATAGGGACAGTTGGGGGCATTAGTATTTAATTGTCAGAGGTGGAATTCTCAGATTTGTTAAAGACTAACTTATGCGAAAGCATTTGCCAAGGATGTTT	Eukaryota;Alveolata;Ciliophora;Spirotrichea;Strombidiida	0.967001	0	0	0	0	0	0	0	0	0	0	0	0	0	0	0	0	0	0	0	0	0	0	0	0	0	0	0	0	0	0	0	0	0	0	0	0	0	0	0	0	0	0	0	0	0	0
0efb3ba6bc22f57d57cf0ab2276aee4a	AACTCCAAGAGTGTATCTTAATGTTGCTGCAGTTAAAAAGCTCGTAGTTGAACTTCTGGCTGTTGAGTCCGCAAATGCGTGGACTCGGCAGTCATCCGCTAGGAGACGTAGTATTTCTGTCAAAGGTTTTACTACGGACCCAGCATTTTACTTTGAAGAAATTAGAGTGTTCCTGGCAGGCTAAGCTTGCATATATTAGCATGGAATAATGGAATAGGACCTTTTCTGTTTCATTGGTTGACAGATAGGTAATGATTAACAGGGACAGTCGGGGGCATTCGTACTCAGTGGCTAGAGGTGAAATTCTTAGATTCGCTGAAGACGAACTAATGCGAAAGCATTTGCCAAGGATGTTT	Eukaryota;Alveolata;Ciliophora;Phyllopharyngea;Cyrtophoria_4;Chilodonellidae;Pseudochilodonopsis;Pseudochilodonopsis_fluviatilis;	0.991608	0	0	0	0	0	0	0	0	0	0	0	0	0	0	0	0	0	0	0	0	0	0	0	0	0	0	0	138	0	0	0	0	0	0	0	0	0	0	0	0	0	0	0	0	0	0
0f02c9ed73e4d5a45e45e40b05e41a43	AGCTCCAATAGCGTATATTAATGCTGCTGCAGTTAAAAAGCTCGTAGTCGAATTTCTGGTCTGTCAAACCCGAACTGCTTTCTTTCGAGAGGCATGTCTCGATCAGTTTGCGGACCATCCTTCTGAAAAAAGTTTCTACCATTAAATTGGTTGGTTACTGGATTCAGATCGTTTACTGTGAGCAAATGGGAGTGTTCAAAGCAAGCTTTTTGCATGCCTGAACCGTTTAGCATGGAATAATAAAATTGAACTGTGGTTTTTTTTTGTTGGCTAAAAACCCATGTTATGATCAATAGGGATAGTTGGGGGTGCTCATATTTAGGGGGTAGCGGTGAAATGCGATGATCCTCTGAAGATGAACTAATGCGAAAGCATTCACCAAGGATATCT	Eukaryota;Rhizaria;Cercozoa;Endomyxa;Vampyrellida;Penardia-lineage;Penardia-lineage_X;Penardia-lineage_X_sp.;	0.999749	0	0	0	0	0	0	0	0	0	0	0	0	0	0	0	0	0	0	0	0	0	0	0	0	0	0	0	0	0	0	0	0	0	0	0	0	0	0	0	0	0	0	0	0	0	0
0f11c7d3cf0fe0fa5d5f5dca1af4f3f4	AGCTCCAATAGCGTATATTAATGCTGCTGCAGTTAAAAAGCTCGTAGTCGAATTTCTGGTCTGTCAAACCCGAACTGCTTTCTTTCGAGAGGCATGTCTCGACCAGTTTGCGGACCATCCTTCTGAAAAAAGTTTCTACCATTAAATTGGTTGGTTACTGGATTCAGATCGTTTACTGTGAGCAAATGGGAGTGTTCAAAGCAAGCTTTTTGCATGCCTGAACCGTTTAGCATGGAATAATAAAATTGAACTGTGGTTTTTTTTTGTTGGCTAAAAACCCATGTTATGATCAATAGGGATAGTTGGGGGTGCTCATATTTAGGGGGTAGCGGTGAAATGCGATGATCCTCTGAAGATGAACTAATGCGAAAGCATTCACCAAGGATATCT	Eukaryota;Rhizaria;Cercozoa;Endomyxa;Vampyrellida;Penardia-lineage;Penardia-lineage_X;Penardia-lineage_X_sp.;	0.999787	0	0	0	0	0	0	0	0	0	0	0	0	0	0	0	0	0	0	0	0	0	0	0	0	0	0	0	0	0	0	0	0	0	0	0	0	0	0	0	0	0	0	0	0	0	0
0f23b33a486e5f75c9992f1e7626658e	AGCTCCAATAGCATATATTAAAGTTGTTGCAGTTAAAAAGCTCGTAGTTGAATTTCTGTCTGTTACGCGCTCGAAGCCATTTGGCGACGGACGCGTGCAGGCATTCTTCTACTCCTGGGGTAACTCAGTGCGGTAGAGCCTTTACTTTGAGAAAATTAGAGTGTTTCAAGCAAGCATCGCTTTGAATACTACAGCATGGAATAATACAATAGGACTTTAGGCCTATTTGTTGGTTTCAGGCCTGAAGTAATGATTAATAGGGACAGTTGGGGGCATTCGTATTGGACAGTCAGCGGTGAAATGCGATGATTTGTTCAAGACGAACTACTGCGAAAGCATTTGCCAAAGATGTTT	Eukaryota;Alveolata;Apicomplexa;Colpodellidea;Colpodellida;Colpodellaceae;Colpodella;Colpodella_sp.;	1	0	0	0	0	0	0	0	4	0	0	718	27	0	0	0	0	0	0	0	6	0	0	0	0	0	0	0	0	0	0	0	0	0	0	0	0	0	0	0	0	0	0	0	0	0	0
0f6006390e5dc16e50915a24e3bdc2c8	AGCTCCAATAGCGTATATTAAAGTTGTTGCAGTTAAAAAGCTCGTAGTTGAAGATTTGGCTAACGGACCACCACAAAGTGGAGGGTCCTGTGTCGATTATCACAAAGAAGCTTTTGCGCATTAATTTGTGCTCTAGCCGAGATGTGTCCTTTACTGTGAACAAATTAGGGTGTTTAAAGCAGGCTAACGTTTGAATACACTAGCATGGAATAATAAGATATGACTCCTGTTGCATATGCTGGTGGCTATGGGAGTAATGATTGACAGGAACAGTCGTGGGTATTCGTATGAGCATGTCAGAGGTGAAATTCTTGGATTTTGATCAGACGAACTACTGCGAAAGCATTTACCAAGGATGTTT	Eukaryota;Stramenopiles;Sagenista;Labyrinthulomycetes;Labyrinthulales;Labyrinthulaceae;Labyrinthula;Labyrinthula_sp.;	0.909258	0	0	0	0	0	0	0	0	0	0	0	0	0	0	0	0	0	0	0	0	0	0	0	0	0	0	0	0	31	0	0	0	0	0	0	0	0	0	0	0	0	0	0	0	0	0
0f6171fc6e35db148af35df9bc17e701	AGCTCCAATAGCGTATATTAAAGTTGTTGCAGTTAAAAAGCTCGTAGTTGGATCTCGGATCCCGGCTCGCGGTCCTCCTCACGGTGGGTTCCGGGCACTTGTTGTCTGAGTAACTTGCTGTTGCCATCCTTGGGTGGAACCTGTGTGGCATTAGGTTGTCGTGCAGGGGATGCCCATCATTTACTGTGAAAAAATTAGAGTGTTCAAAGCAGGCTTATGCCGTTGAATATATTAGCATGGAATAATGAGATAGGACTTTTTTGCTATTTTGTTGGTTTGCGCAAAGAGGTAATGATTAATAGGGACAGTTGGGGGTATTCGTATTCCATTGTCAGAGGTGAAATTCTTGGATTTTTGGAAGACGAACTACTGCGAAAGCATTTACCAAGGATGTTT	Eukaryota;Stramenopiles;Ochrophyta;Bacillariophyta;Bacillariophyta_X;Raphid-pennate;Navicula	0.994181	0	0	0	0	0	0	0	0	0	0	0	0	0	0	0	0	0	0	0	0	0	0	0	0	0	0	0	0	0	0	0	0	0	0	0	0	0	0	0	0	0	0	0	0	0	0
0f7925c2f1e7e40b463162380eb6f08d	AGCTCCAATAGCGTATATTAATGTTGTTGCAGTTAAAAAGCTCGTAGTTGGATTTCGAATGGGAGCGTCTGGTCGGCTCCGCAAGGGGTCGCAACCGAGGTTGTCTCCGGTTCTATTTCGGGGTTATTTCTTGGTCATGGCATTGGTTTGTCGTGGCTGAGTCCCGTCGTTTACTGTGAACAAATTAGAGTGTTCCAAGCAAGGCTTGACTTGAATACATTAGCATGGAATAATAAGATAGGACTTTGGTGGTTCTGCCCTTTTCTTTCGGGGGGAGGGTGGATATTTTGTTGGTTTGCACGCCAAAGTAATGATTAATAGGAGCAGTTGGGGGTATTCGTATTCAATTGTCAGAGGTGAAATTCTTGGATTTCTAGAAGACGAACTACTGCGAAAGCA…	Eukaryota;Stramenopiles;Ochrophyta;Dictyochophyceae;Dictyochophyceae_X;Rhizochromulinales;Rhizochromulina	0.703849	0	0	0	0	0	0	0	0	0	0	0	0	0	0	0	0	0	0	0	0	0	0	0	0	0	88	0	0	0	0	0	0	0	0	0	0	0	0	0	0	0	0	0	0	0	0
0fab80474d430cd43afb35eba7ed5560	AGCTCCAATAGCGTATCTTAATGTTGTTGCAGTTAAAAAGCTCGTAGTCGAACCTCTGGGCCGGGCCGGCGTCCCCTGGACTGCCAACGTCCGAGTTCATCCGTCTGGGGACTTGTTTGCAGTTTGCTCTGCGGCATGCACAACCAGGCATTTTACTTTAAGGAAATTAGAGTGTTTCAAGCAGACTTTCGTTTGAATGCATTAGTATGGAATAATAGAAAAGGACTACTTTTATTTTATTGGTACATTAGAAGTAGTAATGATTAACAGGAACAGTTGGGGGCATTCGTATTTAGTAGTTAGAGGTGAAATTCTTGGATTTACTAAGGACGAACTAATGCGAAAGCATTTGCCAAGGATGTTT	Eukaryota;Alveolata;Ciliophora;Phyllopharyngea;Cyrtophoria_2;Lynchellidae_1;Chlamydonellopsis;Chlamydonellopsis_calkinsi;	0.937024	0	0	0	0	0	0	0	0	0	0	0	0	0	0	0	0	0	0	0	0	0	0	0	231	0	0	0	0	0	0	0	0	0	0	0	0	0	0	0	0	0	0	0	0	0	0
0fca1d0ed54ae9a5610cf815e0c93ba2	AGCTCCAATAGCGTATATTAAAGTTGTTGCAGTTAAAAAGCTCGTAGTTGGATTTCTGGTGGGAGCGACCGTTCCGGACTTGATTGTCTGTGTATTGAGTTGTCTCCAGCCATCCTTGTGGAGAACTTTTCTTGCATTAATTTGTAGGGATTGGGACCCACATCATTTACTGTGAAAAAATTAGAGTGTTTAAAGCAGGCAATCGCTTGAATACATTAGCATGGAATAATAAGATAGGACTTTGGTACTATTTTGTTGGTTTGCATACCAAATTAATGATCAACAGGAACAGTTTGAGGATATTCGTATGAACATGTCAGAGGTGAAATTCTTGGATTTTGATCAGACGAACTACTGCGAAAGCATTTATCAAGGATGTTT	Eukaryota;Stramenopiles;Sagenista;Labyrinthulomycetes	1	0	0	0	0	0	0	0	0	0	0	0	0	0	0	0	0	0	0	0	0	0	0	0	0	0	0	0	0	0	0	0	0	0	0	0	0	0	0	266	0	0	0	0	0	0	0
1011328ca8ce88341e9da9ee3070449f	AGCTCCAATAGTGTATACTAATGTTGCTGCAGTTAAAAAGCTCGTAGTTGGATTTCGGTTAATAAGATGCTAGTCTACTTTTTTATAAGTACGCACTGTCATTTTATTTCCTTCTTTTCAGTAACAAAATTTATTTTGTTCTGAATTATTTACTTTGAAAAAATTAGAGTGTTCAAATCAGGCGTATTTTGCCTTTGAATATATTAGCATGGGATAATGAAATAAGACTTTTTGCCTTATTCTCGTTGGTTTTTGAGGCTAAAGTAATGATTAATAGGGATAGTTGGGGTCATTAGTATTTAATTGTCAGAGGTGAAATTCTAAGATTAATTAAAGACTAACTACTGCGAAAGCATTTGACAAGGATGTTT	Eukaryota;Amoebozoa;Lobosa;Tubulinea;Leptomyxida;Flabellulidae;Paraflabellula;Paraflabellula_hoguae;	0.775351	0	0	0	0	0	0	0	0	0	0	0	0	0	0	0	0	0	23	0	0	0	0	0	0	0	0	0	0	0	0	0	0	0	0	0	0	0	0	0	0	0	0	0	0	0	0
102a3e4a55673905feb569939cb15fe8	AGCTCCAATAGCGTATATTAAAGTTGTTGCAGTTAAAAAGCTCGTAGTTGAAACTTGGGATTGGGAGTCTGGTCCACCTCACGGTGCGTACTGGAACTCTTGATTCTTTTTGCCTGGACGTCTGTTGCGTTTAACCGCGTGGCAGAAAGGTCAGGCCATTTACTGTGAGAAAATTAGAGTGTTCAAAGCAGGCGTTTCGCTCGAATATATTAGCATGGAATAATAGAATAGGACGTATGGTTCTATTTTGTTGGTTTCTAGGACCGTCGTAATGATTAATAGGGACAGTCGGGGGCATCAGTATTCAATAGTCAGAGGTGAAATTCTTGGATTTATTGAAGACTAACTATTGCGAAAGCATTTGCCAAGGATGTTT	Eukaryota;Opisthokonta;Fungi;Ascomycota;Saccharomycotina;Saccharomycetales;Candida;Candida_sorbophila;	0.99997	0	0	0	0	0	0	0	0	0	0	0	0	0	0	0	0	0	0	0	0	0	0	0	0	0	0	0	0	0	0	0	0	0	0	0	0	17	0	0	0	0	0	0	0	0	0
105c8d23bfc0295aa64664713c76674a	AGCTCCAATAGCGTATATTAAAGTTGTTGCAGTTAAAAAGCTCGTAGTTGAACTTCAGACCTGGCTGGGCGGTCCGCTTAACGGCGTGTACTGTCTGGCTGGGCCTTACCTCTTGGTGAGCCGGCGTGTCCTTTATTGGATGCGTCGGGGAACCAGGACTTTTACCTTGAGAAAATTAGAGTGTTCAAAGCAGGCCTATGCCCGAATACATTAGCATGGAATAATAAAATAGGACGTGCGGTTCTATTTTGTTGGTTTCTAGAGTCGCCGTAATGATTAATAGGGATAGTTGGGGGCATTGGTATTGAGTCGCTAGAGGTGAAATTCTTGGATTGACTCAAGACCAACTATTGCGAAAGCATTTGCCAAGGATGTTT	Eukaryota;Opisthokonta;Fungi;Basidiomycota;Agaricomycotina;Agaricomycetes	0.999968	0	0	0	0	0	0	0	0	0	0	0	0	0	0	0	0	0	0	0	0	0	0	0	0	0	0	0	0	0	0	0	0	0	0	0	0	7	0	0	0	0	0	0	0	0	0
10869e5f0e8994a40feaaafbf0967da9	AGCTCCAATAGCGTATATTAAAGTTGTTGCGGTTAAAAAGCTCGTAGTTGGAGTTCTGCCAGGTGACGCTCGTCCGCCCAAGTGGTGTGTACAGGGCGTGCATCTGGCCCTTTCAAGGGGAACGTGTCTGCACTTCATTGTGTGGTGCGAGATCCTTGACTTTTACTTTGAGGAAATAAGAGTGTTCCAAGCAGGCTCTCGTCGTGCATAGCTCAGCATGGAATAATAGCATTGGACTTCGTTTCTACGCTGTTGGTTGCAAGAAGCGAGGTAATGATGAAGAGGGATAGTTGGGGGCATTCGTATTTAACTGTCAGAGGTGAAATTCTTGGATTTGTTAAAGACGGACTACTGCGAAAGCATCTGCCATGGATGTTT	Eukaryota;Alveolata;Dinoflagellata;Syndiniales;Dino-Group-I;Dino-Group-I-Clade-1;Dino-Group-I-Clade-1_X;Dino-Group-I-Clade-1_X_sp.;	1	0	0	0	0	0	0	0	0	0	0	0	0	13	0	0	0	0	0	0	0	0	0	0	0	0	0	0	0	0	0	0	0	0	0	0	0	0	0	0	0	0	0	0	0	0	0
108ba958ffde55db4f03d73925e907b1	AGCTCCAGAAGCGTATATTAAAGTTGTTGCAGTTAAAAAGCTCGTAGTTGAATGTCTGGTATTTTGGCCGTGTGGGTCCGTGGGTTCTCCTTTTTGGAGGCTCGTTTGTGTATCCGCATTTTGTGCCTGCCATTTGTCTGAGGAATCTTACGATTCCACAGGTTGTTTACTTTGAAAAAATTAGAGTGTTTAAAGCGGGACGTTTGATATGTCCATTGAATACATTAGCATGGAATAATGAGATAGGACTCTGGGCTTATTTTGTTGGTTTCTGAGCGTGGAGTAATGATTGATAGGGACGGTTGGGGGTGCTAGTATTCAAGGGCCAGAGGTGAAATTCTTGGATTCGTTGAAGACTAACTAATGCGAAAGCATTCACCAAGGACGTTC	Eukaryota;Rhizaria;Cercozoa	0.974678	0	0	0	0	0	0	0	0	0	0	0	0	0	0	0	0	0	0	0	0	0	0	0	0	0	0	0	0	0	0	0	2	0	0	0	0	0	0	0	0	0	0	0	0	0	0
108d8a5bfa623c23e6e3a4161532461e	AGCTCCAATAGCGTATATTAAAGTTGTTGCTGTTAAAAAGCTCGTAGTTGGACTTGTGGCGTTGTTGTCGGTCCAATTTTGGCACTGTTGGCAACGCCATCCTTGGGTGGATCCCGTGTGGCATTAGGTTGTCGTGCAGGGGATGCCCATCGTTTACTGTGAAAAAATTAGAGTGTTCAAAGCAGGCTTACGCCGTTGAATATATTAGCATGGAATAATGAGATAGGACCTTGGTACTATTTTGTTGGTTTGCGCACCAAGGTAATGATTAATAGGGACAGTTGTGGGTATTCGTATTCCATTGTCAGAGGTGAAATTCTTGGATTTCTGGAAGACGCACGAATGCGAAAGCATTTACCAAGGATGTTT	Eukaryota;Stramenopiles;Ochrophyta;Bacillariophyta;Bacillariophyta_X;Raphid-pennate	0.998436	0	0	0	0	0	0	0	0	0	0	0	0	0	0	21	0	0	0	0	0	0	0	0	0	0	0	0	0	0	0	0	0	0	0	0	0	0	0	0	0	0	0	0	0	0	0
109fdce484de52ccef8ca6221df85914	AGCTCCAATAGCGTATATTAAAGTTGTTGCAGTTAAAAAGCTCGTAGTTGGATTTCTGGTAGGAGCGACCGTGCCGAACTTGATTGTTCGTGTATTGTGTTGTCTTCAGCCATCCTCGTGGAGAACTTTTCCGGCATTAATTTGTCGGGATTGGGACCCGCGTCGTTTACTGTGAAAAAATTAGAGTGTTTAAAGCAGGCAATCGCTTGAATACATTAGCATGGAATAATAAGATAGGACTTTGGTACTATTTTGTTGGTTTGCATACCAAATTAATGATCAACAGGAACAGTTTGAGGATATTCGTATGAACATGTCAGAGGTGAAATTCTTGGATTTTGATCAGACGAACTACTGCGAAAGCATTTATCAAGGATGTTT	Eukaryota;Stramenopiles;Sagenista;Labyrinthulomycetes;Labyrinthulales;Labyrinthulaceae;Aplanochytrium;Aplanochytrium_sp.;	0.999974	0	20	0	0	0	0	0	0	0	0	0	0	37	0	0	0	0	0	0	0	0	0	0	0	0	503	0	0	445	0	0	0	0	0	0	0	0	0	0	0	0	0	192	0	0	0
10c887d11312ead9021eec3c30f7ad69	AGCTCCAATAGCGTATATTAATGTTGTTGCAGTTAAAAAGCTCGTAGTTGAATTTAGGAGGGTTAACCTTCCTGTCTGCACTCCTCATGGCAACTGATATTGCTATGTGGAACAGACTTTTACTGTGAGAAAACTAAAGTGCTCAAAGCAGGCTAACGCTTGAATATTAAAGCATGGAATAATAAAATAGGACTTAATTCTATTATTGGTCATTGGATTAAGTAATGATTAACAGAAACAGTTGGGGGCATTCGTATTTAATTGTCAGAGGTGGAATTCTTGGATTAATTAAAGACGAACTAGTGCGAAAGCATTTGCCAAGGATGTTTTCATTAATCAAGAACGAAAG	Eukaryota;Alveolata;Ciliophora;Phyllopharyngea;Suctoria;Ephelotidae;Ephelota;Ephelota_gigantea;	0.977661	0	0	0	0	0	0	0	0	0	0	0	0	0	0	0	0	0	0	0	0	0	0	0	0	0	0	0	17	0	0	0	0	0	0	0	0	0	0	0	0	0	0	0	0	0	0
10cd85a02935982f12a83a22a8633f2f	AGCTCCAATAGCGTATATTAAAGTTGTTGCAGTTAAAAAGCTCGTAGTTGGATTTCTGGTAGGAGTGACCGTTCCGAACTTGATTGTTCGTGTATTGTGTTTTCTCCAGCCATCCTTGTGGAGAACTTTTCTTGCATTAATTTGTAGGGATTGGGACCCGCATCGTTTACTGTGAAAAAATTAGAGTGTTTAAAGCAGGCAATCGCTTGAATACATTAGCATGGAATAATAAGATAGGACTTTGGTACTATTTTGTTGGTTTGCATACCAAATTAATGATCAACAGGAACAGTTTGAGGATATTCGTATGAACATGTCAGAGGTGAAATTCTTGGATTTTGATCAGACGAACTACTGCGAAAGCATTTATCAAGGATGTTT	Eukaryota;Stramenopiles;Sagenista;Labyrinthulomycetes;Thraustochytriales;Thraustochytriaceae;Labyrinthuloides;Labyrinthuloides_minuta;	0.992545	15	0	0	0	0	0	0	0	0	0	0	0	0	0	0	0	0	0	0	0	23	0	9	2372	46	0	0	256	1439	171	81	166	78	33	37	0	15	0	47	22	57	37	794	107	46	37
10dcabc274e865d39558bf7cd02e2fde	AGCTCCAATAGCGTATATTAAAGTTGTTGCAGTTAAAAAGCTCGTAGTTGGATTTCTGTGGACGTTGGTAGTGGTGGTGCAAACAATGTACTTGCTACTATCGGCTCCTCATAATGTTCGCCTGCCGTTTTCTGCTCTTAACTGGGTGGTCAGCGGTGGTGGACCGATTACCTTGAACAAATTAGAGTGTTCAAAGCAGGCAATTCTTTTGCCCTGAATAAATTAGCATGGGATAATGGAATATGACTCGGCTCAAGTTCGTTGGTTATCTAGAGTCGAGTAATGGTTAATAGAGATTGTCGGGGTCATTCATATTCAATTGTCAGAGGTGAAATTCTTAGATTCTTTGAAGATGAACTGGTGCGAAAGCGTTTGACAAGGATGCTC	Eukaryota;Amoebozoa;Conosa;Variosea;ATCC50593-Flamella-WIM80-lineage;Flamella-lineage;Flamella;Flamella_arnhemensis;	1	0	0	0	0	0	0	0	0	0	0	0	0	0	0	0	0	0	0	0	0	0	0	0	0	0	0	0	0	0	12	0	0	0	0	0	0	0	0	0	0	0	0	0	0	0	0
10e4fe47e616bee6621c7d9ae434842b	AGCTCCAATAGTGTATCTTAATGTTGTTGCAGTTAAAAAGCTCGTAGTTGAATTTCTGGGGGGGTGTTTCAAGGTACGTCCTGTTTCTGCCCCCTCATCCGCTTTGGAACCAGGAGGGGTATTTAGTTATCGGCCTGGGGAAGGGGCATTTTACTTTGAAGAAATTAGAGTGTTCCAGGCAGGCTTTGCTTGAATACATCAGCATGGAATAATGGAATAGGACAATGTTCATTTTATTGGCTATTGAACTTGTAATGATTAACAGGGACAGTTGGGGGCATTCGTATTCATTTGTCAGAGGTGGAATTCTTGGATTAACTGAAGACGAACTAATGCGAAAGCATTTGCCAAGGATGTTT	Eukaryota;Alveolata;Ciliophora;Phyllopharyngea;Cyrtophoria_8;Dysteriidae;Dysteria_1;Dysteria_1_sp.;	1	0	0	0	0	0	0	0	0	0	0	0	0	0	0	0	0	0	0	0	0	0	0	0	0	0	0	0	0	0	0	0	0	0	19	0	0	14	0	0	0	0	0	0	0	0	0
114280086753bfab6fce1c19675fedf9	AGCTCCAATAGCGTATATTAAATTTGTTGCAGTTAAAAAGCTCATAGTTGAAATCCTGGTTAGAACTTGTGATGTTGCACTTGGTGCAGCAATCATTTTGCATTTGACCATCTTTGGGGGATATGTAGCTGGCATTAAGTTGTTGGTTGTAGACATCCCATCCTTTACTGTGAAGAAAATAGAGTGCTCAAAGCAGGCTTATGCCAATGAATACATTAGCATGGAATAATAAGATAAGATAGTGATGTTACTTTGTTGGTTTATGTGTCATTATAATGTTTAAGAGGGACTGTTGGGGGTATTTGTATTCCACTGTCAGAGGTGAAATTCTTGGATTTTTGGAAGACACACAACTGCGAAAGCATTTACCAAGGATGTTT	Eukaryota;Stramenopiles;Ochrophyta;Bacillariophyta;Bacillariophyta_X	0.871605	0	0	0	0	0	0	0	0	0	0	0	0	0	0	0	0	0	0	0	0	0	0	0	0	0	0	0	0	0	0	0	22	0	0	0	0	0	0	0	0	0	0	0	0	0	0
117c1cf333cf3b2990a00a7654930e2a	AGCTCCAATAGCGTATATTAAAGTTGTTGCAGTTAAAAAGCTCGTAGTTGAACTTCTGTACGTGTTCTGTTCTGGCTCCGGTCAAGCAGTTACGCGTGCATCCGCTTGCAAACTAGTCTCGTCCTTAACTGGTCGTTCTAGGGAGTAAGCCCTTTACTTTGAAAAAATTAGAGTGTTTCAGGCAGGCAATGGCTCGAATACATTAGCATGGAATAATGGAATAGGACTTTTGTCCATTTGGTTGGTTATTGGACTTAAGTAATGATTAAAAGGGACAGTTGGGGGCATTGGTATTTAACAGTCAGAGGTGAAATTCTTGGATTTGTTAAAGACTAACTTATGCGAAAGCATTTGCCAAGGATGTTTTCATTAATCAAG	Eukaryota;Alveolata;Ciliophora;Oligohymenophorea;Scuticociliatia_1;Cohnilembidae;Cohnilembus	0.999778	0	0	0	0	0	0	8	0	0	0	0	0	0	0	0	0	0	0	0	0	0	0	0	0	0	0	0	0	0	0	0	0	0	0	0	0	0	0	0	0	0	0	0	0	0	0
119f2af6531a396bad80eecf4f9bb60b	AGCTCCAATAGCGTATATTAAAGTTGTTGCAGTTAAAAAGCTCGTAGTTGGATTTGTGGCGTGTGCCGTGGCGTGTCCATTCTTTGGCTCTGCCGTGGCCGCGCCATCATTGGGTGGAGTCTGTGTGGCATTAGGTTGTCGTGCAGAGGATGCCCATCGTTTACTGTGAAAAAATTAGAGTGTTCAAAGCAGGCTTACGCCGTTGAATATATTAGCATGGAATAATAAGATAGGTCTTGGGTCCTATTTTGTTGGTTTGCGGGCCTTGGAAATGATTAATAGGGACAGTTGGGGGTATTCGTATTCCATTGTCAGAGGTGAAATTCTTGGATTTCTGGAAGACGAACTACTGCGAAAGCATTTACCAAGGATGTTT	Eukaryota;Stramenopiles;Ochrophyta;Bacillariophyta;Bacillariophyta_X;Raphid-pennate	0.996364	0	0	0	0	0	0	0	0	0	0	0	0	0	0	0	0	0	0	0	95	0	0	0	0	0	0	0	0	0	0	0	0	0	0	0	0	0	0	0	0	0	0	0	0	0	0
11a519bee0c4b0e36619f7b806bf5328	AGCTCCAATAGCGTATATTAAAGTTGTTGCAGTTAAAAAGCTCGTAGTTGGATCTCAGGGTGAGCTCAGTTGGTCGGCCTAATTGGTCAGAACTGGCTGTCTCTCCCTTGTTTCTGGATCCCTTCCGGAGTTGATTCTTCGGTAGTGGACTCCAGATCGTTTACCTTGAAAAAATTAGAGTGTTCAAAGCGGGCGTTTGCTTGAATACATTAGCATGGAATAATGGAATAGGACCCTGGTCTTATTTTGTTGGTTTTGAGGACCAGAGTAATGATTAATAGGGATAGTTGGGGGCATTCATATTTAATTGTCAGAGGTGAAATTCTTGGATTTATGAAAGATGAACTTCTGCGAAAGCATTTGCCAAGGATGTTT	Eukaryota;Hacrobia;Telonemia;Telonemia_X;Telonemia_XX;Telonemia-Group-1;Telonemia-Group-1_X;Telonemia-Group-1_X_sp.;	0.932568	0	0	0	0	0	0	0	0	0	0	0	0	0	0	0	0	0	0	0	0	14	0	0	0	0	0	0	0	0	0	0	0	273	0	0	0	0	0	0	0	0	0	0	48	0	0
11b653607e0974ef16c7f67fdfb21f52	AGCTCCAATAGCGTATATTAATGTTGTTGCAGTTAAAAAGCTCGTAGTTGGATATCTGGCATTGCGTTGACGGCCCGCCCCTTGGGGTTGAGTGCTGGATTCGCTTGCCTATTTTCCGGTTGGCGTCGGTTCCCTTTGTTGGGCGCCGTTTTCGCGATCCGGATCGTTTACTTTGAAGAAATTCGAGTGTTCAAAGCAGGCTTACGCCGTGAAGATTGCAGCATGGAATGATGACATAGAACTGTTGTGTTCTATTTTGTTGGTTCTGGGACCACAGTGATGATTGATAGGGACAGTTGGGGGTGCTGCTATTCCGCGGCCAGAGGTGAAATTCTCAGATTCCCGGAAGAGCAACTTATGCGAAAGCATTCACCAAAGATGTCT	Eukaryota;Rhizaria;Cercozoa;Chlorarachniophyceae;Chlorarachnida;Chlorarachnida_X;Chlorarachnion;Chlorarachnion_reptans;	0.999999	0	0	0	0	0	0	0	0	0	0	0	0	0	0	0	0	0	0	0	0	0	0	0	0	0	165	0	0	0	0	0	0	0	0	0	0	0	0	0	0	0	0	0	0	0	0
11cd807dc6fc6affbecbf9345f630871	AGCTCCAATAGCGTATATTAAAGTTGTTGCAGTTAAAAAGCTCGTAGTTGGACTTCTGGGAGGATGCAGTTGTCCGCCTTCACGGTGTGCGCAACAGCGTCCTTCCATCCTTCTGTCAACGCGTCTCGGGAGTCAAATCTCGGTCGTGGGCTCAGATATTTTACCTTGAGAAAATTAGAGTGTTTCAGGCAGGCTTGGTCCGGAATACATTAGCATGGAATAATAGAATAGGACTCCAGTCTCTTTGTTGGTTTCCGAGTTTGGAGTAATGATTAATAGGGATAGTTGGGGGCATTAGTATTTAATTGTCAGAGGTGAAATTCTCGGATTTGTTAAAGACTAACTTATGCGAAAGCATTTGCCAAGGATGTTT	Eukaryota;Alveolata;Ciliophora;Spirotrichea;Hypotrichia;Urostylidae;Tunicothrix;Tunicothrix_wilberti;	0.992745	0	0	0	0	0	0	0	0	0	0	0	0	0	0	0	0	0	0	0	0	0	0	0	0	0	0	0	0	0	0	0	0	0	0	0	0	0	0	0	0	0	0	0	0	0	0
11d23cb27e149a9eca4bdb9362ab9c11	AGCTCCAATAGGATATATCAAAGTTGTTGCAGTTGAAAAGCTCGTAGTCGTATTTCTGGTGGGTAGATGCCCCAACGCGTGCTCGGCGCAAGCTGGGTGGCTTGGGGCCGCCTGCCATATTGTGGGCTTCAGTGGCCAGGTGTGCGATTTGTTTCGTGCCCTGGTCGCTCCACTCCGTCACTGAGAGCAAATTGGAGTGCTCAAAGCAGGCTTTACAGCTTTGAACATTTTAGCTTGGAATGACAAAGGATGACTTTTTGTTCACTTTGTTGGTTATGAATAGGAAGTAATGATAAATAGGAACAGTTGCGGGGGTACTCGTACTGGAAAGTCAGAGGTGAAATTCTTGGATTTTTCCACGACGAACAACTGCGAAAGCATTTATCAAGGATGTTT	Eukaryota;Stramenopiles;Sagenista;Labyrinthulomycetes;Thraustochytriales;Thraustochytriaceae;Amphifilidae;Amphifilidae_sp.;	0.894304	0	0	0	0	0	0	0	0	0	0	0	0	0	0	0	0	0	0	0	0	5	0	0	0	0	0	0	0	0	0	0	0	0	0	0	0	0	0	0	0	0	0	0	0	0	0
1205f794f1bbe0706275f3f3061d6c1d	AGCTCCAATAGCGTATATTAATGTTGTTGCAGTTAAAAAGCTCGTAGTTGGATTTCTGCGTCACGCAGCTCGGTCCGGCGCTTGGCGCTGTGACGTTGTGGCTGGGGTGTCGCATCCTTGTGGGGATCACTTACGCCATTGATTTGGTGAATTTGGGAACCGCATCGTTTACTGTGAAAAAATTAGAGTGTTCAAAGCAGGCTTATGCCGTGAATACATTAGCATGGAATAATAAGATAGGACTTTGGTTCTATTTTGTTGGTTGGAGGCCAAGGTAATGATTAATAGGGATAGTTGGGGGTATTCATATTTAATTGTCAGAGGTGAAATTCTTGGATTTATGAAAGATGAACTTATGCGAAAGCATTTACCAAGGATGTTT	Eukaryota;Stramenopiles;Opalozoa;MAST-3;MAST-3J;MAST-3J_X;MAST-3J_XX;MAST-3J_XX_sp.;	0.999004	0	0	0	0	0	0	0	0	0	0	0	0	0	0	0	0	0	0	3	0	0	0	0	0	0	0	0	0	0	0	0	0	0	0	0	0	0	0	0	0	0	0	0	0	0	0
124475cd6820b049d8a98607864a2fcb	AGCTCCAATAGCGTATATTAAAGTTGTTGCAGTTAAAAAGCTCGTAGTTGAACTTCTGTACATTCCCGAAGCCGGCTCTTGTCGATTCGTGGAATGTGCATCCGCTTACAAACTTAGCCCGGCATTCACTTGTCGACTAAGGGAGTAGGCCCTTTACTTTGAAAAAATTAGAGTGTTTCAAGCAGGCAATGGCTCGAATACATTAGCATGGAATAATGGAATAGGACTGAGGTCCATTTGGTTGGTTATTGGACTTTAGTAATGATTAACAGGGACAGTTGGGGGCATTAGTACTTAACAGTCAGAGGTGAAATTCTTGGATTTGTTAAAGACTAACTTATGCGAAAGCATTTGCCAAGGATGTTT	Eukaryota;Alveolata;Ciliophora;Oligohymenophorea;Scuticociliatia_1;Philasterida;Metanophrys;Metanophrys_sinensis;	0.998162	0	0	0	0	0	0	0	0	0	0	0	0	0	0	0	0	0	0	0	0	232	0	0	0	0	0	11	0	0	0	0	0	0	0	0	0	0	0	0	0	0	0	0	0	0	0
12a159ac3694e380ffae0f29076e5aa5	AGCTCCAATAGCGTATATTAAAGTTGTTGCAGTTAAAAAGCTCGTAGTTGGATTTCGGAGTCCGAGGGCGCAGACGCCGAGAGGCGTGGTGCGTGACTTGGGCTCTTCCTTCCAGGGAGGCAGTCTGTGCTTAACCGCACGGGCTGTGGACTTGGATTGTTTACTTTGAGAAAATTATGGTGTTCAAAGCAGGCTAGCGCCTTGAGTATATTAGCATGGAATAATGGAATAGGACATCGGCTCGCAAGAGTAGATCCTATTTTGTTGGTTTCTAGGACCGATGTAATGATTAATAGGGATAGTTGGGGGCATTAATATTTAATTGTCAGAGGTGAAATTCTTGGATTTATTAAAGATTAACTTCTGCGAAAGCATTTGCCAAGGATGTTT	Eukaryota;Apusozoa;Mantamonadidea;Mantamonadida;Mantamonadida_X;Mantamonadida_XX;Apusozoa_;Apusozoa_sp.;	0.995671	0	0	0	0	0	0	0	0	0	0	0	0	0	0	0	0	0	0	0	0	0	0	0	0	0	0	0	0	0	0	0	0	0	0	0	0	0	0	0	0	0	0	0	0	0	0
12a2d46d7f1cf2f678769ae5247b4a73	AGCTCCAATAGCGTATATTAATGTTGTTGCAGTTAAAAAGCTCGTAGTTGGATTTCTGACAGGAGCGACCGGTCCGATCCTTTGGGTCGAGTACTTTGTGTTGTCTCTAGTCATCCTTATGGAGAACCTGCGTGGCATTAAGTTGTCGTGTAGGGGAACCATATCGTTTACTGTGAAAAAATTAGAGTGTTTAAAGCAGGCAATCGCTGTGAATACGTTAGCATGGAATAATAAGATAGGACTTTGGTACTATTTTGTTGGTTTACATACCAAGGTAATGATTAAGAGGGACAGTTGGGGGTATTCGTATTTAATTGTCAGAGGTGAAATTCTTGGATTTATGAAAGACGAACTACTGCGAAAGCATTTACCAAGGATGTTT	Eukaryota;Stramenopiles;Sagenista;Labyrinthulomycetes;Labyrinthulales;Labyrinthulaceae;Oblongichytrium;Oblongichytrium_sp.;	0.846087	0	0	0	0	0	0	0	0	0	0	0	6	0	0	0	0	0	0	29	13	0	0	0	0	0	0	0	0	0	0	0	0	0	0	0	0	0	0	0	0	0	0	0	0	0	0
12ba938fb6ea23ea94c2981b6055850e	AGCTCCAATAGCGTATACTAAAGTTGTTGCAGTTAAAAAGCTCGTAGTTGAACTTCTGTACAGTCTCAGTTCTGGCTTAGGTCAAGCTGTTGGTTGTACATCCGCTTGCAAAGCTAGTTCGGCCTTAACTGGTCGGCTGGTAGAGTAAGCCTTTTACTTTGAAAAAATTAGAGTGTTTCAGGCAGGCAATGGCTCGAATACATTAGCATGGAATAATGGAATAGGACTTTTGTCCATTTGGTTGGTTATTGGACATGAGTAATGATTAAAAGGGACAGTTGGGGGCATTGGTATTTAACAGTCAGAGGTGAAATTCTTGGATTTGTTAAAGACTAACTTATGCGAAAGCATTTGCCAAGGATGTTT	Eukaryota;Alveolata;Ciliophora;Oligohymenophorea;Scuticociliatia_1;Philasterida;Parauronema;Parauronema_cf._virginianum;	0.841428	0	0	0	0	0	0	0	0	0	0	109	147	0	0	0	0	0	0	34	0	921	17	0	26	21	50	513	9	12	14	0	0	111	0	34	19	0	0	33	26	18	33	41	265	0	9545
12c1db70229b527b8b10fae663c2cbd4	AGCTCCAATAGCGTATATTAAAGTTGTTGCAGTTAAAAAGCTCGTAGTTGGATGTCTGCTCGGTTATGCCAGTCGGCCCTCAGGGTCTGTACTTGGTGATTTCCGGGCATTTACTAAGGAACACGACTGCACTTGATTGTGTGGCGTGCGACTTAGTTCCGTTACTTTGAGAAAATTAGAGTGTTTCAAGCAGGCCTACGCCTTGAATACTGCAGCATGGAATAATATTTTAAGGCTTTGTTCTTATTTATTGGTTTTAAAGACCAAAGCAAGGATTAATAGGGACGGTTGGGGGCGTTCGTATTTGATTGTCAGAGGTGAAATTCTTGGATTTATCAAAGACGAACAACTGCGAAAGCATTCGCCAAAGATGTTT	Eukaryota;Alveolata;Apicomplexa;Colpodellidea;Colpodellida;Chromeraceae;Chromera;Chromera_sp.;	1	0	0	0	0	0	0	0	0	0	0	0	0	0	0	0	0	0	0	0	0	0	0	0	0	0	0	0	0	22	7	6	0	0	0	0	0	0	0	0	0	0	0	0	0	0	0
12c92fbbd24960f10663318fb75f09d9	AGCTCCAATAGCGTATATTAAAGTTGTTGCAGTTAAAAAGCTCGTAGTTGGATTTCTGGTGGGAGCGATCGGTCTGGCGCTTAGCGCGAGTACTTGCATCGTCTCCGGCCATCCTTGGGGAGAGTCTGTCTGGCATTAGGTTGTCGGGCAGAGGATCCTCATCGTTTACTGTGAAAAAATTAGAGTGTTCAAAGCAGGCTTATGCCGTTGAATATATTAGCATGGAATAATAAGATAGGACCTTGGTACTATTTTGTTGGTTTGCGCACCAAGGTAATGATTAATAGGGACAGTTGGGGGTATTCGTATTTCATTGTCAGAGGTGAAATTCTTGGATTTTTGAAAGACGAACTACTGCGAAAGCATTTACCAAGGATGTTT	Eukaryota;Stramenopiles;Ochrophyta;Bacillariophyta;Bacillariophyta_X;Polar-centric-Mediophyceae;Minutocellus	0.841386	0	0	0	0	0	0	0	0	0	2	0	0	0	0	0	0	0	0	0	0	0	0	0	0	0	0	0	0	0	0	0	0	0	0	0	0	0	0	0	0	0	0	0	0	0	0
1300a28f6c498af3e85b011352d60b78	AGCTCTAATAGCGTATATTAAAGTTGTTGCGGTTAAAACGCTCGTAGTTGGATTTTATGTTGGTTCTGTTGGCGGTCCGCGGCATTGTCGTGTGTACTGTCGACGCCAGCATCCATGGCAGTCAACTTGCCTCGGCCTTCACTGGTCGGGGATTGAAGTTCTGTCGCATTTACTTTGAGTAAATTAGAGTGTTCAAAGCAGGTACATTTTTCAACCGTTGAATACTGCAGCATGGGATAATGGAATAGGACTTTGGTTCTATTTTGTTGGTTTCTAGAGCCGAAGTAATGATTAATAGGGACAGTTGGGGGCATTCGTATTTAATTGTCAGAGGTGAAATTCTTGGATTTGTTAAAGACGAACTACTGCGAAAGCATTTGCCAAGGATGTTT	Eukaryota;Amoebozoa;Lobosa;Discosea-Longamoebia;Dermamoebida;Dermamoebidae;Dermamoebidae_X;Dermamoebidae_X_sp.;	0.825118	0	0	0	0	0	0	0	0	0	0	0	0	0	0	0	0	0	0	0	0	0	0	0	0	0	0	0	0	0	0	0	0	0	0	0	0	0	0	0	0	0	0	0	0	0	0
13071ddc469bb34047050a0f97f2965b	AGCTCCAATAGCGTATATTAAAGTTGTTGCGGTTAAAAAGCTCGTAGTTGGATTTCTGCTGAGGACGACCGGTCCGCCCTCTGGGTGAGTATCTGGCTCGGCCTGGGCATCTTCTTGGAGAACGTAGCTGCACTTGACTGTGTGGTGCGGTATCCAAGACCTTTACTTTGAGGAAATTAGAGTGTTTCAAGCAGGCACACGCCTTGAATACATTAGCATGGAATAATAAGATAGGACCTTGGTTCTATTTTGTTGGTTTCTAGAGCTGAGGTAATGATTAATAGGGATAGTTGGGGGCATTCGTATTTAACTGTCAGAGGTGAAATTCTTGGATTTGTTAAAGACGGACTACTGCGAAAGCATTTGCCAAGGATGTTTTCATCGATCAAGAACGAAA	Eukaryota;Alveolata;Dinoflagellata;Dinophyceae;Peridiniales;Thoracosphaeraceae	0.858938	0	0	0	0	0	0	0	0	0	0	0	0	0	0	0	0	0	0	0	0	0	0	0	0	0	0	0	0	0	0	0	0	0	0	0	0	4	0	0	0	0	0	0	0	0	0
132f6a24eec3d8298c2bedc5f57f45cd	AGCTCCAATAGCGTATATTAAAGTTGTTGCAGTTAAAAAGCTCGTAGTTGGATTTCTGGTGGGAGTGACCGTTCCGGACTTGATTGTCTGTGTATTGAGTTTTCTCCAGCCATCCTTGTGGAGAACATTTCTTGCATTAATTTGTTGGGATTGGGACCCACATCGTTTACTGTGAAAAAATTAGAGTGTTTAAAGCAGGCAATCGCTTGAATACATTAGCATGGAATAATAAGATAGGACTTTGGTACTATTTTGTTGGTTTGCATACCAAATTAATGATCAACAGGAACAGTTTGAGGATATTCGTATGAACATGTCAGAGGTGAAATTCTTGGATTTTGATCAGACGAACTACTGCGAAAGCATTTATCAAGGATGTTT	Eukaryota;Stramenopiles;Sagenista;Labyrinthulomycetes;Thraustochytriales;Thraustochytriaceae;Labyrinthuloides;Labyrinthuloides_minuta;	0.805655	0	0	0	0	0	0	0	0	0	0	0	0	0	0	0	0	0	0	0	0	0	0	0	0	0	0	0	0	0	0	0	0	0	0	0	0	0	0	91	0	0	0	0	0	0	0
138d12096e63151f28161431db0383a9	AGCTCCAATAGCGTATATTAAAGTTGCTGCAGTTAAAAAGCTCGTAGTTGCATTTCCGAGGCAAGGGATTAGTCCGACCTTTGGTGGGTATTTAATCCTCTTGCCTCGTCCTTGAGTGGTGCTTCTTGGTATTAAGTTATCGAGGAGATAGCCGCTCATCGTTTACTGTGAGAAAATTAGAGTGTTCAAAGCAGGCTTATGCCGTTGAATATATTAGCATGGAATAATAAGATAGGACCTCGGTACTATTTTGTTGGTTTGAGAACCAAGGTAATGATGAATAGGGACAGTTGGGGGTATTCGTATTCAGTTGTCAGAGGTGAAATTCTTAGATTTACGGAAGACGAACTACTGCGAAAGCATTTACCAAGGATGTTT	Eukaryota;Stramenopiles;Ochrophyta;Bacillariophyta;Bacillariophyta_X;Polar-centric-Mediophyceae;Chaetoceros	1	0	0	0	0	0	0	0	0	0	0	0	0	0	0	0	0	0	0	0	0	0	0	0	0	0	0	0	0	0	0	0	0	0	0	0	0	0	0	0	0	0	0	0	0	0	0
13b197a9dad88d93f0463df802f82407	AGCTCCAATAGCGTATATTAAAGTTGTTGTGGTTAAAAAGCTCGTAGTTGAACCTTGGGCCTGGCTGGCCGGTCCGCCTCACCGCGTGTACTGGTCCGGCCGGGCCTTTCCCTCTGTGGAACCTCATGCCCTTCACTGGGTGTGGCGGGGAAACAGGACTTTTACTTTGAAAAAATTAGAGTGCTCCAGGCAGGCCTATGCTCGAATACATTAGCATGGAATAATAAAATAGGACGCGTGGTTCTATTTTGTTGGTTTCTAGGACCGCCGTAATGATTAATAGGGACAGTCGGGGGCATCAGTATTCAATTGTCAGAGGTGAAATTCTTAGATTTATTGAAGACTAACTACTGCGAAAGCATTTGCCAAGGATGTTT	Eukaryota;Opisthokonta;Fungi;Ascomycota;Pezizomycotina;Sordariomycetes	0.999997	0	0	0	0	0	0	0	0	0	0	0	263	0	0	0	0	0	0	0	0	0	0	0	0	0	0	0	0	0	0	0	0	0	0	0	0	0	0	0	0	0	0	0	0	0	0
13e5e9404a92c6d6ccd5c7fc3c1a485d	AGCTCCAATAGCGTATATTAAAGTTGTTGCAGTTAAAAAGCTCGTAGTTGAACTTTGGGCTTGGTTGGCCGGTCCGCCTTTTTGGCGAGTACTGGACCCAACCGAGCCTTTCCTTCTGGCTAACCATTCGCCCTTGTGGTGTTTGGCGAACCAGGACTTTTACTTTGAAAAAATTAGAGTGTTCAAAGCAGGCCTTTGCTCGAATATATTAGCATGGAATAATAGAATAGGACGTTATGGTTCTATTTTGTTGGTTTCTAGGACCATCGTAATGATTAATAGGGACGGTCGGGGGCATCAGTATTCAGTTGTCAGAGGTGAAATTCTTAGATTTACTGAAGACTAACTACTGCGAAAGCATTTGCCAAGGACGTTT	Eukaryota;Opisthokonta;Fungi;Ascomycota;Saccharomycotina;Saccharomycetales;Meyerozyma	0.727514	0	0	0	0	0	0	0	0	0	0	0	56	0	0	0	0	0	0	0	0	0	0	0	0	0	0	0	0	0	0	0	0	0	0	0	0	0	0	0	0	0	0	0	0	0	0
14091bd9bb72198b31ec9b259c8f3d95	AGCTCCAATAGCGTATATTAAAGTTGTTGCAGTTAAAAAGCTCGTAGTTGGATTTGTGGTGGTCCCTGTGGTCCAAAAATGGTACTTTCGGGGACTGCCATCCTTGGGTGGATCCTGTGTGGCATTAGGTTGTCGTGCAGGGGATGCCCATCGTTTACTGTGAAAAAATTAGAGTGTTCAAAGCAGGCTTATGCCGATGAATAGATTAGCATGGAATAATAAGATAGGACCTCGGTACTATTTTGTTGGTTTGCGCACTGAGGTAATGATTAACAGGGACAGTTGTGGGTATTCGTATTGCATTGTCAGAGGTGAAATTCTTGGATTTCTGCAAGACGAACTAATGCGAAAGCATTTACCAAGGATGTTTTCATTAATCAGAACGAAAGT	Eukaryota;Stramenopiles;Ochrophyta;Bacillariophyta;Bacillariophyta_X;Raphid-pennate;Amphora;Amphora_sp.;	0.993636	0	0	0	0	0	0	0	0	0	0	0	0	0	0	0	0	0	0	0	0	0	0	0	0	0	0	0	0	0	0	0	0	0	0	0	3	0	0	0	0	0	0	0	0	0	0
141d6659b82027c33b4e946137ebfaec	AGCTCTAATAGCGTATATTAAAGTTGTTGCAGTTGAAACGCTCGTAGTTGAACCTTAGTAAAACTTTTCATTGCTGCCTTAGGCAGTGTTGAAGGTTTCTTATTTAATTAGTTTTGCTCTGCAAGATTGATTAAAAGTGTTACTGTAAGAAAATTAGAGTGTTTCAAGCAGGCGTATGTTTTGAATACTTCATTATGGAATAATGTTATAATTTGATTTCTCTCAAGTTGATTCTTGGAAAGTCAATTAGTGATTGAAAGAGGCAGTCGGGGGCATTCGTATTTGGTAGCTAGAGGTGAAATTCTTAGATTTATCAAAGACGTACTATTGCGAAAGCATTTGCCAAGGATGTTC	Eukaryota;Alveolata;Apicomplexa;Gregarinomorphea;Neogregarinorida;Actinocephalidae;Psychodiella	0.835385	0	0	0	0	0	0	0	0	0	0	0	0	0	0	0	0	0	0	0	0	0	0	0	0	0	0	13	0	0	0	0	0	0	0	0	0	0	0	0	0	0	0	0	0	0	0
14721f24292b450dfbbe0102bd712297	AGCTCCAATAGCGTATATTAAAGTTGTTGCAGTTAAAAAGCTCGTAGTTGAAGCCAAGGAAAACAGACTAGAGAAATCTCCGGTCTGTCTTTCCACTTCTCGCAAAGACGCCTTCTCATATTAATTTATGGGTTGGTTGAGTTGCGTCGTTTACTGTGAACAAATTAGGGTGTTTAAAGCAAGCCTATGTTTGAATACACTAGCATGGAATAATAAGATATGACCAAAGTAGTATTTTGTTGGTGACCATTTTGGTAATGATTGAAAGAAACTGTTGTGGGTATTCGTATGAGCATGTCAGAGGTGAAATTCTTGGATTTTGATCAGACGAACTACTGCGAAAGCATTTACCAAGGATGTTT	Eukaryota;Stramenopiles;Sagenista;Labyrinthulomycetes;Labyrinthulales;Labyrinthulaceae;Labyrinthula;Labyrinthula_sp.;	0.912781	0	0	0	0	0	0	0	0	0	13	0	0	0	0	0	0	0	0	0	0	0	0	0	0	0	0	0	65	0	0	0	0	0	0	0	0	0	0	0	0	0	0	0	0	0	0
14872fc602653cad73a6a3e7ea6e73c0	AGCTCCAATAGTAGATATCAAAATTGTTGCAGTTGAAAAGCTCGTAGTTGAGATTCTGGGAAGTGTCGCTATTCTAGGCTTGACGCAAGTCATTCTAGTTGGTGAGCTTTCCATCTTGTGGAATCCGCGTTGTTCGTTTGTTCGGATGACGTGCCACTCAGTTACTGAGAGCAAATTGGAGTGCTCAAAGCAGGCTATACAGCTTTGAACAATTAAGCTTGGAATAACAATTAACGACTTGTTTGTAATTGTTGGTTGTACATTAACAAGTAATGCTTGAAAGGGAACAGTTGTCGGGGATATTCGTATGAGCAAGTCAGAGGTGAAATTCAAGGATTTTGCTTAGACGAACGACTGCGAAAGCATCTATCCAGCATGTTT	Eukaryota;Stramenopiles;Sagenista;Sagenista_X;Sagenista_XX;Sagenista_XXX;Diplophrys;Diplophrys_marina;	1	0	0	0	0	0	0	0	0	0	0	0	0	0	0	0	0	0	0	0	0	44	0	0	0	0	0	0	0	0	0	0	0	0	0	0	0	0	0	0	0	0	0	0	0	0	0
14f2c2a27d0c683fc02f35b9aff78d6f	AGCTCCAATAGCGTATATTAAAGTTGTTGCAGTTAAAAAGCTCGTAGTTGGATTTCTGGTAGGAGCGACCATACCGGACTTGATTGTCCGCGTAATGCGTTGTCTCCAGCCATCCTCGTGGAGATTGTTTTTGGCATTAACTTGTCGAATTCGGGACCCGCGTCATTTACTGTGAAAAAATTAGAGTGTTTAAAGCAGGCAATTGGCTTGAATACATTAGCATGGAATAATAAGATAGGACTTTGGTGCTATTTTGTTGGTTTGCACATCAAGGTAATGATTAACAGAATCAGTCGGGGATATTCGTATGCAAATGTCAGAGGTGAAATTCTTGGATTTTTTACAGACGAACAACTGCGAAAGCATTTATCAAGGATGTTT	Eukaryota;Stramenopiles;Sagenista;Labyrinthulomycetes;Labyrinthulales;Labyrinthulaceae;Labyrinthulaceae_X;Labyrinthulaceae_X_sp.;	0.997064	0	0	0	0	0	0	0	0	0	0	0	0	0	81	61	352	0	354	84	152	0	0	0	0	0	0	0	0	272	100	0	0	0	0	88	0	0	0	0	0	0	0	0	0	0	0
151564a1ee65bf12675b89414c549141	AGCTCCAATAGCGTATATTAAAGTTGTTGCAGTTAAAAAGCTCGTAGTTGAATTTCGGAACCTCGTTCCCGTCTCTTGATTGAGGCGGTGCGGGTTTCCTCCTCGCCTTTGGCGTCATTTACTGTGAAAAAATTAGAGTGTTCAAAGCAGGCAATCGCTTGAATACATTAGCATGGAATAATAAGATAGGATCTTCGTCTATTTTGTTGGTTGCGGACAAAGATAATGATTAATAGGGATAGTTGGGGGTGTCTGTATTGTGTTGTCAGAGGTGAAATTCTTAGATTTACACAAGACAAACTACTGCGAAAGCATTCACCAAGGATGTTTTCATCGATCAAGAACGAAA	Eukaryota;Stramenopiles;Opalozoa;Bicoecea;Anoecales;Caecitellaceae;Caecitellus;Caecitellus_parvulus;	0.928207	0	0	0	0	0	0	0	0	0	0	0	37	0	0	0	0	0	0	0	0	0	0	0	0	0	0	0	0	0	0	0	0	0	0	0	0	0	0	0	0	0	0	0	0	0	0
155a1b9d4d562b2252dbcd7e93491fa7	AGCTCCAATAGTGTATCTTAATGTTGTTGCAGTTAAAAAGCTCGTAGTTGAATTTCTGGCAATACAGCTGATCTTTTCGAGAAGCACGTATATGTCATCCGCATTGGAAGCACATTCGATAGCAATATCAGTGTGTGGAAGGTGCATTTTACTTTGAAGAAATTAGAGTGTTCCAGGCAGGCTATGCTTGAATATTACAGCATGGAATAATGGAATAGGACAAGTTCATTTTATTGGTTATTGAATTTGTAATGATTAACAGGGACAGTTGGGGGCATTCGTATTGGGTAGTCAGAGGTGAAATTCTTAGATTTACTCAAGACGCACTAATGCGAAAGCATTTGCCAAGGATGTTT	Eukaryota;Alveolata;Ciliophora;Phyllopharyngea;Cyrtophoria_7;Hartmannulidae;Hartmannulidae_X;Hartmannulidae_X_sp.;	1	0	0	0	0	0	0	0	0	0	0	0	0	0	0	0	0	0	0	0	0	16	0	0	0	0	0	13	6	0	0	0	0	10	0	0	4	0	0	0	0	0	0	0	4	0	0
156c92c9447babeaea20659f4a17f5ee	AGCTCCAATAGCGTATATTAATGTTGTTGCAGTTAAAAAGCTCGTAGTTGGATTTCTGACAGGAGGCGGCCGGTCCGACCTATTTTGGTTGAGTACTTTGCGTCGTCTCTAGTCATCCTGATGGAGATCGCCTTTGGCATTCAGTTGTCGGGGTGGGATTCATCTCTTTTACTGTGAATAAAATAGAGTGTTTAAAGCAGGCAATTGCTGTGAATATGCTAGCATGGAATAATAAGATAGGACATTGGTGCTATTTTGTTGGTTTACACACCAAAGTAATGATTAAGAGGGATAGTTGGGGGTATTTCTATTTGTGATTCAGAGGTGAAATTCTTGGACATCGTAAAGAGAAACTACTGCGAAAGCATTTACCAAGGATGTTT	Eukaryota;Stramenopiles;Sagenista;Labyrinthulomycetes	0.908118	0	0	0	0	0	2	0	0	0	0	0	0	0	0	0	0	0	0	173	497	0	0	0	0	0	0	0	0	0	0	0	0	0	0	0	0	0	0	0	0	0	0	0	0	0	0
159ac8f40fe37ea6317678ba5f9740e0	AGCTCCAATAGCGTATATTAAAGTTGTTGCAGTTAAAAAGCTCGTAGTTGGATCTCAGGGTGAGCTCAGTTGGTCGGCCTAATTGGTCAGAACTGGCTGACTCTCCCTTGTTTCTGAATCCCGGTCGGAGTTAATTCTTCGTTCGTGGACTTCAGATCGTTTACCTTGAAAAAATTAGAGTGTTCAAAGCGGGCGTTTGCTTGAATACATTAGCATGGAATAATGGAATAGGACCCTGGTCTTATTTTGTTGGTTTTGAGGACCAGAGTAATGATTAATAGGGATAGTTGGGGGCATTCATATTTAATTGTCAGAGGTGAAATTCTTGGATTTATGAAAGATGAACTTCTGCGAAAGCATTTGCCAAGGATGTTT	Eukaryota;Hacrobia;Telonemia;Telonemia_X;Telonemia_XX;Telonemia-Group-1;Telonemia-Group-1_X;Telonemia-Group-1_X_sp.;	0.707884	0	0	0	0	0	0	0	0	0	0	0	0	0	0	0	0	0	0	0	0	0	0	0	0	0	0	0	0	0	0	0	0	11	0	0	0	0	0	0	0	0	0	0	0	0	0
15a330f79da91e13d095127d18a5db88	AGCTCCAATAGCGTATATTAAAGTTGTTGCAGTTAAAAAGCTCGTAGTTGAACTTCTGGTAGGAGTGACCCGGCCTTTGGGCGAATGCCCTCTGTTTGCTGTGTGTTGTCTCTGGCCATCTTTCTCTTTCGTTAAGGAAGGGATCATTTACTGTAAAAAAATTAGAGTGTTCAAAGCAGAAAGTATGTTTGGAATATGTTAGTATGGAATAATGAGATACGACCTTTGTTGTACTTTGTTGGTTTAAGATCAAGGGTAATGATTAACAGGGACAGTTGGGGGTATTCGTATTTACTAGTCAGAGGTGAAATTCTTGGATTTAAGAAAGACGAACTACTGCGAAAGCATTTACCAAGGATGTTT	Eukaryota;Stramenopiles;Sagenista;Labyrinthulomycetes;Thraustochytriales;Thraustochytriaceae;Thraustochytriaceae_X;Thraustochytriaceae_X_sp.;	0.953398	0	0	0	0	0	0	0	0	0	0	0	0	0	0	0	0	0	0	0	0	0	0	0	0	0	0	0	0	0	0	0	0	0	0	0	0	0	0	0	0	0	0	0	12	0	0
15caf7f60896d5353179abccfe8771e2	AGCTCCAATAGCGTATATTAAAGTTGTTGCAGTTAAAAAGCTCGTAGTTGGATTTCTGGTGGGAGTGACCGTTCCGGACTTGATTGTCTGTGTATTGAGTTGTCTCCAGCCATCCTTGTGGAGAACTTTTCTTGCATTAATTTGCATGGATTGGGACCCACATCGTTTACTGTGAAAAAATTAGAGTGTTTAAAGCAGGCAATCGCTTGAATACATTAGCATGGAATAATAAGATAGGACTTTGGTACTATTTTGTTGGTTTGCATACCAAATTAATGATCAACAGGAACAGTTTGAGGATATTCGTATGAACATGTCAGAGGTGAAATTCTTGGATTTTGATCAGACGAACTACTGCGAAAGCATTTATCAAGGATGTTT	Eukaryota;Stramenopiles;Sagenista;Labyrinthulomycetes	1	0	0	0	0	0	0	0	0	0	0	0	0	0	0	0	0	0	0	0	0	0	0	0	0	0	0	0	0	0	0	0	0	0	0	0	0	0	0	195	0	0	0	0	0	0	0
15cfadd314731e5ef3f4f029f6ad80f9	AGCTCCAATAGCGTATATTAAAGTTGTTGCAGTTAAAAAGCTCGTAGTTGGATTTCTGGTGGGGGCCGCTGGCCCGCTGCGAAAGCGGCGTGTGCCGATGCGTGCCTACCGCCATCCTCGGGTGGAGTGCGTGTGGGATTGATTTCTCGTGCGTAGGATGCCCGTCATTTACTGTGAAAAAATTAGAGTGTTCAAAGCAGGCTTTGGCCGTTGAATACATTAGCATGGAATAATAAGATAGGACTTGGCTCTATTTTGTTGGTTTGTACGCCAAGTAATGATTAATAGGGATAGTTGGGGGTATTCGTATTCAATTGTCAGAGGTGAAATTCTTAGATTTCTGGAAGACGAACTACTGCGAAAGCATTTACCAAGGATGTTT	Eukaryota;Stramenopiles;Ochrophyta;Pinguiophyceae;Pinguiochrysidales;Pinguiochrysidaceae;Pinguiochrysis;Pinguiochrysis_pyriformis;	0.841177	0	0	0	0	0	0	0	0	0	0	0	0	0	0	0	0	0	0	0	0	0	0	0	0	0	0	0	0	13	0	8	84	0	24	0	0	0	0	0	0	16	0	0	0	0	0
15dbe409581af0e7c7f517358fb37451	AGCTCCAATAGCGTATATTAATGTTGTTGCAGTTAAAAAGCTCGTAGTTGGATTTCGGACTGGAGAGGCGGGCCGGCTCCGCAAGGGGTCGTAGCCTGATGTCCTGCTCTGGTTCTTTTCGGGAATTCTCTGGCGTTGCTGGCATTCATTTGTCGGTGGCGTTGGACCCGTCGTTTACTGTGAACAAATTAGAGTGTTCCAAGCAGGGTAACCTACTTGAATACATTAGCATGGAATAATAAGATAGGACTTTGGTGGTTTTGCTGCTCTTCTTCACGGGGGAGTAGTGAATATTTTGTTGGTTTGCACGCCAAAGTAATGATTAATAGGAGCAGTTGGGGGTATTCGTATTCAATTGTCAGAGGTGAAATTCTTGGATTTCTAGAAGACGAACTACTG…	Eukaryota;Stramenopiles;Ochrophyta;Dictyochophyceae;Dictyochophyceae_X;Dictyochophyceae_XX;Ciliophrys;Ciliophrys_infusionum;	0.999995	0	0	0	0	0	0	0	0	0	0	0	0	0	0	0	0	0	0	0	0	0	0	0	0	0	0	0	0	0	0	0	0	42	0	0	0	0	0	0	0	0	0	0	0	0	0
15fb4a199ae6abf8040224dad706b0c5	AACTCCAAGAGTGTATCTTAATGTTGCTGCAGTTAAAAAGCTCGTAGTTGACCTTCTGGCTGTTGAGTCCGCAAATGCGTGGACTCGGCAGTCATCCGCTAGGAGAAGTAGTATTTCTGTCAAAGGTTTTACTACGGACCCAGCATTTTACTTTGAAGAAATTAGAGTGTTCCTGGCAGGCTAAGCTTGCATATATTAGCATGGAATAATGGAATAGGACCTTTTCTGTTTCATTGGTTGACAGATAGGTAATGATTAACAGGGACAGTCGGGGGCATTCGTACTCAGTGGCTAGAGGTGAAATTCTTAGATTCGCTGAAGACGAACTAATGCGAAAGCATTTGCCAAGGATGTTT	Eukaryota;Alveolata;Ciliophora;Phyllopharyngea;Cyrtophoria_4;Chilodonellidae;Pseudochilodonopsis;Pseudochilodonopsis_fluviatilis;	0.995105	0	0	0	0	0	0	0	0	0	0	0	0	0	0	0	0	0	0	0	0	0	0	0	0	0	0	0	129	0	0	0	0	0	0	0	0	0	0	0	0	0	0	0	0	0	0
160121cb9a205e76d3446f3219acee1b	AGCTCTAATAGCGTATTCTAATGTTGTTGCAGTTAAAAAGCTCGTAGTTGAAATTCCGGCGGTCTCCGCCTGTCAGGGAGGTCTAGGGATACTGTCAAAGGTTTCTCTAGTTTGAACTGACTTTTACTGTGAACAAATTAAAGTGCTTAAAGCAGGCAATCGCTTGAATATTTTAGCATGGAATAATAGAAGATGACTTTATTCATTTAGCTTGGTTATTGGATAGAGTAATGGTTAACAGAAACAGTTGGGGGCATTCGTATTTAATAGTCAGAGGTGAAATTCTTAGATTTATTAAAGACGAACTAATGCGAAAGCATTTGCCAAGGATGTTT	Eukaryota;Alveolata;Ciliophora;Phyllopharyngea;Suctoria;Endogenida_2;Endogenida_2_X;Endogenida_2_X_sp.;	0.997738	0	0	0	0	0	0	0	0	0	0	0	0	0	0	0	0	0	0	0	0	15	0	0	0	0	0	0	0	0	0	0	0	0	0	0	0	0	0	0	0	0	0	0	8	0	0
1615ba6abc3701f56f048d554263e640	AGCTCCAATAGCGTATATTAAAGTTGTTGCAGTTAAAAAGCTCGTAGTTGGACTTCTGGGAGGGCGCCAATGTCCGCTGTTGCGTGTGCAGCGGCGCCCTTCCATCCTTCTGTTAACGTTTCTTGGTATTCAGTTACTGGTTTCGGGCTCAGATATTTTACCTTGAGAAAATTAGAGTGTTTCAGGCAGGCTTGCGCCGGAATACATTAGCATGGAATAATAGAATAGGACTTTTGTCTCTTTTGTTGGTTTGAGGGACTGAAGTAATGATTAATAGGGATAGTTGGGGGCATTAGTATTTAATTGTCAGAGGTGAAATTCTCGGATTTGTTAAAGACTAACCTATGCGAAAGCATTTGCCAAGGATGTTT	Eukaryota;Alveolata;Ciliophora;Spirotrichea;Hypotrichia;Oxytrichidae;Oxytrichidae_X;Oxytrichidae_X_sp.;	0.728119	19	0	0	0	0	0	0	0	0	0	0	0	0	0	0	0	0	0	0	0	0	0	0	0	0	0	0	0	0	0	0	0	0	0	0	0	0	0	0	0	0	0	0	0	0	0
1642e030f4f979cbbca1f98d6ff2123e	AGCTCCAATAGCGTATATTAAAGTTGTTGCAGTTAAAAAGCTCGTAGTTGGATTTGTGGTGTTCCCTGTGGTCCGATTTCGGTACTTTCGGGGACTGCCATCCTTGGGTGGATCCTGTGTGGCATTAGGTTGTCGCGCAGGGGATGCCCATCGTTTACTGTGAAAAAATTAGAGTGTTCAAAGCAGGCTTACGCCGTTGAATATATTAGCATGGAATAATGAGATAGGACCTTGGTACTATTTTGTTGGTTTGCGCACCGAGGTAATGATTAATAGGGACAGTTGTGGGTATTCGTATTCCATTGTCAGAGGTGAAATTCTTGGATTTCTGGAAGACGAACTAATGCGAAAGCATTTACCAAGGATGTTT	Eukaryota;Stramenopiles;Ochrophyta;Bacillariophyta;Bacillariophyta_X;Raphid-pennate	0.999999	0	0	0	0	0	0	0	0	0	0	0	0	0	0	0	0	0	0	0	0	0	0	0	0	0	0	0	50	0	0	0	0	0	0	0	0	0	0	0	0	0	0	0	33	0	0
164ff3bd7476920db37d911b3476ff7a	AGCTCCAATAGCGTATATTAAAGTTGTTGCAGTTAAAAAGCTCGTAGTTGAATTTGTGGCACCTCCTGGGGTCCTTTTTTTGGTACCGTTGGGAGGCACCATCCTTGGGCAGAATCTGTGTGGCATTAGGTTGTCGTGCAGGGGATGCTCATCGTTTACTGTGAAAAAATTAGCGCGTTCAAAGCAAGCTTATGCTGTTGAATATATTAGCATGGAATAATGAGATAGGACCTTGGTACTATTTTGTTGGTTTGCGCACCGGGGTAATGATTAACAGGGACAGTTGGGGGTATTCGTATTCCATTGTCAGAGGTGAAATTCTTGGATTTCTGGAAGACGAACTACTGCGAAAGCATTTACCAAGGATGTTT	Eukaryota;Stramenopiles;Ochrophyta;Bacillariophyta;Bacillariophyta_X;Raphid-pennate	0.996965	0	0	0	0	0	0	0	0	0	0	0	0	0	0	0	0	0	0	0	0	0	0	0	7	0	0	0	56	0	0	0	0	0	0	0	0	0	0	0	11	0	0	0	0	0	0
165c5b4b0f30bdce96d9ee5359c27b98	AGCTCCAATAGCGTATATTAAAGTTGTTGCAGTTAAAAAGCTCGTAGTTGAAGTTCTGGGCATTGTCTTTTCGGCAACTGCTGGAAAGAGGTGTCCATCCGTATAAGCAACCAAACCCGTTCTTAATTGAATGATTTGGGGATTATACATTTTACTGTGAAAAAATCAGAGTGTTCCAGGCAGGCAATCGCCCTGAATACACAAGCATGGAATAATGGAATTGGCTCCAGCCATTTCATGGTTTAATGGAAGGAGTAATGATTAATAGGGACAGTTGGGGGCATTAGTATTTAATTGTCAGAGGTGAAATTCTTGGATTTATTAAAGACTAACTAGTGCGAAAGCATTTGCCAAGGATGTTT	Eukaryota;Alveolata;Ciliophora;Prostomatea_2;Prostomatea_2_X;Placidae;Placus;Placus_salinus;	0.999997	0	0	0	0	0	0	0	0	0	0	0	0	0	0	0	0	0	0	0	0	0	0	0	0	0	0	0	0	0	0	0	0	37	0	0	0	0	0	0	0	0	0	0	31	0	0
169cb196b981b3b4bed900c968f04956	AGCTCCAATAGCGTATATTAAAGTTGTTGCAGTTAAAAAGCTCGTAGTTGGATTTCTGGTGGGAGTGACCGTTCCGGACTTGATTGTCTGTGTATTGAGTTGTCTCTAGCCATCCTTGTGGAGAACTTTTCTTGCATTAATTTGTAGGGATTGGGACCCACATCGTTTACTGTGAAAAAATTAGAGTGTTTAAAGCAGGCAATCGCTTGAATACATTAGCATGGAATAATAAGATAGGACTTTGGTACTATTTTGTTGGTTTGCATACCAAATTAATGATCAACAGGAACAGTTTGAGGATATTCGTATGAACATGTCAGAGGTGAAATTCTTGGATTTTGATCAGACGAACTACTGCGAAAGCATTTATCAAGGATGTTT	Eukaryota;Stramenopiles;Sagenista;Labyrinthulomycetes;Thraustochytriales;Thraustochytriaceae;Labyrinthuloides;Labyrinthuloides_minuta;	0.756703	0	0	0	0	0	0	0	0	0	0	0	0	0	0	0	0	0	0	0	0	0	0	0	0	0	0	0	0	0	0	0	0	0	0	0	0	0	0	118	0	0	0	0	0	0	0
16a3871752deecbc9f047917d60c8286	AGCTCCAATAGCGTATACTAAAGTTGTTGCAGTTAAAAAGCTCGTAGTTGAACCTCTGGTAGGGCCGACCTTGGCGCGCGGTGAATGCCGCGCTGCTTGAAAGCGTCGTTGCCCGGCCATCCTCCCCCGGTCTTTTGGGCTGGGGGTCGTTTACTGTAAAAAAAATAGAGTGTTCCAAGCAGGGGGTAATATCCCGGTATATAGTAGTATGGAATAATGAGATAGGACTTTGGTACTATTTTGTTGGTTTGCATGCCAAGGTAATGATTAAGAGGGACAGTTGGGGGTATTCGTATTTAGATGTCAGAGGTGAAATTCTTGGATTTTCGAAAGACGAACTACTGCGAAAGCATTTACCAAGGATGTTT	Eukaryota;Stramenopiles;Sagenista;Labyrinthulomycetes;Thraustochytriales;Thraustochytriaceae;Thraustochytrium;Thraustochytrium_aureum;	1	0	0	0	0	0	0	0	0	0	0	0	0	0	0	0	0	0	0	0	0	0	0	0	0	27	26	0	0	0	0	0	0	0	0	35	0	0	0	1167	289	0	2339	0	0	0	0
16c46ea2f53ea62b2b2f3fa8c39d2d80	AGCTCCAATAGCGTATATTAAAGCTGTTGCGGTTAAAAAGCTCGTAGTTGGATTTGAGTCTAGTTGCGGCCGGGCTCAGGGCTTTGACTCTGGGGCGGGCGTGTAGCCTGTATGCGCGCGGGGAGGGGCAGGGAATTTTCTCTGCTTTCTCGTGTGCTTTACTTTGAACAAATTAGAGTGTTTAAAGCAGGCATTTTTTGCCTTGAATACATTAGCATGGAATAACGATTTTGACTGGAGCAGGCATGATGTTGTCTTGATGACTGCGCAGTAATGATGGATAGGGACGGTCGGGGACATTCGTATTGCTCCGTCAGAGGTGAAATTCTTAGATTGGAGGAAGACGAGCTGATGCGAAAGCCTTTGTCAAGGACGTTT	Eukaryota;Apusozoa;Apusomonadidae	1	0	0	0	0	0	0	0	0	0	0	0	0	0	0	0	0	0	0	0	0	0	0	0	0	0	0	0	0	0	0	0	0	0	0	0	0	0	0	0	0	0	0	0	0	0	78
16c8c043e94803e5028bb3424cf6b2e3	AGCTCCAATAGCGTATATTAAAGTTGTTGCAGTTGAAACGCTCGTAGTTGGATGTTTTGTGCCCGCTGTGTGCCCGTTTTTACGAGGAAGTGGGGGGCTTTTGTTCCCTTTTCCTCTGGGGCGCTCTTTGGCGTGGCGCAGCTTTCTCCCGATTGTGTCGTGCGTGCCATTCATTTGGGGCGTGCGGGACGCGGGGCGATTACTTTGAAAAAATTAGAGTGTTCAAAGCAGGCAGTTTTTTGCTTGAATAGATTAGCATGGAATAATGGAATAGGACTTTGGTTTCTATTTTGTTGGTTTTGGGGCCGAAGTAATGATTAATAGGGATAGTTGGGGGCATTAGTATTGCACTGTCAGAGGTGAAATTCTTGGATTTGTGCAAGACTAACGTGTGCGAAA…	Eukaryota;Opisthokonta;Choanoflagellida;Choanoflagellatea;Craspedida;Monosigidae_Group_A;Salpingoeca_A;Salpingoeca_infusionum;	0.998915	0	0	0	0	0	0	0	0	0	0	0	0	0	0	0	0	0	0	0	0	0	0	0	0	0	0	0	0	0	0	0	0	7	0	0	0	0	0	0	0	0	0	0	28	0	0
170db5f89afa4f34f73b050cdb319031	AGCTCCAATAGCGTATATTAAAGTTGTTGCAGTTAAAAAGCTCGTAGTTGAAACTTGGGCCTGGCTGGCGGGTCCGCCTCACCGCGTGCACTCGTCCGGCCGGGCCTTCCTTCTGAAGAACCTCATGCCCTTCACTGGGCGTGTTGGGGAATCAGGACTTTTACTTTGAAAAAATTAGAGTGTTCAAAGCAGGCCTTTGCTCGAATACGTTAGCATGGAATAATAAAATAGGGCGTGCGTTTCTATTTTGTTGGTTTCTAGAGACGCCGCAATGATTAACAGGAACAGTCGGGGGCATCAGTATTCCGTTGTCAGAGGTGAAATTCTTGGATTTACGGAAGACTAACTACTGCGAAAGCATTTGCCAAGGATGTTT	Eukaryota;Opisthokonta;Fungi;Ascomycota;Pezizomycotina;Dothideomycetes	0.999399	0	0	0	0	0	0	0	0	0	0	0	0	0	0	0	0	0	0	0	0	0	0	0	0	0	0	0	0	0	11	0	0	0	0	0	0	0	0	0	0	0	0	0	0	0	0
1733c95ef5aba8474699742163444bfc	AGCTCCAATAGCGTATACTAAAGTTGTTGCAGTTGAAAAGCTCGTAGTTGAATGTCTGGTAGGAGCGACCTGGCCTTGGCCCTCTTTGGGGGTCTCGGAACTGTGTGTCTGTCTCTGGCCATCCTCTCACGCGTCCTCGCAAGGGGAAGAGTGGGTCGTTTACTGTAAAAAAATTAGAGTGTTTCAAGCAAAAAGGTGTTTTGGAATACATTAGTATGGAATAATAAGATAGGACTTTGGTGCTATTTTGTTGGTTTGCACACCAAGGTAATGATTAACAGGGACAGTTGGGGGTATTCGTATTTAATTGTCAGAGGTGAAATTCTTGGATTTATGAAAGACGAACAACTGCGAAGGCATTTACCAAAGATGTTT	Eukaryota;Stramenopiles;Sagenista;Labyrinthulomycetes;Thraustochytriales;Thraustochytriaceae;Thraustochytriaceae_X;Thraustochytriaceae_X_sp.;	0.995692	0	0	0	0	0	0	0	0	0	0	0	0	0	0	0	0	0	0	0	0	0	0	0	0	0	0	0	0	0	0	0	0	0	0	0	0	6	0	0	0	0	0	0	0	0	0
1788c59e45e92bad0d4dfeac06746ec1	AGCTCCAATAGAATATATTAAAGTTGTTGCAGTTAAAAAGCTCGTAGTTGAATTTCTGTCTGTTACGCGCTCGAAGCCATTTGGCGACGGACGCGTGCAGGCATTCTTCTACTCCTGGGGTAACTCAGTGCGGTAGAGCCTTTACTTTGAGAAAATTAGAGTGTTTCAAGCAAGCATCGCTTTGAATACTACAGCATGGAATAATACAATAGGACTTTAGGCCTATTTGTTGGTTTCAGGCCTGAAGTAATGATTAATAGGGACAGTTGGGGGCATTCGTATTGGACAGTCAGCGGTGAAATGCGATGATTTGTTCAAGACGAACTACTGCGAAAGCATTTGCCAAAGATGTTT	Eukaryota;Alveolata;Apicomplexa;Colpodellidea;Colpodellida;Colpodellaceae;Colpodella;Colpodella_sp.;	1	0	0	0	0	0	0	0	0	0	0	0	0	0	0	0	0	0	0	0	0	0	0	35	0	0	0	0	0	0	0	0	0	0	0	0	0	0	0	0	0	0	0	0	0	0	0
1792a739be086a8543c11a042213c3cc	AGCTCCAGAAGCGTATGCTAACGTTGTTGCAGTTAAAAAGCTCGTAGTTGAAGGTTTTTCGGTTGGGTCCGTGGGGCGAACGCTCCGCAGATCGGCCTTTTTCTTTTCCTGGCTCTTTCTTTTGAGGGGGCCTCGTTCACTGTAAACAAATTGGAGTGCTCCACGCAGGTCGTTGGGACCTGGACAATTGTTATGGGATGATGAGATAGGGCTCGGGCACTATTTTGTCGGTTTGCATGCCTGGGTAATGGTGAATAGGAACAGTTGGGGATATTCGTATTTAGCGGTCAGAGGTGAAATTCTTGGATTCGGGAAAGACGAACAACTGCGAAGGCATTTATCAAAGATGTTT	Eukaryota;Stramenopiles;Sagenista;Labyrinthulomycetes;Thraustochytriales;Thraustochytriaceae;Thraustochytriaceae_X;Thraustochytriaceae_X_sp.;	0.943131	0	0	0	0	0	0	0	0	0	0	0	0	0	0	0	0	0	14	0	0	0	0	0	0	0	0	0	0	0	0	0	0	0	0	0	0	0	0	0	0	0	0	0	0	0	0
17a404ce5dfeb29f349b04c8425f3c2c	AGCTCCAATAGCGTATATGTCCTTTGCTGTGGTTAAAAAGCTCGTAGTTGGATTTCTGACAGGTGCGCCTATCCCTCCGTCTTCGGATGTGAGCGCGATGGCCGCGCACCGGTCATCTTTCGCGAGAGCAGTTGTGCCCTTAGTTGGGTTTACGGCTGGGATCGCGGACTTTTACTTTGAAAAAATTAGAGTGTTCAAGGCAGGCGTTTCGCCTGAATAGTCCAGCATGGAATAATAAGATAGGACTTTGGTTCTATTTTGTTGGTTTCTAGGGCCAGAGTAATGATTGATAGGGATAGTTGGGGGTGCTAGTATTGAACGGCCAGCGGTGAAATGCTCGGATTCGTTCAAGACTAACGTATGCGAAAGCGTTCGCCAAGGATGTCT	Eukaryota;Rhizaria;Cercozoa;Endomyxa;Reticulosida;Filoretidae;Filoreta;Filoreta_sp.;	1	0	0	0	0	0	0	0	0	0	0	0	0	0	0	0	0	0	0	0	0	0	0	0	0	0	0	0	0	0	0	0	0	107	0	0	0	0	0	0	0	0	0	0	13	0	0
17a4f4694a8f5c700cca7e27408ac7ea	AGCTCCAATAGCGTATATTAAAGTTGTTGCAGTTAAAAAGCTCGTAGTTGAATTTCTGCCCGCACTCGCCGGTCTCCCAATGGGTTGTACTAGGCGCAGTCGGGCATCCTTGTGGAGATGGCGCGCATTGATTTGTGCGTTCGGATCTGCATCATTTACTGTGAAAAAATTAGAGTGTTTAAAGCAGGCGTTTGCTTGAATACATTAGCATGGAATAATAAGATAGGACTTCGGTCTATTTTGTTGGTTGCGAACCGAGGTAATGATTAATAGGGATAGTTGGGGGTATTCATATTTAATTGTCAGAGGTGAAATTCTTGGATTTATGAAAGATGAACAACTGCGAAAGCATTTACCAAGGATGTTT	Eukaryota;Stramenopiles;Opalozoa;Bicoecea;Bicoecales;Bicoecaceae;Bicosoeca;Bicosoeca_sp.;	1	0	0	0	0	2	0	0	0	0	0	53	182	0	0	0	0	0	0	0	0	0	0	0	0	0	0	0	0	0	0	0	0	0	0	0	0	0	0	0	0	0	0	0	0	0	0
17a64e5e3dbfda6078d31adff1d6c0ab	AGCTCCAATAGCGTACACTAACGTTGTTGCAGTTAAAAAGCTCGTAGTTGAAGTTTGGGTAGGAGCGACCGGGCCTTGGGGCGAATGCCTCATGTTTTGCCTGTGTTGTCTCTGGCCCTCCTCCCTTTTTGTAAAAAAAGGGTCTTTCACTGTAAAAAAATTAGGGTGTTTCAAGCAAAAGTTGTTTTGGAATAGATGAGTATGGGATGATGAGATAGGCTCTCGGTGCTATTTTGTTGGTTTGCACGCCGCGAGAATGATGAACAGGGACAGTTGGGGGTATTCGTATTTACATGTCAGAGGTGAAATTCTTGGATTTTGGAAAGACGAACTACTGCGAAAGCATTTACCAAAGATGTTT	Eukaryota;Stramenopiles;Sagenista;Labyrinthulomycetes;Thraustochytriales;Thraustochytriaceae;Thraustochytriaceae_X;Thraustochytriaceae_X_sp.;	0.999915	0	0	0	0	0	0	0	0	0	0	0	0	0	0	0	0	0	0	0	0	0	0	0	0	0	0	0	0	0	0	0	0	0	0	0	0	0	0	0	0	0	0	0	0	0	0
17ab8ae9f96dde82a16e59e75215dfdc	ACCCCCAAGAGTGTATCTTAATTTTGCTGCAGTTAAAAAGCTCGTAGTTGAATTTCTGATTGGTGAGACCCTCCGGGCGTCTCGCCTTTCATCCGCTTGGAGAAATAGTAGTCAGGTCAAACTGATTATTACAGACCCAGCATTTTACTTTGAAGAAATTAGAGTGTTCCTGGCAGGCCTAGCTGCATATATTAGCATGGGATAATGGAAAAAGACTTGTCTTGTTTTTTTGGTTAACAGATAAGTAATGATTAAAAGGGACAGTCGGGGGCATTCGTACTGAGTGGTCAGAGGTGAAATTCTTAGATTCGCTCAAGACGAACTAATGCGAAAGCATTTGCCAAGGATGTTT	Eukaryota;Alveolata;Ciliophora;Phyllopharyngea;Cyrtophoria_4;Chilodonellidae;Trithigmostoma	0.898928	0	0	0	0	0	0	0	0	0	0	0	0	0	0	0	0	0	0	0	0	0	0	0	0	660	0	0	0	0	0	0	0	0	0	0	0	0	0	0	0	0	0	0	0	0	0
17c4085edff845ce2134a916219fa511	AGCTCCAATAGCGTATATTAAAGTTGTTGCAGTTAAAAAGCTCGTAGTTGGATTTGTGGCGTGTGCCGTGGCGTGGCCGCGCCATCCTTGGGTGGAGTCTGTGTGGCATTAGGTTGTCGTGCAGAGGATGCCCATCGTTTACTGTGAAAAAATTAGAGTGTTCAAAGCAGGCTTACGCCGTTGAATATATTAGCATGGAATAATAAGATAGGTCTTGGGTCCTATTTTGTTGGTTTGCGGGCCTTGGAAATGATTAATAGGGACAGTTGGGGGTATTCGTATTCCATTGTCAGAGGTGAAATTCTTGGATTTCTGGAAGACGAACTACTGCGAAAGCATTTACCAAGGATGTTT	Eukaryota;Stramenopiles;Ochrophyta;Bacillariophyta;Bacillariophyta_X;Raphid-pennate	0.994114	0	0	0	0	0	0	0	0	0	0	0	0	0	0	0	0	0	6	0	5	0	0	0	0	0	0	0	0	0	0	0	0	0	0	0	0	0	0	0	0	0	0	0	0	0	0
18043fd4675e01d7e463fd4d5dda9f85	AGCTCCAATAGCGTATATTAAAGTTGTTGCAGTTAAAAAGCTCGTAGTTGAAACTTGGGCCTGGCTGGCGGGTCCGCCTCACCGCGTGCACTCGTCCGGCCGGGCCTTCCTTCTGAAGAACCTCATGCCCTTCACTGGGCGTGTTGGGGAATCAGGACTTTTACTTTGAAAAAATTAGAGTGTTCAAAGCAGGCCTTTGCTCGAATACGTTAGCATGGAATAATAAAATAGGACGTGCGTTCCTATTTTGTTGGTTTCTAGGAACGCCGTAATGATTAATAGGGACTGTTGGGGCCATTAGTATTCAGTAGTCAGAGGTGAAATTCTTGGATTTACTGAAGACTAACTACTGCGAAAGCATTTGGCAAAGATGTTT	Eukaryota;Opisthokonta;Fungi;Ascomycota;Pezizomycotina;Dothideomycetes;Pleospora;Pleospora_typhicola;	0.949286	0	0	0	0	0	0	0	0	0	0	0	0	0	0	0	0	0	0	0	0	0	0	0	0	0	0	0	0	0	3	0	0	0	0	0	0	0	0	0	0	0	0	0	0	0	0
180982f675fcc0fad4ff54b1731ae88b	AGCTCCAATAGCGTATATTTAAGTTGCTGCAGTTAAAAAGCTCGTAGTTGGATTTCGGGTGGGGCCTGCCGGTCCGCCGTTTCGGTGTGCACTGGCCGGGCCCACCTTGTTGCCGGGGACGAGCTCCTGGGCTTTATTGTCCGGGACTCGGAGTCGGCGAGGTTACTTTGAGTAAATTAGAGTGTTCAAAGCAGGCCACCGCTCTGAATACATTAGCATGGAATAACACGATAGGACTCTGGCCTATCTTGTTGGTCTGTAGGACCGGAGTAATGATTAAGAGGGACAGTCGGGGGCATTCGTATTTCATTGTCAGAGGTGAAATTCTTGGATTTATGAAAGACGAACTACTGCGAAAGCATTTGCCAAGGATGTTT	Eukaryota;Archaeplastida;Chlorophyta;Trebouxiophyceae;Chlorellales;Chlorellales_X;Picochlorum;Picochlorum_sp.;	0.898885	0	0	0	0	0	0	0	0	0	0	0	0	0	0	0	0	0	0	0	0	0	0	0	0	0	0	0	53	0	0	0	0	0	0	0	0	0	0	0	0	0	0	0	0	0	0
184c5ba268dfccc22998f3d0a27887ca	AGCTCCAATAGCGTATATTAAAGTTGTTGCAGTTAAAAAGCTCGTAGTTGGATTTCTGGTGGGAGTGACCGATCCAGACTTGATTGTCTGCGTAGTGAGTTGTCTCCAGCCATCCTTGTGGAGAACTTTTCTTGCATTAATTTGTAGGGATTGGGACCCACATCATTTACTGTGAAAAAATTAGAGTGTTTAAAGCAGGCAATCGCTTGAATACATTAGCATGGAATAATAAGATAGGACTTTGGTACTATTTTGTTGGTTTGCATACCAAACTAATGATCAACAGGAACAGTTTGAGGATATTCGTATGAACATGTCAGAGGTGAAATTCTTGGATTTTGATCAGACGAACTACTGCGAAAGCATTTATCAAGGATGTTT	Eukaryota;Stramenopiles;Sagenista;Labyrinthulomycetes;Thraustochytriales;Thraustochytriaceae;Labyrinthuloides;Labyrinthuloides_minuta;	0.949164	0	0	0	0	0	0	0	0	0	0	0	0	0	0	0	0	0	0	0	0	0	0	0	0	0	0	0	0	0	0	0	0	0	0	0	0	0	0	64	0	0	0	0	0	0	0
18ab097f3e0ef91802864b4d5b0a6ab1	AGCTCCAATAGCGTATATTAAAGTTGTTGCAGTTAAAAAGCTCGTAGTCGAAGTTTGGGCCTAGGGGGCGGGTCTGCCGTAAGGTTTGTACTTGCCTGCTGGGTCTTTTTTCTGGGGCGCGTCGTGTCCTTTGTTGGGTGCGGCGACTAACCAGGACGTTTACTGTGAAAAAATTAGAGTGTTTAAGGCAGGCTTTTAGCTTGAATAGATTAGCATGGAATAATGGAATAGGACTTGGTTCTATTTTGTTGGTTTCTAGGACCTGAGTAATGGTTAATAGGGATAGTTGGGGGCATTAGTATTGAGCAGTCAGAGGTGAAATTCTTGGATTTGCTCAAGACTAACCACTGCGAAAGCATTTGCCAAGGATGTTT	Eukaryota;Opisthokonta;Fungi;Fungi_X;Fungi_XX;Fungi_XXX;Fungi_XXXX;Fungi_XXXX_sp.;	0.940315	0	0	0	0	0	0	0	0	0	0	0	0	0	0	0	0	0	0	0	0	0	0	0	0	0	0	0	0	0	0	0	0	0	0	0	0	0	0	0	0	0	0	0	0	0	0
18b4011c38ce1c9867bdffa68eddd7d8	AGCTCCAATAGCGTATATTAAAGTTGTTGCAGTTAAAAAGCTCGTAGTTGGATTTGTGGTGTGTGCTGTGGCGTCCATTTGTTTGGTTCTGCCGTGGCCGCGCCATCCTTGGGTGGATTCTGCATGGCATTAGGTTGTCGTGTAGAGGATGCCCATCGTTTACTGTGAAAAAATTAGAGTGTTCAAAGCAGGCTTATGCCGTTGAATATATTAGCATGGAATAATAAGATAGGTCTTGGGTCCTATTTTGTTGGTTTGCGGGCCTTGGAAATGATTAATAGGGACAGTTGGGGGTATTCGTATTCCATTGTCAGAGGTGAAATTCTTGGATTTCTGGAAGACGAACTACTGCGAAAGCATTTACCAAGGATGTTT	Eukaryota;Stramenopiles;Ochrophyta;Bacillariophyta;Bacillariophyta_X;Raphid-pennate	0.999158	0	0	0	74	51	250	0	0	0	0	0	0	0	0	0	0	0	277	0	0	17	33	0	4120	1284	1230	19	38	6036	107	544	164	104	77	24	31	0	25	22	20	440	31	167	25	42	29
18ca812b66ed5e359d2b77a384698c8b	AGCTCCAATAGCGTATATTAAAGTTGTTGCAGTTAAAAAGCTCGTAGTTGAATTTCTGGTATAGGTGGCCGACCTTCCACTTGGTGGATTATGCGGTAGCCTTTGCCTTTTTTGAGTTGAGTTTGGGTGGCATTAATTTGTTGCTCTTACAATACTCATCATTTACTGTGAAGAAATTAGAGTGTTCAAAGCAGGCGTAGGCTGTGAATACATTAGCATGGAATAATAAAATAGGACTTTGGTACTATTTTGTTGGTTTACAGACCAAAGTAATGATTAATAGGGACAGTTGGGGATATTCGTATTTCAGTGTCAGAGGTGAAATTCTTGGATTTCTGAAAGACGAACTACTGCGAAAGCATTTATCAAGGATGTTT	Eukaryota;Stramenopiles;Ochrophyta;Bacillariophyta;Bacillariophyta_X;Radial-centric-basal-Coscinodiscophyceae;Melosira	1	0	0	23	0	0	0	0	0	0	0	0	0	0	0	0	0	0	0	0	0	0	0	0	0	0	0	0	0	0	0	0	0	0	0	0	0	0	0	0	0	0	0	0	0	0	0
18cadea6341d23ab4d4b45be61186ecf	AGCTCCAATAGCGTATATTAAAGTTGTTGCAGTTAAAAAGCTCGTAGTTGGATTTCTGGTGGGAGTGACCGTTCCGGACTTGATTGTCTGTGTATTGAGTTGTCTCCAGCCATACTTGTGGAGAACTTTTCTTGCATTAATTTGTATGGATTGGGACCCACATCGTTTACTGTGAAAAAATTAGAGTGTTTAAAGCAGGCAATCGCTTGAATACATTAGCATGGAATAATAAGATAGGACTTTGGTACTATTTTGTTGGTTTGCATACCAAATTAATGATCAACAGGAACAGTTTGAGGATATTCGTATGAACATGTCAGAGGTGAAATTCTTGGATTTTGATCAGACGAACTACTGCGAAAGCATTTATCAAGGATGTTT	Eukaryota;Stramenopiles;Sagenista;Labyrinthulomycetes	1	0	0	0	0	0	0	0	0	0	0	0	0	0	0	0	0	0	0	0	0	0	0	0	0	0	0	0	0	0	0	0	0	0	0	0	0	0	0	86	0	0	0	0	0	0	0
18cb0f1c4697f9990bbd27249b5ec81f	AGCTCCAATAGCGTATATTAAAGTTGTTGCAGTTAAAAAGCTCGTAGTTGGATTTGTGGTGTCTCCTGTGGTCCGTACTATTCGGTACCGTGGGAGCTACCATCCTTGGGTGGAACCTGTGTGGCATTAGGTTGTCGCGCTGGGGATGCCCATCGTTTACTGTGAAAAAATTAGAGTGTTCAAAGCAGGCTTATGCCGTTGAATATATTAGCATGGAATAATAAGATAGGACCTTGGTACTATTTTGTTGGTTTGCGCACCGAGGTAATGATTAATAGGGACAGTTGGGGGTATTCGTATTCCATTGTCAGAGGTGAAATTCTTGGATTTTTGGAAGACGAACTACTGCGAAAGCATTTACCAAGGATGTTT	Eukaryota;Stramenopiles;Ochrophyta;Bacillariophyta;Bacillariophyta_X;Raphid-pennate	0.797526	0	0	0	0	0	0	0	0	0	0	0	0	0	0	0	0	0	0	0	0	0	0	0	0	0	0	0	0	0	0	0	0	0	0	0	0	0	0	0	0	0	0	0	49	0	0
18e2ac3852c529b0c19329c4d3d0668c	AGCTCCAATAGCGTATATTAAAGTTGTTGCAGTTAAAAAGCTCGTAGTTGGATTTCTGGTGGGAGCGATCGGTCTGGCGCTTAGCGCGAGTACTTGCATCGTCTCCGGCCATCCTTGGGGAGAGTCTGTCTGGCATTAAGTTGTCGGGCAGAGGATCCTCATCGTTTACTGTGAAAAAATTAGAGTGTTCAAAGCAGGCTTATGCCGTTGAATATATTAGCATGGAATAATAAGATAGGACTTTGGTACTATTTTGTTGGTTTGCGCACCAAAGTAATGATTAATAGGGACAGTTGGGGGTATTCGTATTCCGTTGTCAGAGGTGAAATTCTTGGATTTACGGAAGACGAACTACTGCGAAAGCATTTACCAAGGATGTTT	Eukaryota;Stramenopiles;Ochrophyta;Bacillariophyta;Bacillariophyta_X;Polar-centric-Mediophyceae;Minutocellus;Minutocellus_polymorphus;	0.737111	0	0	0	9	0	0	0	0	0	0	0	0	0	0	0	0	0	0	0	0	0	0	0	0	0	0	0	0	0	0	0	0	0	0	0	0	0	0	0	0	0	0	0	0	0	0
18f8104e662d50e6fcee5c41b9e304e4	AGCTCCAATAGCGTATATTAAAGTTGTTGCAGTTAAAAAGCTCGTAGTTGGATTTCTGGATGGATGCCGATGCCCGCCTGTAGGCGTGTGCAAAGGTGCCCGTTCATCCTTCTGTTAAGGTTTCTTAGTATTTATTTACTGGTTTCCGGCTCAGATATTTTACCTTGAGTAAATTAGAGTGTTTCAGGCAGGCTTGGTTCTGAATACATTAGCATGGAATAATAGAATAGGATTCCATATCCTTTGTTGGTTTCCGGATGTGGAGTAATGATTAATAGGGATAGTTGGGGGCATTAGTATTTAATTGTCAGAGGTAAAATTCTTGGATTAATTAAAGACTAACTTATGCGAAAGCATTTGCCAAGGATGTTT	Eukaryota;Alveolata;Ciliophora;Spirotrichea;Euplotia;Uronychiidae;Diophrys	0.999996	0	0	0	0	0	0	0	0	0	0	0	0	0	0	0	0	0	0	0	0	0	0	0	0	0	0	0	0	0	0	0	0	0	0	0	0	0	0	0	0	0	0	0	0	0	0
193fc82d6a21a12f7351b97b5a4e2f27	AGCTCCAATAGCGTATATTAAAGTTGTTGCAGTTAAAAAGCTCGTAGTTGGATTTCTGGTGATAGCGACCATTCATGACTTGATTGTCATTGTGATGTGTTGCCTGTCGCCATCCTCGTAGAGATTGTTTCTGGCATTAATTTGTTGGATTCGGGACCTACGTCATTTACTGTGAAAAAATTAGAGTGTTTAAAGCAGGCAATTGGCTTGAATACATTAGCATGGAATAATAAGATAGGACTTTGGTGCTATTTTGTTGGTTTGCACATCAAGGTAATGATTAACAGAAACAGTCGGGGATATTAGTATGTAAATGTCAGAGGTGAAATTCTTGGATTTTTTACAGACTAACTACTGCGAAAGCATTTATCAAGGATGTTT	Eukaryota;Stramenopiles;Sagenista;Labyrinthulomycetes;Labyrinthulales;Labyrinthulaceae;Labyrinthulaceae_X;Labyrinthulaceae_X_sp.;	0.998032	0	0	0	0	0	0	0	0	0	0	0	0	0	0	0	0	0	0	0	0	0	0	0	0	0	0	0	0	0	0	0	0	0	0	0	0	0	0	0	0	0	0	0	0	0	0
19898f7cce42a9ddb70cb895accbc165	AGCTCCAATAGCGTATATTAAAGTTGTTGCAGTTAAAAAGCTCGTAGTTGGATATCTGGTGGGAGCAATGGGTCTCGCACTCTGTGCGGGTACTTCAATTGACTCCGGCCATCCTTGGGGAGAGCCTGTGTGGCATTAGGTTGTCGTGCAGGGGATCCCCATCGTTTACTGTGAAAAAATTAGAGTGTTCAAAGCAGGCTTATGCCGTTGAATATATTAGCATGGAATAATAAGATAGGTCTTGGGTCCTATTTTGTTGGTTTGCGGGCCTTGGAAATGATTAATAGGGACAGTTGGGGGTATTCGTATTCCATTGTCAGAGGTGAAATTCTTGGATTTACGGAAGACGAACATCTGCGAAAGCATTTGCCAAGGATGTTT	Eukaryota;Stramenopiles;Ochrophyta;Bacillariophyta;Bacillariophyta_X;Polar-centric-Mediophyceae;Odontella	0.960271	0	0	0	0	0	0	0	0	0	0	0	0	0	0	0	0	0	0	0	0	0	0	0	0	0	0	0	0	0	0	2	0	0	0	0	0	0	0	0	0	0	0	0	0	0	0
19a40d005d255b57a3316f9f5180ac57	ATCTCCAATAGTGTATACTAAAGTTGCTGCAGTTAAAAAGCTCGTAGTTGGATTTCGGTTAACGAACAATTAGTCTACACAACATGTGTACGAACTGGTTGATCGTTTCCTTCTTGTCAGATACACCTTTTTTGGGTGTTCTGAATCTTTTACTTTGAGAAAATTAGAGTGTTCAAAGCAGGCGTAACCAAGCCTTTGAATATATTAGCATGGGATAATGGAATAAGACTTTTTGGCTTATTTTCGTTGGTTCTTTAGGCCTTAAGTAATGATTAATAGGGATAGTTGGGGTCATTAGTATTTAATAGTCAGAGGTGAAATTCTAAGATTTATTAAAGACTAACTACTGCGAAAGCATTTGACAAGGATGTTT	Eukaryota;Amoebozoa;Lobosa;Tubulinea;Leptomyxida;Flabellulidae;Flabellula;Flabellula_sp.;	0.999928	0	0	0	0	0	0	0	0	0	0	0	0	0	0	0	0	0	0	0	0	0	257	0	0	0	0	0	0	0	0	0	0	0	0	0	0	0	0	0	0	0	0	0	0	0	0
19ae84344f5e0544cfbbac17ea49a153	AGCTCCAATAGCGTATATTAAAGTTGTTGCAGTTAAAAAGCTCGTAGTTGGATTTGTGGTGTCTCCTGTGGTCCGTACTATTCGGTACCGTGGGAGCTACCATCCTTGGGTGGAACCTGTGTGGCATTAGGTTGTCGCGCTGGGGATGCCCATCGTTTACTGTGAAAAAATTAGAGTGTTCAAAGCAGGCTTATGCCGTTGAATATATTAGCATGGAATAATGAGATAGGACCTTGGTACTATTTTGTTGGTTTGCGCACCGAGGTAATGATTAATAGGGACAGTTGTGGGTATTCGTATTCCATTGTCAGAGGTGAAATTCTTGGATTTCTGGAAGACGAACTAATGCGAAAGCATTTACCAAGGATGTTT	Eukaryota;Stramenopiles;Ochrophyta;Bacillariophyta;Bacillariophyta_X;Raphid-pennate	0.997539	0	0	0	0	0	0	0	0	0	0	0	0	0	0	0	0	0	0	0	0	0	0	0	0	0	0	0	0	0	0	0	0	1	0	0	0	0	0	0	0	0	0	0	0	0	0
19bc14a68493d4d24b3cc7232168014b	AGCTCCAATAGCGTATATTAAAGTTGTTGCAGTTAAAAAGCTCGTAGTTGAAGCCAAGGAAAACAGACTAGAGAAATCTCCGGTCTGTCTTTCCACTTCTCGCAAAGACGCCTTCTCATATTAATTTATGGGTTGGTTGAGTTGCGTCGTTTACTGTGAACAAATTAGGGTGTTTAAAGCAAGTCTATGTTTGAATACACTAGCATGGAATAATAAGATATGACCAAAGTAGTATTTTGTTGGTGACCATTTTGGTAATGATTGAAAGAAACTGTTGTGGGTATTCGTATGAGCATGTCAGAGGTGAAATTCTTGGATTTTGATCAGACGAACTACTGCGAAAGCATTTACCAAGGATGTTT	Eukaryota;Stramenopiles;Sagenista;Labyrinthulomycetes;Labyrinthulales;Labyrinthulaceae;Labyrinthula;Labyrinthula_sp.;	0.936776	0	0	0	0	0	0	0	0	0	0	0	0	0	0	0	0	0	0	0	0	0	0	0	0	0	0	0	0	0	0	0	0	0	0	0	0	0	0	0	0	0	0	0	0	0	0
19d938e18966ad72726aec932f79a921	AGCTCCAATAGCGTATATTAAAGTTGTTGCAGTTAAAAAGCTCGTAGTTGAAATTCTGGTTGCTAAGGCCTCTAGTCTTCGGACGGAGGTGCTTACAGCCATCCGCTTGTAAACATATGTACACTCTTCACTGGGTGGCTATGTGAGCAAGCATTTTACCTTGAGAAAAACAGAGTGTTCCAGGCAGGCTTGTCCGGAATGCATTAGCATGGAATAATAGAATATGACTGAGGTCTATTTATTGGTTTAAGGCCACAGTAATGATTAATAGGAACAGTCGGGGGCATTAGTACTTGACAGTCAGAGGTGAAATTCTTGGATTTGTCAAAGACTAACTGATGCGAAAGCGTTTGTCAAGGATGTTT	Eukaryota;Alveolata;Ciliophora;Oligohymenophorea;Peritrichia_2;Vaginicolidae;Vaginicolidae_X;Vaginicolidae_X_sp.;	1	0	0	0	0	0	0	0	0	0	0	0	0	0	0	0	0	0	0	0	0	0	0	0	0	0	0	0	0	0	0	0	0	0	0	0	0	0	0	0	0	0	0	0	0	0	0
19dc9d613cd2f93da5377e3bbb24cebd	AGCTCCAATAGCGTATATTAAAGTTGTTGCAGTTAAAAAGCTCGTAGTTGGATTTCTGTGAGAGTGCCTGCCTCGGCCTGATGGCTCGTGGGCAGCGCTCTTACATCCTTCTGTTAACTGTTCTTGGCTTTCATTTGCTGGTACAGGGCTCAGATATTTTACCTTGAGAAAATTAGAGTGTTTCAGGCAGGCTTATGCACGGAATACATTAGCATGGAATAATGGAATAGGACCTGTGCGTCTCTCGGGGCGCCGGTCTCTGTTGTTGGTTTCGGGGACTAAAGTAATGATTAATAGGGATAGTTGGGGGCATTAGTATTTAATAGTCAGAGGTGAAATTCTCGGATTTGTTAAAGACTAACTTATGCGAAAGCATTTGCCAAGGATGTTT	Eukaryota;Alveolata;Ciliophora;Spirotrichea;Hypotrichia;Holostichidae;Holosticha	0.999988	0	0	0	0	0	0	0	0	0	0	0	0	0	0	0	0	0	0	0	0	0	0	0	0	0	0	0	0	0	0	0	0	423	0	0	0	0	0	0	0	0	0	0	0	0	0
1a16a78ab6e4ae6b04b3f57272af1018	AGCTCCAATAGCGTATATTAAAGTTGTTGCAGTTAAAAAGCTCGTAGTTGTATTTGTGGCGTGCGTTAGGCTCTCTTTCCCTCAGGGGATTTGGTGTTGCCTGGTGTTGCCATCCTTGGGTGGAACCTGTGTGGCATTAGGTTGTCGTGCAGGGGATGCCCATCGTTTACTGTGAAAAAATTAGAGTGTTCAAAGCAGGCTTATGCCGTTGAATATATTAGCATGGAATAATGAGATAGGACCTTGGTACTATTTTGTTGGTTTGCGCACCGAGGTAATGATTAATAGGGACAGTTGTGGGTATTCGTATTCCATTGTCAGAGGTGAAATTCTTGGATTTCTGGAAGACGAACTAATGCGAAAGCATTTACCAAGGATGTTTTCATTAATCAAGAACGA…	Eukaryota;Stramenopiles;Ochrophyta;Bacillariophyta;Bacillariophyta_X;Raphid-pennate	0.994818	0	0	0	0	2	0	0	0	0	0	0	0	0	0	0	0	0	0	0	0	0	0	0	0	0	0	0	0	0	0	0	0	0	0	0	0	0	0	0	0	0	0	0	0	0	0
1a44196502380f20a4da841fda4810d5	AGCTCCAATAGCGTATATTAAAGTTGTTGCAGTTAAAAAGCTCGTAGTTGGATTTCTGTGAGAGTGCCGGTGTCGGCTGATGCTTGTACGCAGGCGCTCTTACATCCTTCTGTTAACTGATCTTGGCATTTTATTGCTGGTTCAGGGCTCAGATATTTTACCTTGAGAAAATTAGAGTGTTTCAGGCAGGCTTATGCCGGAATACATTAGCATGGAATAATGGAATAGGACCTGTGCGTCTTTATGGCGCCGGTCTCCGTTGTTGGTTTCGGGGACTAATGTAATGATTAATAGGGATAGTTGGGGGCATTAGTATTTAATAGTCAGAGGTGAAATTCTCGGATTTGTTAAAGACTAACTTATGCGAAAGCATTTGCCAAGGATGTTT	Eukaryota;Alveolata;Ciliophora;Spirotrichea;Hypotrichia;Holostichidae;Holosticha;Holosticha_diademata;	0.887015	0	0	0	0	0	0	0	0	0	0	0	0	0	0	0	0	0	0	0	0	0	0	0	0	0	0	0	0	0	0	0	0	0	0	0	0	0	0	0	0	0	0	0	0	0	0
1a4c460980541e7569a86d994da8a744	AGCTCCAATAGCGTATCTTAATGTTGTTGCAGTTAAAAAGCTCGTAGTCGAACCTCTGGGCCGGGCCGGCGTCCCCTGGACTGCCATCGTCCGAGTTCATCCGTCTGGGGACTTGTTTGCAGTTCATTCTGCGGCATGCACAACCAGGCGCTTTACTTTGAAGAAATTAGAGTGTTTCAGGCAGGCTTTCGCTTGTATACACCAGCATGGAATAATAGAAAAGGACTGCTTTTATTTTATTGGTACATTAGAAGTAGTAATGATTAACAGGAACAGTTGGGGGCATTCGTATTTAGTAGTTAGAGGTGAAATTCTTGGATTTACTAAGGACGAACTAATGCGAAAGCATTTGCCAAGGATGTTT	Eukaryota;Alveolata;Ciliophora;Phyllopharyngea;Cyrtophoria_2;Lynchellidae_1;Chlamydonellopsis;Chlamydonellopsis_calkinsi;	0.939974	0	0	0	0	0	0	0	0	0	0	0	0	0	0	0	0	0	0	0	0	0	0	0	0	0	0	0	0	0	0	0	0	0	10	0	0	0	0	0	0	0	0	0	0	0	0
1a58997da5891dad2c98d6105ce62667	AGCTCCAATAGCGTATATTAAAGTTGTTGCAGTTAAAAAGCTCGTAGTTGGACTTGTGGTTCTCCCCGAGGTCCAATTTTGGTACTTTTGGGGAGTCCCATCCTTGGGTGGATCCTGTGTGGCATTAGGTTGTCGTGCAGGGGATGCCCATCGTTTACTGTGAAAAAATTAGAGTGTTCAAAGCAGGCTTACGCCGTTGAATATATTAGCATGGAATAATAAGATAGGACCTTGGTACTATTTTGTTGGTTTGCGCACCAAGGTAATGATTAATAGGGACAGTTGGGGGTATTCGTATTCCATTGTCAGAGGTGAAATTCTTGGATTTTTGGAAGACGAACTACTGCGAAAGCATTTACCAAGGATGTTT	Eukaryota;Stramenopiles;Ochrophyta;Bacillariophyta;Bacillariophyta_X;Raphid-pennate	0.984978	2	1	0	2	0	1	1	1	0	0	0	0	0	0	0	0	0	0	2	0	0	0	0	0	0	0	0	0	0	0	0	0	0	0	0	0	0	0	0	0	0	0	0	0	0	0
1a61d302d2d4b79f8cbfdcbae081ddb0	AGCTCCAATAGCGTATATTAAAGTTGTTGCAGTTAAAAAGCTCGTAGTTGGATTTCTGGTGGGAGTGACCGTTCCGGACTTGATTGTCTGTGTATTGAGTTTTCTCCAGCCATCCTTGTGGAGAACATTTCTTGCATTAATTTGTAGGGATTGGGACCCACATCGTTTACTGTGAAAAAATTAGAGTGTTTAAAGCAGGCAATCGCTTGAATACATTAGCATGGAATAATAAGATAGGACTTTGGTACTATTTTGTTGGTTTGCATACCAAATTAATGATCAACAGGAACAGTTTGAGGATATTCGTATGAACATGTCAGAGGTGAAATTCTTGGATTTTGATCAGACGAACTACTGCGAAAGCATTTATCAAGGATGTTT	Eukaryota;Stramenopiles;Sagenista;Labyrinthulomycetes;Thraustochytriales;Thraustochytriaceae;Labyrinthuloides;Labyrinthuloides_minuta;	0.95226	0	0	0	0	0	0	0	0	0	0	0	0	0	0	0	0	0	0	0	0	0	0	0	0	0	0	0	0	0	0	0	0	0	0	0	0	0	0	435	0	0	1608	0	0	0	0
1a705112eef99496cca1b6be3d609595	AGCTCCAATAGCGTATATTAAAGTTGTTGCAGTTAAAAAGCTCGTAGTTGGATTTCTGGTGGGAGTGACCGTTCCAGACTTGATTGTCTGTGTATTGAGTTGTCTCCAGCCATCCTTGTGGAGAACTTTTCTTGCATTAATTTGTAGGGATTGGGACCCACATCGTTTACTGTGAAAAAATTAGAGTGTTTAAAGCAGGCAATCGCTTGAATACATTAGCATGGAATAATAAGATAGGACTTTGGTACTATTTTGTTGGTTTGCATACCAAATTAATGATCAACAGGAACAGTTTGAGGATATTCGTATGAACATGTCAGAGGTGAAATTCTTGGATTTTGATCAGACGAACTACTGCGAAAGCATTTATCAAGGATGTTT	Eukaryota;Stramenopiles;Sagenista;Labyrinthulomycetes;Thraustochytriales;Thraustochytriaceae;Labyrinthuloides;Labyrinthuloides_minuta;	0.891246	0	0	0	0	0	0	0	0	0	0	0	0	0	0	0	0	0	0	0	0	0	0	0	0	0	0	0	0	0	0	0	0	0	0	0	0	87	0	695	0	0	0	0	0	0	0
1a74d8fd0a300314f3a17c32ce3e831d	AGCTCCAAAAGTGTATCTTAATGTTGTTGCAGTTAAAAAGCTCGTAGTTGAACTTCTGGCGCTGCCGCAGTCCCTTCTGGGACTATACGGGGGCGTCATCCGCTCGGAAAGGCATTCTGTCGAGAGACGTGTGTCGGAACGGGCATTTTACTTTGAAGAAATTAGAGTGTTCCAGGCAGGCCTTTGCTTGAATATATCAGCATGGAATAATGGAATAGGATTACTCCTTTGGTTTTAGGAGTTTTAATGATTAACAGGGACAGTTGGGGGCATTCGTATTCATTTGTCAGAGGTGAAATTCTTGGATTAGATGAAGACGAACTAATGCGAAAGCATTTGCCAAGGATGTTT	Eukaryota;Alveolata;Ciliophora;Phyllopharyngea;Cyrtophoria_5;Chlamydodontidae;Chlamydodon;Chlamydodon_paramnemosyne;	0.999768	0	0	0	0	0	0	0	0	0	0	0	0	0	0	0	0	0	0	0	0	0	0	0	0	0	0	0	0	0	0	0	0	0	0	0	0	0	0	0	0	0	0	0	0	0	0
1a83d8c942e86a8659a7cd7b3c81dcc0	AGCTCCAATAGCGTATATTAAAGTTGTTGCAGTTAAAAAGCTCGTAGTTGGATTTGTGGCCAGTGCCGTGGCGTCCATTTATTTGGTTCAGCCGTGGCCTTGCCATCCTTGGGTGGATCCTGTGTGGCATTAGGTTGTCGTGCAGGGGATGCCCATCGTTTACTGTGAAAAAATTAGAGTGTTCAAAGCAGGCTTATGCCGTTGAATATATTAGCATGGAATAATAAGATAGGTCTTTGGTCCTATTTTGTTGGTTTGCGGGCCGGAGAAATGATTAACAGGGACAGTTGGGGGTATTCGTATTCCATTGTCAGAGGTGAAATTCTTGGATTTCTGGAAGACGAACTACTGCGAAAGCATTTACCAAGGATGTTT	Eukaryota;Stramenopiles;Ochrophyta;Bacillariophyta;Bacillariophyta_X;Raphid-pennate;Prestauroneis;Prestauroneis_integra;	0.746128	0	0	0	0	0	0	0	0	0	0	0	0	0	0	0	0	0	0	0	0	0	0	0	0	0	0	0	19	0	0	0	0	0	0	0	0	0	0	0	0	0	0	0	0	0	0
1af8f1fe52ae53da078e0b57752b8974	AGCTCCAATAGCGTATATTAATGTTGTTGCAGTTAAAAAGCTCGTAGTTGAATTTAGGAGGGTTAACCTTCCTGTCTGCACTCCTCATGGCAACTGATATTGCTATGTGGAACAGACTTTTACTGTGAGAAAACTAAAGTGCTCAAAGCAGGCTAACGCTTGAATATTAAAGCATGGAATAATAAAATAGGACTTAATTCTATTATTGGTCATTGGATTAAGTAATGATTAACAGAAACAGTTGGGGGCATTCGTATTTAATTGTCAGAGGTGGAATTCTTGGATTAATTAAAGACGAACTAGTGCGAAAGCATTTGCCAAGGATGTGTTCATCAATCAAGAACGAA	Eukaryota;Alveolata;Ciliophora;Phyllopharyngea;Suctoria;Ephelotidae;Ephelota;Ephelota_gigantea;	0.97242	0	0	0	0	0	0	0	0	0	0	0	0	0	0	0	0	0	0	0	0	5	0	0	0	0	0	0	0	0	0	0	0	0	0	0	0	0	0	0	0	0	0	0	0	0	0
1b1021c7008b6a03aea515c812432b6c	AGCTCCAATAGCGTATATTAAAGTTGTTGCAGTTAAAAAGCTCGTAGTCTGAGTCTTGGTTGGCGGTGAGCCGTCGTGGCTGCCTTTTTTGGGCTGGTCACGCACATGCGATACCCGCTGGCCGATTGTACTTCGGAGGAACGCGGGTGCTTTTCATTAAGTGTCCGTTTGGGATTCCGATAGTTTACTTTGAGAAAAATAGAGTGTTCAAAGCAGGCGTTTTTGCCAATCTTTTGAATACATTAGCATGGGATAATGGAATAGGACATTGGTTCTATTTTGTTGGTTTACGGACCGATGTAATGATTAACAGGAACAGTTGGGGACATTTATATTCCATGGCTAGAGGTGAAATTCTTGGATTCATGGAAGATAAACTACTGCGAAAGCATTTGTCAA…	Eukaryota;Hacrobia;Centroheliozoa;Centroheliozoa_X	1	0	0	0	0	0	0	0	0	0	0	0	0	0	0	0	0	0	0	0	0	0	0	0	0	0	0	0	0	0	0	0	0	0	0	0	0	0	0	0	0	0	0	0	0	0	4
1b3da3c6051c66d3c2abd5e5d8f8f649	AGCTCCATCAGTGTATATTAACGTTGTTGCGGTTAAAAAGCTCGTAGTTGGATTTCGGAGCATGGGACTCAAGGCCAGTCAAATTGACTGTGCCCGAGGAACATCTCCTAGCTTAGGGTAACAGCCTCGCTTCCTTTGCGGGTTGCGATGTGCCGTTCCCTATCATTTACTTTGATAAAATCAGAGTGTTCAAAGCAGGCGTGTTGCCTTGAATGTTGCCGCAAGGGATAATAGAATATGACTTCGGTCCTATTTTGTTGGTTTCTAGGGCTGAAGTAATGACTAATAGGGACAGTTGGGGGCGCTCGTATTGAGTTGTCAGAGGTGAAATTCTAGGATTTACTCAAGACGAACTACTGCGAAAGCATTCGCCAAGGATGTTT	Eukaryota;Amoebozoa;Lobosa;Tubulinea;Nolandida;Nolandellidae;Nolandella	0.999998	0	0	0	0	0	0	0	0	0	0	0	0	0	0	0	0	0	0	0	0	0	0	0	0	0	0	0	0	0	0	0	0	110	0	0	0	0	0	0	0	0	0	0	30	0	0
1b4daf437734cff4cd2803341c811769	AGCTCCAATAGCGTATATTAAAGTTGTTGCAGTTAAAAAGCTCGTAGTTGGATTTCTGGTGGGAGAGACCGTTCCGGACTTGATTGTCTGCGTATTGAGTTGTCTCCAGCCATCCTTGAGGAGAACTTTTCTTGCATTAATTTGTAGGGATTGGGACCCACATCGTTTACTGTGAAAAAATTAGAGTGTTTAAAGCAGGCAATCGCTTGAATACATTAGCATGGAATAATAAGATAGGACTTTGGTACTATTTTGTTGGTTTGCATACCAAATTAATGATCAACAGGAACAGTTTGAGGATATTCGTATGAACATGTCAGAGGTGAAATTCTTGGATTTTGATCAGACGAACTACTGCGAAAGCATTTATCAAGGATGTTT	Eukaryota;Stramenopiles;Sagenista;Labyrinthulomycetes;Thraustochytriales;Thraustochytriaceae;Labyrinthuloides;Labyrinthuloides_minuta;	0.748468	0	0	0	0	0	0	0	0	0	0	0	0	0	0	0	0	0	0	0	0	0	0	0	0	0	0	0	0	0	0	0	0	0	0	0	0	0	0	114	0	0	0	0	0	0	0
1b60c27a3eb6036d46fd5b094773da66	AGCTCCAATAGCGTATATTAAAGTTGTTGCAGTTAAAAAGCTCGTAGTTGGACCTCGGGTTGGGGCAGCCGGTCCGCCCCCTTGGGGGGTGTGCACTGTGTGCTGGCCCCGACCTTTCTCGCGTTGAGCGGTTCTGACATTAAGTTGTTGGGGCTGTGGGGCGCGTCGTTTACTGTGAGCAAAATAGAGTGTTCAAAGCAGGCTTAGGCCTTGAATACATTAGCATGGAATAATGAGATACGACCTTGGTCCTATTTTGTTGGTTTGCGTTCCGAGGTAATGATTAATAGGGACAGTTGGGGGTATTCGTATTCAATTGTCAGAGGTGAAATTCTTGGATTTATGGAAGACGGACTAATGCGAAAGCATTTACCAAGGATGTTT	Eukaryota;Stramenopiles;Ochrophyta;Synchromophyceae;Synchromadales;Synchromaceae;Synchroma;Synchroma_pusillum;	1	0	0	0	0	0	0	0	0	0	0	0	0	0	0	0	0	0	0	0	0	0	0	0	0	0	0	0	0	0	11	0	0	0	0	0	0	0	0	0	0	0	0	0	0	0	0
1b7c7ef313fca7e1875cab6ed7e1227f	AGCTCCAATAGCGTATATTAAAGTTGTTGCAGTTAAAAAGCTCGTAGTTGGATTTCTGGTAGGCCGACCTGGTCCGCCCCGATAAGGTGGTGAGTACCGGAGCCAGTCTGCCATCCTTCTAGGGAGTGCACCTACCCTTGATTGGGCCGGGTGTTCGACCTGGATCGTTTACTTTGAAGAAATTAGAGTGTTTAAAGCAGGCTTATCGCTTTGAATATATTAGCATGGAATAATAAGATAGGACTCTGATCCTATTTTGTTGGTTTCTAGGACTAGAGTAATGATTAATAGGGACAGTTGGGGGTGCTGGTATTTAACGGCCAGAGGTGAAATTCTTGGATTCGTTAAAGACCAACTTATGCGAAAGCATTCACCAAGGATGTCT	Eukaryota;Rhizaria;Cercozoa;Filosa-Granofilosea;Cryptofilida;Nanofilidae;Nanofila;Nanofila_sp.;	0.999999	0	0	0	0	0	0	0	0	0	0	0	0	0	0	0	0	0	0	0	0	0	0	0	0	0	0	0	0	0	0	0	0	0	0	0	0	0	0	0	0	0	0	13	0	0	0
1b91fcf816f15414c2c583f8de2bd3b3	AGCTCCAATAGCGTATATTAAAGTTGTTGCAGTTAAAAAGCTCGTAGTTGGATTTCTGGTAGGGTGCCAATGTCCGCCGCCGTGCGAGCGCAGCGGCGCCCTACCATCCTTCTGTCAACGCCTCTCGACCTTCGCTGGTCGGTGGCGGGCCCAGATATTTTACCTTGAGAAAATTAGAGTGTTTCAGGCAGGCTAGGCCGGAATACATTAGCATGGAATAATAGAATAGGACTAAGGTCTCTTTGTTGGTTTGAGGGACTGTAGTAA	Eukaryota;Alveolata;Ciliophora;Spirotrichea;Strombidiida;Strombidiidae;Strombidium;Strombidium_sp.;	1	0	0	0	0	0	0	0	0	0	0	0	0	0	0	0	0	0	0	0	0	0	0	0	0	0	0	0	0	0	0	0	0	0	0	0	0	0	0	0	0	0	0	0	0	0	0
1b9f5bef253c074e59fefa7a4dc0e2c6	AGCTCCAATAGCGTATATTAAAGTTGTTGCAGTTAAAAAGCTCGTAGTTGAAATTTTGATTGTAGCGGTCAGTCTCACAACAGTGAGTGCTAGATGTGCTGTGGTCATGTTTCGTTGGAACGTGTGTGGCATTGAGTTGTCGTGCATGGGAAGACGATCGTTTACTGTGAAAAAATTAGAGTGTTCAAAGCAGGCTTATGCCGTTGAATATATTAGCATGGAATAATAAGATAGGTCTTGGGTCCTATTTTGTTGGTTTGCGGGCCTTGGAAATGATTAATAGGGACAGTTGGGGGTATTCGTATTCCATTGTCAGAGGTGAAATTCTTGGATTTCTGGAAGACGAACTACTGCGAAAGCATTTACCAAGGATGTTT	Eukaryota;Stramenopiles;Ochrophyta;Bacillariophyta;Bacillariophyta_X;Araphid-pennate;Striatella;Striatella_unipunctata;	0.998633	0	0	0	0	0	0	0	0	0	0	0	0	0	0	0	0	0	0	0	0	0	0	0	0	0	0	0	0	1	0	0	0	0	0	0	0	0	0	0	0	0	0	0	0	0	0
1bdc04fdb31dfd95c92c265d12abdefa	AGCTCCAATAGCGTATACTAAAGTTGTTGCAGTTAAAAAGCTCGTAGTTGAATTTCTGGTCGTGGCAATCGGTCAGCCCCTCACGGGGTTCGTACCAGGTTGCTGCGTCCATCCTCGGGGAGAGCACATCGGGCATTCAGTTGTCTGGTGTGGGATCCTCGTCATTTACTGTGAGCAAAATAGAGTGTTCAAAGCAGGCTTAGGCCGTTGAATACATTAGCATGGAATAATAAGATAGGACCTTGGTCTATTTTGTTGGTTTGTACTCCAAGGTAATGATTAATAGGGATAGTTGGGGGTATTCGTATTCAATTGTCAGAGGTGAAATTCTTGGATTTATGGAAGACGAACTACTGCGAAAGCATTTACCAAGGATGTTT	Eukaryota;Stramenopiles;Ochrophyta;Chrysophyceae;Chrysophyceae_X;Chrysophyceae_Clade-F;Chrysophyceae_Clade-F_X;Chrysophyceae_Clade-F_X_sp.;	0.996474	0	0	0	0	0	0	0	0	0	0	0	0	0	0	0	0	0	0	0	0	0	0	0	0	0	0	0	0	0	0	0	0	0	0	0	0	0	0	0	0	0	0	9	0	0	0
1be043b8bc2b7be584b87b46c008e034	AGCTCCAATAGCGAATACTAATTCTGCTGCAGTTAAAAAGCTCGTAGTTGAACTTCTGGTAGGGCGGATCCGGTCGTTGGACGAATGTCCTCTGTTACTGTGTGTCTCGTCTGGCCATCCTCGGCAACATTTTGTTGTTGTCGTCTTTCACTGTAAAAAAATTAGGGTGTTTCAAGCAAAAGTTATTTGGAATATATTAGTATGGGATGATAAGATAGGCTCTGGATGCTATTTTGTTGGTTTGCACATTTAGAGAATGATTAACAGGGACAGTTGGGGGTATTCATATTTACATGTCAGAGGTGAAATTCTTGGATTTTGGAAAGATGAACTACTGCGAAGGCATTTACCAAGGATGTTT	Eukaryota;Stramenopiles;Sagenista;Labyrinthulomycetes;Thraustochytriales;Thraustochytriaceae;Thraustochytriaceae_X;Thraustochytriaceae_X_sp.;	0.99662	0	0	0	0	0	0	0	0	0	0	6	244	0	0	0	0	0	0	0	0	258	0	0	0	0	0	0	0	0	0	0	0	0	0	0	0	0	0	0	0	0	0	0	0	0	0
1bebd1e11d7e3b6848705d2df304fdc7	AGCTCCAATAGCGTATATTAAAGTTGTTGCAATTAAAAAGCTCGTAGTTGAATTTCTGGGCGGGCGCAGCGGTCGTGTGGTCGCAAGGCTGCAGTGTTACTTGTTTGCGTGTTCCGTCTTGTTAGCTTTTGCAGGGTGCGTGTACGGAGGTGTCTTAGTTGGCACGTGCCGGGGCGTGACTTACTCCCTGCATCGATTACTGTGAACAAATTAGAGTGTTTAAAGCAGGCTTGTTAGCTTGAATACATTAGCATGGAATAATGATATAGGACTTTGGTGCTATTTCGTTGGTTGTGTACCAAGGTAATGATTAATAGGGATAGTTGGGGGTATTCATATTTGATTGTCAGAGGTGAAATTCTTGGATTTATTAAAGATGAACAACTGCGAAAGCATTTA…	Eukaryota;Stramenopiles;Opalozoa;Bicoecea;Bicoecales;Bicoecaceae;Bicoecaceae_X;Bicoecaceae_X_sp.;	0.760605	0	0	0	0	0	0	0	0	0	0	0	0	0	0	0	0	0	0	0	0	0	0	0	0	0	0	0	0	0	0	0	0	0	0	0	0	0	0	0	0	0	0	0	2	0	0
1bf0f12de1cb1f5b38eb10536daa79aa	AGCTCCAATAGCGTATATTAAAGTTGTTGCAGTTAAAAAGCTCGTAGTTGAACCTTGGGCCTGGCTGGCCGGTCCGCCTCACCGCGTGCACTGGTTCGGCCGGGCCTTTCCCTCTGGGGAACCGCATGCCCTTCACTGGGTGTGTCGGGGAACCAGGACTTTTACTGTGAAAAAATTAGAGTGTTCAAAGCAGGCCTATGCTCGAATACATTAGCATGGAATAATAGAATAGGACGTGTGGTTCTATTTTGTTGGTTTCTAGGACCGCCGTAATGATTAATAGGGACAGTCGGGGGCGTCAGTATTCAATTGTCAGAGGTGAAATTCTTGGATTTATTGAAGACTAACTACTGCGAAAGCATTCGCCAAGGATGTTT	Eukaryota;Opisthokonta;Fungi;Ascomycota;Pezizomycotina;Sordariomycetes	0.999225	0	0	0	0	0	0	0	0	0	0	0	0	0	0	0	0	0	0	0	0	0	11	0	0	0	0	0	0	0	0	0	19	0	0	0	0	0	0	0	0	0	0	0	0	0	0
1bf93e2dea33ef2dd1274ea78ef94cee	AGCTCCAATAGCGTATACTAAAGTTGTTGCAGTTAAAAAGCTCGTAGTTGAATTTCTGGTCGTGGCGATCGGTCCGCCCCTCACGGGGTGTGCACCTGGTCTCTACGTCCATCCTCGGGGAGAGCGCGTCTGGCATTCAGTTGTCGGGCGCGGGATCCTCGTCATTTACTGTGAGCAAAATAGAGTGTTCAAAGCAGGCTTAGGCCGTTGAATACATTAGCATGGAATAATAAGATAGGACCTTGGTCTATTTTGTTGGTTTGCATTCCAAGGTAATGATTAATAGGGATAGTTGGGGGTATTCGTATTCAATTGTCAGAGGTGAAATTCTTGGATTTATGGAAGACGAACTACTGCGAAAGCATTTACCAAGGATGTTT	Eukaryota;Stramenopiles;Ochrophyta;Chrysophyceae;Chrysophyceae_X;Chrysophyceae_Clade-F;Paraphysomonas;Paraphysomonas_imperforata;	0.816316	0	0	0	0	0	0	0	0	0	0	0	0	0	0	0	0	0	0	0	0	0	0	0	0	0	0	0	0	0	0	0	0	0	0	0	0	0	0	0	0	0	0	0	0	0	0
1c133cea5c82ae0c99910302e35390f6	AGCTCCAATAGCGTATACTAAAGTTGCTGCAGTTAAAAAGCTCGTAGTTGGATTTCGGTTAACGAACAATTAGTCTACACAACATGTGTACGAACTGGTTGATCGTTTCCTTCTTTTCAGATACACCTTTTTTGGGTGTTCTGAATCTTTTACTTTGAGAAAATTAGAGTGTTCAAAGCAGGCGTAACCAAGCCTTTGAATATATTAGCATGGGATAATGGAATAAGACTTTTTGGCTTATTTTCGTTGGTTCTTTAGGCCTTAAGTAATGATTAATAGGGATAGTTGGGGTCATTAGTATTTAATAGTCAGAGGTGAAATTCTAAGATTTATTAAAGACTAACTACTGCGAAAGCATTTGACAAGGATGTTT	Eukaryota;Amoebozoa;Lobosa;Tubulinea;Leptomyxida;Flabellulidae;Flabellula;Flabellula_sp.;	0.999962	0	0	0	0	0	0	0	0	0	0	0	0	0	0	0	0	0	0	0	0	0	476	0	0	0	0	0	0	0	23	0	0	0	0	0	0	0	0	0	0	0	0	0	0	0	0
1ca4f2928959aac52f190374459a2d57	AGCTCCAATAGCGTATATTAAAGTTGTTGAGGTTAAAAAGCTCGTAGTTGAACCTTGGGCCTAGCCGACCGGTCCGCCTCACCGCGTGCACTGGTTCGGTTGGGTCTTTCCTTCTGGAGAACCTCATGCCCTTTACTGGGTGTGTTGGGGAACCAGAACTTTTACTCTGAACAAATTAGATCGCTTAAAGAAGGCCTATGCTCGAATACATTAGCATGGAATAATAGAATAGGACGTGTGGTTCTATTTTGTTGGTTTCTAGGACCGCCGTAATGATTAATAGGGACAGTCGGGGGCATCAGTATTCAATTGTCAGAGGTGAAATTCTTGGATTTATTGAAGACTAACTACTGCGAAAGCATTTGCCAAGGATGTTT	Eukaryota;Opisthokonta;Fungi;Ascomycota;Pezizomycotina;Sordariomycetes	0.999907	0	0	0	0	0	0	0	0	0	0	0	0	0	0	0	0	0	0	0	0	0	0	0	0	0	0	0	0	0	2	0	12	0	0	0	0	0	0	0	0	0	0	0	0	0	0
1ce773d4109ed3a671bf19b7c6bed3e2	AGCTCCAATAGCGTATATTAAAGTTGTTGCAGTTAAAAAGCTCGTAGTTGGATTTTGGAATAAGCTAGTTGGTCCACCGTAAGGTGAGAACTGATGGGCATATTCTTCCTCTCGAAAACGGTGCGTGCAGTTCATTCTGTGTGTATCGGGTTCGGGACTTTTACTGTGAAAAAATTAGAGTGTTCAAAGCAGGCTATCGCTTGAATATTTCAGCATGGAATAATAGAATAGGACATTGGTTCTATTTTGTTGGTTTCTGGAACCGAAGTAATGATTAATAGGGATAGTTGGGGGCATTAGTATTTAATTGTCAGAGGTGAAATTCTTGGATTTATGAAAGACTAACTTCTGCGAAAGCATTTGCCAAGGATGTTT	Eukaryota;Opisthokonta;Mesomycetozoa;Ichthyosporea;Rhynosporida;Rhynosporidae;Rhynosporidae_X;Rhynosporidae_X_sp.;	0.999996	0	0	0	0	0	0	0	0	0	0	0	0	0	0	0	0	0	0	0	0	58	0	0	0	0	0	0	0	0	0	0	0	16	0	0	12	0	0	0	0	0	0	0	24	0	0
1d6057800a80fe267d875c4597cfecb3	AGCTCCAATAGCGTATATTAAAGTTGTTGCAGTTAAAAAGCTCGTAGTTGGATTTGTGGCGTACGGTGGGTTCCGGGCACTTGTTGTCCGTGCAATTCGCCGTTGCCATCCTTGGGTGGAACCAGTGTGGCATTAGGTTGTCGTGCTGGGGATGCCCATCATTTACTGTGAAAAAATTAGAGTGTTCAAAGCAGGCTTATGCCGTTGAATATATTAGCATGGAATAATGAGATAGGACTTTTTTGCTATTTTGTTGGTTTGCGCAAAGAGGTAATGATTAATAGGGACAGTTGGGGGTATTCGTATTCCATTGTCAGAGGTGAAATTCTTGGATTTTTGGAAGACGAACTACTGCGAAAGCATTTACCAAGGATGTTT	Eukaryota;Stramenopiles;Ochrophyta;Bacillariophyta;Bacillariophyta_X;Raphid-pennate;Navicula	0.985461	8	10	0	0	0	0	8	0	0	0	0	0	0	0	0	0	0	0	6	0	0	0	0	0	0	0	0	8	0	0	0	0	0	0	0	0	0	0	0	0	0	0	0	0	0	0
1d85c39b9c9757e9fb553871d7c9c955	AGCTCCAATAGCGTATATTAAAGTTGTTGCAGTTAAAAAGCTCGTAGTTGAACTTCTGTACATTCCCAGTTCTGGCTTCGGTCAAGCTGTGGAGTGTGCATCCGCTTGCAAACTTAGACCGGCCTTCACTGGTCGACTAAGGGAGTAAGCCCTTTACTTTGAAAAAATTAGAGTGTTTCAGGCAGGCTTTGGCTCGAATACATTAGCATGGAATAATGGAATAGGACTTTTGTCCATTTGGTTGGTTATTGGACATAAGTAATGATTAAAAGGGACAGTTGGGGGCATTAGTATTTAATTGTCAGAGGTGAAATTCTTGGATTTATTAAAGACTAACTTATGCGAAAGCATTTGCCAAGGATGTTT	Eukaryota;Alveolata;Ciliophora;Oligohymenophorea;Scuticociliatia_1;Philasterida;Philaster;Philaster_apodigitiformis;	0.994236	0	0	0	0	0	0	0	0	0	0	0	0	0	0	0	0	0	0	0	0	0	0	0	0	0	0	0	0	0	0	0	0	0	0	0	0	0	0	0	0	0	0	0	0	0	14
1d8e6fe213d5ee687d6593912ca0dfaf	AGCTCCAATAGCGTATATTAAAGTTGTTGCAGTTAAAAAGCTCGTAGTTGGATTTGTGGCTGTCGTGGGCGGCCTAGCACTCAGTGCCAGCGCTCTGCCCGCGTCGCCATCCTTGGGTGGAACCTGTGTGGCATTAGGTTGTCGTGCAGGGGATGCCCATCTTTTACTGTGAAAAAATTAGAGTGTTCAAAGCAGGCTTATGCCGTTGAATATATTAGCATGGAATAATGAGATAGGACCTTGGTACTATTTTGTTGGTTTGCGCACCGAGGTAATGATTAATAGGGACAGTTGGGGGTATTCGTATTCCATTGTCAGAGGTGAAATTCTTGGATTTTTGGAAGACGAACTACTGCGAAAGCATTTACCAAGGATGTTT	Eukaryota;Stramenopiles;Ochrophyta;Bacillariophyta;Bacillariophyta_X;Raphid-pennate;Achnanthes;Achnanthes_sp.;	0.752248	5	9	74	11	12	13	0	0	0	0	0	0	0	0	0	0	0	0	0	8	0	0	0	0	0	0	0	0	0	0	0	0	0	0	0	0	0	0	0	0	0	0	0	0	0	0
1dad97e1a14372e9ec2626465f33c88c	AGCTCCAATAGCGTATACTAATGTTGTTGCAGTTAAAAAGCTCGTAGTTGAACCTCTGGTAGGAGTAACCCGGCCTTTGGGCTCATGCCCTCTGTTTGCTGTGTGTTATCTCTGGCCATCTTCGCTGTTCTTTGGACAGCGTCTTTCACTGTAAAAAAATTAGGGTGTTTCAAGCAAAAGTTTCTTTGGAATATATTAGTATGGGATGATAAGATAAGCTCTCGATGCTATTTTGTTGGTTTGCACATCAAGAGAATGATTAACAGGGACAGTTGGGGGTATTCGTATTTACATGTCAGAGGTGAAATTCTTGGATTTTGGAAAGACGAACTACTGCGAAAGCATTTACCAAGGATGTTT	Eukaryota;Stramenopiles;Sagenista;Labyrinthulomycetes;Thraustochytriales;Thraustochytriaceae;Thraustochytriaceae_X;Thraustochytriaceae_X_sp.;	0.999414	2	0	0	0	0	0	0	0	0	0	40	449	0	0	0	0	0	0	49	0	0	0	0	0	0	0	0	0	0	0	0	0	0	0	0	0	0	0	0	0	0	0	8	0	0	23
1dbcf3663a05a8ee5a7f9b3732a7c843	AGCTCCAATAGCGTATATTAAATTTGTTGCAGTTAAAAAGCTCGTAGTTGAAATCCTGGTTAGAACTTGTGATGTTGCACTTGGTGCAGTAATCATTTTTCATTTAACCATCTTTGGGGGATATGTAGCTGGCATTAAGTTGTTGGTTGTAGACATCCCATCCTTTACTGTGAAGAAAATAGAGTGCTCAAAGCAGGCTTATGCCAATGAATACATTAGCATGGAATAATAAGATAAGATAGTGATGTTACTTTGTTGGTTTATGTGTCATTATAATGTTTAAGAGGGACTGTTGGGGGTATTTGTATTCCACTGTCAGAGGTGAAATTCTTGGATTTTTGGAAGACACACAACTGCGAAAGCATTTACCAAGGATGTTT	Eukaryota;Stramenopiles;Ochrophyta;Bacillariophyta;Bacillariophyta_X	0.868527	0	0	0	0	0	0	0	0	0	0	0	0	0	0	0	0	0	0	0	0	0	0	0	0	0	0	0	0	0	0	0	9	0	0	0	0	0	0	0	0	0	0	0	0	0	0
1dc5aa1c4c9a3733726b88808d6e17b6	AGCTCCAATAGCGTATATTAAAGTTGTTGCAGTTAAAAAGCTCGTAGTTGAATTTCTGGCCGGCGCTGTTCACGGCTCTCGCAGTCGGTTCAGGAGCCTGGTCATCCGTATGGGAAGCTAGCTCGTCCTTCAGTGGTCGGCTAGTGGATCATACACTTTACTTTGAAAAAATTAGAGTGTTTCAGGCAGGCAATTGCTTGGATACTGCAGCATGGAATAATGGAATAGGACTTTGACCTATTTGTTGGTTTCTTGAGGTCAAAGTAATGATTAATAGGGACAGTTGGGGGCATCCGTATTTAATTGTCAGAGGTGAAATTCTTGGATTTATTAAAGACGAACTTATGCGAAAGCATTTGCCAAGGATGTTT	Eukaryota;Alveolata;Ciliophora;Colpodea;Colpodea_X;Colpodida;Colpoda;Colpoda_steinii;	0.992785	0	0	0	0	0	0	0	0	4	0	186	68	0	0	0	0	0	0	0	4	0	0	0	0	0	0	0	0	0	898	0	0	0	0	0	0	43	0	0	0	0	0	0	0	0	0
1de7d6a5f2b7c78c0ee8cc46db51997d	AGCTCCAATAGCGTATACTAAAGTTGTTGCAGTTAAAAAGCTCGTAGTTGAATTTCTGGTCGTGGCAGTCGGTCCGCCCCTCACGGGGTGTGCACCTGGCTTCTGCAGCCATCCTCGCGGAGAGCGCGTCTGTCGTTTACTCGTCGGGCGCGGGATCCGCGTCATTTACTGTGAGCAAAATAGAGTGTTCAAAGCAGGCTTAGGCCGTTGAATACATTAGCATGGAATAATAAGATAGGACCTTGGTCTATTTTGTTGGTTTGTACGCCAAGGTAATGATTAATAGGGATAGTTGGGGGTATTCGTATTCAATTGTCAGAGGTGAAATTCTTGGATTTATGGAAGACGAACTACTGCGAAAGCATTTACCAAGGATGTTT	Eukaryota;Stramenopiles;Ochrophyta;Chrysophyceae;Chrysophyceae_X;Chrysophyceae_Clade-F;Clathromonas;Clathromonas_butcheri;	0.962317	0	0	0	0	0	0	0	0	0	0	0	0	0	0	0	0	0	0	0	0	0	0	0	0	0	0	385	0	0	0	0	0	0	0	0	0	0	0	0	0	0	0	0	0	0	0
1e05ed33f06fdceab0d2654151d9f719	AGCTCCAATAGCATATATTAAAGTTGTTGCAGTTAAAAAGCTCGTAGTTGGATTTCTGGGAGGGAACTAATGTCCGCTTGTTGGCGTGTGCAGCAGTTCCCTCCCATCCTTCTGTAAACGTTTCTTGGTATTCATTTACTGGTTTCGGGCTCAGATATTTTACCTTGAGAAAATTAGAGTGTTTCAGGCAGGCTCGCGCCGGAATACATTAGCATGGAATAATAGAATAGGACATTTGACTCCTTTGTTGGTTTGAGGGTCGGATGTAATGATTAATAGGGATAGTTGGGGGCATTAGTATTTCATTGTCAGAGGTGAAATTCTCGGATTTGTGAAAGACTAACTAATGCGAAAGCATTTGCCAAGGATGTTT	Eukaryota;Alveolata;Ciliophora;Spirotrichea;Hypotrichia	0.997744	0	0	0	0	0	0	0	0	0	0	0	0	0	0	0	0	0	0	0	0	0	0	0	0	0	0	0	0	0	0	0	0	0	0	0	0	0	0	0	0	0	0	0	0	0	0
1e4e3aa3f296500e426a296f4abb9c19	AGCTCCAATAGCGTATATTTAAGTTGTTGCAGTTAAAAAGCTCGTAGTTGGATTTCGGATGGGATTTGCCGGTCCGTCGTTGCGATGTGCACTGGCAAGTCCTATCTTGTTGTCGGGGACTAGCTCCTGGGCTTCACTGTCCGGGACTAGGAGCCGGCGAAGTTACTTTGAGTAAATTAGAGTGTTCAAAGCAAGCCTACGCTCTGAATATATTAGCATGGAATAACACGATAGGACTCTGGCTTATCTTGTTGGTCTGTGAGACCAGAGTAATGATTAAGAGGGACAGTCGGGGACATTCGTATTTCAATGTCAGAGGTGAAATTCTTGGATTTTTGAAAGACGAACTTCTGCGAAAGCATTTGTCAAGGATGTTT	Eukaryota;Archaeplastida;Chlorophyta;Chlorodendrophyceae;Chlorodendrales;Chlorodendraceae;Chlorodendrales_XX;Chlorodendrales_XX_sp.;	0.999651	0	0	0	0	0	0	0	0	0	0	0	0	0	0	0	0	0	0	0	0	0	0	0	0	0	0	0	0	0	0	0	17	0	0	0	0	0	0	0	0	0	0	0	0	0	0
1e708e3be9e0593a900ebb1289fea7fb	AGCTCCAATAGCGTATATTAAAGTTGTTGCAGTTAAAAAGCTCGTAGTTGAATTTCTGGGCTGGCCGGGAGGCGGCCTTCGGTCGACCTCCCCGCGAGTTCATCCTCGCCCCTCGGGGCGTCATTTACTGTGAAAAAATTAGAGTGTTTAAAGCAGGCTTCTGGCTTGAATACATTAGCATGGAATAATGAGATAGGACCGAGTCGTATTTTGTTGGTTGCGCGAACCGGTAATGATTAATAGGGACAGTTGGGGGTATTCATATTTAATTGTCAGAGGTGAAATTCTTAGATTTGTTAAAGATGAACTACTGCGAAAGCATTTACCAAGGATGTTT	Eukaryota;Stramenopiles;Opalozoa;Bicoecea;Anoecales;Cafeteriaceae;Pseudobodo;Pseudobodo_tremulans;	0.703199	0	0	0	0	0	0	0	0	0	0	0	0	0	0	0	0	0	0	0	0	0	0	0	0	0	27	0	0	4	0	0	0	0	0	0	0	0	0	0	0	0	0	0	0	0	0
1e82d3bdfa4407f88832ec5201eec0bb	AGCTCCAATAGCGTATATTAAAGTTGTTGCAGTTAAAAAGCTCGTAGTTGAACTTCTGTACAGTCTCATTTCTGGCTTAGGTCAAGATGTTGGCTGTGCATCCGCTTGCAAAGCTGGTTCGGCCTTAACTGGTCGGCTAGTAGAGTAAGCCCTTTACTTTGAAAAAATTAGAGTGTTTCAGGCAGGCAATGGCTCGAATACATTAGCATGGAATAATGGAATAGGACTTTTGTCCATTTGGTTGGTTATTGGACATGAGTAATGATTAAAAGGGACAGTTGGGGGCATTGGTATTTAACAGTCAGAGGTGAAATTCTTGGATTTGTTAAAGACTAACTTATGCGAAAGCATTTGCCAAGGATGTTT	Eukaryota;Alveolata;Ciliophora;Oligohymenophorea;Scuticociliatia_1;Philasterida;Uronema;Uronema_marinum;	0.999963	0	0	0	0	0	0	0	0	12	0	76	9	10	0	24	0	15	24	0	0	0	0	0	0	0	0	0	0	0	0	0	0	0	0	0	0	0	0	0	0	0	0	0	0	0	0
1e8728df0c80c946b82eb6752ae74793	AGCTCCAATAGCGTATATTAAAGTTGTTGCAGTTAAAAAGCTCGTAGTTGGATTTGTGGGCGCCGCTGTGGTCTATTTGGTACTATCGGCGGTGCCCATCCTTGGGTGGAACCTGTGTGGCATTAGGTTGTCGCGGAGGGGATGCTCATCGTTTACTGTGAAAAAATTAGAGTGTTCAAAGCAGGCTTACGCCGTTGAATATATTAGCATGGAATAATGAGATAGGACGTCGGTACTATTTTGTTGGTTTGCGCACCGAGGTAATGATTAACAGGGACAGTTGGGGGTATTCGTATTCCATTGTCAGAGGTGAAATTCTTGGATTTCTGGAAGACGAACTACTGCGAAAGCATTTACCAAGGATGTTT	Eukaryota;Stramenopiles;Ochrophyta;Bacillariophyta;Bacillariophyta_X;Raphid-pennate	0.987456	0	0	0	0	0	0	0	0	0	0	0	0	0	0	0	0	0	0	0	0	0	0	0	0	0	0	0	0	0	0	0	0	0	0	0	0	0	0	0	0	0	0	0	0	0	0
1e92520e34cad63b228143271c66c2fe	AGCTCCAATAGCGTATATTAAAGTTGTTGCAGTTAAAAAGCTCGTAGTTGGATTTCTGGTAGGAGCGACCATACCGGGCTTGATTGTCCGTGTAATGCGTTGTCTCCAGCCATCCTCGTGGAGAGCGTTTCTGTCATTAATTTGTCGGATTCGGGACCCGCGTCATTTACTGTGAAAAAATTAGAGTGTTTAAAGCAGGCAATTGGCTTGAATACATTAGCATGGAATAATAAGATAGGACTTTGGTGCTATTTTGTTGGTTTGCACATCAAGGTAATGATTAACAGAATCAGTCGGGGATATTCGTATGCAAATGTCAGAGGTGAAATTCTTGGATTTTTTACAGACGAACTACTGCGAAAGCATTTATCAAGGATGTTT	Eukaryota;Stramenopiles;Sagenista;Labyrinthulomycetes;Labyrinthulales;Labyrinthulaceae;Labyrinthulaceae_X;Labyrinthulaceae_X_sp.;	0.999486	0	0	0	0	0	0	0	0	0	0	0	0	13	0	0	0	0	38	0	0	0	0	0	0	0	0	0	0	0	0	0	0	0	0	0	0	0	0	0	0	0	0	0	0	0	0
1e97f05c3b0e15d87a31ed75a873a030	AGCTCCAATAGCGTATATTAAAGTTGTTGCAGTTAAAAAGCTCGTAGTTGGATTTTGGACCTGGACGGGCGGTCCGCCTCACGGCGTGTACTGTCTGGCTGGGTCTTTCCTCTTGGTGATCTGTTGTTTCGGCAGCAGGGAACCAGGACCTTTACTTTGAAAAAATTAGAGTGTTCAAAGCAGGCTTTACGCCGGAATATATTAGCATGGAATAATAAAATAGGACGTGCGGTTCTATTTTGTTGGTTTTTGGAATCGCCGTAATGATTAATAGGGATAGTCGGGGGCATTAGTACTCACATGCTAGAGGTGAAATTCTTGGATTTTGTGAAGACTAACTACTGCGAAAGCATTTGCCAAGGATGTTT	Eukaryota;Opisthokonta;Fungi;Basidiomycota;Ustilaginomycotina;Exobasidiomycetes;Malassezia;Malassezia_sp.;	0.984655	0	0	0	0	0	0	0	0	0	0	0	0	0	0	0	0	0	0	0	0	0	0	18	0	0	0	0	0	0	0	0	0	0	0	0	0	0	0	0	0	0	0	0	0	0	0
1ef5b3f2cf49c59b6408f1e26c4dcb05	AGCTCCAATAGCGTATATTAAAGTTGTTGCAGTTAAAAAGCTCGTAGTTGAAATTTTGATTGTAGCGGTCAGTCTCACAACAGTGAGTGCTAGATGTGCTGTGGTCATGTTTCGTTGGAACGTGTGTGGCATTGAGTTGTCGTGCATGGGAAGACGATCGTTTACTGTGAAAAAATTAGAGTGTTCAAAGCAGGCTTATGCCGTTGAATATATTAGCATGGAATAATAAGATAGGACCAGGGTACTATTTTGTTGGTTTGTGCACCTTGGTAATGATTAATAGGGACAGTTGGGGATATTCGTATTGCGGTGTCAGAGGTGAAATTCTTGGATTTCCGCAAGACGAGCTACTGCGAAAGCATTTATCAAGGATGTTT	Eukaryota;Stramenopiles;Ochrophyta;Bacillariophyta;Bacillariophyta_X;Araphid-pennate;Striatella;Striatella_unipunctata;	1	0	0	0	0	0	0	0	0	0	0	0	0	0	0	0	0	0	0	0	0	0	0	0	0	0	0	0	0	0	0	0	0	0	0	0	0	0	0	0	0	0	0	0	0	0	0
1f05b9ee58ea72806e05bb1a17c960a5	AGCTCCAGAAGCGTATGCTAACGTTGTTGCAGTTAAAAAGCTCGTAGTTGAACGTCTGTCGGTTGGGTCTGTGGGGCGAATGCTCTGTAGATCGGCCTTTTTTCTTCTTGGCTCTCTCTTTGGGGGGGCCTCGTTCACTGTAAACAAATTGGAGTGCTCCACGCAGGTCGTTGGGACCTGGACAATTGTTATGGGATGATGAGATAGGGCTCGGGCACTATTTGGTCGGTTTGCATGCCTGGGTAATGGTGAATAGGAACAGTTGGGGATATTCGTATTTAGCGGTCAGAGGTGAAATTCTTGGATTCGGGAAAGACGAACAACTGCGAAGGCATTTATCAAAGATGTTT	Eukaryota;Stramenopiles;Sagenista;Labyrinthulomycetes;Thraustochytriales;Thraustochytriaceae;Thraustochytriaceae_X;Thraustochytriaceae_X_sp.;	0.973732	0	0	0	0	0	0	0	0	0	0	0	0	0	0	0	0	0	0	0	0	0	0	0	0	0	0	0	0	0	0	0	37	0	0	0	0	0	0	0	0	0	0	0	0	0	0
1f30a1a1afae30ab6367f2fdd7416378	AGCTCCAATAGCGTATATTTAAGTTGTTGCAGTTAAAAAGCTCGTAGTTGGATTTCGGATGGGATTTGCCGGTCCGTCGTTGCGATGTGCACTGGCCAATCCTATCTTGTTGTCGGGGACTAGCTCCTGGGCTTCACTGTCCGGGACTAGGAGCTGACGAGGTTACTTTGAGTAAATTAGAGTGTTCAAAGCAAGCCTACGCTCTGAATACATTAGCATGGAATAACACGATAGGACTCTGGCTTATCTTGTTGGTCTGTGAGACCAGAGTAATGATTAAGAGGGACAGTCGGGGACATTCGTATTTCATTGTCAGAGGTGAAATTCTTGGATTTATGAAAGACGAACTTCTGCGAAAGCATTTGTCAAGGATGTTT	Eukaryota;Archaeplastida;Chlorophyta;Chlorodendrophyceae;Chlorodendrales;Chlorodendraceae;Chlorodendrales_XX;Chlorodendrales_XX_sp.;	0.71274	0	0	0	0	0	0	0	0	0	0	0	0	0	0	0	0	0	0	0	0	0	0	0	0	0	0	0	0	0	0	0	0	0	0	0	0	0	0	0	0	0	0	0	0	0	0
1f5e6ff9d37a0954f5584cb91cc31917	AGCTCCAATAGCGTATATTAAAGTTGTTGCAGTTAAAAAGCTCGTAGTTGAACTTCTGTACATTCCCGATTCTGGCTTCGGTCAAGTTGTGGAGTGTACATCCGCTTGCAAATCTAGTTCGGCATTCACTTGTTGGCTAGGGGAGTAAGCTTTTTACTTTGAAAAAATTAGAGTGTTTCAGGCAGGCAATTGTTTGTATACATTAGCATGGAATAATGGAATAGGACTTTTGTCCATTTGATTGGTTATTGGACATGAGTAATGATTAAAAGGGACAGCTGGGGGCATTAGTACTTAATTGTCAGAGGTGAAATTCTTGGATTTATTAAAGACTAACTTATGCGAAAGCATTTGCCAAGGATGTTTTCATTAATCAAGAACGAAAG	Eukaryota;Alveolata;Ciliophora;Oligohymenophorea;Scuticociliatia_1;Philasterida;Uronema;Uronema_nigricans;	0.999872	0	0	0	0	0	0	0	0	0	0	0	0	0	0	0	0	0	0	0	0	0	0	0	0	0	0	10	0	0	0	0	0	0	0	0	0	13	0	278	535	0	227	0	0	0	0
1f5e818d5109d9f03c71bab54262940c	AGCTCCACTAGCGTATACCAATTTTGCTGCAGTTGAAAAGCTCGTAGTCGGATTTGTGCGGTGAGTCGTCGGTTCCGAACAGTGTTCGGAAACCAGATGACCTCACTGCATCCTCGGGTGGAACCTGTGTGGCATTAAGTTATCGTGCAGGGGATGCCCGTCTTTTACTGTGAATAAATTAGAGTGTTCAAAGCAGGCTTACGCCGTTGAATATGCTAGCATGGAATAATGAGATAGGACTTCGGTACTATTTTGTTGGTTTGCGCACCGAAGTAATGATTAATAGGGACAGTTGGGGGCATTCGTATTCCATTGTCAGAGGTGAAATTCTTGGATTTTTGGAAGACGAACTACTGCGAAAGCATTTGCCAAGGATGTTT	Eukaryota;Stramenopiles;Ochrophyta;Bacillariophyta;Bacillariophyta_X;Araphid-pennate;Hyalosira;Hyalosira_delicatula;	0.994473	0	0	8	0	0	0	0	0	0	0	0	0	0	0	0	0	0	0	0	0	0	0	0	0	0	0	0	0	0	0	0	0	0	0	0	0	0	0	0	0	0	0	0	0	0	0
1fa52011e4aab35bc10b85beabb24648	AGCTCCAATAGCGTATATTAAAGTTGTTGCAGTTAAAAAGCTCGTAGTTGGATTTGTGGTGTGTGGTGGGTTCCGGGCACTTGTTGCCTGAGTAACTTGCCGCTGCCATCCTTGGGTGGAACCTGTGTGGCATTAGGTTGTCGTGCAGGGGATGCCCATCGTTTACTGTGAAAAAATTAGAGTGTTCAAAGCAGGCTTATGCCGTTGAATATATTAGCATGGAATAATGAGATAGGACTTTTTCGCTATTTTGTTGGTTTGCGCGAGAAGGTAATGATTAATAGGGACAGTTGGGGGTATTCGTATTCCATTGTCAGAGGTGAAATTCTTGGATTTTTGGAAGACGAACTACTGCGAAAGCATTTACCAAGGATGTTT	Eukaryota;Stramenopiles;Ochrophyta;Bacillariophyta;Bacillariophyta_X;Raphid-pennate;Navicula	0.992121	0	0	0	0	0	0	0	0	0	0	0	0	0	0	0	0	0	0	0	0	0	0	0	0	0	0	0	0	0	0	0	0	0	0	0	0	0	0	0	0	0	0	0	0	0	0
1facf4cd76fe1225919317f84ffa1cce	AGCTCCAATAGCGTATATTAAAGTTGTTGCAGTTAAAAAGCTCGTAGTTGGATTTCTGGCAGGGCGCCGAGCACCACTGCTGTGTGTGCGAGGACCCGGCCATCCTTCTGTCAACTTTCGGTTGTGATTCATTTCACGCCAGAGCGATCAGATAATTTACCTTGAGAAAATTAGAGTGTTTCAGGCAGGCTTAGCCGGAATACATTAGCATGGAATAATTGAATAGGACTACTGTCCCGTTGTTGGTTACGTGGATAGGAGTAATGATTAATAGGGATAGTTGGGGGCATTAGTATTTATTAGCTAGAGGTGGAATTCTCTAATTTGATAAAGACTAACTTATGCGAAAGCATTTGCCAAGGATGTTT	Eukaryota;Alveolata;Ciliophora;Spirotrichea;Strombidiida	0.999663	0	0	0	0	0	0	0	0	0	0	0	0	0	0	0	0	0	0	0	0	0	0	0	0	0	0	0	0	0	0	0	0	0	0	0	0	0	0	0	0	0	0	0	0	0	0
1fe1a4200942e34be6e76cf62b5954c3	AGCTCCAATAGCGTATATTAAAGTTGTTGCAGTTAAAAAGCTCGTAGTTGAATTTCTGTATAATCTCGGTTTCGGCTCCTGTCGAACCGTAGATTGTACATCCGCTTACAAACTTAGCCCGGTCTTCATTGGTCGACTAAGGGAGTAGGCCCTTTACTTTGAAAAAATTAGAGTGTTTCAAGCAGGCATTGGCTCGAATACATTAGCATGGAATAATGGAATAGGACTAGTGTCCATTTGGTTGGTTATTGGACGTTAGTAATGATTAACAGGGACAGTTGGGGGCATTAGTACTTAACAGTCAGAGGTGAAATTCTTGGATTTGTTAAAGACTAACTTATGCGAAAGCATTTGCCAAGGATGTTT	Eukaryota;Alveolata;Ciliophora;Oligohymenophorea;Scuticociliatia_1;Philasterida;Paranophrys;Paranophrys_magna;	0.999965	0	0	0	0	0	0	0	0	0	0	0	0	0	0	0	0	0	0	0	0	0	0	0	0	0	0	0	0	0	0	0	0	0	0	0	0	0	0	0	0	0	0	0	0	0	0
1fe396be51c3e31bd911369dd72dfff6	AGCTCCAATAGCGTATATTAAAGTTGTTGCAGTTAAAAAGCTCGTAGTTGGATTTCTGACAGGAGCGACCATGCCGGGCTTGATTGTCCGTGTTTTGTGTTGTCTCCAGTCATCCTCGTGGAGAGCGTTTCTGGCATTAGTTTGTCGGTTTCGGGACCCGCGTCATTTACTGTGAAAAAATTAGAGTGTTTAAAGCAGGCAATTGGCTTGAATACATTAGCATGGAATAATAAGATAGGACTTTGGTGCTATTTTGTTGGTTTGCACATCAAGGTAATGATCAACAGAATCAGTCGGGGATATTCGTATGCAAATGTCAGAGGTGAAATTCTTGGATTTTTTACAGACGAACTACTGCGAAAGCATTTATCAAGGATGTTT	Eukaryota;Stramenopiles;Sagenista;Labyrinthulomycetes;Labyrinthulales;Labyrinthulaceae;Labyrinthulaceae_X;Labyrinthulaceae_X_sp.;	0.998672	0	0	0	0	0	0	0	0	0	0	0	0	0	0	0	0	0	0	0	0	0	0	0	121	0	0	0	0	0	0	0	0	0	0	0	0	0	0	0	0	19	0	0	0	12	0
1fef2589eb8082c348f395b1107caa82	AGCTCCAATAGCGTATATTAAAGTTGTTGCAGTTAAAAAGCTCGTAGTTGGATTTCTGGAGGTGGAGGCTGGATGCCCCGTGTGGGTATTCCTACAACCACTTTCCATCCTTCTGTTAACGATTCTTGGCCTTTATTGGCTGGTTTCGAGCTCAGATACTTTACCTTGAGTAAATTAGAGTGTTTCAGGCAGGCTTGCGCCCGAATACATTAGCATGGAATAATAGAATAGGACTTCGTCTCATTTTGTTGGTTTTATGAACGGAGTAATGATTAATAGGGATAGTTGGGGGCATTAGTATTAAACTGTCAGAGGTGAAATTCTTTAATCAGTTTAAGACTAACTTATGCGAAAGCATTTGCCAAGAATGTTTTCATCGATCAAGAACGAAA	Eukaryota;Alveolata;Ciliophora;Spirotrichea;Euplotia;Aspidiscidae;Aspidisca;Aspidisca_steini;	1	0	0	0	0	0	0	0	0	0	0	0	0	0	0	0	0	0	0	0	0	25	0	0	0	0	0	0	0	0	0	0	0	0	0	0	0	0	0	0	0	0	0	0	0	0	0
1ff0c29ef218e2a23b8be4a7f665b263	AGCTCCAATAGCGTATATTAAAGTTGTTGCAGTTAAAAAGCTCGTAGTTGGATTTGTGGTGCTGGCTGCGTTCCGTGCAATTGCGCGTGATCTTCGGCCGGCGCCATCCTTGGGTGGAATCTGTGTGGCATTAGGTTGTCGTGCAGGGGATGCCCATCGTTTACTGTGAAAAAATTAGAGTGTTCAAAGCAGGCTTATGCCGTTGAATATATTAGCATGGAATAATAAGATAGGACTTTGGAACTATTTTGTTGGTTTGCGCTCCGAAGTAATGATTAATAGGGACAGTTGGGGATCTTCGTATTCCATTGTCAGAGGTGAAATTCTTGGATTTCTGGAAGACGAACTACTGCGAAAGCATTGATCAAGGATGTTT	Eukaryota;Stramenopiles;Ochrophyta;Bacillariophyta;Bacillariophyta_X;Raphid-pennate	0.866512	0	0	0	0	0	0	0	0	0	0	0	0	0	0	0	0	0	0	0	0	0	0	0	0	0	0	0	0	69	0	0	0	0	0	0	0	0	0	0	0	0	0	0	0	0	0
20421c6220abdd9952d155326136fb2a	AGCTCCAATAGCGTATATTAAAGTTGTTGCAATTAAAAAGCTCGTAGTTGAATTTCTGGGCGGGCGCAGCGGTCGTGTGGTCGCAAGGCTGCAGTGTTACTTGTTCTGCGTGTTCCGTTCTGTTACTTTTTGCAGGGTGCATGAGTGTGCGGGTCTTAGTTGGTCCGCGTCTTGTGTGTCTTACTCCCTGCATCGATTACTGTGAACAAATTAGAGTGTTCAAAGCGGGCGGTTTGCTGCTTGAATACATTAGCATGGAATAATGACATAGGACTTTGGTGCTATTTCGTTGGTTGTGTACCAAGGTAATGATTAAAAGGGATAGTTGGGGGTATTCATATTTGATTGTCAGAGGTGAAATTCTTGGATTTATTAAAGATGAACAAGTGCGGAAGCATT…	Eukaryota;Stramenopiles;Opalozoa;Bicoecea;Bicoecales;Bicoecaceae;Bicoecaceae_X;Bicoecaceae_X_sp.;	0.999672	0	0	0	0	0	0	0	0	0	0	0	0	0	0	0	0	0	0	0	0	0	0	0	0	0	0	0	2	0	0	0	0	0	0	0	0	0	0	0	0	0	0	0	0	0	0
206cf6d6a8e158ede4c15ecba49674da	AGCTCCAAGAGCGTATATTAAAGTTGTTGCAGTTAAAAAGCTCGTAGTTGAATTTTGGGGCGGCCGCGGAGGTCCACTTTTTTGTGAGTACTTCTTGCGGCGGCCCTTCCATGGCCTTTTACCCAAAAGGCCATAGTTACTTTGAGTAAATGAGAGTGTTCAAAGCAGGCAAGCGCTTGAATCTTTTAGCATGGAATAATAAAATAGGACGATGATTCTATTTTGTTGGTTTCTAGGACCATCGTAATGATTAATAGGGACGGTCGGGGGCATTAGTATTCAGTTGTAAGAGGTGAAATTCTTAGATTTTCTGAAGACTAACTACTGCGAAAGCATTTGTCAAGGACGTTT	Eukaryota;Opisthokonta;Fungi;Ascomycota;Saccharomycotina;Saccharomycetales;Candida	0.992496	0	0	0	0	0	0	0	0	0	0	0	0	0	0	0	0	0	0	0	0	0	0	0	0	0	0	0	0	0	31	0	0	0	0	0	0	0	0	0	0	0	0	0	0	0	0
20a70fdbd5f8bd6ef84f0969d794cecc	AGCTCCAATAGCGTATATTAAAGTTGTTGCAGTTAAAAAGCTCGTAGTTGGATTTCTGACAGGAGCGACCATGCCGGGCTTGATTGTCCGTGTTTTGTGTTGTCTCCAGTCATCCTCGTGGAGAGCGTTTCTGGCATTAGTTTGTTGGGGACGGGACCCGCGTCATTTACTGTGAAAAAATTAGAGTGTTTAAAGCAGGCAATTGGCTTGAATACATTAGCATGGAATAATAAGATAGGACTTTGGTGCTATTTTGTTGGTTTGCACATCAAGGTAATGATCAACAGAATCAGTCGGGGATATTCGTATGCAAATGTCAGAGGTGAAATTCTTGGATTTTTTACAGACGAACTACTGCGAAAGCATTTATCAAGGATGTTT	Eukaryota;Stramenopiles;Sagenista;Labyrinthulomycetes;Labyrinthulales;Labyrinthulaceae;Labyrinthulaceae_X;Labyrinthulaceae_X_sp.;	0.999366	0	0	0	0	0	0	0	0	0	0	0	0	0	0	0	0	0	0	0	0	0	0	0	0	0	37	0	0	0	0	0	0	0	26	0	0	0	0	0	0	0	0	0	0	63	0
20aec276f1b94dd7e1993758e45acabf	AGCTCCAATAGTGTATCTTAATGTTGTTGCAGTTAAAAAGCTCGTAGTTGAATTTCTGGCACTCTGGCAAAGCTACGGCGATGCATGGGGTTGTCATCCGCGTTGGAACCGTGTGCGCAGCAATGCTATGCGGGGAAGGCGCATTTTACTTTGAAGAAATTAGAGTGTTCCAGGCAGGCTATGCTTGAATATCACAGCATGGAATAATGGAATAGGACTTGTCCTTTTCGTTGGTTAATTGGACTAGTAATGATTAACAGGGACAGTTGGGGGCATTCGTATTGGGCAGTCAGAGGTGAAATTCTTTAATTTGCTCAAGACGCACTAATGCGAAAGCATTTGCCAAGGATGTTT	Eukaryota;Alveolata;Ciliophora;Phyllopharyngea;Cyrtophoria_7;Hartmannulidae;Hartmannulidae_X;Hartmannulidae_X_sp.;	0.985242	0	0	0	0	0	0	0	0	6	0	259	1302	0	0	7	0	0	0	0	0	0	0	0	0	0	0	0	0	0	0	0	0	0	0	0	0	0	0	0	0	0	0	0	0	5	0
20b652be4cc9c1e2a78ff7d6dfd9434c	AGCTCCAATAGCGTATATTAATGTTGTTGCAGTTAAAAAGCTCGTAGTTGGACCTGTGGTGGGAATGGTCTGTCCGCACTCTGTGTGGTACGTGACCATTCCGGCCATCCTCGGGAGGAAGTGTCTGGCATTAGGTTGTCGGGCGGGGACTCTCGTCTTTTACTGTGAATAAATTAGAGTGTTCAAAGCAGGCTTATGCCGTGAATACATTAGCATGGAATAATGATATAGGACCTCAGTACTATTTCGTTGGTTTGTGCACTGAGGTAATGATTAATAGGGACAGTTGGGGGTATTCGTATTCCATTGTCAGAGGTGAAATTCTTGGATTTTTGGAAGACGAACTACTGCGAAAGCATTTACCAAGGATGTTT	Eukaryota;Stramenopiles;Ochrophyta;Bacillariophyta;Bacillariophyta_X;Araphid-pennate;Synedra;Synedra_fulgens;	0.993926	0	0	0	0	0	0	0	0	0	0	0	0	0	0	0	0	0	0	0	0	0	0	0	0	0	0	0	0	0	0	0	0	0	0	0	0	0	0	0	0	0	0	0	0	0	0
20cc133a2a404ca9271377999becd436	AGCTCCAATAGCGTATATTAAAGTTGTTGCAGTTAAAACGCTCGTAGTTGAAATTTTGCTAGTGACAACGAGTAATCTCGCTTGAGTATGTACTTGTTTTTACTAGCATTATTCTGAATCATTTAACAAATTAAAAATGTTAAATGTTCGGGGCCGTTACTTTGAGAAAATTAGAGTGTTTCAAGCAGGCGCAATGCCTTGAATACTGCAGCATGGAATAACAAGTAAGGACTCAAGTTCTTCTTGTTGGTTTAAGAGCGTGAGTAATGATTAAGAGGAACAGTTGGGGGTATTCGTACTTGGTAGTCAGAGGTGAAATTCTTAGATTTACTAAAGACGAACTACTGCGAAGGCATCTACCATGGATGTTT	Eukaryota;Alveolata;Apicomplexa;Gregarinomorphea;Neogregarinorida;Actinocephalidae;Syncystis;Syncystis_mirabilis;	0.998315	0	0	0	0	0	0	0	0	0	0	0	0	0	0	0	0	0	0	0	0	0	0	0	0	0	0	7	0	0	0	0	0	0	0	0	0	0	0	0	0	0	0	0	0	0	0
20d7ff8e006697d11dfc167a3a3a3443	AGCTCCAATAGCGTATATTAAAGTTGTTGCAGTTAAAAAGCTCGTAGTTGGATTTGTGGTGTGTGGTGGGTTCCGGGCACTTGTTGCCTGAGTAACTTGCCGCTGCCATCCTTGGGTGGAACCTGTGTGGCATTAGGTTGTCGTGCAGGGGATGCCCATCGTTTACTGTGAAAAAATTAGAGTGTTCAAAGCAGGCTTATGCCGTTGAATATATTAGCATGGAATAATGAGATAGGACTTTGTTGCTATTTTGTTGGTTTGCGCAACGAGGTAATGATTAATAGGGACAGTTGGGGGTATTCGTATTCCATTGTCAGAGGTGAAATTCTTGGATTTCTGGAAGACGAACTACTGCGAAAGCATTTACCAAGGATGTTT	Eukaryota;Stramenopiles;Ochrophyta;Bacillariophyta;Bacillariophyta_X;Raphid-pennate;Navicula;Navicula_sp.;	0.98754	0	0	0	0	0	0	0	0	0	0	0	0	0	0	0	0	0	0	0	0	0	0	0	0	0	0	0	0	0	0	0	0	0	0	0	0	0	0	0	0	0	0	0	0	0	0
21246ae6653d132cc2f3489e437e5f1a	AGCTCTAATAGCGTATATTAAAGTTGTTGCAGTTAAAAAGCTCGTAGTCGGATGTCGGGCTCGGAGAGGCTGTCGGCCTACGGTCGGACGGCAACTCCGGGCCTTTCTGCCTGGGGATCCTACTCTACTTAATTGTAGGGTAGTGGGACGCAGGCCGTTTACTTTGAAAAAATTAGAGTGTTCAAAGCAGGCCTACGCTTGAATACATTAGCATGGAATAATGGAATAGGACTTTGGTCTTATTTGTTGGTTTATGGGACCGAAGTAATGATTAACAGGGACAGTTGGGGCCGTTTATATTTCGTTGTCAGAGGTGAAATTCTTGGATTTACGAAAGATAAACTTCTGCGAAAGCATTCGGCAAGGATGTTT	Eukaryota;Hacrobia;Cryptophyta;Cryptophyceae;Pyrenomonadales;Pyrenomonadaceae;Rhodomonas;Rhodomonas_sp.;	0.992441	0	0	0	0	0	0	0	0	0	0	0	0	0	0	0	0	0	0	0	0	0	0	0	0	0	0	0	0	0	0	0	0	0	0	0	0	0	0	0	0	0	0	0	0	0	0
212eede409ea97a40d23972282f173c8	AGCTCCAATAGCGTATATTAAAGTTGTTGCAGTTAAAAAGCTCGTAGTTGGATTTCTGGTAGGAGCGACCGTTCCGGACTTGATTGTTCGTGTATTGTGTTGTCTCCAGCCATCCTTGTGGAGAACTTTTCTTGCATTAATTTGTAGGGATTGAGACCCGCATCGTTTACTGTGAAAAAATTAGAGTGTTTAAAGCAGGCAATAGCTTGAATACATTAGCATGGAATAATAAGATAGGACTTTGGTACTATTTTGTTGGTTTGCATACCAAATTAATGATCAACAGGAACAGTTTGAGGATATTCGTATGAACATGTCAGAGGTGAAATTCTTGGATTTTGATCAGACGAACTACTGCGAAAGCATTTATCAAGGATGTTT	Eukaryota;Stramenopiles;Sagenista;Labyrinthulomycetes;Labyrinthulales;Labyrinthulaceae;Aplanochytrium;Aplanochytrium_stocchinoi;	0.964348	0	0	0	0	0	0	0	0	0	0	0	0	0	0	0	0	0	0	0	57	0	0	0	0	0	0	0	0	0	0	0	0	0	0	0	0	0	0	0	0	0	0	0	0	0	0
2141da8350803496f3d72be88815599e	AGCTCCAATAGCGTATATTAAAGTTGTTGCAGTTAAAAAGCTCGTAGTTGAAGCCAAGGAAAGCGGACGAAGGTCTTTACCGGTGTCCGTATTTCCACTTTTCGCAAAGACGCCTCTACATATTAATTTATGTGGTGGTTGAGTTGCGTCGTTTACTGTGAACAAATTAGGGTGTTTAAAGCAGGCCTACGTTTGAATACACTAGCATGGAATAATAAGATATGACCAAAGTAGTATTTTGTTGGTGACCACTATGGTAATGATTGAAAGAAACTGTTGTGGGTATTCGTATGAGCATGTCAGAGGTGAAATTCTTGGATTTTGATCAGACGAACTACTGCGAAAGCATTTACCAAGGATGTTT	Eukaryota;Stramenopiles;Sagenista;Labyrinthulomycetes;Labyrinthulales;Labyrinthulaceae;Labyrinthula;Labyrinthula_sp.;	0.977384	0	0	0	0	0	0	0	0	0	0	0	0	0	0	0	0	0	0	0	0	11	9	0	15	0	0	0	0	4260	23	215	115	0	11	0	0	10	0	11	11	0	0	0	0	0	8
2151c36e740b2a977ebaa2413d379ac6	AGCTCCAATAGCGTATATTAAAGTTGTTGCAGTTAAAAAGCTCGTAGTTGGATTTCTGAATGGATGCCGATGCCCGCCTGTTGGCGTGTGCAAAGGTGCCCGTTCATCCTTCTGTTAAGGTTTCTTAGTATTCATTTACTGGTTTCCGGCTCAGATATTTTACCTTGAATAAATTAGAGTGTTTCAGGCAAGCTTGGTCTTGAATACATTAGCATGGAATAATAGAATAGGACTCTAGATCCTTTGTTGGTTTCTGGATTTGGAGTAATGATTAATAGGGATAGTTGGGGGCATTAGTATTTAATTGTCAGAGGTGAAATTCTTGGATTTATTAAAGACTAACTTATGCGAAAGCATTTGCCAAGGATGTTT	Eukaryota;Alveolata;Ciliophora;Spirotrichea;Euplotia;Uronychiidae	0.999989	0	0	0	0	0	0	0	0	0	0	0	0	0	0	0	0	0	0	0	0	0	0	0	0	0	0	0	0	0	0	0	0	0	0	0	0	0	0	0	0	0	0	0	0	0	0
21536016db917f812ac82a6358013820	AGCTCCAATAGTGTATATTAATTCTGTTGTGGTTAAAAAGCTCGTAGTCGGATTTCGGAGCGCTGAAGTCAAGGTCCGTCTAAATGGCGTGGCCCGACATCGGCCTCCTCTTTTCTGGGTGACAGCCCCGGAGCCTTCGCGGGCCTCGGTGTGCCGTTCCCAGTCGTTTATTATGACAAACTCAGAGTGTTCAAAGCAGGCGTAATAGTCTTGAATGCTACAGCATGAGATAATAGAAGATGACGATGGTCTTATTTTGTTGGTTTCTAAGGCTGCCGTAATGATTAATAGGGCCAGTTGGGGTCACTCGTATTGAGTTGTCAGAGGTGAAATTCTATGATTTGCTCAAGACGAACTACTGCGAAAGCATGTGACAAGCATGGTT	Eukaryota;Amoebozoa;Lobosa;Tubulinea;Nolandida;Nolandellidae;Nolandella;Nolandella_sp.;	1	0	0	0	0	0	0	0	0	0	0	0	0	0	0	0	0	0	0	0	0	0	0	0	0	0	0	0	0	0	0	0	0	0	0	0	4	0	0	0	0	0	0	0	0	0	0
217358c238bba38e6ccfd9962228abd1	AGCTCCAATAGCGTATATTTAAGTTGTTGCAGTTAAAAAGCTCGTAGTTGGATTTCGGATGGGACTTGCCGGTCCGTCGTTGCGATGTGCACTGGCCAGTCCTATCTTGTTGTCGGGGACTAGCTCCTGGGCTTCACTGTCCGGGACTAGGAGCTGACGAGGTTACTTTGAGTAAATTAGAGTGTTCAAAGCAAGCCTACGCTCTGAATACATTAGCATGGAATAACACGATAGGACTCTGGCTTATCCTGTTGGTCTGTGAGACCAGAGTAATGATTAAGAGGGACAGTCGGGGACATTCGTATTTCATTGTCAGAGGTGAAATTCTTGGATTTATGAAAGACGAACTTCTGCGAAAGCATTTGTCAAGGATGTTT	Eukaryota;Archaeplastida;Chlorophyta;Chlorodendrophyceae;Chlorodendrales;Chlorodendraceae;Tetraselmis;Tetraselmis_rubens;	0.802092	0	0	0	0	0	0	0	0	0	0	0	0	0	0	0	0	0	0	0	0	0	0	0	0	0	0	0	102	0	0	0	0	0	0	0	0	0	0	0	0	0	0	0	0	0	0
21933286ad55d042ea056eeb833a9f7c	AGCTCCAATAGCGTATATTAAAGTTGTTGCAGTTAAAAAGCTCGTAGTTGGACTTGTGGTGGTTCCTGTGGTCCAATTTTGGTACTATCGGGGACTGCCATCTTTGGGTGGATCCTGTGTGGCATTAGGTTGTCGTGCAGGGGATGCCCATCGTTTACTGTGAAAAAATTAGAGTGTTCAAAGCAGGCTTATGCCGTTGAATATATTAGCATGGAATAATGAGATAGGACCTTGGCCTATTTTGTTGGTTTGCGCGCCGAGGTAATGATTAATAGGGACAGTTGTGGGTATTCGTATTCCATTGTCAGAGGTGAAATTCTTGGATTTCTGGAAGACGAACTAATGCGAAAGCATTTACCAAGGATGTTT	Eukaryota;Stramenopiles;Ochrophyta;Bacillariophyta;Bacillariophyta_X;Raphid-pennate;Amphora	0.740386	0	0	0	0	0	0	0	0	0	0	0	0	0	0	0	0	0	0	0	0	0	0	0	0	0	0	0	0	0	0	0	0	0	0	0	0	0	0	0	0	0	0	0	0	0	0
21ba9a3e57c40eceecf08655d4f82ef2	AGCTCCAATAGCGTATATTAAAGTTGTTGCAGTTAAAAAGCTCGTAGTTGGATTTGTGGAGTTGGTGGTGGCGTCCATTAGCTTGGTTTTGCTGCCTCCTCTCCATCCTTGGGAGGAATCTGTGTGGCATTAGGTTGTCGTGCAGGGAAATCCCATCGTTTACTGTGAAAAAATTAGAGTGTTCAAAGCAGGCTTAGGCCGTTGAATATATTAGCATGGAATAATGAGATAGGTCTAGGGTCCTATTTTGTTGGTTTGCGGTTCCTAGAAATGATTAACAGGGACAGTTGGGGGTATTCGTATTCCATTGTCAGAGGTGAAATTCTTGGATTTTTGGAAGACGGACTACTGCGAAAGCATTTACCAAGGATGTTT	Eukaryota;Stramenopiles;Ochrophyta;Bacillariophyta;Bacillariophyta_X;Raphid-pennate	0.823039	0	0	0	0	0	0	0	0	0	0	0	0	0	0	0	0	0	0	0	0	0	0	0	0	0	0	0	61	0	0	0	0	0	0	0	0	0	0	0	0	0	0	0	0	0	0
21bc22dbb6d419aa88f75ec4eb9d94bc	AGCTCCAGTAGTGTATATCAAAGTTGTTGCGGTTAAAAAGCTCGTAGTTGGATTTCCCGGTTTATTTGGGTGTGGGATGTGGTCATTTGAACTGCGGCCATGCCTTTACCGGTGGTTGTGGTCTCCTTCTGGGGGGTTGCGGCATGTACTTTGAACAAATTAGAGTGCTCAAGACAGGCGATTTTTTATTGCTGTGAATAGATTAGCATGGAATACGGGTATAAACTCTCTTCTCGGGATTGTTGTTTTGACGAGGAGGGGGAATGATGGATAGGGACAGGTGTGGGCATTGAGATTGTTACGTCAGAGGTGAAATTCTTAGATCGTAGCAGGATTAGCAGACGCGAAAGCATTTGTCAAGGATGTTT	Eukaryota;Apusozoa;Apusomonadidae;Apusomonadidae_Group-2;Apusomonadidae_Group-2B;Apusomonadidae_Group-2B_X;Apusomonadidae_Group-2B_XX;Apusomonadidae_Group-2B_XX_sp.;	1	0	0	0	0	0	0	0	0	0	0	27	38	0	0	0	0	0	0	0	0	0	0	0	0	0	0	0	0	0	0	0	0	0	0	0	0	0	0	0	0	0	0	0	0	0	0
220da8e356a71ef11b30de27e98b5fdd	AGCTCCAATAGCGTATATTAAAGTTGTTGCAGTTAAAAAGCCCGTAGTTGAAGTTCTGACTGTTCAGGCTCTCAGCCTTGAGGCGAGGGTGCTGACAGTCATCCGCTTGCAAATATAAGTTCGATCTTCACCGGTTGGCTATATGAGCAAGCATTTTACCTTGAGAAAAACAGAGTGTTCCAGGCAGGTTTGTCCGGAATGCATTAGCATGGAATAATAGAACATGACTGAAGTCTATTTATTGGTTTAAGGCTACAGTAATGATTAATAGGAACAGTCGGGGGCATTCGTACTCAGCAGTCAGAGGTGAAATTCTAAGATTTGCTGAAGACGAACTAATGCGAAAGCATTTGCCAAGGATGTTT	Eukaryota;Alveolata;Ciliophora;Oligohymenophorea;Peritrichia_2;Sessilida;Sessilida_X;Sessilida_X_sp.;	0.737885	0	0	0	0	0	0	0	0	0	0	0	0	0	0	0	0	0	0	0	0	0	0	0	0	0	0	0	0	0	0	0	0	0	0	0	0	0	0	0	0	0	413	0	0	0	0
2233291c62e128ace45aa005d0df56bf	AGCTCCAATAGCGTATATTAAAGTTGTTGCAGTTAAAAAGCTCGTAGTTGGATTTGTGGTGTCTCCTGCGGTCCGTACTATTCGGTACTGTGGGAGCTACCATCCTTGGGTGGAACCAGTGTGGCATTAGGTTGTCGCGTTGGGGATGCCCATCTTTTACTGTGAAAAAATTAGAGTGTTCAAAGCAGGCTTACGCCGTTGAATATATTAGCATGGAATAATAAGATAGGACCTTGGTACTATTTTGTTGGTTTGCGCACCAAGGTAATGATTAATAGGGACAGTTGGGGGTATTCGTATTCCATTGTCAGAGGTGAAATTCTTGGATTTTTGGAAGACGAACTACTGCGAAAGCATTTACCAAGGATGTTTTCATCAATCAAGAACGAAAG	Eukaryota;Stramenopiles;Ochrophyta;Bacillariophyta;Bacillariophyta_X;Raphid-pennate	0.920891	0	0	0	0	0	0	0	0	0	0	0	0	0	0	0	0	0	0	0	0	0	0	0	0	0	0	0	2	0	0	0	0	0	0	0	0	0	0	0	0	0	0	0	0	0	0
223c525dea2cb0547670a2fc9c137bf4	AGCTCCAATAGCGTATATTAAAGTTGTTGCAGTTAAAAAGCTCGTAGTTGGATTTCGGGCGTGTGCGCATGGTCCGCCGAAAGGTGTGCACTGTGCCTGTGCGCGCTCTCTTTCCGTAGGCTGCGTGTGCCCTTAACTGGGTGTGCGTGGAATGCGGATCGTTTACTTTGAATAAATTAGAGTGTTCAAAGCAGGCTTTCGCTTGGATACATTAGCATGGAATAATGGAATAGGACTTTGGTTCTATTTTGTTGGTTTCTAGGACCGGAGTAATGATTAATAGGGATAGTTGGGGGCATTAATATTTAATTGTCAGAGGTGAAATTCTTGGATTTATGAAAGATTAACTTCTGCGAAAGCATTTGCCAAGGATGTTT	Eukaryota;Apusozoa;Hilomonadea;Planomonadida;Planomonadidae;Planomonadidae_Group-1;Planomonas;Planomonas_sp.;	0.764577	0	0	0	0	0	0	0	0	0	0	0	27	0	0	0	0	0	0	0	0	0	0	2	0	0	0	5	0	0	0	0	0	9	0	0	0	0	0	0	0	0	0	7	38	0	0
22600891d788c780752e52759e8db152	AGCTCCAATAGCGTATATTAAAGTTGTTGCGGTTAAAAAGCTCGTAGTTGGATTTCTGCTGAGGATGACCGGTCCGCCCTCTGGGCAGGTATCTGGCTCAGCCTTGGCATCTTCCTGAAGAACGTAGCTGCACTTGACTGTGTGGTGCGGTATTTAGGACATTTACTTTGAGGAAATTAGAGTGTTTCAAGCAAGCGCACGCCTTGAATACATTAGCATGGAATAATAAGATAGGACCTCGGTTCTATTTTGTTGGTTTCTAGAGCTGAGGTAATGATTGATAGGGATAGTTGGGGGCATTCGTATTTAACTGTCAGAGGTGAAATTCTTGGATTTGTTAAAGACGGACTACTGCGAAAGCATTTGCCAAGGATGTTT	Eukaryota;Alveolata;Dinoflagellata;Dinophyceae;Suessiales;Suessiaceae	0.999988	0	0	0	0	0	0	0	0	0	0	0	0	0	0	0	0	0	0	0	0	0	0	0	0	0	0	0	0	0	0	0	42	0	0	0	0	0	0	0	0	0	0	0	0	0	0
22bb9789ce2d36c8b1c15de80dea9269	AGCTCCAAGAGCGTATATTAAAGTTGTTGCAGTTAAAAAGCTCGTAGTTGAACCTTGGGAAGGCCGCGCCGGTCCGCCTTTTGGCGAGCACTGGAGGCAGCCTTCCTTTCCTCTGCCATCCCTTCGGGGCGGGCAGACTATTACTTTGAGTAAATGAGAGTGTTCAAAGCAGGCGTACGCTTGAATCTGTTAGCATGGAATAATAGAATAGGACGCATGGTTCTATTTTGTTGGTTTCTAGGACCATCGTAATGATTAATAGGGACGGTCGGGGGCATCAGTATTCAGTTGTCAGAGGTGAAATTCTTGGATTTACTGAAGACTAACTACTGCGAAAGCATTTGCCAAGGACGTTT	Eukaryota;Opisthokonta;Fungi;Ascomycota;Saccharomycotina;Saccharomycetales;Candida;Candida_intermedia;	0.99203	0	0	0	0	0	0	0	0	0	0	0	0	0	0	0	0	0	0	0	0	0	0	9	0	0	0	0	0	0	0	0	0	0	0	0	0	7	0	0	0	0	0	0	0	0	0
22d46ebe1220cba9e2912fa51024ee10	GGCTCCAGTAGCGTATATTAAAGTTGTTGCAGTTAAAAAGCTCGTAGTTGGATTTCTGATATTGAGTAATACAAACTAATAGTTTACTACTAGTTTAAGTATTTGTCTCAAATCATCATTTTTAGATACTATTTATGGAATCTAGGAACTTTTACTTTGAAAAAATTAGAGTGTTTAAAGCAGGCTTAACGCTATGAATACATTAGCATGGAATAATAATATAGGACCATTGTTCTATTTTGTTGGTCTTAAGGACAGGGTAATGATTGATAGGGACAGTTGGGGGTGCTAGTATTAAATGGCCAGAGGTGAAATTCTATGATTCTTTTAAGACTAACTTATGCGAAAGCATTCACCAAGGATGTCT	Eukaryota;Rhizaria;Cercozoa	0.998374	0	0	0	0	0	0	0	0	0	0	0	0	0	0	0	0	0	0	0	0	0	0	0	0	0	0	0	0	0	0	0	0	0	0	0	0	0	0	0	0	0	0	14	0	0	0
22e98bcffd405e68adc5234312a1b5bf	AGCTCCAATAGTGCATATTAAAGTTGTTGCAGTTAAAAAGCTCGTAGTTGGATTTGTGGTCGTCCGCGTGGCCCTCTCTGAGGCGCCGTCGCGGACGTCCATCCTTGGGCGGATGTTGCGTGGCATTCGGTTGTCGCGCAGGGGATGCCCATCGTTTACTGTGAAAAAATCAGCGCGTTCAAAGCAGGCTTATGCCGTTGAATGTATTAGCATGGAATAATGAGATAGGACCACGGTGCTATTTTGTTGGTTTGCGCACTGGGGTAATGATTAATAGGGACAGTTGGGGGTATTCGTATTGCATTGTCAGAGGTGAAATTCTTGGATTTCTGCAAGACGAACTACTGCGAAAGCATTTACCAAGGATGTTT	Eukaryota;Stramenopiles;Ochrophyta;Bacillariophyta;Bacillariophyta_X;Raphid-pennate;Cocconeis	0.99983	0	0	0	0	0	0	0	0	0	0	0	0	0	0	0	0	0	0	0	0	0	0	0	0	0	0	0	0	0	0	0	0	0	0	0	0	0	0	0	0	0	0	0	0	0	0
22e9f6d788292b5fe0de06f1d98b5b78	AGCTCCAATAGCGTATATTAAAGTTGTTGCAGTTAAAAAGCTCGTAGTTGAAGTTCTGATTGCTCAGGCTCTCAGCCTAAGGCGGGAGTTCTGACAGTCATCCGCTTGCAAGCATACGTTCGGCCTTAACAAGCTGGCTATGTGAGTAAGCATTTTACCTTGAGAAAAACAGAGTGTTCCAGGCAGGTTTGTCCGGGATGCATTAGCATGGAATAATAGAACATGACTGAAGTCTATTTATTGGTTTAAGGCTTTAGTAATGATTAATAGGAACAGTCGGGGGCATTCGTACTCAGCAGTCAGAGGTGAAATTCTAAGATTTGCTGAAGACGAACTAATGCGAAAGCATTTGCCAAGGATGTTT	Eukaryota;Alveolata;Ciliophora;Oligohymenophorea;Peritrichia_2;Sessilida;Pseudovorticella;Pseudovorticella_paracratera;	0.998335	12	0	0	0	0	0	0	0	0	0	0	0	0	0	0	0	0	0	0	0	0	0	0	0	0	0	0	0	0	0	0	0	0	0	0	0	0	0	0	0	0	0	0	0	0	0
232a591c0d3365feecbe58c03981fab9	AGCTCCAATAGCATATATTAAAGTTGTTGCGGTTAAAAAGCTCGTAGTCGGATTTCTGCCGAGGACGACCGGTCCGCCCTCTGGGTGAGCATCTGGCTTGATCTGGGCATCTTCTTGGAGAGCGTAGCTGCACTTGACTGTGTGGTGCGGTATCCAGGACTTTTACTTTGAGGAAATTAGAGTGTCCTAAGCAGGCCCATGCCATATATACATTAGCATGGAATAATAGGGTAGGACCTACTCTCTATTTGTTGGTTTCTAGAGCAGAGGTAATGGTCAATGGGGATAGTTGGGGGTATCCGTATTTGACTGTCAGAGGTGAAATTCTTGGATTTGTCAAAGACGAACCAATGCGAAAGCATTTGCCAGAGATGTTT	Eukaryota;Alveolata;Dinoflagellata;Dinophyceae;Prorocentrales;Prorocentraceae;Prorocentrum;Prorocentrum_lima;	0.999913	0	0	0	0	0	0	0	0	0	0	0	0	0	0	0	0	0	0	0	0	0	0	0	0	0	0	0	0	0	0	0	6	0	0	0	0	0	0	0	0	0	0	0	0	0	0
232b437d93c1fbcfde3e1d5288aa89bc	AGCTCCAGAAGCGTATGCTAATGTTGTTGCAGTTAAAAAGCTCGTAGTTGAATTTCTGGTGTGTCTGACCGAGCCTTTGGGCGTATGCTCACTGTTTTGCTCGTTGTTCGGACTGGCCATGTTAGATGTCTGATAAGGACATCTTCATTCACTGTAAAGAAAGCAGAGTGTTCAAAGCAGGTTGTAAAATCTGAATGTTTATTATGGGATGATGAGATAGGGCTCGCGCGCTATTTTGTTGGTTTGCACGCGCAAGTAATGGTGGATGGGAACAGTTGGGGCTATTCGTATTTGGCAGCTAGAGGTGAAATTCTTGGATCTGCAAAAGACGAACCAAGGCGAAGGCATTTAGCAAAGATGTTT	Eukaryota;Stramenopiles;Sagenista;Labyrinthulomycetes;Thraustochytriales;Thraustochytriaceae	0.998118	0	0	0	0	0	0	0	0	0	0	0	0	0	0	0	10	0	0	0	64	0	0	0	17	9	0	0	0	0	0	0	0	0	0	0	0	0	0	0	0	0	0	0	0	0	0
233b0ae5509f3e10b8318d7cd42e02a9	AGCTCCAATAGCGTATATTAAAGTTGTTGCAGTTAAAAAGCTCGTAGTTGGATTTCTGGTGGGGGAGGTCTGGTCCGCCCCGCTTTTAGGGTGCGAGTACCGGTCGCCTCTCCGCCATCCCTTGGCGCCGTGTGCGGCGGTTCGGTTTGTTCCGCGCCCCGCGCATTTTAAAGCGGTCGCCATCGTTTACTTTGAAGAAATTAGAGTGTTTCAAGCAGGCATCCTTGCCGTTGAATACATTAGCATGGAATAATGAGATAGGACTTGGGTTCTATTTTGTTGGTTTCTAGGGCCGAAGTAATGATTGATAGGGATCGTTGGGGGTGCTTGTATTGAGCGGCCAGAGGTGAAATTCTTGGATTCGCTCAAGACAAACTAATGCGAAAGCATTCACCAAGG…	Eukaryota;Alveolata;Dinoflagellata;Dinophyceae;Prorocentrales;Prorocentraceae;Prorocentrum;Prorocentrum_nanum;	0.921173	0	0	0	0	0	0	0	0	0	0	0	0	0	0	0	0	0	0	0	5	0	0	0	0	0	0	0	0	0	0	0	0	0	0	0	0	0	0	0	0	0	0	0	0	0	0
237c32495153f03d1d87d7f775bf2c73	AGCTCCAATAGCGTATATTAAAGTTGTTGCAGTTAAAAAGCTCGTAGTTGGATTTGTGGCGTACGGTGGGTCCCAGGCACTTGTTGTCTGAGCGTCCTGGCGTTGCCATCCTTGGGTGGAACCTGCGTGGCATTAGGTTGTCGTGCAGGGGATGCCCATCGTTTACTGTGAAAAAATTAGAGTGTTCAAAGCAGGCTTATGCCGTTGAATATATTAGCATGGAATAATGAGATAGGACTTTGTTGCTATTTTGTTGGTTTGCGCGAGAAGGTAATGATTAATAGGGACAGTTGGGGGTATTCGTATTCCATTGTCAGAGGTGAAATTCTTGGATTTCTGGAAGACGAACTACTGCGAAAGCATTTACCAAGGATGTTT	Eukaryota;Stramenopiles;Ochrophyta;Bacillariophyta;Bacillariophyta_X;Raphid-pennate;Navicula;Navicula_sp.;	0.713417	26	203	37	578	16	666	43	177	18	1338	9	8	14	0	7	11	16	12	24	318	0	0	0	0	0	0	0	706	0	0	0	0	0	0	0	0	0	0	0	0	0	0	0	0	9	0
23a1571b1ad15049717cf961825d76e2	AGCTCCAATAGCGTATATTAAAGTTGTTGCAGTTAAAAAGCTCGTAGTTGAACTTCTGTGCATCTCCAGTTCTGGCTTCGGTCAAGCTGTGAGGTGTACATCCGCTTGCAAACTTAGCCTGGCATTCAGTTGTCAACTAAGGGAGTAGGCTTTTTACTTTGAAAAAATTAGAGTGTTTCAAGCAGGCAATGGCTCGAATACATTAGCATGGAATAATGGAATAGGACTTTTGTCCATTTGGTTGGTTATTGGGCATGAGTAATGATTAAAAGGGACAGTTGGGGGCATTAGTATTTATTAGTCAGAGGTAAAATTCTTGGATCTAATAAAGACTAACTTATGCGAAAGCATTTGCCAAGGATGTTT	Eukaryota;Alveolata;Ciliophora;Oligohymenophorea;Scuticociliatia_1;Philasterida;Metanophrys;Metanophrys_similis;	1	0	0	0	0	0	0	0	0	0	0	0	0	0	0	0	0	0	0	0	0	0	0	0	0	0	0	0	0	0	0	0	0	0	0	0	0	0	0	0	0	0	0	0	0	0	20
23bdb7f2f088baf4e23d2ce29c8c2497	AGCTCCAATAGCGTATATTAAAGTTGTTGCAGTTAAAAAGCTCGTAGTTGAACTTCTGTACGTGTTCTGTTCTGGCTCCGGTCAAGCAGTAACGCGTGCATCCGCTTGCAAACTAGTCTCGTCCTTAACTGGTCGTTCTAGGGAGTAAGCCCTTTACTTTGAAAAAATTAGAGTGTTTCAGGCAGGCAATGGCTCGAATACATTAGCATGGAATAATGGAATAGGACTTTTGTCCATTTGGTTGGTTATTGGACATGAGTAATGATTAAAAGGGACAGTTGGGGGCATTGGTATTTAACAGTCAGAGGTGAAATTCTTGGATTTGTTAAAGACTAACTTATGCGAAAGCATTTGCCAAGGATGTTTTCATTAATCAAGAACGAAAT	Eukaryota;Alveolata;Ciliophora;Oligohymenophorea;Scuticociliatia_1;Cohnilembidae;Cohnilembus;Cohnilembus_sp.;	0.804583	0	0	0	0	0	0	0	0	0	0	0	0	0	0	0	0	0	0	0	0	0	0	0	0	0	0	0	0	0	0	0	0	10	0	0	0	0	0	0	0	0	0	0	0	0	0
23ee60b0178689bef7815a33bfa30153	AGCTCCAATAGCGTATACTAACGTTGTTGCAGTTAAAAGGCTCGTAGTCGAACTTATGATCCTGTGAACCTGGCCCAACTTCTAGTAAGTTGCGTGCCGGTGTGCACGGATCATTCTTCTGAAGAGCTGTGCTACCCTTGATTGGGTCGGTACTGGGATTCAGATCTTTTACTGTGAGTAAATCAAAGTGCTCAAAGCAGGCTTCAATGCTTGTATGGTTCAGCATGGAATAATAAGATAAGACTTGGGTTTTGTTTTGTTGGCTATAACGAACCAAAGTAATGATTGAAAGGGATAGTTGGGGGTGCTAGTATTTAATGGTCAGCGGTGAAATGCGAAGACCCATTAAAGACTAACTTATGCGAAAGCATTCACCAAGGATATCT	Eukaryota;Rhizaria;Cercozoa;Endomyxa;Vampyrellida;Vampyrellida_X;Vampyrellida_clade_B;Vampyrellida_sp.;	0.999993	0	0	0	0	0	0	0	0	0	0	0	0	0	0	0	0	0	0	0	0	0	0	0	0	0	0	0	0	0	0	0	0	0	0	0	0	0	0	0	0	0	0	0	0	0	0
2455723b47acf044ad8284d3d8dc44db	AGCTCCAATAGCGTATATTAATATTGTTGCAGTTAAAAAGCTCGTAGTTGAATGAGTCAAGGCGAATGCCTTGTAATACATGGAGAGTTTCATTCTATTAATTTGGGATGTTGACAATCCATGTCTTTTACCGTGAAAAAAGTAGGGTGTTCAAAACAGGCGATTGCTCGGATATACTAGCATGGAATGATAAGATACGACTCTGGTCGAATTTTGTTGGTGTTGATTGGTGTAATGAATAATAGGAACAGTCGTGGGTATCCGTATGAGCATGTCAGAGGTGAAATTCTTGGATTTTGCTCAGACGAACCACTGCGAAAGCATTTACCAAGAATGTTT	Eukaryota;Stramenopiles;Sagenista;Labyrinthulomycetes;Labyrinthulales;Labyrinthulaceae;Labyrinthula;Labyrinthula_sp.;	0.99992	0	0	0	0	0	0	0	0	0	0	0	0	0	0	0	0	0	0	0	0	0	0	0	0	0	0	0	0	0	0	0	0	0	0	0	0	0	0	0	0	0	0	4	0	0	0
246205ef91ee916a29277fced48ba398	AGCTCCAATAGCGTATATTAAAGTTGTTGCAGTTAAAAAGCTCGTAGTTGGATTTGTGGTGTACTTCGGCGGCCCGTCACAATGTGATGGAGCTTGCTGAAGTCGCCATCCTTGGGTGGATCCTGTGTGGCATTAAGTTGTCGTGCAGGGGATGCCCATCGTTTACTGTGAAAAAATTAGAGTGTTCAAAGCAGGCTTATGCCGTTGAATATATTAGCATGGAATAATAAGATAGGACCTTGGTACTATTTTGTTGGTTTGCGCACCAAGGTAATGATTAATAGGGACAGTTGGGGGTATTCGTATTTCATTGTCAGAGGTGAAATTCTTGGATTTTTGAAAGACGAACTACTGCGAAAGCATTTACCAAGGATGTTT	Eukaryota;Stramenopiles;Ochrophyta;Bacillariophyta;Bacillariophyta_X;Raphid-pennate;Cylindrotheca;Cylindrotheca_closterium;	0.994456	0	0	0	0	0	0	0	0	0	0	0	0	0	0	0	0	0	0	0	0	0	0	0	3798	236	198	0	0	0	0	0	0	0	0	0	0	0	0	0	0	0	0	13	0	0	0
2462e051e910f522abac644c242eb07c	AGCTCCAATAGTGTATATTAAAGTTGTTGCAGTTAAAAAGCTCGTAGTTGGATTTCTGGACTCTGACGGTGGTTCCGCCTCTGGTGGATACTGACTGTTGGGGTCCATCCTCCCGAAGACACCTCGTGTCCTTTACTGGATGCGTTGTGGACTCGGGACTTTTACTTTGAAAAAATTAGAGTGTTCAAAGCAGGCTTACGCTTGAATACTTCAGCATGGAATAATGGAATAGGACTTCGGGCTTATTTTGTTGGTTTCTAATACCGAAGTAATGATTAAAAGGGACAGTTGGGGGCATTAGTATTTCATTGTCAGAGGTGAAATTCTTAGATTTATGAAAGACTAACTACTGCGAAAGCATTTGCCAAGGATGTTT	Eukaryota;Opisthokonta;Choanoflagellida;Choanoflagellatea;Craspedida;Salpingoecidae_Group_C2;Salpingoecidae_Group_C2_X;Salpingoecidae_Group_C2_X_sp.;	0.983175	0	0	0	0	0	0	0	0	0	0	0	0	0	0	0	0	0	0	0	0	0	0	0	0	0	0	0	0	0	0	0	0	0	0	0	5	0	0	0	0	0	0	0	0	0	0
247d2634d446bd432d3fe96f0b127e44	AGCTCCAATAGCGTATATTAAAGTTGTTGCGGTTAAAAAGCTCGTAGTTGGATTTCTGCCGAGGACGACCGGTCCGCCCTCTGGGTGAGTATCTGGCTCGGCCTGGGCATCTTCTTGGAGAACGTAGCTGCACTTGACTGTGTGGTGCGGTATCCAGGACTTTTACTTTGAGGAAATTAGAGTGTTTCAAGCAGGCACACGCCTTGAATACATTAGCATGGAATAATAAGATAGGACCTTGGTTCTATTTTGTTGGTTTCTAGGGCTGAGGTAATGATTAATAGGGATAGTTGGGGGCATTCGTATTTAACTGTCAGAGGTGAAATTCTTGGATTTGTTAAAGACGGACGACTGCGAAAGCATTTGCCAAGGATGTTT	Eukaryota;Alveolata;Dinoflagellata;Dinophyceae	1	0	0	0	0	0	0	0	0	0	0	0	0	0	0	30	0	0	0	0	0	0	0	0	0	0	0	0	0	0	0	0	0	0	0	0	0	0	0	0	0	0	0	0	0	0	0
24854b4030f461b38f68daf6c5f158ed	AGCTCCAATAGCGTATATTAAAGTTGTTGCAGTTAAAAAGCTCGTAGTCTGACTCTTGGCGGGCGTTGAGCGTCCGTGGCGTAAGTCACGCGCACGCGATATTACGCTCTTGCCATTGTACTCCAGAGGAACCTGTTCGCTTTTCATTAAGCGGGCGGTTGGGATTCTGGTAGTTTACTTTGAGAAAAATAGAGTGTTCAAAGCAGGCGATTTCGCCTTGAATACGTTAGCATGGGATAATGGAATAGGACATTGGTTTTCCTATTTTGATGGTTTAAGGACCGATGTAATGATTAATAGGGACAGTTGGGGACATTCATATTCCGTGGCTAGAGGTGAAATTCTTGGATTCACGGAAGATGAACTACTGCGAAAGCATTTGTCAAAGATGTTT	Eukaryota;Hacrobia;Centroheliozoa;Centroheliozoa_X;Centroheliozoa_XX;Centroheliozoa_XXX;Centroheliozoa_XXXX;Centroheliozoa_XXXX_sp.;	0.818644	0	0	0	0	0	0	0	0	0	0	0	0	0	0	0	0	0	0	0	0	0	0	0	0	0	0	0	0	125	0	0	0	0	0	0	0	0	0	0	0	0	0	0	0	0	0
24956fa8a5a40c3c34af9f2262536eed	AGCTCCAATAGCGTATATTAAAGTTGTTGCAGTTAAAAAGCTCGTAGTCTGACCTATTTGGCCTTTTCATTTGATTTGCCCGCATGCTGAGGCCGCCGACCTTCGGGAAGGCGTGTCTTTTGTGCGGGGGGCCAAATTGTACTTCGGAGGAACTTGGGTACTCTTCATTGAGTGCCCTGTGGGATTCCGATAGTTTACTTTGAGAAAAATAGAGTGTTCAAAGCAGGCATGTATGCCCTTGAATACGTTAGCATGGGATAATGAAATAGGACATTGGTTCTCTATTTCTGATGGTTTGAAGGACCGATGTAATGATTAATAGGGACAGTTGGGGACATTCATATTTCATGGCTAGAGGTGAAATTCTTGGATTCATGGAAGATGAACTACTGCGAAAGC…	Eukaryota;Hacrobia;Centroheliozoa;Centroheliozoa_X;Centroheliozoa_XX;Centroheliozoa_XXX;Centroheliozoa_XXXX;Centroheliozoa_XXXX_sp.;	0.979452	0	0	0	0	0	0	0	0	0	0	0	0	0	0	0	0	0	0	0	0	0	0	0	0	0	0	0	0	83	0	0	0	0	0	0	0	0	0	0	0	0	0	0	0	0	0
24fb7112e0351a0b148a92b495336282	AGCTCCAATAGCATATGTTAAAGTTGTTGCGGTTGAAAAGCTCGTAGTTGGACTTCTGCTGAGGGTCGCTGGCCTGCCTCAGTATCTTCTCAGAGAATGTAGATGCACTTGACGGTGTGGTGCGCTATCTGGGGCTGTTACTTTGAGGAAATTAGAGTGCTTCAAGCAGGTCGTTGTCCTGAATACATTAGCATGGCATGATAAGTCAGAACCTCTTGTTCTTCTTTGATGGTTTTAGAGCAGAGGGGAGGGTGAATAGGAACAGTTGGGGGTATTCATATTTGACTGTCAGAGGTGAAATTCTTGGATTTGTGAAAGATGGACTACTGCGAAAGCATCTGCCAGAGATGTCT	Eukaryota;Alveolata;Dinoflagellata;Dinophyceae;Peridiniales;Peridiniales_X;Bysmatrum;Bysmatrum_gregarium;	0.999983	0	0	0	0	0	0	0	0	0	0	0	0	0	0	0	0	0	0	0	0	0	0	0	0	0	0	0	15	0	0	0	0	0	0	0	0	0	0	0	0	0	0	0	0	0	0
2550264492f34ef491447bf82bfcaa5e	AGCTCCAATAGCGTATATTAAAGTTGTTGCAGTTAAAAAGCTCGTAGTTGAATTTCTGTATAATCCCGGTGCCGGCTCCTGTCGAACCGTGGATTGTACATCCGCTTACAAACTTAGCCCGGTCTTCATTGGTCGACTAAGGGAGTAGGCCCTTTACTTTGAAAAAATTAGAGTGTTTCAAGCAGGCATTGGCTCGAATACATTAGCATGGAATAATGGAATAGGACTAGTGTCCATTTGGTTGGTTATTGGACGTTAGTAATGATTAACAGGGACAGTTGGGGGCATTAGTACTTAACAGTCAGAGGTGAAATTCTTGGATTTGTTAAAGACTAACTTATGCGAAAGCATTTGCCAAGGATGTTT	Eukaryota;Alveolata;Ciliophora;Oligohymenophorea;Scuticociliatia_1;Philasterida;Paranophrys;Paranophrys_magna;	0.999719	0	0	0	0	0	0	0	0	0	0	0	0	0	0	0	0	0	0	0	0	0	0	0	0	0	0	0	0	0	0	0	0	0	0	0	0	0	0	0	0	0	0	0	0	0	0
256f41ecd261bc6461cbdbe49c6b4f4c	AGCTCCAGAAGCGTATGCTAACGTTGTTGCAGTTAAAAAGCTCGTAGTTGAACGTCTGTCGGTTCGGTTTGTGGGGCGAACGCTCTGCAGACCGGCCTTTTTTTTCTTGGCCCTCTCTTTAGGGAGGGCTTCTTTCACTGTAAACAAATTGGAGTGCTCCACGCAGGTCGTTGGGACCTGGACAATTGTTATGGGATGATGAGATAGGGCTCGGGCACTATTTTGTCGGTTTGCATGCCTGGGTAATGGTGAATAGGAACAGTTGGGGATATTCGTATTTAGCGGTCAGAGGTGAAATTCTTGGATTCGGGAAAGACGAACAACTGCGAAGGCATTTATCAAAGATGTTTTCATCAATCAAGAACGAAA	Eukaryota;Stramenopiles;Sagenista;Labyrinthulomycetes;Thraustochytriales;Thraustochytriaceae;Thraustochytriaceae_X;Thraustochytriaceae_X_sp.;	0.882121	0	0	0	0	0	0	0	0	0	0	0	0	0	0	0	0	0	1	0	0	0	0	0	0	0	0	0	0	0	0	0	0	0	0	0	0	0	0	0	0	0	0	0	0	0	0
257042c085a7e4f136b8bd896660ecbf	AGCTCCAATAGCGTATATTAAAGTTGTTGCAGTTAAAAAGCTCGTAGTTGGATTTGTGGTTGATTGGAGTCGCCCGACACTCGTGTCGGTGTGGGCTTTGGTCGCCATCCTTGGGTGGAGCCTGTGTGGCATTAGGTTGTCGTGCAGGGGATGCCCATCTTTTACTGTGAAAAAATTAGAGTGTTCAAAGCAGGCTTACGCCGTTGAATATATTAGCATGGAATAATAAGATAGGACCTTGGTACTATTTTGTTGGTTTGCGCACCAAGGTAATGATTAATAGGGACAGTTGGGGGTATTCGTATTCCATTGTCAGAGGTGAAATTCTTGGATTTTTGGAAGACGAACTACTGCGAAAGCATTTACCAAGGATGTTTTCATCAATCAAGAACGAAAG	Eukaryota;Stramenopiles;Ochrophyta;Bacillariophyta;Bacillariophyta_X;Raphid-pennate	0.852282	0	0	0	0	0	0	0	0	0	0	0	0	0	0	0	0	0	0	0	0	0	0	0	0	0	0	0	0	0	0	0	0	0	0	0	0	0	0	0	0	0	0	0	0	0	0
2593808c09c5054093c45abba06014a8	AGCTCCAATAGCGTATATTAAAGTTGTTGCAGTTAAAAAGCTCGTAGTTGGATTTGTGGTTTGGCTGTCCGGTTCTTCGCTCCGCGTTGATACCTGGCCGGTCGGATCATCCTTGGGTGGAATCTGTGTGGCATTAAGTTGTCGTGCAGGGGATGCCCATCGTTTACTGTGAAAAAATTAGAGTGTTCAAAGCAAGCTTACGCTGTTGAATATATTAGCATGGAATAATAAGATAGGACCTCGGTACTATTTTGTTGGTTTGCGTACCGATGTAATGATTAATAGGGACAGTTGGGGGTATTCGTATTCCATTGTCAGAGGTGAAATTCTTGGATTTTTGGAAGACGAACTACTGCGAAAGCATTTACCAAGGATGTTT	Eukaryota;Stramenopiles;Ochrophyta;Bacillariophyta;Bacillariophyta_X;Araphid-pennate;Synedra;Synedra_sp.;	0.928099	0	0	0	0	0	0	0	0	0	0	0	0	0	0	0	0	0	0	0	0	0	0	0	0	0	0	0	8	0	0	0	0	0	0	0	0	0	0	0	0	0	0	0	0	0	0
25c4c5357de4f36d0c7a219e03a06943	AGCTCCAATAGCGTATATTAAAGTTGTTGCAGTTAAAAAGCTCGTAGTTGGATTTCTGGTAGGAGTGACCGTTCCGAGCTTGATTGTTCGTGTATTGTGTTTTCTCCAGCCACCCTTGTGGAGAACTTTTCTTGCATTAATTTGTAGGGATTGGGACCCGCATCATTTACTGTGAAAAAATTAGAGTGTTTAAAGCAGGCAATCGCTTGAATACATTAGCATGGAATAATAAGATAGGACTTTGGTACTATTTTGTTGGTTTGCATACCAAATTAATGATCAACAGGAACAGTTTGAGGATATTCGTATGAACATGTCAGAGGTGAAATTCTTGGATTTTGATCAGACGAACTACTGCGAAAGCATTTATCAAGGATGTTTTCATCGATCAAGAACGAA…	Eukaryota;Stramenopiles;Sagenista;Labyrinthulomycetes;Thraustochytriales;Thraustochytriaceae;Labyrinthuloides;Labyrinthuloides_minuta;	0.996542	0	0	0	0	0	0	0	0	0	0	0	0	0	0	0	0	0	0	0	0	0	0	0	2	0	0	0	0	0	0	0	0	0	0	0	0	0	0	0	0	0	0	0	0	0	0
264a888c37b073ff733bdd7bfae03c86	AGCTCCAGTAGCGTATATTAAAGTTGTTGCAGTTAAAAAGCTCGTAGTTGGATTTCTGCTATTACGCCCTAGCCTACTACAAGTTGTAGTTGTGCTGGTGTGCGTCTAGCTTCCTTCTAGGGAGGCTTCTGGCGTCTTCGTGCGTCAGTTGTTCGATCTAGATCTTTTACTTTGAATAAATTAGAGTGTTCAAAGCAGGCAATCGCTGTGAATACATTAGCATGGAATAATAATATAGGACTTCGCTTCTATTTTGTTGGTTTTCAGAACGAAGTAATGATTGATAGGGATAGTTGGGGGTGCTAGTATTGTCCGACTAGAGGTGAAATTCGTACTCGGCTAAGACTAACTTATGCGAAAGCATTCACCAAGGATGTCT	Eukaryota;Rhizaria;Cercozoa	0.999156	0	0	0	0	0	0	0	0	0	0	2	0	0	0	0	0	0	0	0	0	0	0	0	0	0	0	0	0	0	0	0	0	71	0	0	0	0	0	0	0	0	0	12	8	0	6
2657b2e42080aa09dac4535e82036e1f	AGCTCCAATAGCGTATATTAAAGTTGTTGCAGTTAAAAAGCTCGTAGTTGAATTTCTGGTGGGCACGCCGGTCTTCCATCGTGTTGTACTGGGCGTTGTCAACCATCCTTGTGGAGAGGGCGGCGCATTCATTTGTGTCGTTGGATCTGCATCATTTACTGTGAAAAAATTAGAGTGTTTAAAGCAGGCAATCGCTTGAATACATTAGCATGGAATAATAAGATAGGACTTCGGTCTATTTTGTTGGTTGAGAACCGAGGTAATGATTAATAGGGATAGTTGGGGGTATTCATATTTAATTGTCAGAGGTGAAATTCTTGGATTTATGAAAGATGAACAACTGCGAAAGCATTTACCAAGGATGTTT	Eukaryota;Stramenopiles;Opalozoa;Bicoecea;Bicoecales;Bicoecaceae	0.700676	0	0	0	0	0	0	0	0	0	0	0	0	0	0	0	0	0	0	0	0	0	0	0	0	0	0	0	0	0	0	0	0	32	0	0	0	0	0	0	0	0	0	0	31	0	0
2673fe3233cdda455d4a6f0b5953a2bb	AGCTCCAATAGCGTATATTAACGTTGTTGCAGTTAAAAAGCTCGTAGTTAGATTTCTGGTTTGGTACGACCTGGCGAGACTTTGTTTCGACCGTGCGTCGTTTCCTAGCCATCTTCACTTTCTTTTAAGGGAGTGTCATTTACTGTAAAAAAATTAGAGTGTTTCAAGCAGCAAGTATTGCAGAATATATTAGTATGGAATGAAAAGATAGGGCTTTCGCGCTATTTTGTTGGTTTGCCACGAAAGCAATGATTAAAAGGAACAGTTGGGGGTATTCGTATTTAGTTGTCAGAGGTGAAATTCTTGGATTTACAAAAGACGAACTACTGCGAAAGCATTTATCAAGGATGTTT	Eukaryota;Stramenopiles;Sagenista;Labyrinthulomycetes;Thraustochytriales;Thraustochytriaceae;Thraustochytriaceae_X;Thraustochytriaceae_X_sp.;	0.989235	0	0	0	0	0	0	0	0	0	0	0	0	0	0	0	0	0	0	0	0	0	0	0	0	0	0	0	0	0	0	0	0	0	0	0	0	0	0	0	0	0	0	0	0	0	18
268010105ac1a4fd1bb2f012e1761986	AGCTCCAGAAGCGTATGCTAACGTTGTTGCAGTTAAAAAGCTCGTAGTTGAAGGTTTGTCGGTTGGGTCTGTGGGGCGAACGCCTCGCGGGCCGGCCTTTTTCTTTCCTGGCTCTTTCTTTTGAGGGGGCCTCGTTCACTGTAAACAAATTGGAGTGCTCCACGCAGGTCGTTGGGACCTGGACAATTGTTATGGGATGATGAGATAGGGCTCGGGCACTATTTTGTCGGTTTGCATGCCTGGGTAATGGTGAATAGGAACAGTTGGGGATATTCGTATTTAGCGGTCAGAGGTGAAATTCTTGGATTCGGGAAAGACGAACAACTGCGAAGGCATTTATCAAAGATGTTT	Eukaryota;Stramenopiles;Sagenista;Labyrinthulomycetes;Thraustochytriales;Thraustochytriaceae;Thraustochytriaceae_X;Thraustochytriaceae_X_sp.;	0.948612	0	0	0	0	0	0	0	0	0	157	0	0	0	29	0	47	0	135	0	0	0	0	0	0	0	0	0	0	0	0	0	98	0	0	0	34	0	0	0	0	0	0	0	0	0	0
26abcc4784b46a5932a283430073abe6	AGCTCCAATAGCGTATATTAAAGTTGTTGCAGTTAAAAAGCTCGTAGTTGAAGTTTGGGCCTGGGCGGGCGGTCTACCTATGGTGAGTACTGCTGCGGCCGGGTCTTTCCTTCTGGCTAGCCCTTGTGGCGAACCAGGACGATTACTTTGAGGAAATTAGAGTGTTCAAAGCAGGCCTTTGCTCGAATATATTAGCATGGAATAATAGAATAGGACGTATGGTTCTATTTTGTTGGTTTCTAGGACCATCGTAATGATTAATAGGGACGGTCGGGGGCATCAGTATTCAGTTGTCAGAGGTGAAATTCTTGGATTAACTGAAGACTAACTACTGCGAAAGCATTTGCCAAGGACGTTT	Eukaryota;Opisthokonta;Fungi;Ascomycota;Saccharomycotina;Saccharomycetales;Pichia;Pichia_membranifaciens;	0.942313	0	0	0	0	0	0	0	0	0	0	0	0	0	0	0	0	0	0	0	0	0	0	0	0	0	0	0	0	0	0	0	0	0	0	0	0	0	0	0	6	0	2325	0	0	0	0
26c62f4fcb502b7416e57a5c0c02640d	AGCTCCATCAGTGTATATTAACGTTGTTGCGGTTAAAAAGCTCGTAGTTGGATTTCGAAGTGCGAAGATCAAGACTCATCAAATTGGTGTAGTCCGATAATCGCCTTCTAGCTTTAGGTAATAGCCTCTCTTCCTTTACGGGTTGGGATGTGTTGTTCCTAATCTTTTACTTTGATAAAATCAGAGTGTTCAAAGCAGGCGTCACTTGCCTTGAATGTTGCCGCAAGGGATAATAGAATATGACTTCGGTCTTATTTTGTTGGTTTCTAGGGCTGAAGTAATGACTAATAGGGACAGTTGGGGGCGCTCGTATTGAATCGTCAGAGGTGAAATTCTAGGATTGATTCAAGACGAACTACTGCGAAAGCATTCGCCAAGGATGTTT	Eukaryota;Amoebozoa;Lobosa;Tubulinea;Echinamoebida;Vermamoebidae;Hartmannella;Hartmannella_abertawensis;	0.999476	0	0	0	0	0	0	0	0	0	0	0	0	0	0	0	0	0	0	0	0	10	0	0	0	0	0	0	0	0	0	0	0	0	0	0	0	0	0	0	0	0	0	0	0	0	0
270b340f45599285e3efee573b89f958	AGCTCCAATAGCGTATATTAAAGTTGTTGCAGTTAAAAAGCTCGTAGTTGGATTTGTGGCGTATGGTGTGTTCCGGGCACTTAGTGTCTGAGTAACCTGCCATTGCCATCCTTGGGTGGAACCTGTGTGGCATTAGGTTGTCGTGCAGGGGATGCCCATCTTTTACTGTGAAAAAATTAGAGTGTTCAAAGCAGGCTTATGCCGTTGAATATATTAGCATGGAATAATGAGATAGGACCTTGGTACTATTTTGTTGGTTTGCGCACCGAGGTAATGATTAATAGGGACAGTTGTGGGTATTCGTATTCCATTGTCAGAGGTGAAATTCTTGGATTTCTGGAAGACGAACTAATGCGAAAGCATTTACCAAGGATGTTTTCATTAATCAAGAACGAAAG	Eukaryota;Stramenopiles;Ochrophyta;Bacillariophyta;Bacillariophyta_X;Raphid-pennate	0.991495	0	0	0	0	1	0	0	0	0	0	0	0	0	0	0	0	0	0	0	0	0	0	0	0	0	0	0	0	0	0	0	0	0	0	0	0	0	0	0	0	0	0	0	0	0	0
27252ea5fdb3f0510aab563dbe44f84e	AGCTCCATCAGTGTATATTAACGTTGTTGCGGTTAAAAAGCTCGTAGTTGGATTTCGGAGCATGGGACTCAAGGCCAGTCAAATTGGCTGTGCCCGAGGAACATCTCCTAGCTTAGGGTAACAGCCTCGCTTCCTTTGCGGGTTGCGATGTGCAGTTCCCTATCATTTACTTTGATAAAATCAGAGTGTTCAAAGCAGGCGTGTTGCCTTGAATGTTGCCGCAAGGGATAATAGAATATGACTTCGGTCCTATTTTGTTGGTTTCTAGGGCTGAAGTAATGACTAATAGGGACAGTTGGGGGCGCTCGTATTGAGTTGTCAGAGGTGAAATTCTAGGATTTACTCAAGACGAACTACTGCGAAAGCATTCGCCAAGGATGTTT	Eukaryota;Amoebozoa;Lobosa;Tubulinea;Nolandida;Nolandellidae;Nolandella	0.999999	0	0	0	0	0	0	0	0	0	0	0	0	0	0	0	0	0	0	0	0	0	0	0	0	0	0	40	0	0	0	0	0	0	0	0	0	0	0	0	0	0	0	0	0	0	0
2745bd5bc89d610408184aba67a2c1ab	AGCTCCAATAGCGTATACTAAAGTTGTTGCAGTTAAAAGGCTCGTAGTCGAACCTATGGCTCTGTGAACCTGGCCCACCCTCTAGTAGGGCGCGTGCCGGTGTGCACGAGTCATTCTTCTGGAGAGCATTGCTGCCCTTGATTGGGTTGGTGATGCGATTCAGATCCTTTACTGTGAGTAAATCAAAGTGTTCAAAGCAGGCTTCAACGCTTGTATGGTTCAGCATGGAATAATAAGATAAGACTTGGGTTTTGTCTTGTTGGCTCGACGAACCAAAGTAATGATTGAAAGGGATAGTTGGGGGTGCTAGTATTCAATGGTCAGCGGTGAAATGCGAGGACCCATTGAAGACTCACTTATGCGAAAGCATTCACCAAGGATATCT	Eukaryota;Rhizaria;Cercozoa;Endomyxa;Vampyrellida;Vampyrellida_X;Thalassomyxa;Thalassomyxa_sp.;	0.963386	0	0	0	0	0	0	0	0	0	0	0	0	0	0	0	0	0	0	0	0	0	0	0	0	0	0	0	0	0	0	0	0	0	0	0	0	0	0	0	0	0	0	0	0	0	0
274e7760adb6b089ce0491e5740a989a	AGCTCCAATAGCGTATATTAAAGTTGTTGCAGTTAAAACGCTCGTAGTTGAATTTTTGTTGTACGAAACAGATTGGTTCATTGAACTTTAATTTGTTTCTCGCAACATTATTCTGGTATTGCTATAACTTCACCGTTATAGTAGTGTCAGATTTGTTACTTTGAATAAACTAGAGTGTTTCAAGCAGGCTTTATGCCTTGAATACTTCAGCATGGAATAATAAGTTAGGACTCAGGTTCTTCTTGTTGGTTCAAGAGCCAGAGTAATGATTAATAGGGACAGTTAGGGGCATTCGTATTTGGAAGCTAGAGGTGAAATTCTTGGATTTTCCAAAGACGAACTACTGCGAAAGCATCTGCCAGGGATGTTT	Eukaryota;Alveolata;Apicomplexa;Gregarinomorphea;Neogregarinorida;Actinocephalidae	1	0	0	0	0	0	0	0	0	0	0	0	0	0	0	0	0	0	0	0	0	0	0	0	0	0	0	0	0	0	0	0	0	0	0	0	0	0	0	0	0	5	0	0	0	0	0
2753b69c9789d547450608faf29bbfc1	AGCTCCAGAAGCGTATATTAAAGTTGTTGCAGTTAAAAAGCTCGTAGTTGAATGTCTGGTATTTTGGCCGTGTGGGTCCGTGGGTTTTCTTTGTTTTTACGAAGAGGCTCGTTTGTGTATCCGCATTTTGTGCCTGCCATTTGTCTGAGGAGTTGTGAAAATGATTCCACAGGTTGTTTACTTTGAAAAAATTAGAGTGTTTAAAGCGGGACGTTTGATATGTCCATTGAATACATTAGCATGGAATAATGAGATAGGACTCTGGGCTTATTTTGTTGGTTTCTGAGCGTGGAGTAATGATTGATAGGGACGGTTGGGGGTGCTAGTATTCAAGGGCCAGAGGTGAAATTCTTGGATTCGTTGAAGACTAACTAATGCGAAAGCATTCACCAAGGACGT…	Eukaryota;Rhizaria;Cercozoa	0.968292	0	0	0	0	0	0	3	0	0	0	0	0	0	59	0	139	0	0	0	0	0	0	0	0	0	0	0	73	0	0	0	0	0	0	0	55	0	0	0	0	0	0	0	0	0	0
2758288096c9825716da8b54adf3e0a6	AGCTCCAATAGCGTATACTAAAGTTGTTGCAGTTAAAAAGCTCGTAGTTGAATTTCTGGTCTCGGACATCGGTCTGCCTCGAACGAGGTACGTACCAGTTGTCTGAATCCATCCTCGGGGAAAACGTATCTGTCATTCAGTTGATGGGTACGGGATCCTCGTCATTTACTGTGAGCAAAATAGAGTGTTCAAAGCAGGCTTATGCCGTTGAATACATTAGCATGGAATAATAAGATAAGACCTTGGTCTATTTTGTTGGTTTGTACTCCAAGGTAATGATTAATAGGGATAGTTGGGGGTATTCGTATTCAATTGTCAGAGGTGAAATTCTTGGATTTATGGAAGACGAACTACTGCGAAAGCATTTACCAAGGATGTTT	Eukaryota;Stramenopiles;Ochrophyta;Chrysophyceae;Chrysophyceae_X;Chrysophyceae_Clade-C	0.998947	0	0	0	0	0	0	0	0	0	0	0	0	0	0	0	0	0	0	0	0	0	0	0	0	0	0	0	0	0	0	0	0	0	0	0	0	310	28	29	0	0	0	0	0	0	0
2772b2b844c8e44a9712294ae3451d72	AGCTCCAATAGCGTATATTAAAGTTGTTGCAGTTAAAAAGCTCGTAGTTGGATTTGTGGCGGTTCCTGTGGTCCGATTTCGGTACTTTCGGGGACTGCCATCCTTGGGTGGATCCTGTGTGGCATTAGGTTGTCGTGCAGGGGATGCCCATCGTTTACTGTGAAAAAATTAGAGTGTTCAAAGCAGGCTTATGCCGTTGAATATATTAGCATGGAATAATGAGATAGGACCTTGGTACTATTTTGTTGGTTTGCGCACCGAGGTAATGATTAATAGGGACAGTTGTGGGTATTCGTATTCCATTGTCAGAGGTGAAATTCTTGGATTTCTGGAAGACGAACTAATGCGAAAGCATTTACCAAGGATGTTT	Eukaryota;Stramenopiles;Ochrophyta;Bacillariophyta;Bacillariophyta_X;Raphid-pennate;Amphora;Amphora_coffeaeformis;	0.761701	0	0	0	0	0	0	0	0	0	0	0	0	0	0	0	0	0	0	0	0	0	0	0	0	0	0	0	31	0	0	0	0	0	0	0	0	0	0	0	0	0	0	0	0	0	0
27bce2bb58ee57083b233b3445e6d86b	AGCTCCAATAGCGTATATTAAAGTTGTTGCAGTTAAAAAGCTCGTAGTTGGATTTCTGTGAGAGTGCCGGGGTCGGCTGATGCTTGTACACTGGCGCTCTTACATCCTTCTGTTAACCGTTCTTGGCATTCGTTTGCTGGTTCGGGGCTCAGATATTTTACCTTGAGAAAATTAGAGTGTTTCAGGCAGGCTTATGCCGGAATACATTAGCATGGAATAATGGAATAGGACCTGTGCGTCTTTCGGGGCGCCGGTCTCCGTTGTTGGTTTCGGGGACTAATGTAATGATTAATAGGGATAGTTGGGGGCATTAGTATTTAATAGTCAGAGGTGAAATTCTCGGATTTGTTAAAGACTAACTTATGCGAAAGCATTTGCCAAGGATGTTT	Eukaryota;Alveolata;Ciliophora;Spirotrichea;Hypotrichia;Holostichidae;Holosticha	0.999998	0	0	0	0	0	0	0	0	0	0	0	0	0	0	0	0	0	0	0	0	0	0	0	0	0	0	0	0	0	0	0	15	0	0	0	0	0	0	0	0	0	0	0	0	0	0
27c3036a02736aa7bf62ff648f6be52d	AGCTCCAATAGCGTATATTAAAGTTGTTGCAGTTAAAAAGCTCGTAGTTGGATTTGTGGCTGTCACGTGCGGCCTGGCACTCAGTGCCAGCGCTTTGCTAGTGTCGCCATCCTTGGGTGGAACCTGTGTGGCATTAGGTTGTCGTGCAGGGGATGCCCATCTTTTACTGTGAAAAAATTAGAGTGTTCAAAGCAGGCTTATGCCGTTGAATATATTAGCATGGAATAATGAGATAGGACCTTGGTACTATTTTGTTGGTTTGCGCACCGAGGTAATGATTAATAGGGACAGTTGTGGGTATTCGTATTCCATTGTCAGAGGTGAAATTCTTGGATTTCTGGAAGACGAACTAATGCGAAAGCATTTACCAAGGATGTTTTCATCAATCAAGAACGAAAG	Eukaryota;Stramenopiles;Ochrophyta;Bacillariophyta;Bacillariophyta_X;Raphid-pennate;Achnanthes;Achnanthes_sp.;	0.946064	0	0	0	0	0	0	0	0	0	0	0	0	0	0	0	0	0	0	0	0	0	0	0	1	0	0	0	0	0	0	0	0	0	0	0	0	0	0	0	0	0	0	0	0	0	0
27d747df7a43638264599c54e5c09b25	AGCTCCAATAGCGTATACTAAAGTTGTTGCAGTTAAAAAGCTCGTAGTTGAACCTCTGGTAGGGCCGACCTTGGCGCGCGGTGAATGCCGCGCTGCTTGAAAGCGTCGTCGCCCGGCCATCCTCCCCCGGTCTTTTGGGCTGGGGGTCGTTTACTGTAAAAAAAATAGAGTGTTCCAAGCAGGGGGTAATATCCCGGTATATAGTAGTATGGAATAATGAGATAGGACTTTGGTACTATTTTGTTGGTTTGCATGCCAAGGTAATGATTAAGAGGGACAGTTGGGGGTATTCGTATTTAGATGTCAGAGGTGAAATTCTTGGATTTTCGAAAGACGAACTACTGCGAAAGCATTTACCAAGGATGTTT	Eukaryota;Stramenopiles;Sagenista;Labyrinthulomycetes;Thraustochytriales;Thraustochytriaceae;Thraustochytrium;Thraustochytrium_aureum;	0.999999	0	0	0	0	0	0	0	0	0	0	0	0	0	0	0	0	0	0	0	0	0	0	0	0	0	0	0	0	37	0	0	0	0	28	0	30	64	0	1368	279	0	1956	0	0	0	0
27e7dfaf266497aa8c586046f4564f42	AGCTCCAATAGCGTATATTAAAGTTGTTGCGGTTAAAAAGCTCGTAGTTGGATTTCTGCTGAGGACAACCGGTCAGCCTTCTGGGCATGCACTCGGCTTGGCTTTGGCATCTTTCTGGGTAACGCTACTGCACTTGACTGTGTGGTGCGGGGTCCAGAACTTTTACTTTGAGGAAATTAGAGTGTTTCAAGCAGGCGCATGCCTTGAATACATTAGCATGGAATAATAAGACAGGACTTCGGTTCTATTTTGTTGGTTTCTAGAGCTGAGGTAATGATTGATAGGGATAATCGGGGGCGCTCGTATTTAACTGTCAGAGGTGAAATTCTTGGATTTGTTAAAGACGGACGACTGCGAAAGCATTTGCCAAGGATGTTT	Eukaryota;Alveolata;Dinoflagellata;Dinophyceae	0.999758	0	0	0	0	0	0	0	0	0	0	0	0	0	0	0	0	0	0	0	0	0	0	0	0	0	0	0	0	10	0	0	0	0	0	0	0	0	0	0	0	0	0	0	0	0	0
27ed9b5b778d1511046f1e39bbf7c1b6	AGCTCCAGAAGCATATGCTAAAGTTGTTGCAGTTAAAAAGCTCGTAGTTGAATTTCTGGTAGAATTAACGAACCCTTTTTAAGTAAATTCTTAAATTGTTGTGTTTTTTTTGTTTAATTTAGCCATTTATTTTTTTTCTTTTTGAAAAAGAATCATTTACTGTAAAAAAAATGGAGTGTTCAAAGCAAATTGTAATAATTTGAACAAATAGTATGGAATAATAAAAAAGGACAATTGTTCTATTTTGTTTGGTTTGTAAACAATTGTAATGATGAATAGGGACAGTTGGGGGTATTTGTATTTATAAGCTAGAGGTGAAATTCTTGGATTTTGTAAAGACAAACTACTGCGAAAGCATTTACCATGGATGTTT	Eukaryota;Stramenopiles;Sagenista;Labyrinthulomycetes;Thraustochytriales;Thraustochytriaceae;Thraustochytriaceae_X;Thraustochytriaceae_X_sp.;	0.992806	12	24	8	20	11	11	0	14	13	6	19	12	47	1948	32	6893	23	587	27	43	0	0	0	0	33	0	0	0	0	0	0	0	0	0	0	22	0	0	0	0	0	0	0	14	0	0
2814b1efea4bd4921528893a5e1594fa	AGCTCCAATAGCGTATATTAATGTTGTTGCAGTTAAAAAGCTCGTAGTTGAATTTAGGAGGGTTAACCTTCCTGTCTGCACTCCTCATGGCAACTGATATTGCTATGTGGAACAGACTTTTACTGTGAGAAAACTAAAGTGCTCAAAGCAGGCTAACGCTTGAATATTAAAGCATGGAATAATAAAATAGGACTTAATTCTATTATTGGTCATTGGATTAAGTAATGATTAACAGAAACAGTTGGGGGCATTCGTATTTAATTGTCAGAGGTGGAATTCTTGGATTAATTAAAGACGAACTAGTGCGAAGGCATTTGCCAAGGATGTTT	Eukaryota;Alveolata;Ciliophora;Phyllopharyngea;Suctoria;Ephelotidae;Ephelota;Ephelota_gigantea;	0.968293	0	0	0	0	0	0	0	0	0	0	0	0	0	0	0	0	0	0	0	0	0	0	0	0	0	0	0	0	0	0	0	0	0	0	0	0	0	0	0	0	0	0	0	0	0	0
2845c9eca8895d87bccc01afb78f19d3	AGCTCCAATAGCGTATATTAAAGTTGTTGCCGTTAAAAAGCTCGTAGTCGAACTTCGGCCTTTGCCGCCCGGTCCGCCTAATTGGGTGTGTACTGGAGCGGTGGAGGCTTACCTCGTGGTGAACGGTCATGTCCTTTACTGGGTGTGGTCGGGAACCATGACTTTTACTGTGAAAAAATTAGAGTGTTCAAAGCAGGCTTACGCCCGAATACATTAGCATGGAATAATAAAATAGGACGTGCGGTCCTATTTTGTTGGTTTCTAGGATCGCCGTAATGATTAATAGGGATAGTTGGGGGCATTCGTATTCAATTGTCAGAGGTGAAATTCTTGGATTTATTGAAGACGAACTACTGCGAAAGCATTTGCCAAGGATGTTT	Eukaryota;Opisthokonta;Fungi;Basidiomycota;Pucciniomycotina;Cystobasidiomycetes	0.999999	0	0	0	0	0	0	0	0	0	0	0	0	0	0	0	0	0	0	0	0	0	0	0	0	0	0	0	0	0	0	0	0	0	0	0	0	0	0	0	0	0	0	0	0	0	0
285de1ac5498a54e9c62fe593f0bb082	AGCTCCAATAGCGTATATTAAAGTTGTTGCAGTTAAAAAGCTCGTAGTTGGATTTCTGGTGGGAGTGACCGTTCCGGACTTGATTGTCTGTGTATTGAGTTGTCTCCAGCCATCCTTGTGGAGAACTTTTCTTGCATTAATTTGTAGGGATTGGGACCCACATCGTTTACTGTGAAAAAATTAGAGTGTTTAAAGCAGGCAATCGCTTGAATACATTAGCATGGAATAATAAGATAGGACTTTGGTACTATTTTGTTGGTTTGCATACCAAATTAATGATCAACAGGAACAGTTTGAGGATATTCGTATGAACATGTCAGAGGTGAAATTCTTGGATTTTGATCAGACGAACTACTGCGAAAGCATTTATCAAGGATGTTT	Eukaryota;Stramenopiles;Sagenista;Labyrinthulomycetes	1	0	0	0	0	0	0	0	0	0	0	0	0	0	0	0	0	0	0	0	0	0	0	0	0	0	0	0	0	0	0	0	0	0	0	0	0	285	63	2235	178	0	0	0	0	0	0
2908faa9d298c8a213c8d252d137e009	AGCTCCAGAAGCGTATGCTAACGTTGTTGCAGTTAAAAAGCTCGTAGTTGAAGGTTTGTCGGTTGGGTCTGTGGGGCGAATGTTCTGTAGATCGGCCTTTTTCTTTCCTGGCTCTTTCTTTTGAGGGGGCCTCGTTCACTGTAAACAAATTGGAGTGCTCCACGCAGGTCGTTGGGACCTGGACAATTGTTATGGGATGATGAGATAGGGCTCGGGCACTATTTTGTCGGTTTGCATGCCTGGGTAATGGTGAATAGGAACAGTTGGGGATATTCGTATTTAGCGGTCAGAGGTGAAATTCTTGGATTCGGGAAAGACGAACAACTGCGAAGGCATTTATCAAAGATGTTT	Eukaryota;Stramenopiles;Sagenista;Labyrinthulomycetes;Thraustochytriales;Thraustochytriaceae;Thraustochytriaceae_X;Thraustochytriaceae_X_sp.;	0.962984	0	0	0	0	0	0	0	0	0	0	0	0	0	0	0	13	0	0	0	0	0	0	0	0	0	0	0	0	0	0	0	53	0	0	0	0	0	0	0	0	0	0	0	0	0	0
291138ea210a78384646d6c4f6b84b24	AGCTCCAAAAGGATATATCAACGTTGTTGCAGTTAAAAAGCTCGTAGTTGAATTTCGGGTGGGAATGATGTTGCGCTTTTAGAGGATGTAAATCCACTTGAAGTGTGGCCGCCCGCCCTATTGTGGACTATATATTTTGTTTGCTAGTTAACTCTAGTAGATGAGATACCACTCTGTCACTGAGAGCAAATTGGAGTGCTCAAAGCAGGCTTGATAGCTTTGAACATTTTAGCTTGGAATGACAAGATATGACTTTTGTTTTATTTTGTTGGTTATGAAATAAAAGTAATGATTAACAGGAACAGCGCGGAGGTATCCGTATTGAAAGGTCAGAGGTGAAATTCTTGGATTCCTTCAAGACGAACAACTGCGAAAGCATTTACCAAGGATGTTT	Eukaryota;Stramenopiles;Sagenista;Labyrinthulomycetes;Thraustochytriales;Thraustochytriaceae;Thraustochytriaceae_X;Thraustochytriaceae_X_sp.;	0.993769	0	0	0	0	0	0	0	0	0	0	99	19	0	0	0	0	0	0	0	0	0	0	0	0	0	0	0	0	0	0	0	0	0	0	0	0	0	0	0	0	0	0	0	0	0	0
2932935ad2517ee57f18dda88363c64c	AGCTCCAATAGCGTATATTAATGTTGCTGCAGTTAAAAAGCTCGTAGTTCATTTTCTGGCCTGTCAAACTCGAACTGCACCTTTTACAGGAGCATGTCTCGAATCGTTTGCGGGCCATCCTTCTGGAGAGTGCTTCTTCTCTTGATTGAGTGGTTGTACAATTCAGATCGTTTACTGTGAGCAAATGGGAGTGTTCAAAGCAGGCTTTCTGTTTGAACCGTTTAGCATGGAATAATAAAATTGAACTTCGGTTTTATTTTGTTGGCTTCAAAAACCCAAGTTATGATCGATAGGGATGGTTGGGGGTGCTCGTATTCAGGGGGGAGCGGTGAAATGCAATGAGCCTCTGAAGACGGACTAATGCGAAAGCATTCACCAAGGACATCT	Eukaryota;Rhizaria;Cercozoa;Endomyxa;Vampyrellida;Penardia-lineage;Penardia-lineage_X;Penardia-lineage_X_sp.;	1	0	0	0	0	0	0	0	0	0	0	0	0	0	0	0	0	0	0	0	0	0	0	0	0	0	0	0	0	0	0	0	0	0	0	0	0	0	0	0	0	0	0	0	0	0	0
293757234bb8bf7ce95087ed89a45202	AGCTCCAGTAGCGTATATTAAAGTTGTTGCAGTTAAAAAGCTCGTAGTTGGATTTCTGGCGTGGTGCGCCCGGCCCGCCGCCGCTAAGGCGGCGAGTGCCGGCGCGCGCCTGCCATCCTTCTGGAGAGTGTGCCTGCCCTTCACTGGGTTGGGCACGCGATCTAGATCGTTTACTTTGAAAAAATTAGAGTGTTTAAAGCAGGCTTACGCTTCTGAATACATTAGCATGGAATAATAAGATAGGACTTTGGTTCTATTTTGTTGGTTTCTAGAACTAAAGTAATGATTGATAGGGACAGTTGGGGGTGCTAGTATTTAACGGCCAGAGGTGAAATTCTTGGATTCGTTAAAGACTAACTAATGCGAAAGCATTCACCAAGGATGTCT	Eukaryota;Rhizaria;Cercozoa;Filosa-Granofilosea;Filosa-Granofilosea_X;Massiteriidae;Massiteriidae_X;Massiteriidae_X_sp.;	0.999761	0	0	0	0	0	0	0	0	0	0	0	54	0	0	0	0	0	0	0	0	13	0	0	54	17	64	11	0	19	0	0	0	87	0	12	0	0	15	0	13	19	0	65	416	0	6155
294924463b85126daf065f49bba47738	AACCCCAAGAGTGTATCTTAATTTTGCTGCAGTTAAAAAGCTCGTAGTTGAATTTCTGATTGGTGAGACCCTCCGGGCGTCTCGCCTTTCATCCGCTTGGAGAAATAGTAGTCAGGTCAAACTGATTATTACAGACCCAGCATTTTACTTTGAAGAAATTAGAGTGTTCCTGGCAGGCCTAGCTGCATATATTAGCATGGGATAATGGAAAAAGACTTGTCTTGTTTTTTTGGTTAACAGATAAGTAATGATTAAAAGGGACAGTCGGGGGCATTCGTACTGAGTGGTCAGAGGTGAAATTCTTAGATTCGCTCAAGACGAACTAATGCGAAAGCATTTGCCAAGGATGTTTTCATTAATCAAGAACGAAAG	Eukaryota;Alveolata;Ciliophora;Phyllopharyngea;Cyrtophoria_4;Chilodonellidae;Trithigmostoma	0.907887	0	0	0	0	0	0	0	0	0	0	0	0	0	0	0	0	0	0	0	0	0	0	0	0	252	0	0	0	0	58	0	0	0	0	0	0	0	0	0	0	0	0	0	0	0	0
2954e54c7416a5af65cc92fdaa370d26	AGCTCCAGTAGCGTATATTAAAGTTGTTGCAGTTAAAAAGCTCGTAGTTGGATTTCTGGCGTGTGTCGACGGGTCCGCCGCCCATTGGGCGTGTTGAGTACCTCGTTGATGCTGCCATTTGTTGTTTGTGCGCGTGTAAAAGCGTCGTGCGGACGACCGTTTACTTTGAGAAAATTAGAGTGTTTAAAGCGGGCTTATTGACAGCCGTTGAATATATTAGCATGGAATAATGAGATAGGACTCGTGTCCGATTTTGTTGGTTTTGATGACAAGAGTAATGATTGATAGGGACAGTTGGGGGTGCTAGTATTTGACGGCCAGAGGTGAAATTCTTGGATTCGTGAAAGACTAACTAATGCGAAAGCATTCACCAAGGATGTCT	Eukaryota;Rhizaria;Cercozoa	0.977633	0	0	0	0	0	0	0	0	0	0	0	7	13	23	0	93	0	0	31	685	0	0	0	0	0	0	0	9	0	0	0	0	0	0	0	0	0	0	0	0	0	0	0	0	0	0
29590d24db73f9103683ee01dbe32d2f	AGCTCCAATAGGATATATCAAAGTTGTTGCAGTTGAAAAGCTCGTAGTCGTATTTTTGATGGGTTGATGTCTCTTGTTCACTTGACGCAAGTCCTGTGTCTCGGGGCCGCCTGTCATTTTGTGGGCTCAAGTGGCCAGGCTGCGGTTCATTTCGTGACCTGGTCGCTCCACTCCGTCACTGAGAGCAAATTGGAGTGCTCAAAGCAGGCTTTACAGCTTTGAACATTTTAGCTTGGAATGACAAAGTATGACCATTTGTTCACTTTGTTGGTTATGAACGGGAGGTAATGATAAATAGGAACAGTTGCGGGGGTACTCGTACTGGAAAGTCAGAGGTGAAATTCTTGGATTTTTCCACGACGAACGACTGCGAAAGCATTTATCAAGGATGTTT	Eukaryota;Stramenopiles;Sagenista;Labyrinthulomycetes;Thraustochytriales;Thraustochytriaceae;Amphifilidae;Amphifilidae_sp.;	0.942993	0	0	0	0	0	0	0	0	0	0	0	0	0	0	0	0	0	0	0	0	10	0	0	0	0	0	0	0	0	0	0	0	0	0	0	0	0	0	0	0	0	0	0	0	0	0
29939ff6fb23fa2452ff70c1178ca069	AGCTCCAATAGTGTATATTAAAGTTGTTGTGATTAAAACGCTCGTAGTTGAATTAAGAGCTGATGTTCAAAGTTAATCAGAAGTGCTAGCCATTTGTGGTTAATTTTGGGAACAATGTCAAAGAAGGAGTTTAGTCAAGATATGACTAAAGATTACTTTGAAAAAAATAAAGTGTTTAAAGCAAAACATACGTTAATGAATAATGAAGCATGGGACAATAAGAAGGGGATGAGGAATCATTTCGAGAGAAGGATTAAAAGGAATAATTGGGGTGATTCAGAAAAAAACGGGAGAGGTGAAAATTCATGATCGTTTTAAGATGCACGAGAGCGAAAGCATTTCACTCAATTATAT	Eukaryota;Amoebozoa;Conosa;Archamoebea;Archamoebea_X;Entamoebidae;Entamoeba;Entamoeba_terrapinae;	1	0	0	0	0	0	0	0	0	0	0	0	0	0	0	0	0	9	11	0	3	0	0	0	0	0	0	0	0	0	0	0	0	0	0	0	0	0	0	0	0	0	0	0	0	0	0
2a13ca4cabed1fd34216dd96e01ae561	AGCTCCAATAGCGTATATTAAAGTTGTTGCAGTTAAAAAGCTCGTAGTTGGACTTGTGGCGTTGTTGTCGGTCCAATTTTGGTACTGTTGGCAACGCCATCCTTGGGTGGATCCTGTGTGGCATTAGGTTGTCGTGCAGGGGATGCCCATCGTTTACTGTGAAAAAATTAGAGTGTTCAAAGCAGGCTTACGCCGTTGAATATATTAGCATGGAATAATGAGATAGGACCTTGGTACTATTTTGTTGGTTTGCGCACCAAGGTAATGATTAATAGGGACAGTTGTGGGTATTCGTATTCCATTGTCAGAGGTGAAATTCTTGGATTTCTGGAAGACGCACGAATGCGAAAGCATTTACCAAGGATGTTT	Eukaryota;Stramenopiles;Ochrophyta;Bacillariophyta;Bacillariophyta_X;Raphid-pennate;Amphora	0.731381	0	0	0	0	0	23	0	0	0	0	0	0	0	0	280	0	0	0	10	20	0	0	0	0	0	0	0	0	0	0	0	0	0	0	0	0	0	0	0	0	0	0	0	0	0	0
2a867f945e484e900ff0da61fc95bcc1	AGCTCCAATAGCGTATATTAAAGTTGTTGCAGTTAAAAAGCTCGTAGTTGGATTTGTGGTGTACTTCGGCGGCCCGTCACTATGTGATGGAGCTTGCTGAAGTCGCCATCCTTGGGTGGATCCTGTGTGGCATTAAGTTGTCGTGCAGGGGATGCCCATCGTTTACTGTGAAAAAATTAGAGTGTTCAAAGCAGGCTTATGCCGTTGAATATATTAGCATGGAATAATGAGATAGGACTTTGTTGCTATTTTGTTGGTTTGCGCGAGAAGGTAATGATTAATAGGGACAGTTGGGGGTATTCGTATTCCATTGTCAGAGGTGAAATTCTTGGATTTCTGGAAGACGAACTACTGCGAAAGCATTTACCAAGGATGTTT	Eukaryota;Stramenopiles;Ochrophyta;Bacillariophyta;Bacillariophyta_X;Raphid-pennate	0.99738	0	0	0	1	0	0	0	0	0	0	0	0	0	0	0	0	0	0	0	0	0	0	0	0	0	0	0	0	0	0	0	0	0	0	0	0	0	0	0	0	0	0	0	0	0	0
2a8dade33bc506480d34369b487faa40	AGCTCCAATAGCGTATATTAAAGTTGTTGCAGTTAAAAAGCTCGTAGTTGGATTTGTGGCGTACGGTGGGTCCCAGGCACTTGTTGTCTGAGCGTCCTGGCGTTGCCATCCTTGGGTGGAACCTGCGTGGCATTAGGTTGTCGTGCAGGGGATGCCCATCGTTTACTGTGAAAAAATTAGAGTGTTCAAAGCAGGCTTATGCCGTTGAATATATTAGCATGGAATAATAAGATAGGTCTAGGGTCCTATTTTGTTGGTTTGCGGTCCTTAGAAATGATTAACAGGGACAGTTGGGGGTATTCGTATTCCATTGTCAGAGGTGAAATTCTTGGATTTCTGGAAGACGAACTACTGCGAAAGCATTTACCAAGGATGTTT	Eukaryota;Stramenopiles;Ochrophyta;Bacillariophyta;Bacillariophyta_X;Raphid-pennate;Navicula;Navicula_sp.;	0.7597	0	0	0	0	0	0	0	0	0	0	0	0	0	0	0	0	0	0	0	0	0	0	1	0	0	0	0	28	0	0	0	0	0	1	0	0	0	0	0	0	0	0	0	0	0	0
2a96cca632fbffb29dbc3eb8496b5e8a	AGCTCCAATAGCGTATATTAAAGTTGTTGCAGTTAAAAAGCTCGTAGTTGGATTTGTGGCGTTCGCGTGCGTCCCGGCACTCGTGCCGGTGTTTGCTAGCGTCGCCATCCTTGGGTGGAACCTGTGTGGCATTGAGTTGTCGTGCAGGGGATGCCCATCGTTTACTGTGAAAAAATTAGAGTGTTCAAAGCAGGCTTACGCCGTTGAATATATTAGCATGGAATAATAAGATAGGACCTTGGTACTATTTTGTTGGTTTGCGCACCAAGGTAATGATTAATAGGGACAGTTGGGGGTATTCGTATTCCATTGTCAGAGGTGAAATTCTTGGATTTTTGGAAGACGAACTACTGCGAAAGCATTTACCAAGGATGTTT	Eukaryota;Stramenopiles;Ochrophyta;Bacillariophyta;Bacillariophyta_X;Raphid-pennate;Nitzschia;Nitzschia_communis;	0.746891	75	248	85	8897	86	7029	132	3625	77	3109	80	47	103	94	119	97	113	145	433	8634	31	34	25	56	34	0	37	10615	43	19	24	32	13	61	51	31	27	29	48	52	34	56	35	0	41	60
2accb825e7bf6cba7710b756f6e8bb9d	AGCTCCAATAGCATATACTAAAGTTGTTGCAGTTAAAAAGCTCGTAGTTGAAGTTCTGGCTGTTCGATCCTCGTGCTTTGTAGCCGAGGAATCGACAGTCATCCGCTTGCAATTATATGTTCTCCTTTAACCGGGAGGCTATATGAGTAAGCATTTTACCTTGAGAAAAACAGAGTGTTCCAGGCAGGTATGTCCGGAATGCGTTAGCATGGAATAATAGAATATGACTGAAGTCGATTTATTGGTTTGAGGCTTTAGTAATGATTAATAGGAACAGTCGGGGGCATTGGTACTTGACAGTCAGAGGTGAAATTCTAGGATTTGTCAAAGACTAACAAATGCGAAAGCATTTGCCAAGGATGTTT	Eukaryota;Alveolata;Ciliophora;Oligohymenophorea;Peritrichia_2;Sessilida	1	0	0	0	0	0	0	0	0	0	0	0	0	0	0	0	0	0	0	0	0	0	0	0	0	0	0	0	0	0	0	0	0	0	0	0	10	0	0	0	0	0	0	0	0	0	0
2add2e41e8584a0dfbbfbee3a7514a97	AGCTCCAATAGCGTATATTAATGTTGTTGCAGTTAAAAAGCTCGTAGTTGGATTTCTGCGCCGCGCAGCTCGGTCCGCCGCACTGCGGTGCGACTGCGGCTGGAGCGTCGCATCCTTGTGGGGACTGTTGTTTGCCATTAATTTGGTGACTTCAGGAACCGCATCGTTTACTGTGAAAAAATTAGAGTGTTCAAAGCAGGCTTATGCCGTGAATACATTAGCATGGAATAATAAGATAGGACTTTGGTTCTATTTTGTTGGTTGGAGGCCAAGGTAATGATTAATAGGGACAGTTGGGGGTATTCATATTTAATTGTCAGAGGTGAAATTCTTGGATTTATGAAAGATGAACTTATGCGAAAGCATTTACCAAGGATGTTT	Eukaryota;Stramenopiles;Opalozoa;MAST-3;MAST-3J;MAST-3J_X;MAST-3J_XX;MAST-3J_XX_sp.;	1	0	0	0	0	0	0	0	0	0	0	7	10	0	0	0	0	0	0	0	0	0	0	0	0	0	0	0	0	0	0	0	0	0	0	0	0	0	0	0	0	0	0	0	0	0	0
2b287cf3f025282d19d8647874f618f0	AGCTCCAATAGCGTATATTAAAGTTGTTGCAGTTAAAAAGCTCGTAGTTGGATTTGTGGTGCGTGTCGAGGCGTCCGATTGTTCGGTTCTGCCTTGGCCGCGCCATCCTTGGGTGGAATCTGTGTGGCATTAGGTTGTCGTGCAGGGGATGCCCATCGTTTACTGTGAAAAAATTAGAGTGTTCAAAGCAGGCTTATGCCGTTGAATATATTAGCATGGAATAATAAGATAGGTCTAGGGTCCTATTTTGTTGGTTTGCGGGCCTTAGAAATGATTAACAGGGACAGTTGGGGGTATTCGTATTCCATTGTCAGAGGTGAAATTCTTGGATTTCTGGAAGACGAACTACTGCGAAAGCATTTACCAAGGATGTTT	Eukaryota;Stramenopiles;Ochrophyta;Bacillariophyta;Bacillariophyta_X;Raphid-pennate;Fistulifera;Fistulifera_saprophila;	0.899414	0	0	0	0	0	0	0	0	0	0	0	0	0	0	0	0	0	0	0	0	0	0	0	0	0	0	0	86	0	0	0	0	0	0	0	0	0	0	0	0	0	0	0	0	0	0
2b389f521e54ac4801407e425a71c675	AGCTCCAATAGCGTATATTAAAGTTGTTGCAGTTAAAAAGCTCGTAGTTGAACTTCTGTACGTGCTCTGTTCTGGCTCCGGTCAAGCAGCTGCGCGTGCATCCGCTTGCAAACTAGTCTCGTCCTTAACTGGTCGTTCTAGGGAGTAAGCCCTTTACTTTGAAAAAATTAGAGTGTTTCAGGCAGGCAATGGCTCGAATACATTAGCATGGAATAATGGAATAGGACTTTTGTCCATTTGGTTGGTTATTGGACTTAAGTAATGATTAACAGGGACAGTTGGGGGCATTAGTATTTAATTGTCAGAGGTGAAATTCTTGGATTTATTAAAGACTAACTTATGCGAAAGCATTTGCCAAGGATGTTT	Eukaryota;Alveolata;Ciliophora;Oligohymenophorea;Scuticociliatia_1;Cohnilembidae;Cohnilembus;Cohnilembus_verminus;	0.999202	0	0	0	0	0	0	0	0	0	0	0	0	0	0	0	0	0	0	0	0	91	0	0	0	0	0	1728	0	0	0	0	0	11	0	0	0	0	0	0	7	0	0	0	0	0	26
2b59efa56247ac9fd187deef4d420c7a	AGCTCCAATAGCGTATATTAAAGTTGTTGCAGTTAAAAAGCTCGTAGTTGGATTTGTGGCGTTCGCGTGCGACCTGGCATTCGTGCCGGTGTTTGCTAGCGTCGCCATCCTTGGGTGGAACCTGTGTGGCATTAGGTTGTCGTGCAGGGGATGCCCATCGTTTACTGTGAAAAAATTAGAGTGTTCAAAGCAGGCTTATGCCGTTGAATATATTAGCATGGAATAATAAGATAGGACTTTGGTACTATTTTGTTGGTTTGCGCACCAAAGTAATGATTAATAGGGACAGTTGGGGGTATTCGTATTCCGTTGTCAGAGGTGAAATTCTTGGATTTACGGAAGACGAACTACTGCGAAAGCATTTACCAAGGATGTTT	Eukaryota;Stramenopiles;Ochrophyta;Bacillariophyta;Bacillariophyta_X;Raphid-pennate;Nitzschia	0.921306	0	0	0	1	0	0	0	0	0	0	0	0	0	0	0	0	0	0	0	0	0	0	0	0	0	0	0	0	0	0	0	0	0	0	0	0	0	0	0	0	0	0	0	0	0	0
2b5f359204ac40a74284b2a2f690503f	AGCTCCAATAGCGTATATTAAAGTTGTTGTGGTTAAAAAGCTCGTAGTTGAACCTTGGGCCTGGCTGGCCGGTCCGCCTCACCGCGTGTACTGGTCCGGCCGGGCCTTTCCCTCTGTGGAACCCCATGCCCTTCACTGGGCGTGGCGGGGAAACAGGACTTTTACTGTGAAAAAATTAGAGTGCTCCAGGCAGGCCTATGCTCGAATACATTAGCATGGAATAATAGAATAGGACGTGTGGTTCTATTTTGTTGGTTTCTAGGACCGCCGTAATGATTAATAGGGACAGTCGGGGGCATCAGTATTCAATTGTCAGAGGTGAAATTCTTGGATTTATTGAAGACTAACTACTGCGAAAGCATTTGCCAAGGATGTTT	Eukaryota;Opisthokonta;Fungi;Ascomycota;Pezizomycotina;Sordariomycetes	0.999991	0	0	0	0	0	0	0	0	0	0	42	0	0	0	0	0	0	0	0	0	0	0	0	0	0	0	0	0	0	0	0	39	0	0	0	0	0	0	0	0	0	0	0	0	0	0
2bd8bbdaf985c8e61d069e3755b4733f	AGCTCCAATAGCGTATATTAAAGTTGTTGCAGTTAAAAAGCTCGTAGTTGGATTTGTGGTGGTCCCTGCGGTCCAGTCTTGGTACTGTCGGGGGCTGCCATCCTTGGGTGGATCCTGTGTGGCATTAGGTTGTCGTGCAGGGGATGCCCATCGTTTACTGTGAAAAAATTAGAGTGTTCAAAGCAGGCTTATGCCGTTGAATATATTAGCATGGAATAATGAGATAGGACTTTGGTACTATTTTGTTGGTTTGCGCACCGAGGTAATGATTAATAGGGACAGTTGTGGGTATTCGTATTCCATTGTCAGAGGTGAAATTCTTGGATTTCTGGAAGACGAACGAATGCGAAAGCATTTACCAAGGATGTTT	Eukaryota;Stramenopiles;Ochrophyta;Bacillariophyta;Bacillariophyta_X;Raphid-pennate;Amphora;Amphora_coffeaeformis;	0.996874	0	0	0	0	0	0	0	0	0	0	0	0	0	0	0	0	0	0	0	0	0	0	0	0	0	0	0	39	0	0	0	0	0	0	0	0	0	0	0	0	0	0	0	0	0	0
2bfb9bd59b55c335c7145b84d8ba073b	AGCTCCAGAAGCGTATGCTAATGTTGTTGCAGTTAAAAAGCTCGTAGTTGAATTTCTGGTGTGTCTGACCGAGCCTTTGGGCGTACGCTCACGGTTTTGCTCGTTTGTCGGACTGGCCATCTTAGATGTCTGTCAAGGGCATCTTCATTCACTGTAAAGAAAGCAGAGTGTTCAAAGCAGGTTGTAAAATCTGAATGTTTATTATGGGATGATGAGATAGGGCTCGCGCGCTATTTTGTTGGTTTGCACGCGCAAGTAATGGTGGATGGGAACAGTTGGGGCTATTCGTATTTGGCAGCTAGAGGTGAAATTCTTGGATCTGCAAAAGACGAACCAAGGCGAAGGCATTTAGCAAAGATGTTT	Eukaryota;Stramenopiles;Sagenista;Labyrinthulomycetes;Thraustochytriales;Thraustochytriaceae	0.999439	0	0	0	0	0	0	0	0	0	0	0	0	0	0	0	0	0	0	0	0	0	0	0	0	0	0	0	0	0	0	0	43	0	0	0	0	0	0	0	0	0	0	0	0	0	0
2c2d7901bbe23bba2465f4c49129a7cf	AGCTCCAGAAGCGTATGCTAACGTTGTTGCAGTTAAAAAGCTCGTAGTTGAAGGTTTGTCGGTTGGGTCTGTGGGGCGAATGCTTCGCGGGCCGGCCTTTTTTCTTCTTGGCTCTCTCTTTGGGGGGGCCTCGTTCACTGTAAACAAATTGGAGTGCTCCACGCAGGTCGTTGGGACCTGGACAATTGTTATGGGATGATGAGATAGGGCTCGGGCACTATTTTGTCGGTTTGCATGCCTGGGTAATGGTGAATAGGAACAGTTGGGGATATTCGTATTTAGCGGTCAGAGGTGAAATTCTTGGATTCGGGAAAGACGAACAACTGCGAAGGCATTTATCAAAGATGTTT	Eukaryota;Stramenopiles;Sagenista;Labyrinthulomycetes;Thraustochytriales;Thraustochytriaceae;Thraustochytriaceae_X;Thraustochytriaceae_X_sp.;	0.983053	0	0	0	0	0	0	0	0	0	0	0	0	0	0	0	0	0	0	0	0	0	0	0	0	0	0	0	0	0	0	0	28	0	0	0	0	0	0	0	0	0	0	0	0	0	0
2c4f2d49b70f0880e3289ab1659295e9	AGCTCCAAGAGTGTATATTAAAGTTGTTGCGGTTAAAAAGCTCGTAGTTGGACCATGGGTCGGAGAGCGAGGTCCCCGGGGGCGTCAGCCTTTGGGATGAAGGCCTCGTCCTTCCTTCCTTTTTTGCAAAACGTCAAACGCCGGCAACGGTGGTTTTACAGGGTTTACTTTGAATAAATTAGGGTGTTCAAAGCAGGCGTATCGCCTTGAATACATTAGCATGGGATAATAAAAGATGACCTTCGGTTTATACTTTATTGGTTTCTGAAGCCGAGGTAATGATTGATAGGGACGGTTGGGGTCGCTCGTATTCAGTGGTCAGAGGTGAAATTCTAGGACCCACCGAGGACAAACAAGTGCGAAGGCATTCGACAAGGATGTTT	Eukaryota;Amoebozoa;Lobosa;Tubulinea;Euamoebida;Hartmannellidae;Copromyxa;Copromyxa_sp.;	0.971445	0	0	0	0	0	0	0	0	0	0	0	0	0	0	0	0	0	0	0	0	0	0	0	0	0	0	0	0	0	8	0	0	0	0	0	0	0	0	0	0	0	0	0	0	0	0
2c70fa97a332d86ee2357e20531422b9	AGCTCCAATAGCGTATATTAAAGTTGTTGCAGTTAAAAAGCTCGTAGTTGGATTTCTGTGAGAGTGTCTTCGTCGGCTGATGCTTGTGCGCAGAGGCTCTTACATCCTTCTGTTAACTGTTCTTGGCATTCTATTGCTGGTTCAGGGCTCAGATATTTTACCTTGAGAAAATTAGAGTGTTTCAGGCAGGCTTATGTCCGGAATACATTAGCATGGAATAATAGAATAGGACCCGTGCGTCTCTCGGGGCGCCGGTCTCTGTTGTTGGTTTCGGGGACTAAAGTAATGATTAATAGGGATAGTTGGGGGCATTAGTATTTAATAGTCAGAGGTGAAATTCTCGGATTTGTTAAAGACTAACTTATGCGAAAGCATTTGCCAAGGATGTTT	Eukaryota;Alveolata;Ciliophora;Spirotrichea;Hypotrichia;Holostichidae;Holosticha	0.999669	56	0	91	0	0	0	0	0	14	7	8	0	0	0	0	0	0	0	0	0	0	0	0	0	0	0	0	0	0	0	0	0	0	0	0	0	0	0	0	0	0	0	0	0	0	0
2c93592dc7dd0cf3813d7a2124552e18	AGCTCCAATAGCGTATATTAAAGTTGTTGCAGTTAAAAAGCTCGTAGTCTGAGTCTTGGCCGGCATTGAGCGTCCGTGGCCTTCACGGTCATGTGCATGCGATATGGCGGCCATTGTACTTCGGAGGAACACGGGTTACTTTTCATTAAGTGCTCGTGGGATTCCGATAGTTTACTTTGAGAAAAATAGAGTGTTCAAAGCAGGCGATTTTGCCTTGAATACATTAGCATGGGATAATGGAATAGGACATTGGTTCTATTTTGATGGTTTACGGACCGATGTAATGATTAATAGGGACAGTTGGGGACATTCATATTCCATGGCTAGAGGTGAAATTCTTGGATTCATGGAAGATGAACTACTGCGAAAGCATTTGTCAAAGATGTTT	Eukaryota;Hacrobia;Centroheliozoa;Centroheliozoa_X;Centroheliozoa_XX;Centroheliozoa_XXX;Centroheliozoa_XXXX;Centroheliozoa_XXXX_sp.;	0.740189	0	0	0	0	0	0	0	0	0	0	0	0	0	0	0	0	0	0	0	0	0	0	0	0	0	0	0	0	0	0	0	0	0	0	0	0	28	0	768	96	0	0	0	0	0	0
2ca84ece119d20b7d28e78abd3bd6bee	AGCTCCAATAGTGTATTTTAATGTTGTTGCTGTTAAAAAGCTCGTAGTTGAATTTCTGGTTTCTCGGCCTATCTTCGGAGAAGTCGGGAGATCATCCACCCTGAAAGCTCGTATGCCGAATAAGCTGCGTGTCGAAGGGGTAGTTTACTTTGAAGAAATTAGAGTGTTCCAGGCAAGCAAATGCTTGAATATTACAGCATGGAATAATGGAATAGGACTGTCCATTGGTTGGATCAGTAATGATAAACAGAGACAATTGGGGGTACTAGTATTACATGGTTTAGCGGTAAAATGTGTTGACCCATGTAGGACTAACTAAAGCGAAGGCATTTGCCAAGAGTGTTT	Eukaryota;Alveolata;Ciliophora;Phyllopharyngea;Cyrtophoria_7;Hartmannulidae;Hartmannula;Hartmannula_sinica;	0.782645	0	0	0	0	0	0	0	0	0	0	0	0	0	0	0	0	0	0	0	0	0	0	0	5	0	0	0	0	0	0	0	0	0	0	0	0	0	0	0	0	0	0	0	0	0	0
2ca92e3165f39a3cb4af7864b485c2c0	AGCTCCAGAAGCGTATGCTAACGTTGTTGCAGTTAAAAAGCTCGTAGTTGAAGGTTTGTCGGTTGGGTCTGTGGGGCGAATGCTCCGCAGATCGGCCTTTTTCTTTCCTGGCTCTCTCTTTGGGGGGGCCTCGTTCACTGTAAACAAATTGGAGTGCTCCACGCAGGTCGTTGGGACCTGGACAATTGTTATGGGATGATGAGATAGGGCTCGGGCACTATTTTGTCGGTTTGCATGCCTGGGTAATGGTGAATAGGAACAGTTGGGGATATTCGTATTTAGCGGTCAGAGGTGAAATTCTTGGATTCGGGAAAGACGAACAACTGCGAAGGCATTTATCAAAGATGTTT	Eukaryota;Stramenopiles;Sagenista;Labyrinthulomycetes;Thraustochytriales;Thraustochytriaceae;Thraustochytriaceae_X;Thraustochytriaceae_X_sp.;	0.937541	0	0	0	0	0	0	0	0	0	110	0	0	0	0	0	90	0	0	0	0	0	0	0	0	0	0	0	0	0	0	0	0	0	0	0	0	0	0	0	0	0	0	0	0	0	0
2cd09254a60f08fa1452132096bbe965	AGCTCCAATAGCGTATACTAAAGTTGTTGCAGTTAAAAAGCTCGTAGTTGAATTTCTGGTCGTGGCGACCGGTCCGCCCCTCACGGGGTGTGCACCTGGTCTCTGCGTCCATCCTCGGGGAGAGCGCGTCTGGCATTCAGTTGTCGGGCGCGGGATCCTCGTCATTTACTGTGAGCAAAATAGAGTGTTCAAAGCAGGCTTAGGCCGTTGAATACATTAGCATGGAATAATAAGATAGGACCTTGGTCTATTTTGTTGGTTTGCATTCCAAGGTAATGATTAATAGGGATAGTTGGGGGTATTCGTATTCAATTGTCAGAGGTGAAATTCTTGGATTTATGGAAGACGAACTACTGCGAAAGCATTTACCAAGGATGTTT	Eukaryota;Stramenopiles;Ochrophyta;Chrysophyceae;Chrysophyceae_X;Chrysophyceae_Clade-F;Paraphysomonas;Paraphysomonas_imperforata;	0.998896	0	0	0	0	0	0	0	0	0	0	23	0	0	0	0	0	0	0	0	0	40	0	0	0	0	0	759	0	0	0	0	0	22	0	0	0	0	0	0	0	0	0	0	0	0	17
2ce918069803190b41aafdc74ee61374	AGCTCCACTAGTGTATCTTAACGTTGTTGCAGTTAAAAAGCTCGTAGTTGAATTTCTGTGTAGCCACCTCGTCCTCGGACAAGGTTGGCTATTCATCCGCGTTAGAAGCTAACCCGACATTAATTTGTCAGTTAGGGAAAGACGCATTTTACTTTGAAGAAATTAGAGTGTTCCAAGCAAGCATTGCATGAATATTACAGCATGGAATAATGGAATAGGACAGAGTCAATTTTATTGGTTATTCGACTTTGTAATGATTAACAGGGACAGTTGGGGGCATTCGTATTCAGTTGTCAGAGGTGAAATTCAGAGATTAACTGAAGACGAACTAATGCGAAAGCATTTGCCAAGGATGTTT	Eukaryota;Alveolata;Ciliophora;Phyllopharyngea;Chonotrichia;Isochonopsidae;Isochona;Isochona_sp.;	0.999977	0	0	0	0	0	0	0	0	0	0	0	0	0	0	0	0	0	0	0	0	0	0	0	0	0	0	0	0	0	0	0	0	0	0	0	0	0	0	0	0	0	0	0	0	12	0
2d0e0f71ac569e13014cad55333f9039	AGCTCCAATAGCGTATATTAAAGTTGTTGCAGTTAAAAAGCTCGTAGTTGGATTTCTGGTGGGAGTGACCGTTCCGGACTTGATTGTCTGCGTATTGAGTTTTCTCCAGCCATCCTTGTGGAGAACTTTTCTTGCATTAATTTGTAGGGATTGGGACCCACATCGTTTACTGTGAAAAAATTAGAGTGTTTAAAGCAGGCAATCGCTTGAATACATTAGCATGGAATAATAAGATAGGACTTTGGTACTATTTTGTTGGTTTGCATACCAAATTAATGATCAACAGGAACAGTTTGAGGATATTCGTATGAACATGTCAGAGGTGAAATTCTTGGATTTTGATCAGACGAACTACTGCGAAAGCATTTATCAAGGATGTTT	Eukaryota;Stramenopiles;Sagenista;Labyrinthulomycetes;Thraustochytriales;Thraustochytriaceae;Labyrinthuloides;Labyrinthuloides_minuta;	0.971334	0	0	0	0	0	0	0	0	0	0	0	0	0	0	0	0	0	0	0	0	0	0	0	0	0	0	0	0	0	0	0	0	0	0	0	0	0	0	285	0	0	0	0	0	0	0
2d420b293cb6f40d4391b715ee802c83	AGCTCCAATAGCGTATATTAAAGTTGTTGCAGTTAAAAAGCTCGTAGTTGGATTTCTGTGAGAGTGCCGGTGTCGGCTGATGCTTGTACGCAGGCGCTCTTACATCCTTCTGTTAACTGTTCTTGGCATTTTATTGCTGGTTCAGGGCTCAGATATTTTACCTTGAGAAAATTAGAGTGTTTCAGGCAGGCTTATGCCGGAATACATTAGCATGGAATAATGGAACAGGACCTGTGCGTCTCTCGGGGCGCCGGTCTCCGTTGTTGGTTTCGGGGACTAATGTAATGATTAATAGGGATAGTTGGGGGCATTAGTATTTAATAGTCAGAGGTGAAATTCTCGGATTTGTTAAAGACTAACTTATGCGAAAGCATTTGCCAAGGATGTTT	Eukaryota;Alveolata;Ciliophora;Spirotrichea;Hypotrichia;Holostichidae;Holosticha;Holosticha_diademata;	0.991759	0	0	0	0	0	0	0	0	24	0	0	0	0	0	0	0	0	0	0	0	0	0	0	0	0	0	0	0	0	0	0	0	0	59	0	0	0	0	0	0	0	0	0	0	0	39
2d74dd93481c5acea4e7bb8a367a999e	AGCTCCAGAAGCATATGCTAAAGTTGTTGCAGTTAAAAAGCTCGTAGTTGAATTTCTGGTAGAATTAACGAACCCTTTTTAAGTAAATTCTTAAATTGTTGTGTTTTTCTTGTTTAATTTAGCCATTTATTTTTTTTCTTTTTGAAAAAGAATCATTTACTGTAAAAAAAATGGAGTGTTCAAAGCAAATTGTAATAATTTGAACAAATAGTATGGAATAATAAAAAAGGACAATTGTTCTATTTTGTTTGGTTTGTAAACAATTGTAATGATGAATAGGGACAGTTGGGGGTATTTGTATTTATAAGCTAGAGGTGAAATTCTTGGATTTTGTAAAGACAAACTACTGCGAAAG	Eukaryota;Stramenopiles;Sagenista;Labyrinthulomycetes;Thraustochytriales;Thraustochytriaceae;Thraustochytriaceae_X;Thraustochytriaceae_X_sp.;	0.991276	0	0	0	0	0	0	0	0	0	0	0	0	0	0	0	1	0	0	0	0	0	0	0	0	0	0	0	0	0	0	0	0	0	0	0	0	0	0	0	0	0	0	0	0	0	0
2d933bfbbce251c283b592f3b1d62db8	AGCTCCAATAGCGTATATTAAAGTTGTTGCAGTTAAAAAGCTCGTAGTTGAATTTGTGGTGGTTAGTATGGTCCATTTTGGTGCTAATGCTGACTACCATCCTTGGGTCGAACGTGTGTGGCATTAGGTTGTCGTGCATGGGATGCTCATCGTTTACTGTGAGAAAATTAGAGTGTTCAAAGCAGGCTTATGCCGTTGAATATATTAGCATGGAATAATGAGATAGGACCTCTGGTTCAATTTTGTTGGTTTGCGTGCGGGGGTAATGATTAATAGGGACAGTTGGGGGTATTCGTATTCCAATGTCAGAGGTGAAATTCTTGGATTTTTGGAAGACGAACTACTGCGAAAGCATTTACCAAGGATGTTT	Eukaryota;Stramenopiles;Ochrophyta;Bacillariophyta;Bacillariophyta_X;Raphid-pennate	0.761521	0	0	0	0	0	0	0	0	0	0	0	0	0	0	0	0	0	0	0	0	0	0	0	0	0	0	0	0	0	0	0	0	0	0	0	0	0	0	0	0	0	0	0	0	0	0
2de5fd0219262ea89ac86d8392be55f3	AGCTCCACTAGTGTATCTTAACGTTGTTGCAGTTAAAAAGCTCGTAGTTGAATTTCTGTTTAGCCTCCTCGTCTTCGGATAAGGCTGGCTATTCATCCGCGTTCGAAGCTAGCCCGACATTAATTTGTCAGTTAGGGGAAGACGCATTTTACTTTGAAGAAATTAGAGTGTTCCAAGCAAGCATTGCATGAATATTACAGCATGGAATAATGGAATAGGACAGAGTCAATTTTATTGGTTATTCGACTTTGTAATGATTAACAGGGACAGTTGGGGGCATTCGTATTCAGTTGTCAGAGGTGAAATTCAGAGATTAACTGAAGACGAACTAATGCGAAAGCATTTGCCAAGGATGTTT	Eukaryota;Alveolata;Ciliophora;Phyllopharyngea;Chonotrichia;Isochonopsidae;Isochona;Isochona_sp.;	0.999946	0	0	0	0	0	0	0	0	0	0	0	0	0	0	0	0	0	0	0	0	41	0	0	0	0	0	0	0	0	0	0	0	0	0	0	0	0	0	0	0	0	0	0	0	0	0
2dece07c5a74ba86b681c95ac2cc2545	AGCTCCAATAGCGTATATTAATGTTGTTGCAGTTAAAAAGCTCGTAGTTGACTTTAGGAGGGTTAACCTTCCTGTCTGCACTCCTCATGGCAACTGATATTGCTATGTGGAACAGACTTTTACTGTGAGAAAACTAAAGTGCTCAAAGCAGGCTAACGCTTGAATATTAAAGCATGGAATAATAAAATAGGACTTAATTCTATTATTGGTCATTGGATTAAGTAATGATTAACAGAAACAGTTGGGGGCATTCGTATTTAATTGTCAGAGGTGGAATTCTTGGATTAATTAAAGACGAACTAGTGCGAAAGCATTTGCCAAGGATGTTT	Eukaryota;Alveolata;Ciliophora;Phyllopharyngea;Suctoria;Ephelotidae;Ephelota;Ephelota_gigantea;	0.966411	0	0	0	0	0	0	0	0	0	0	0	0	0	0	0	0	0	0	0	0	0	0	0	0	0	0	0	0	0	0	0	0	0	0	0	0	0	0	0	0	0	0	0	0	0	0
2e224e542df645c87db8758d7502b110	AGCTCCAATAGCGTATATTAAAGTTGTTGCAGTTAAAAAGCTCGTAGTTGAACTTCTGTACAGTCTCATTTCTGGCTTAGGTCAAGATGTTGGCTGTGCATCCGCTTGCAAAGCTGGTTCGGCCTTAACTGGTCGGCTAGTAGAGTAAGCCCTTTACTTTGAAAAAATTAGAGTGTTTCAGGCAGGCAATGGCTCGAATACATTAGCATGGAATAATGGAATAGGACTTTTGTCCATTTGGTTGGTTATTGGACTTAAGTAATGATTAAAAGGGACAGTTGGGGGCATTGGTATTTAACAGTCAGAGGTGAAATTCTTGGATTTGTTAAAGACTAACTTATGCGAAAGCATTTGCCAAGGATGTTTTCATTAATCAAG	Eukaryota;Alveolata;Ciliophora;Oligohymenophorea;Scuticociliatia_1;Philasterida;Uronema;Uronema_marinum;	0.999995	0	0	0	0	0	0	16	0	0	0	0	0	0	0	0	0	0	0	0	0	0	0	0	0	0	0	0	0	0	0	0	0	0	0	0	0	0	0	0	0	0	0	0	0	0	0
2e35ca5b9d91acf36e15f8728feabe36	AGCTCTAATAGCGTATATTAAAGTTGTTGCAGTTAAAAAGCTCGTAGTTGAAATTCCGGCGATCTCGCCTGTCTGGGATTCCATGGATCATGAAAGTGTTTTATGGCTAGACCAGACTTTACTGTGAACAAAATAAAGTGCTCAAAGCAGGCAATAGCTTGAATAATCTAGCATGGAATAATACAATATGACTTTATTCATTTTATTGGTCATTGGATGAAGTAATGATTAACAGGAACAGTTGGGGGCATTCGTATTTAATAGTCAGAGGTGAAATTCATAGATTTATTAAAGACGAACTAATGCGAAAGCATTTGCCAAGGATGTTT	Eukaryota;Alveolata;Ciliophora;Phyllopharyngea;Suctoria;Endogenida_2;Endogenida_2_X;Endogenida_2_X_sp.;	0.990364	0	0	0	0	0	0	0	0	0	0	0	0	0	0	0	0	0	0	0	0	0	0	0	0	0	0	0	0	0	0	0	0	0	0	0	0	0	0	0	0	0	0	0	0	0	0
2e3c9cc9f08cc01bae38976c49d38114	AGCTCCAATAGCGTATATTAAAGTTGTTGCAGTTAAAAAGCTCGTAGTTGAACTTCAGACCTGGCCGGGCGGTCTGCCTAACGGTATGTACTGTCTGGCTGGGTCTTACCTCTTGGTGAGCCGGCATGCCCTTCACTGGGTGTGTCGGGGAACCAGGACTTTTACCTTGAGAAAATTAGAGTGTTCAAAGCAGGCCTATGCCTGAATACATTAGCATGGAATAATAAAATAGGACGTGCGGTTCTATTTTGTTGGTTTCTAGAGTCGCCGTAATGATTAATAGGGATAGTTGGGGGCATTAGTATTCAGTTGCTAGAGGTGAAATTCTTGGATTTACTGAAGACTAACTACTGCGAAAGCATTTGCCAAGGATGTTT	Eukaryota;Opisthokonta;Fungi;Basidiomycota;Agaricomycotina;Agaricomycetes;Ganoderma	0.750535	0	0	0	0	0	0	0	0	0	0	0	0	0	0	0	0	0	0	0	0	0	0	13	0	0	0	0	0	0	0	0	0	0	0	0	0	0	0	0	0	0	0	0	0	0	0
2e8a61a03b651b5d816b2aacde9155ef	AGCTCCAATAGCGTATATTAAAGTTGTTGCTGTTAAAAAGCTCGTAGTTGAACTTCTGTATATGCCCAGTTCTGGCTTCGGTCAAGCTGTGGTGTATGCATTCGCTTGCAAACCTAGTCCGGCCTTCACTGGTCGACTAGAGGAGTAGGCTTTTTACTGTGAAAAAATTAGAGTGTTTCAAGCAAGCAATGGCCTGAATACATTAGCATGGAATAATGGAATAGGACTTTTGTCCATTTGGTTGGTTATTGGACATGAGTAATGATTAACAGGGACAGTTGGGAGCATTAGTACTTAATTGTCAGAGGTGAAATTCTTGGATTTATTAAAGACTAACTTATGCGAAAGCATTTGCTAAGGATGTTT	Eukaryota;Alveolata;Ciliophora;Oligohymenophorea;Scuticociliatia_1;Philasterida	0.993992	0	0	0	0	0	0	0	0	0	0	0	0	0	0	0	0	0	0	0	0	52	0	0	0	0	0	0	0	0	0	0	0	0	0	0	0	0	0	0	0	0	0	0	0	0	0
2edb4a58f2d32171426e635a4d9bda20	AGCTCTAATAGCGTATATTAAAGTTGTTGCAGTTAAAAAGCTCGTAGTCGAATCTTGGGGTCGGGCAGGCTATCGGCCTAGTGTCGGATGGTCAACTCGGCTCTTTCTTTCTGGGGACTGCGTCCCTTTAATTAGGGGCGTATGGACGCAGATCGTTTACTTTGAAAAAATTAGAGTGTTCAAAGCAAGCCATCGCTTGAATACATTAGCATGGAATAATGGAATAGGACTGCGGTTCTATTTTGTTGGTTTCTAGGACCGAAGTAATGATTAATAGGGACAGTTGGGGCCGTTTATATTCCGTTGTCAGAGGTGAAATTCTTGGATTTACGGAAGATAAACTTCTGCGAAAGCATTCGGCAAGGATGTTT	Eukaryota;Hacrobia;Cryptophyta;Cryptophyceae;Goniomonadales;Goniomonadales_X;Goniomonas;Goniomonas_amphinema;	0.999948	0	0	0	0	0	0	0	0	0	0	0	0	0	0	0	0	0	0	0	0	0	0	0	0	0	0	0	0	0	0	0	0	0	0	0	0	0	0	0	0	0	0	0	0	0	0
2eec14cea7f3be96378e84904edfe85e	AGCTCCACTAGCGTATACCAATTTTGCTGCAGTTGAAAAGCTCGTAGTCGGATTTGTGCGGTGAGTCGTCGGTTCCGAACAGTGTTCGGAGACCAGATGACCTCACTGCATCCTCGGGTGGAACCTGTGTGGCATTAAGTTATCGTGCAGGGGATGCCCGTCTTTTACTGTGAATAAATTAGAGTGTTCAAAGCAGGCTTACGCCGTTGAATATGCTAGCATGGAATAATGAGATAGGACTTCGGTACTATTTTGTTGGTTTGCGCACCGAAGTAATGATTAATAGGGACAGTTGGGGGCATTCGTATTCCATTGTCAGAGGTGAAATTCTTGGATTTTTGGAAGACGAACTACTGCGAAAGCATTTGCCAAGGATGTTT	Eukaryota;Stramenopiles;Ochrophyta;Bacillariophyta;Bacillariophyta_X;Araphid-pennate;Hyalosira;Hyalosira_delicatula;	0.996974	0	0	0	0	0	0	0	0	0	0	0	0	0	0	0	0	0	0	0	0	0	0	0	0	0	0	0	0	0	0	0	0	0	0	0	0	0	0	0	0	0	0	0	0	0	0
2efb303815dcbe63f8def61866bf5025	AGCTCCAATAGCGTATATTAAAGTTGTTGCAGTTAAAAAGCTCGTAGTTGAATTTCTGGGCGGCCCGCCGGTCCTCCTCTGGTTGTACTGGGCGGCGCCGGCCATGCTTGTGGAGAGGGCTCGCATTGAGTTGCGTGCCGGATCTGCATCATTTACTGTGAAAAAATTAGAGTGTTTAAAGCAGGCTGTCGCTTGAATACATTAGCATGGAATAATAAGATAGGACTTTGGTCTATTTTGTTGGTTGCGAACCGAGGTAATGATTAATAGGGATAGTTGGGGGTATTCATATTTAATTGTCAGAGGTGAAATTCTTGGATTTATGAAAGATGAACAACTGCGAAAGCATTTACCAAGGATGTTT	Eukaryota;Stramenopiles;Opalozoa;Bicoecea;Bicoecales;Bicoecaceae;Bicoecaceae_X;Bicoecaceae_X_sp.;	0.841762	0	0	0	0	0	0	0	0	0	0	0	0	0	0	0	0	0	0	0	0	0	0	0	0	0	0	0	0	0	0	0	0	2	0	0	0	0	0	0	0	0	0	0	0	0	0
2efc0b3cb390799377c6c1c69a80c0de	AGCTCCAATAGCGTATATTAATGTTGTTGCAGTTAAAAAGCTCGTAGTTGAATTTAGGAGGGTTAACCTTCCTGTCTGCACTCCTCATGGCAACTGATATTGCTATGTGGAACAGGCTTTTACTGTGAGAAAACTAAAGTGCTCAAAGCAGGCTAACGCTTGAATATTAAAGCATGGAATAATAAAATAGGACTTAATTCTATTATTGGTCATTGGATTAAGTAATGATTAACAGAAACAGTTGGGGGCATTCGTATTTAATTGTCAGAGGTGGAATTCTTGGATTAATTAAAGACGAACTAGTGCGAAAGCATTTGCCAAGGATGTTT	Eukaryota;Alveolata;Ciliophora;Phyllopharyngea;Suctoria;Ephelotidae;Ephelota;Ephelota_gigantea;	0.959536	0	0	0	0	0	0	0	0	0	0	0	0	0	0	0	0	0	0	0	0	0	0	0	0	0	0	0	0	0	0	0	0	0	0	0	0	0	0	0	0	0	0	0	0	0	0
2f25183eb26cbcaad806e6fbae353d29	AGCTCCAATAGCGTATATTAAAGTTGTTGCGGTTAAAAAGCTCGTAGTTGGATTTCTGCATGGAAGGAGCGGTCCACCCATTGGGCGAGTTACTGCTACCTTTGGTGCATCTTTCTGAGGACGTGTTCTTCACTTAATTGTGAGGGCGCAGGACTCAGAACATTTACTTTGAGGAAATGAGAGTGTTTCAAGCAGGCAAATGCCTTGAATACGTTAGCATGGAATAATAGCATCGGACCATCGTCCAGCTGTTGGTGTCTGGGCGAAGGTAAAGGTGAATAGGGATTGTTGGGGGCATTCGTATTTAACTATCAGAGGTGAAATTCTTGGATTTGTTGAAGACGGACCACTGCGAAAGCATCTGCCAAAGATGTTC	Eukaryota;Alveolata;Dinoflagellata;Syndiniales;Dino-Group-I;Dino-Group-I-Clade-5;Dino-Group-I-Clade-5_X;Dino-Group-I-Clade-5_X_sp.;	1	0	0	0	0	0	0	0	0	0	0	0	0	0	0	0	0	0	0	0	0	0	0	0	0	0	0	0	0	0	0	0	17	0	0	0	0	0	0	0	0	0	0	0	0	0	0
2f2e18e434541288a587da6275204e48	AGCTCCAATAGCGTATATTAAAGTTGTTGCAGTTAAAAAGCTCGTAGTTGGATTTGTGGCTTTCGCTGTGGCGTCCATTAGTTTGGTTCTGCCGTGGCGTGGCCATCCTTGGGTGGATTTTGTGTGGCATTAGGTTGTCGTGCAGAGGATGCCCATCGTTTACTGTGAAAAAATTAGAGTGTTCAAAGCAGGCTTATGCCGTTGAATATATTAGCATGGAATAATAAGATAGGTCTTGGGTCCTATTTTGTTGGTTTGCGGGCCTTGGAAATGATTAATAGGGACAGTTGGGGGTATTCGTATTCCATTGTCAGAGGTGAAATTCTTGGATTTCTGGAAGACGAACTACTGCGAAAGCATTTACCAAGGATGTTT	Eukaryota;Stramenopiles;Ochrophyta;Bacillariophyta;Bacillariophyta_X;Raphid-pennate	0.99873	0	0	0	0	0	0	0	0	0	0	0	0	0	0	0	0	0	0	0	0	0	0	0	0	15	0	0	0	0	0	0	0	0	0	0	0	0	0	0	0	0	0	0	0	0	0
2f458ad38edc05701f2c0d92cf658ab6	AGCTCCAATAGCGTATATTAAAGTTGTTGCAGTTAAAAAGCTCGTAGTTGGATTTGTGGCTGTCACTAGCGGCCTATCACTTAGTGTTAGTGTTTGCTGGTGTCGCCATCCTTGGGTGGAGCCCGTGTGGCATTAGGTTGTCGTGCGGGGGATGCCCATCGTTTACTGTGAGAAAATTAGAGTGTTCAAAGCAGGCTTATGCCGTTGAATATGTTAGCATGGAATAATAAGATAGGACCTCGGTACTATTTTGTTGGTTTGCGCACCGAGGTAATGATTAATAGGGACAGTTGGGGGTATTCGTATTCCATTGTCAGAGGTGAAATTCTTGGATTTCTGGAAGACGAACTACTGCGAAAGCATTTACCAAGGATGTTT	Eukaryota;Stramenopiles;Ochrophyta;Bacillariophyta;Bacillariophyta_X;Raphid-pennate;Psammodictyon;Psammodictyon_sp.;	0.772781	0	0	0	0	0	0	0	0	0	0	0	0	0	0	0	0	0	0	0	0	0	0	0	0	0	0	0	0	0	0	0	0	0	0	0	0	0	0	0	0	0	0	0	0	0	0
2fd412ebaf7758dc8e2f6aec5b960ee9	AGCTCCAGTAGCGTATATTAAAGTTGTTGCAGTTAAAAAGCTCGTAGTTGGATTTGTGGTCTCCCGCGTGGCCCTCTCTGAGGCGCTGTTGCGGGGGTCCATCCTTGGGCGGATGTCGCGTGGCATTCGGTTGTCGCGTGGGGGATGCCCATCGTTTACTGTGAAAAAATCAGCGCGTTCAAAGCAGGCTTATGCCGTTGAATGTATTAGCATGGAATAATGAGATAGGACCACGGTGCTATTTTGTTGGTTTGCGCACTGGGGTAATGATTAATAGGGACAGTTGGGGGTATTCGTATTGCATTGTCAGAGGTGAAATTCTTGGATTTCTGCAAGACGAACTACTGCGAAAGCATTTACCAAGGATGTTT	Eukaryota;Stramenopiles;Ochrophyta;Bacillariophyta;Bacillariophyta_X;Raphid-pennate;Cocconeis	0.998908	0	0	0	0	0	0	0	0	0	0	0	0	0	0	0	0	9	0	0	0	0	0	0	0	0	0	0	0	0	0	0	0	0	0	0	0	0	0	0	0	0	0	0	0	0	0
2fe1cd9c9bdeb7951557930c42e53073	AGCTCCAATAGCGTACACTAAAGTTGTTGCAGTTAAAAAGCTCGTAGTCTAATGTATGGGAGTTGTGGGGTGGGTGTTTGGTTGGTTTTGCCGACTAGACAATACTCGCTCCGCTTCCCGCGTTTTCCCTTTTTGTAAAAGAAGGGATACTTCACTGTAAGTAAAACAACTCGCTCAACAGCAAGGTTATCTTGATATGAATTAGTATGGGATGATGAGATAGGCTCGGTCCGTATTTTGTTGGTTTTAGTGGTCTGAGAATGATGAAGAGGGACAATTGGGGGTATTCGTATTTACATGTCAGAGGTGGAATTCTTGGATTTTGGAAAGACGAACTAATGCGAAAGCATCTACCAAAGATGTTT	Eukaryota;Stramenopiles;Sagenista;Labyrinthulomycetes;Thraustochytriales;Thraustochytriaceae;Thraustochytrium;Thraustochytrium_kinnei;	1	0	0	0	0	0	0	0	0	0	0	0	0	0	0	0	0	0	0	0	0	0	0	0	0	0	0	36	0	0	0	0	0	0	0	0	0	0	0	0	0	0	0	0	0	0	0
2fec2704480d8c5980b3f2a32a0f0680	AGCTCCAATAGCGTATATTAAAGTTGTTGCAGTTAAAAAGCTCGTAGTTGAATTTCTGAGCTCGCCGAGCGGCGGTCTTTGGCCGACCACTCCGCAAGTTCATCCTCGCCCCTCGGGGCGTCATTTACTGTGAAAAAATTAGAGTGTTTAAAGCAGGCTTTAGGCTTGAATACATTAGCATGGAATAATGAGATAGGACCAAGTCGTATTTTGTTGGTTGCGCGATTCGGTAATGATTAATAGGGACAGTTGGGGGTATTCATATTTAATTGTCAGAGGTGAAATTCTTAGATTTATTAAAGATGAACTACTGCGAAAGCATTTACCAAGGATGTTT	Eukaryota;Stramenopiles;Opalozoa;Bicoecea;Anoecales;Cafeteriaceae;Cafeteria;Cafeteria_roenbergensis;	0.91581	0	0	0	2	0	0	0	0	0	0	0	0	0	0	0	0	9	0	8	41	75	32668	25624	102	85	71	245	66	68	36	54	40	57	81	63	91	2061	147	3380	3927	72	92	57	141	48	99
3031052a6f437cab9230c020b405a1f8	AGCTCCAGTAGTGTATATCAAAGTTGTTGCGGTTAAAAAGCTCGTAGTTGGATTTCCCGGGTATTTGGGTGTGGGATGTGGTCATTTGAACTGCGGCCATGGCTTTACCGGTGGTTGTGCCCTCCTTGTGGGAGGGTGTGACGTGTACTTTGAACAAATTAGAGTGCTCAAGACAGGCGATTTTTTATTGCTGTGAATAGATTAGCATGGAATACGGGTATAAACTCTCTTCTCGGGATTGTTGTTTTGACGAGGAGGGGGAATGATGGATAGGGACAGGTGTGGGCATTGAGATTGTTACGTCAGAGGTGAAATTCTTAGATCGTAGCAGGATTAGCAGACGCGAAAGCATTTGTCAAGGATGTTT	Eukaryota;Apusozoa;Apusomonadidae;Apusomonadidae_Group-2;Apusomonadidae_Group-2B;Apusomonadidae_Group-2B_X;Apusomonadidae_Group-2B_XX;Apusomonadidae_Group-2B_XX_sp.;	1	0	0	0	0	0	0	0	0	0	0	0	0	0	0	0	0	0	0	0	0	0	0	0	0	0	7	0	0	0	0	0	0	0	0	0	0	0	0	0	0	0	0	0	0	0	0
307a3af42655675adafee58fac393a52	AGCTCTGATAGCGTACACAAAAGTTGTTGCAGTTAAAAAGCTCGTAGTTGAAATTCGGAAGTAGATGAGTCGCTCCGGTGACCCGTCTGCTCCTTCACGCAAAGAAGCCGTCGTGCATTAACTTACATGGCGGTCGAGTTGCGTCGTTTACTGTGAACAAATTTGGGTGTTCAAAGCAGGCTCTGGCCTGAACTTTTTAGCATGGAATAATAAGATACGACTCCGGTCGCATTTTGTTGGTGGCAACCGAAGTAATGATTGACAGAAACAATTGTGGGTATTCGTATGAGCATGTCAGAGGTGAAATTCTTGGATTTTGGTCAGACGAACTACTGCGAAAGCATTTACCAAGGATGTTT	Eukaryota;Stramenopiles;Sagenista;Labyrinthulomycetes;Labyrinthulales;Labyrinthulaceae;Labyrinthulaceae_X;Labyrinthulaceae_X_sp.;	0.835891	0	0	0	0	0	0	0	0	0	0	0	0	0	0	0	0	0	0	0	54	0	0	0	0	0	0	0	0	0	0	0	0	0	0	0	0	0	0	0	0	0	0	0	0	0	0
308d933d69e7f0c165e9fd1b76de311d	AGCTCCAATAGCGTATATTAAAGTTGTTGCAGTTAAAAAGCTCGTAGTTGAAAATCTGGATGGCTGAACCCTTGACAAACGTCCTGGTTCATTCATCCATTCTCACAAAGATGTTCTTGTACATTAACTTGTGCATGAACGGAGTTGTGTCGTTTACTGTGAACAAATTAGGGTGTTTAAAGCAGGCCTACGTTTGTATACATTAGCATGGAATAATAAGATATGACTTTGGTTGTATTTTGTTGGTGACTACCAAAGTAATGATTGATAGGAACTGTTGTGGGTATTCGTATGAGCATGTCAGAGGTGAAATTCTTGGATTTTGATCAGACGAACTACTGCGAAAGCATTTACCAAGGATGTTT	Eukaryota;Stramenopiles;Sagenista;Labyrinthulomycetes;Labyrinthulales;Labyrinthulaceae;Labyrinthula;Labyrinthula_sp.;	0.999397	0	0	0	0	0	0	0	0	0	0	0	0	0	0	0	0	0	0	0	0	0	0	0	0	0	0	0	0	0	0	0	0	316	0	0	0	0	0	0	0	0	0	0	0	0	0
30a354c57f84477e5d96c7bf077994a5	AGCTCCAATAGCGTATATTAAAGTTGTTGCAGTTAAAAAGCTCGTAGTTGGATTTCTGGTAGGAGCGACCGTGCCGAACTTGATTGTTTGTGTATTGTGTTGTCTTCAGCCATCCTCGCGGAGAAGTTTTCCGGCATTAATTTGTCGGGATTGGGACCCGCGTCGTTTACTGTGAAAAAATTAGAGTGTTTAAAGCAGGCAATCGCTTGAATACATTAGCATGGAATAATAAGATAGGACTTTGGTACTATTTTGTTGGTTTGCATACCAAATTAATGATCAACAGGAACAGTTTGAGGATATTCGTATGAACATGTCAGAGGTGAAATTCTTGGATTTTGATCAGACGAACTACTGCGAAAGCATTTATCAAGGATGTTT	Eukaryota;Stramenopiles;Sagenista;Labyrinthulomycetes;Labyrinthulales;Labyrinthulaceae;Aplanochytrium;Aplanochytrium_sp.;	0.999662	0	0	0	0	0	0	0	0	0	0	0	0	0	0	0	0	0	0	0	0	0	0	0	0	0	62	0	0	0	0	0	0	0	0	0	0	0	0	0	0	0	0	33	0	0	0
30d7d1368eb981ed88069b26bfa9b61f	AGCTCCAATAGCGTATACTAAAGTTGTTGCAGTTAAAAAGCTCGTAGTTGAACTTCTGTACAGTCTCAGTTCTGGCTTAGGTCAAGCTGTTGGCTGTGCATCCGCTTGCAAAGCTAGTTCGGCCTTAACTGGTCGGCTGGTAGAGTAAGCCCTTTACTTTGAAAAAATTAGAGTGTTTCAGGCAGGCAATGGCTCGAATACATTAGCATGGAATAATGGAATAGGACTTTTGTCCATTTGGTTGGTTATTGGACATGAGTAATGATTAAAAGGGACAGTTGGGGGCATTGGTATTTAACAGTCAGAGGTGAAATTCTTGGATTTGTTAAAGACTAACTTATGCGAAAGCATTTGCCAAGGATGTTT	Eukaryota;Alveolata;Ciliophora;Oligohymenophorea;Scuticociliatia_1;Philasterida;Uronema;Uronema_marinum;	0.940367	0	20	0	22	15	26	0	25	0	0	2325	1754	22	0	0	31	33	0	0	38	58	0	0	0	0	0	0	0	0	0	0	0	0	0	0	0	0	0	0	0	0	0	0	0	0	28
31060c384089562fdedd151e509c143c	AGCTCCAATAGCGTATATTAAAGTTGTTGCAGTTAAAAAGCTCGTAGTTGAAATTCTAGTTGTATTGGGCTCCTGCACTCGATGTATGAGTACCAGCAGCTATCCGTCTGCAAATACATGTCCTTCCTTAACCGGTTGGCTGTATGAGTAGGCATTTTACCTTGAGAAAAACAGAGTGTTCCAGGCAGGTTTGTCCGGAATGCATTAGCATGGAATAATAGAACATGACTGAAGTCGATTTATTGGTTTGAGGCTTTAGTAATGATTAATAGGAACAGTCGGGGGCATTAGTACTTGTCAGCTAGAGGTGAAATTCCAGGATTTGACAAAGACTAACTGATGCGAAAGCGTTTGCCAAGGATGTTT	Eukaryota;Alveolata;Ciliophora;Oligohymenophorea;Peritrichia_2;Sessilida;Zoothamnium_1	0.985351	0	0	22	0	0	0	0	0	0	0	0	0	0	0	0	0	0	0	0	16	0	10	0	0	17	0	0	4180	12	0	0	7	0	22	0	0	0	0	21	14	13	11	0	7	8	13
3112b187fddad5d97482399cf4b0de64	AGCTCCAATAGCGTATATTAAAGTTGTTGCAGTTAAAAAGCTCGTAGTTGGATTTCTGATAGGGACTGCCGGTCCACGGCTTCTGGTCGTGTGTACTAGCGGGTTCTTGTCTTCCTTGTGGGGAACTTGTCTGGCATTGGTTTGTCGGGCTTGGGAGCCACATCATTTACTGTGAAAAAATTAGAGTGTTTAAAGCAGGCATATGCCTTGAATACATTAGCATGGAATAATAAGATAGGACTTTGGCCTATTTTGTTGGTTTGCAAGCCAGGGTAATGATTAATAGGGATAGTTGGGGGTATTCGTATTTAATTGTCAGAGGTGAAATTCTTGGATTTATGAAAGACGAACAACTGCGAAAGCATTTACCAAGGATGTTT	Eukaryota;Stramenopiles;Opalozoa;Bicoecea;Borokales;Borokaceae;Borokaceae_X;Borokaceae_X_sp.;	0.997785	0	0	0	0	0	0	0	0	0	0	0	0	0	0	0	0	0	0	0	0	0	0	0	0	0	0	0	0	0	0	0	0	0	0	0	0	0	0	0	0	0	0	0	0	0	0
31134565b559f9ca20c878df03d045d5	AGCTCCAATAGCATATGTTAAAGTTGTTGCGGTTGAAAAGCTCGTAGTTGGACTTCTGCTGAGGGTTGCTAACCCGCCCTCTGGGTGATGGTCTGGCCTGCCTCAGTATCTTCTCGGAGAATGTAGATGCACTTGACTGTGTGGTGCGCTATCTGAGGCTGTTACTTTGAGGAAATTAGAGTGCTTCAAGCAGGTCGTTGCCCTGAATACATTAGCATGGCATGATAAGTCAGAACCTCTTGTTCTTCTTTGTTGGTTTTAGAGCAGAGGGGAGGGTGAATAGGAACAGTTGGGGGTATTCATATTTGACTGTCAGAGGTGAAATTCTTGGATTTGTGAAAGATGGACTACTGCGAAAGCATCTGCCAGAGATGTCT	Eukaryota;Alveolata;Dinoflagellata;Dinophyceae;Peridiniales;Peridiniales_X;Bysmatrum;Bysmatrum_gregarium;	1	0	0	0	8	0	0	57	92	5	52	0	0	0	0	0	0	0	0	0	0	0	0	0	0	0	0	6	1402	0	0	0	0	0	0	0	0	0	0	0	0	0	0	0	0	0	0
31311ee0f1d86b0a42d3ae5ea5c1565c	AGCTCCAGTAGCGTATATTAAAGTTGTTGCAGTTAAAAGGCTCGTAGTCGAACTTATGGCCCTGTGAACCTGACCCACTCTCTAGTGGAGTGAGCGTCGGTGTGCACGGGTCATCTTTCTGGAGAGCACTTCTGCCCTTGATTGGGTTGGTTGTGTAATTCGGATCATTTACTGTGAGTAAATCAAAGTGTTCAAAGCAGGCTTTACAGCTTGAATGGTTCAGCATGGAATAATAAGATAGGACTTCGGTTCATACTTGTTGGCTATACGGACCAAAGTAATGATTGATAGGGATGGTTGGGGGTGCTAGTATTGGGCGGTCAGCGGTGAAATGCACGGACCCGTTCAAGACTAACTTATGCGAAAGCATTCACCAAGGACATCT	Eukaryota;Rhizaria;Cercozoa;Endomyxa;Vampyrellida;Vampyrellida_X	0.997435	0	0	0	0	0	0	0	0	0	0	0	0	0	0	0	0	0	0	0	0	0	0	0	0	0	0	0	0	0	0	0	0	0	0	0	0	0	0	0	0	0	0	0	0	0	0
314f0457f4de1b862f726e557507005e	AGCTCCAATAGCGTATATTAAAGTTGCTGCAGTTAAAAAGCTCGTAGTTGGATTTCTGGCGTTTCATTTCAGGCCGGCCACGGTTTCGTGTGTTAGTGCTTGAGATCTTCGCCATCCTTCCAATGGCTATTCATCCTTCTTCATTGAGGTGGTGAGTGGTATTGGATCTTTTACTTTGAAAAAATTAGAGTGTTTCAAGCAGGCTTTATGCTATGAATACATTAGCATGGAATAATAATTTAGGACTTCGGTTCTATTTTGTTGGTTTCTAGGACTGAAGTAATGATTGATAGGGATAGTTGGGGGTGCTAGTATTCAGCGGCCAGAGGTGAAATTCTCGGATTCGCTGAAGACTAACTTATGCGAAAGCATTCACCAAGGATGTCT	Eukaryota;Rhizaria;Cercozoa;Filosa-Sarcomonadea;Glissomonadida;Sandonidae;Neoheteromita;Neoheteromita_sp.;	0.857828	0	0	0	0	0	0	0	0	0	0	0	0	0	0	0	0	0	0	0	0	0	7	8	0	0	0	0	0	0	0	0	0	0	0	0	0	0	0	0	0	0	0	0	0	0	0
316682f378759f0eb51da4a1dcfa0659	AGCTCCAATAGCGTATATTAAAGTTGTTGCAGTTAAAAAGCTCGTAGTTGGATTTGTGGCGTACGGTGGGTTCCGGGCACTTGTTGTCTGAGTAACTTGCTGTTGCCATCCTTGGGTGGAACCTGTGTGGCATTAGGTTGTCGTGCAGGGGATGCCCATCATTTACTGTGAAAAAATTAGAGTGTTCAAAGCAGGCTTATGCCGTTGAATATATTAGCATGGAATAATAAGATAGGACTTTTTTGCTATTTTGTTGGTTTGCGCAAAGAGGTAATGATTAATAGGGACAGTTGGGGGTATTCGTATTCCATTGTCAGAGGTGAAATTCTTGGATTTTTGGAAGACGAACTACTGCGAAAGCATTTACCAAGGATGTTT	Eukaryota;Stramenopiles;Ochrophyta;Bacillariophyta;Bacillariophyta_X;Raphid-pennate;Navicula;Navicula_sp.;	0.944466	87	1534	217	163	126	179	258	178	130	421	0	0	64	0	103	0	0	0	0	0	0	0	0	0	0	0	0	522	0	0	0	0	0	0	0	0	0	0	0	0	0	0	43	0	0	0
31792121a1102707a283713eeeb6bc81	AGCTCCAATAGCGTATATTAATGTTGTTGCAGTTAAAAAGCTCGTAGTTGGATTTCTGACAGGAGGCGGCCGGTCCGACCTATTTTGGTTGAGTACTTTGCGTCGTCTCTAGTCATCCTGATGGAGATCGCCTTTGGCATTCAGTTGTCGGGGTGGGATTCATCTCTTTTACTGTGAATAAAATAGAGTGTTTAAAGCAGGCAATTGCTGTGAATATGCTAGCATGGAATAATAAGATAGGACATTGGTGCTATTTTGTTGGTTTACACACCAAAGTAATGATTAAGAGGGATAGTTGGGGGTATTTCTATTTGTGATTCAGAGGTGAAATTCTTGGACATCGTAAAGAGAAACTACTGCGAAAGCATTTACCAAGGATGTTTTCATTGATCAAGAACG…	Eukaryota;Stramenopiles;Sagenista;Labyrinthulomycetes	0.859281	0	0	0	0	0	0	0	0	0	0	0	0	0	0	0	0	0	0	0	24	0	0	0	0	0	0	0	0	0	0	0	0	0	0	0	0	0	0	0	0	0	0	0	0	0	0
31b819e8cbd12e9087ed10163b107906	AGCTCCAATAGCGTATATTAAAGTTGTTGCAGTTAAAAAGCTCGTAGTTGGATTTGTGGCTGTCGCTAGCGGCCTAGCACCTAGTGTTAGCGCTTGCTGGCGTCGCCATCCTTGGGTGGAGCCTGCGTGGCATTAGGTTGTCGTGCAGGGGATGCCCATCGTTTACTGTGAGAAAATTAGAGTGTTCAAAGCAGGCTTATGCCGTTGAATATGTTAGCATGGAATAATAAGATAGGACCTCGGTACTATTTTGTTGGTTTGCGCACCGAGGTAATGATTAATAGGGACAGTTGGGGGTATTCGTATTCCATTGTCAGAGGTGAAATTCTTGGATTTCTGGAAGACGAACTACTGCGAAAGCATTTACCAAGGATGTTT	Eukaryota;Stramenopiles;Ochrophyta;Bacillariophyta;Bacillariophyta_X;Raphid-pennate;Nitzschia;Nitzschia_sp.;	0.797073	0	0	0	0	0	0	0	0	0	0	0	0	0	0	0	0	0	0	0	0	0	0	0	0	0	0	0	0	0	0	0	0	0	0	0	0	0	0	0	0	0	0	0	0	0	0
31deb53851c0b3acf5b49cd00c8c2a89	AGCTCCAATAGCGTATACTAAAGTTGTTGCAGTTAAAAAGCTCGTAGTTGAACTTCTGTACAGTCTCAGTTCTGGCTTAGGTCAAGCTGTTGGCTGTGCATCCGCTTGCAAAGCTAGTTCGGCCTTAACTGGTCGGCTGGTAGAGTAAGCCCTTTACTTTGAAAAAATTAGAGTGTTTCAGGCAGGCAATGGCTCGAATACATTAGCATGGAATAATGGAATAGGACTTTTGTCCATTTGGTTGGTTATTGGACATGAGTAATGATTAAAAGGGACAGTTGGGGGCATTGGTATTTAACAGTCAGAGGTGAAATTCTTGGATTTGTTAAAGACTAACTTATGCGAAAGCATTTGCCAAGGATGTTTTCATCAATCAAG	Eukaryota;Alveolata;Ciliophora;Oligohymenophorea;Scuticociliatia_1;Philasterida;Uronema;Uronema_marinum;	0.811755	0	0	9	0	0	0	0	0	0	0	0	0	0	0	0	0	0	0	0	0	0	0	0	0	0	0	0	0	0	0	0	0	0	0	0	0	0	0	0	0	0	0	0	0	0	0
31f6ac48228dd0eb6bb3382030701120	AGCTCCAATAGCGTATATTAAAGTTGTTGCAGTTAAAAAGCTCGTAGTTGGATTTCTGGTAGGAGCGACCATACCGGGCTTGATTGTCCGTGTAATGTGTTGTCTCCAGCCATCCTCGTGGAGAACGTTTCTGGCATTAATTTGTCGGATTCAGGACCCGCGTCTTTTACTGTGAAAAAATTAGAGTGTTTAAAGCAGGCAATTGGCTTGAATACATTAGCATGGAATAATAAGATAGGACTTTGGTGCTATTTTGTTGGTTTGCACATCAAGGTAATGATTAACAGAATCAGTCGGGGATATTCGTATGCAAATGTCAGAGGTGAAATTCTTGGATTTTTTACAGACGAACTACTGCGAAAGCATTTATCAAGGATGTTTTCATCAATCAAGAACGAA…	Eukaryota;Stramenopiles;Sagenista;Labyrinthulomycetes;Labyrinthulales;Labyrinthulaceae;Labyrinthulaceae_X;Labyrinthulaceae_X_sp.;	0.998278	0	0	0	0	0	0	0	0	0	0	0	0	0	0	0	0	0	0	0	2	0	0	0	0	0	0	0	0	0	0	0	0	0	0	0	0	0	0	0	0	0	0	0	0	0	0
3223dad5902b99f84b4cc39703753a70	AGCTCCAATAGCGTATACTAAAGTTGTTGCAGTTAAAAAGCTCGTAGTTGAATTTCTGGTCGTGGCGATCGGTCCGTCCCTCACGGGATGCGCACCTGGTCTCTACGTCCATCCTCGGGGAGAGCACGTCTGGCATTCAGTTGTCGGGCGTGGGATCCTCGTCATTTACTGTGAGCAAAATAGAGTGTTCAAAGCAGGCTTAGGCCGTTGAATACATTAGCATGGAATAATAAGATAGGACCTTGGTCTATTTTGTTGGTTTGTACTCCAAGGTAATGATTAATAGGGATAGTTGGGGGTATTCGTATTCAATTGTCAGAGGTGAAATTCTTGGATTTATGGAAGACGAACTACTGCGAAAGCATTTACCAAGGATGTTT	Eukaryota;Stramenopiles;Ochrophyta;Chrysophyceae;Chrysophyceae_X;Chrysophyceae_Clade-F;Chrysophyceae_Clade-F_X;Chrysophyceae_Clade-F_X_sp.;	0.763501	0	0	0	0	0	0	0	0	0	0	0	0	0	0	0	0	0	0	0	0	0	0	0	0	0	0	0	0	0	0	0	0	0	0	0	0	0	0	0	0	0	0	0	0	0	0
3235c15203f35c2efbee5dbe8e0633d8	AGCTCCAATAGCGTATATTAAAGTTGTTGCGGTTAAAAAGCTCGTAGTTGGATTTCTGTTGAGGACGACTGGTCCGCCCTCTGGGTGAGTATCTAGCTCGGCCTTGGCATCTTCTTGGAGAACGTATTGCACTTGATTGTGTGATTCGGTATCCAGGACTTTTACTTTGAGAAAATTAGAGTGTTTCAAGCAGGCACACGCCTTGAATACATTAGCATGGAATAATAAGATAGGACCTCGGTTCTATTTTGTTGGTTTCTAGAGCTGAGGTAATGATTAATAGGGATAGTTGGGGGCATTCGTATTTAACTGTCAGAGGTGAAATTCTTGGATTTGTTAAAGACGGACTACTGCGAAAGCATTTGCCAAGGATGTTT	Eukaryota;Alveolata;Dinoflagellata;Dinophyceae	1	0	0	0	0	0	0	0	0	0	0	0	0	0	0	0	0	0	0	0	0	0	0	0	0	0	0	0	0	0	0	0	0	0	0	0	0	0	0	0	0	0	0	0	0	0	74
324671a08559bbce8994184ea4b62f69	AGCTCCAATAGCGTATATTAAAGTTGTTGCAGTTAAAAAGCTCGTAGTTGGATTTGTGGCTTTCGCCGTGGCGTCCATTAGTTTGGTTCTGCCGTGGCGTGGCCATCCTTGGGTGGATTTTGTGTGGCATTAGGTTGTCGCGCAGGGGATGCCCATCGTTTACTGTGAAAAAATTAGAGTGTTCAAAGCAGGCTTATGCCGTTGAATATATTAGCATGGAATAATAAGATAGGTCTTGGGTCCTATTTTGTTGGTTTGCGGGCCTTGGAAATGATTAATAGGGACAGTTGGGGGTATTCGTATTCCATTGTCAGAGGTGAAATTCTTGGATTTCTGGAAGACGAACTACTGCGAAAGCATTTACCAAGGATGTTT	Eukaryota;Stramenopiles;Ochrophyta;Bacillariophyta;Bacillariophyta_X;Raphid-pennate	0.99891	19	61	18	458	20	593	27	88	0	3855	0	0	29	33	69	397	20	184	58	433	0	0	0	5	0	0	0	280	5	0	0	0	0	0	0	49	0	0	0	0	0	0	0	0	0	0
32527b0d84d471ce70a09914924a6a8f	AGCTCCAATAGCATATATTAAAGTTGTTGCAGTTAAAAAGCTCGTAGTTGAATTTCTGTCTGTTACGCGCTCGAAGCCATTTGGCGACGGACGCGTGCAGGCATTCTTCTACTCCTGGGGTAACTCAGTGCGGTAGAGCCTTTACTTTGAGAAAATTAGAGTGTTTCAAGCAAGCATCGCTTTGAATACTACAGCATGGAATAATACAATAGGACTTTAGGCCTATTTGTTGGTTTCAGGCCTGAAGTAATGATTAATAGGGACAGTTGGGGGCATTCGTATTGGACAGTCAGCGGTGAAATGCGATGATTTGTTCAAGACGAACTACTGCGAAAGCATTTGCCAAAGATGTTTTCATTGATCAAGAACGAAAG	Eukaryota;Alveolata;Apicomplexa;Colpodellidea;Colpodellida;Colpodellaceae;Colpodella;Colpodella_sp.;	1	0	0	0	0	0	0	0	0	0	0	19	0	0	0	0	0	0	0	0	0	0	0	0	0	0	0	0	0	0	0	0	0	0	0	0	0	0	0	0	0	0	0	0	0	0	0
326cd2c5d208e46fbefbe2e61fa87dd5	AGCTCCAATAGCGTATATTAAAGTTGTTGCAGTTAAAAAGCTCGTAGTTGGATTTCTGGTAGGAGCGACCATGCCGGGCTTGATTGTCTGTGCAATGTGTTGTCTCCAGCCATCCTCGTGGAGAACGTTTTTGGCATTAATTTGTCGGAGGCGGTATCCGCGTCATTTACTGTGAAAAAATTAGAGTGTTTAAAGCAGGCAATTGGCTTGAATACATTAGCATGGAATAATAAGATAGGACTTTGGTGCTATTTTGTTGGTTTGCACATCAAGGTAATGATTAACAGAATCAGTCGGGGATATTCGTATGCAAATGTCAGAGGTGAAATTCTTGGATTTTTTACAGACGAACTACTGCGAAAGCATTTATCAAGGATGTTT	Eukaryota;Stramenopiles;Sagenista;Labyrinthulomycetes;Labyrinthulales;Labyrinthulaceae;Labyrinthulaceae_X;Labyrinthulaceae_X_sp.;	0.962327	0	0	0	0	0	0	0	0	0	0	0	35	0	0	0	0	0	0	0	0	0	0	0	0	0	0	0	0	0	0	0	0	9	0	0	0	0	0	0	0	0	0	0	41	0	0
329722833c6fed34fc555e59439e6df5	AGCTCCAATAGCGTATATTAAAGTTGTTGCGGTTAAAAAGCTCGTAGTTGGATTTCTGCCGAGGACGACCGGTCCGCCCTCTGGGTGAGTATCTGGCTCGGCCTGGGCATCTTCTTGGAGAACGTAGCTGCACTTGACTGTGTGGTGCGGTATCCAGGACTTTTACTTTGAGGAAATTAGAGTGTTTCAAGCAGGCACACGCCTTGAATACATTAGCATGGAATAATAAGATAGGACCTCGGTTCTATTTTGTTGGTTTCTAGAGCTGAGGTAATGATTAATAGGGATAGTTGGGGGCATTCGTATTTAACTGTCAGAGGTGAAATTCTTGGATTTGTTAAAGACGGACTACTGCGAAAGCATTTGCCAAGGATGTTT	Eukaryota;Alveolata;Dinoflagellata;Dinophyceae	1	53	134	46	100	355	49	53	81	64	43	0	0	50	0	0	0	0	0	0	0	0	0	0	0	0	0	0	0	0	0	0	0	0	0	0	0	0	0	0	0	0	0	0	0	0	0
329af295b8110f4a3084587c01d3844c	AGCTCCAATAGCGTATACTAAAGTTGTTGCAGTTAAAAAGCTCGTAGTTGAATTTCTGGTCGTGGCCACCGGTCCGCCCTTCACGGGGTGTGCACCAGGTGGCTGCGTCCATCCTCGGGGAGAGCATATCGGGCATTAAGTTGTCTGGTGTGGGATCCTCGTCATTTACTGTGAGCAAAATAGAGTGTTCAAAGCAGGCTTAGGCCGTTGAATACATTAGCATGGAATAATAAGATAGGACCTTGGTCTATTTTGTTGGTTTGCATTCCAAGGTAATGATTAATAGGGATAGTTGGGGGTATTCGTATTCAATTGTCAGAGGTGAAATTCTTGGATTTATGGAAGACGAACTACTGCGAAAGCATTTACCAAGGATGTTT	Eukaryota;Stramenopiles;Ochrophyta;Chrysophyceae;Chrysophyceae_X;Chrysophyceae_Clade-F;Chrysophyceae_Clade-F_X;Chrysophyceae_Clade-F_X_sp.;	0.761343	0	0	0	0	0	0	0	0	0	0	274	25	0	0	0	0	0	0	0	0	0	0	0	0	0	0	0	0	0	0	0	0	0	0	0	0	0	0	0	0	0	0	0	0	0	0
32e522378b73c892821ecdc3e12793f4	AGCTCCAGTAGTGTATATCAAAGTTGTTGCGGTTAAAAAGCTCGTAGTTGGATTTCCCGGGATGTAAGGTGTGGGATGTGGTCATTTGAACTGCGGCCGCGGCTTTACCGGTTGTTGGACGAGCCTCTTTTTGGGGGGACGTGTGACGTGTACTTTGAACAAATTAGAGTGCTCAAGACAGGCGATATTATTATTGCTGTGAATAGATTAGCATGGAATACGGGTATAAACTCTCTTCTCGGGATTGTTGTTTTGACGAGGAGGGGGAATGATGGATAGGGACAGGTGTGGGCATTGAGATTGTTACGTCAGAGGTGAAATTCTTAGATCGTAGCAGGATTAGCAGACGCGAAAGCATTTGTCAAGGATGTTT	Eukaryota;Apusozoa;Apusomonadidae;Apusomonadidae_Group-2;Apusomonadidae_Group-2B;Apusomonadidae_Group-2B_X;Apusomonadidae_Group-2B_XX;Apusomonadidae_Group-2B_XX_sp.;	0.999997	0	0	0	0	0	0	0	0	0	0	0	0	0	0	0	0	0	0	0	0	0	0	0	0	0	0	0	0	0	0	0	0	231	0	0	0	0	0	0	0	0	0	0	391	0	0
32fb339b0bc6de30d1f43392d5eece08	AGCTCCAATAGCGTACACCAATGCTGTTGTGGTTAAAAAGCTCGTAGTTGGATTTGAGTCTAGTTGCGGCCGGGCTCAGGGCTTTGACTCTGGGGCGGGCGTGTAGACTGTATGCGCGCGGGGAGGGGCAGGGAATTTTCTCTGCTTTCTCGTGTGCTTTACTTTGAACAAATTAGAGTGTTTAAAGCAGGCATTTTTTGCCTTGAATACATTAGCATGGAATAACGATTTTGACTGGAGCAGGCATGATGTTGTCTTGATGACTGCGCAGTAATGATGGATAGGGACGGTCGGGGACATTCGTATTGCTCCGTCAGAGGTGAAATTCTTAGATTGGAGGAAGACGAGCTGATGCGAAAGCCTTTGTCAAGGACGTTT	Eukaryota;Apusozoa;Apusomonadidae	1	0	0	0	0	0	0	0	0	0	0	0	0	0	0	0	0	0	0	0	0	0	0	0	0	0	0	0	0	0	0	0	0	0	0	0	0	0	0	0	0	0	0	0	0	12	0
331d9597f0aa71589e1ef5b91cbe7a62	AGCTCCAATAGTGTATCTTAATGTTGTTGCAGTTAAAAAGCTCGTAGTTGAATTTCTGGCAATCCGGCTGATCTAAATGTGACGCAAGGATATGTCATCCGCATTGGAACTACATTTGATAGCGATATCAGTGTACGGAAGGTGCATTTTACTTTGAAGAAATTAGAGTGTTCCAGGCAGGCTATGCTTGAATATTACAGCATGGAATAATGGAATAGGACATGTCTATTTTATTGGTTATTAGACTTGTAATGATTAACAGGGACAGTTGGGGGCATTCGTATTGGGTAGTCAGAGGTGAAATTCTTAGATTTACTCAAGACGCACTAATGCGAAAGCATTTGCCAAGGATGTTT	Eukaryota;Alveolata;Ciliophora;Phyllopharyngea;Cyrtophoria_7;Hartmannulidae;Hartmannulidae_X;Hartmannulidae_X_sp.;	0.999918	0	0	0	0	0	0	0	0	0	0	0	0	0	0	0	0	0	0	0	0	0	0	0	0	0	0	0	0	0	0	0	0	0	0	0	0	0	0	0	0	0	0	0	0	0	5
337e5a9094e907e5a83a7b9e5e2c2d9b	AGCTCCAGAAGCGTATGCTAATGTTGTTGCAGTTAAAAAGCTCGTAGTTGAATTTCTGGTGTGTCTGACCGAGCCTTTGGGCGTATGCTCACTGTTTTGCTTGTTGTTCGGACTGGCCATCTTAGATGCCTGTCAAGGGCATCTTCATTCACTGTAAAGAAAGCAGAGTGTTCAAAGCAGGTTGTAAAATCTGAATGTTTATTATGGGATGATGAGATAGGGCTCGCGCGCTATTTTGTTGGTTTGCACGCGCAAGTAATGGTGGATGGGAACAGTTGGGGCTATTCGTATTTGGCAGCTAGAGGTGAAATTCTTGGATCTGCAAAAGACGAACCAAGGCGAAGGCATTTAGCAAAGATGTTT	Eukaryota;Stramenopiles;Sagenista;Labyrinthulomycetes;Thraustochytriales;Thraustochytriaceae	0.999754	0	0	0	0	0	0	0	0	0	0	0	0	0	0	0	108	0	0	0	119	0	0	0	0	0	0	0	0	0	0	0	0	0	0	0	0	0	0	0	0	0	0	0	0	0	0
33a103a392a855fb45ab844c78efbb0b	AGCTCCAATAGCGTATATTAAAGTTGTTGCAGTTAAAAAGCTCGTAGTTGAATTTCTGGGTCCACCGGTCGCCGGCTTCGGTCGAGCTTCCCGCGGATTCATCCTCGCCCTTCGGGGCGTCATTTACTGTGAAAAAATTAGAGTGTTTAAAGCAGGCTTAGGCTTGAATACATTAGCATGGAATAATAAGATAGGACCGAGTCGTATTTTGTTGGTTGCGCGAAACGGTAATGATTAATAGGGACAGTTGGGGGTATTCATATTTAATTGTCAGAGGTGAAATTCTAAGATTTGTTAAAGATGAACTACTGCGAAAGCATTTACCAAGGATGTTT	Eukaryota;Stramenopiles;Opalozoa;Bicoecea;Anoecales;Cafeteriaceae;Pseudobodo;Pseudobodo_tremulans;	0.997825	0	0	0	0	0	0	0	0	0	0	0	0	0	0	0	0	0	0	0	0	0	0	0	0	0	0	0	0	0	0	0	0	77	0	0	0	0	0	0	0	0	0	0	230	0	0
33b3122a48d1ccf2ec4dff2469842c2b	AGCTCCAATAGCGTATATTAAAGTTGTTGCAGTTAAAAAGCTCGTAGTTGAACTTCTGCCCGCTCCTCTGCGCGCTCCGGTGCGCCTAGGGGCGGTCATCAGTCAGAGAGCTTTGGTGGGCCTTCACTGGTCGCCGGGTAATCTGACGCTTTACTTTGAAAAAATCAGAGTGTTCAAGGCAGGCAATCGCCCTGAATACACAAGCATGGAATAATGGAAGAGGACTTTGGTCCATTTTGTTGGTTATTGGACCTAAGTAATGATTAATAGGGACAGTTGGGGGCATTAGTATTTAATTGTCAGAGGTGAAATTCTTGGATTTATTAAAGACTAACTTATGCGAAAGCATTTGCCAAGGATGTTT	Eukaryota;Alveolata;Ciliophora;CONTH_1;CONTH_1_X;CONTH_1_XX;CONTH_1_XXX;CONTH_1_XXX_sp.;	1	0	0	0	0	0	0	0	0	0	0	0	0	0	0	0	0	0	0	0	0	0	0	0	0	0	0	0	0	0	0	0	0	0	0	0	0	0	0	0	0	0	0	0	0	0	32
345eaa5e46a855b5dca1631220206f6b	AGCTCCAATAGCGTATATTAAAGTTGTTGCGGTTAAAAAGCTCGTAGTTGGATTTCTGTCGGGGACGATCGGTCCGCCCTCTGGGTGTGTATCTGGCTCGGCCTTGGCATCTTCTTGGTGAACGTTTCCGCACTTGTGTGGGGCGGTGGCCAAGGCCTTTACTTTGAGGAAATTAGAGTGTTTCAAGCAGGCTAACGCCTTGAATACACTAGCATGGAATAATAAGATAGGACCTTAGTTCTATTTTGTTGGTTTCTAGAGCTGAGGTAATGATTAATAGGGATAGTTGGGGGCATTCGTATTTAACTGTCAGAGGTGAAATTCTTGGATTTGTTAAAGACGAACTACTGCGAAAGCATTTGCCAAGGATGTTT	Eukaryota;Alveolata;Dinoflagellata;Dinophyceae	0.999792	0	0	0	0	0	0	0	0	0	0	0	0	0	0	0	0	0	0	0	0	0	0	0	0	0	0	0	0	0	10	0	0	0	0	0	0	0	0	0	0	0	0	0	0	0	0
34887af2c7aa3f6364a48d53f1dd22e5	AGCTCCAGAAGCGTATATTAAAGTTGTTGCAGTTAAAAAGCTCGTAGTTGAATGTCTGGTATTTTGGCCGTGTGGGTCCGTGGGTTTTCTTTGTTTTTACGAAGAGGCTCGTTTGTGTATCCGCATTTTGTGCCTGCCATTTGTCTGAGGAGTTATTTTAACGATGATTCCACAGGTTGTTTACTTTGAAAAAATTAGAGTGTTTAAAGCGGGACGTTTGATATGTCCATTGAATACATTAGCATGGAATAATGAGATAGGACTCTGGGCTTATTTTGTTGGTTTCTGAGCGTGGAGTAATGATTGATAGGGACGGTTGGGGGTGCTAGTATTCAAGGGCCAGAGGTGAAATTCTTGGATTCGTTGAAGACTAACTAATGCGAAAGCATTCACCAAGGA…	Eukaryota;Rhizaria;Cercozoa	0.975546	0	0	0	0	0	0	0	0	0	0	0	0	0	0	0	162	0	0	0	0	0	0	0	0	0	0	0	0	0	0	0	0	0	0	0	0	0	0	0	0	0	0	0	0	0	0
34b05b1c4f880b3057ecef9d339bdb8f	AGCTCCAATAGCGTATATTAATGTTGTTGCAGTTAAAAAGCTCGTAGTTGAATTTAGAAGGGGAAACTCTTCTGTTTGTCCTCACCCCTGCATCCGATTTGTTGCTTGGGTGATCAAACTTTTACTGTGAGAAAACTAAAGTGCTCAAAGCAGGCTAACGCTTGAATATTAAAGCATGGAATAATAAAATAGGACTTTATTCATTTTATTGGTTATTGAATGAAGTAATGATTAACAGAAACAGTTGGGGGCATTCGTATTTAATTGTCAGAGGTGAAATTCTTGGATTTATTAAAGACGAACCAGTGCGAAAGCATTTGCCAAGGATGTTT	Eukaryota;Alveolata;Ciliophora;Phyllopharyngea;Suctoria;Ephelotidae;Ephelota;Ephelota_sp.;	0.99981	0	14	0	0	0	0	6	8	7	5	6	5	6	0	12	7	10	16	1612	20	0	0	0	0	0	1829	0	0	0	0	0	0	0	171	0	0	0	0	0	5	0	0	0	0	0	0
34b60ff6919a30fb11c3cb47ce934eb4	AGCTCCAATAGCGTATATTAAAGTTGTTGCAGTTAAAAAGCTCGTAGTTGGATTTCTGGATATGCGCTGATGTCGGCCGTGTGCTCGTGCAGATGCGCGTTTCCATCCTTCTGTTAACGTTTCTTGGTATTCATTTACTGGTTTCGGGCTCAGATATTTTACCTTGAGAAAATTAGAGTGTTTCAGGCAGGCTAGCGCCGGAATACATTAGCATGGAATAATAGAATAGGACTACGGTTCCTTTTGTTGGTTTGAGGGCCGAAGTAATGGTTAATAGGGATAGTTGGGGGCATTAGTATTTAATTGTCAGAGGTGAAATTCTTTGATTTGTTAAAGACTAACCTATGCGAAAGCATTTGCCAAGGATGTTT	Eukaryota;Alveolata;Ciliophora;Spirotrichea;Euplotia;Gastrocirrhidae;Euplotidium;Euplotidium_itoi;	0.840608	0	0	0	0	0	0	0	0	0	0	0	0	0	0	0	0	0	0	0	0	0	0	0	0	0	0	0	0	0	0	0	0	0	0	0	0	0	0	0	0	0	0	0	0	0	0
34b77a63a77b9372e4308ad2f1a9f8f2	AGCTCCAGTAGCGTATATTAAAGTTGTTGCAGTTAAAAAGCTCGTAGTCGAACTTCGGACTTGGAGGAACGGTCTGCCTTACGGTACGCACTGTTTGTCTGAGTCTTACCTCTTGGTGAGGCTGTATGCTCTTTACTGAGTGTGCAGTGGAACCAGGAATTTTACCTTGAGAAAATTAGAGTGTTCAAAGCAGGCAATCGCCCGAATACATTAGCATGGAATAATAGAATAGGACGTGCGGTTCTATTTTGTTGGTTTCTAGGATCGCCGTAATGATTAATAGGGACGGTCGGGGGCATTAGTATTCCGTTGCTAGAGGTGAAATTCTTAGATTTACGGAAGACTAACAACTGCGAAAGCATTTGCCAAGGACGTTT	Eukaryota;Opisthokonta;Fungi;Basidiomycota;Agaricomycotina;Tremellomycetes;Trichosporon	0.999999	0	0	0	0	0	0	0	0	0	0	0	0	0	0	0	0	0	0	0	0	0	0	0	0	0	0	0	0	0	0	0	0	0	0	0	0	0	27	0	0	0	0	0	0	0	0
34cf90e6f9d73e33d17698c3137146fd	AGCTCCAATAGCGTATACTAATGTTGCTGCAGTTAAAAAGCTCGTAGTTGGATTTCTGGCTTTGGCGCACCCGGCCCAGCCTTTGGTTTGGGTGCCGGCGTGCGCCGGCCATTCCCTCCAGGCGATCTACTCTGCCATTGATTTGGTTGGGGTAGGGAGCTTGGTCTTTCACTGTGAATAAATTAGAGTGTTCAAAGCAGGCCGCAGTGCCGTGAATAGCCCAGCATGGAATGATAAGATAGGGCTTCGGGTGTGGGGGCGTTTCGGCGCTCTTGCACTTCCTTGTTTTGTTGGTTTTAAGGGCCGGAGTAATGATTGATAGGGAGCGTTGGGGGTGCTAGTATTCAATGGCCAGAGGTGAAATTCTTGGATTCATTGAAGACTAACATCAGCGAAAGC…	Eukaryota;Rhizaria;Cercozoa;Endomyxa;Reticulosida;Filoretidae;Filoreta;Filoreta_tenera;	1	0	0	0	0	0	0	0	0	0	0	0	0	0	0	0	0	0	0	0	8	0	0	0	0	0	0	0	0	0	0	0	0	0	0	0	0	0	0	0	0	0	0	0	0	0	0
34d25efee3b1ab416c6c009e3ce45727	AGCTCCAATAGCGTATATTAATGTTGTTGCAGTTAAAAAGCTCGTAGTTGAATTTCTGGACTTGACGTTCGGTCCGTGGCCTTGTGTCATGTGTACTGTTTTAGTCAAGACCATCTTAGTAGTGAGTGTTACTGGCATTAAGTTGTCGGTTGCAGGAGCTGCTTCGTTTACTGTGAATAAAATAGAGTGTTTAAAGCAGGCATTACGCCTTGAATACTTCAGCATGGAATAAAATTATAGGACTTAGGTGCTATTTTATTGGTTTGCACACCTAGTAATGATTAATAGGGATAGTTGGGGGTATTCATATTTGATTGTCAGAGGTGAAATTCTTGGATTTATGAAAGATGAACTTATGCGAAAGCATTTACCAAGGATGTTT	Eukaryota;Stramenopiles;Opalozoa;MAST-12;MAST-12A;MAST-12A_X;MAST-12A_XX;MAST-12A_XX_sp.;	0.999999	0	0	0	0	0	0	0	0	0	0	0	0	0	0	0	0	0	0	0	0	0	0	0	0	0	0	0	0	0	0	0	0	0	0	0	0	0	0	0	0	0	0	4	0	0	170
34ed6c85e658c7756c6424c7f14c1377	AGCTCCAATAGCGTATATTAAAATTGTTGCCGTTAAAAAGCTCGTAGTCGAACTTCGGGCTCTGTCAGCCGGTCCGCCTTCTTGGTGTGTACTTGTTTGACGGAGCCTTACCTCCTGGTGAACGGCGATGTCCTTTACTGGGTGTCGTCGCAAACCAGGACTTTTACTTTGAAAAAATTAGAGTGTTCAAAGCAGGCCTTTGCCCGAATACATTAGCATGGAATAATAAAATAGGACGCGCGTTCCCATTTTGTTGGTTTCTGAGATCGCCGTAATGATTAATAGGGATAGTTGGGGGCATTTGTATTCCGTCGTCAGAGGTGAAATTCTTGGATTGCCGGAAGACAAACTACTGCGAAAGCATTTGCCAAGGATGTTT	Eukaryota;Opisthokonta;Fungi;Basidiomycota;Pucciniomycotina;Cystobasidiomycetes;Rhodotorula;Rhodotorula_mucilaginosa;	0.902119	0	0	0	0	0	0	0	0	0	0	0	0	0	0	0	0	0	0	0	0	136	0	0	0	0	0	119	0	0	0	0	0	0	0	0	0	0	0	0	0	0	0	0	0	0	0
350ef01842de1da61f1c7b541e3975f4	AGCTCCAGTAGCGTATATTAAAGTTGTTGCAGTTAAAAAGCTCGTAGTTGGATTTCTGGTATGAGAGGTCTGGCCCGCCACGGTTACGTGCGTGTGCGCCGGATGGTCTCTACCATCTTTCTAGTTTTCTGCCCTACCATTCATTTGGCCTGGGCTCAGAGACTGGATCTTTTACTTTGAAAAAATTAGAGTGTTTAAAGCAGGCGTTTGTCATTTGAATACATTAGCATGGAATAATAATCTAGGACTTAGTTCTTATTTTGTTGGTTTCTAAGAATCAGGTAATGATTGATAGGGATAGTTGGGGGTGCTAGTATTCAACGGCCAGAGGTGAAATTCTTGGATTCGTTGAAGACTAACTTATGCGAAAGCATTCACCAAGGATGTCT	Eukaryota;Rhizaria;Cercozoa;Cercozoa_X;Cercozoa_XX;Cercozoa_XXX;Cercozoa_XXXX;Cercozoa_XXXX_sp.;	0.71789	0	0	0	0	0	0	0	0	0	0	0	19	0	0	0	0	0	0	0	0	0	0	0	0	0	0	0	0	0	0	0	0	0	0	0	0	0	0	0	0	0	0	0	0	0	0
3520a1c53a2ddf171d91e0e19fefb15c	AGCTCCAGTAGTGTATATCAAAGTTGTTGCGGTTAAAAAGCTCGTAGTTGGATTTCCCGGCAAAATAAGGTGCGGGATGTGGTCATTTGAACTGCGGCCGTGTCTTTTCCGGTGGTTGTGGTTCCCTTTGGGGGGTTGCGGCATGTACTTTGAACAAATTAGAGTGCTCAAGACAGGCGATTTTTTATTGCTGTGAATAGATTAGCATGGAATACGGGTATAAACTCTCTTCTCGGGATTGTTGTTTTGACGAGGAGGGGGAATGATGGATAGGGACAGGTGTGGGCATTGAGATTGTTACGTCAGAGGTGAAATTCTTAGATCGTAGCAGGATTAGCAGACGCGAAAGCATTTGTCAAGGATGTTT	Eukaryota;Apusozoa;Apusomonadidae;Apusomonadidae_Group-2;Apusomonadidae_Group-2B;Apusomonadidae_Group-2B_X;Apusomonadidae_Group-2B_XX;Apusomonadidae_Group-2B_XX_sp.;	1	0	0	15	33	0	0	0	24	17	12	1694	2887	0	24	33	28	39	0	31	55	232	0	0	0	0	0	0	0	0	0	0	0	0	0	0	0	0	0	0	0	0	0	0	86	0	0
352667b2fe4e6638f5676483c77f9bab	AGCTCCAATAGCGTATATTAAAGTTGTTGCAGTTAAAAAGCTCGTAGTTGAATTTCTGTATAATCCCGGTGCCGGCTCTTGTCGAACCGTGGGTTGTACATCCGCTTACAAACTTAGCCCGGTCTTCATTGGTCGACTAAGGGAGTAGGCCCTTTACTTTGAAAAAATTAGAGTGTTTCAAGCAGGCAATGGCTCGAATACATTAGCATGGAATAATGGAATAGGACTTGTGTCCATTTGGTTGGTTATTGGACATTAGTAATGATTAACAGGGACAGTTGGGGGCATTAGTACTGAACAGTCAGAGGTGAAATTCTTGGATTTGTTCAAGACTAACTTATGCGAAAGCATTTGCCAAGGATGTTT	Eukaryota;Alveolata;Ciliophora;Oligohymenophorea;Scuticociliatia_1;Philasterida;Metanophrys;Metanophrys_sinensis;	0.925729	0	0	0	0	0	0	0	0	0	0	9	0	0	0	0	0	0	0	0	0	0	0	0	0	0	0	0	0	0	0	0	0	0	0	0	0	0	0	0	0	0	0	0	0	0	0
353c07e2eb8d5935d6bf8fe69fa9e475	AGCTCCAGAAGCGTATGCTAACGTTGTTGCAGTTAAAAAGCTCGTAGTTGAACGTCTGTCGGTTGGGTCTGTGGGGCGAATGCTCTGTAGATCGGCCTTTTTTCTTCTTGGCTCTCTCTTTGAGGGGGCCTCGTTCACTGTAAACAAATTGGAGTGCTCCACGCAGGTCGTTGGGACCTGGACAATTGTTATGGGATGATGAGATAGGGCTCGGGCACTATTTTGTCGGTTTGCATGCCTGGGTAATGGTGAATAGGAACAGTTGGGGATATTCGTATTTAGCGGTCAGAGGTGAAATTCTTGGATTCGGGAAAGACGAACAACTGCGAAGGCATTTATCAAAGATGTTT	Eukaryota;Stramenopiles;Sagenista;Labyrinthulomycetes;Thraustochytriales;Thraustochytriaceae;Thraustochytriaceae_X;Thraustochytriaceae_X_sp.;	0.938329	0	0	0	0	0	0	0	0	0	0	0	0	0	0	0	0	0	39	0	0	0	0	0	0	0	0	0	0	0	0	0	0	0	0	0	0	0	0	0	0	0	0	0	0	0	0
353f804a16078b5fed0737fad109b927	AGCTCCAATAGCGTATATTAAAGTTGTTGCAGTTAAAAAGCTCGTAGTTGAATTTCTGAGCTCGCCGAGCGGCGGTCTTTGGCCGACCACTCCGCAAGTTCATCCTCGCCCCTCGGGGCGTCATTTACTGTGAAAAAATTAGAGTGTTTAAAGCAGGCTTTAGGCTTGAATACATTAGCATGGAATAATGAGATAGGACCAAGTCGTATTTTGTTGGTTGCGCGATTCGGTAATGATTAATAGGGACAGTTGGGGGTATTCGTATTCCATTGTCAGAGGTGAAATTCTTGGATTTCTGGAAGACGAACTACTGCGAAAGCATTTACCAAGGATGTTT	Eukaryota;Stramenopiles;Opalozoa;Bicoecea;Anoecales;Cafeteriaceae;Cafeteria	0.822063	0	0	0	0	0	0	0	0	0	0	0	0	0	0	0	0	0	0	0	0	0	33	0	0	0	0	0	0	0	0	0	0	0	0	0	0	0	0	0	0	0	0	0	0	0	0
356ec01990e605fd9bf7c6ba5ece1aae	AGCTCCAATAGCGTATATTAATGTTGTTGCAGTTAAAAAGCTCGTAGTTGGATTTGTGGTGTGTCCTGTTGGTCCATGGACTCAGTCCATGTGTCTTTACGGGTCTGCCTTTTATGGGATTGTTGGCTTTGTGGCATTAGGTTGTCGCATTGTTGATGCCCATCTTTTACTGTGAAAAAATTAGAGTGTTCAAAGCAGGCTTATGCCGTTGAATATATTAGCATGGAATAATGATATAGGACCTTGGTACTATTTTGTTGGTTTGCGCACTAAGGTAATGATTAACAGGGACAGTTGGGGGTATTTGTATTCCATTGTCAGAGGTGAAATTCTTGGATTTTTGGAAGACAAACTACTGCGAAAGCATTTACCAAGGATGTTT	Eukaryota;Stramenopiles;Ochrophyta;Bacillariophyta;Bacillariophyta_X;Raphid-pennate;Nitzschia;Nitzschia_inconspicua;	0.98404	0	0	0	0	0	0	0	0	0	0	0	0	0	0	0	0	0	0	87	0	0	8	0	0	0	0	11	0	0	0	0	14	0	0	0	0	0	0	0	0	0	0	0	0	0	0
357c67d42a3040d059f63827a330c172	AGCTCCAATAGCGTATACTAAAGTTGTTGCAGTTAAAAAGCTCGTAGTTGAATTTCTGGGCGTGTCAGCTGGTCCGCACTTAATTGTGTGAGTACTTGGTTGGTGCGTCCATCCTCGGGGAGAGCATATCTGGCATTCATTTGTCGGGTATGGGACCCTCGTCATTTACTGTGAGCAAAATAGAGTGTTCAAAGCAGGCTTAGGCCGTTGAATACATTAGCATGGAATAATAAAATAAGACCTCGGTTTATTTTGTTGGTTTGTATTCCAAGGTAATGATTAATAGGGATAGTTGGGGGTATTCGTATTCAATTGTCAGAGGTGAAATTCTTGGATTTATGGAAGACGAACTACTGCGAAAGCATTTACCAAGGATGTTT	Eukaryota;Stramenopiles;Ochrophyta;Chrysophyceae;Chrysophyceae_X;Chrysophyceae_XX;Chrysophyceae_XXX;Chrysophyceae_XXX_sp.;	0.998912	0	0	0	0	0	0	0	0	0	0	0	0	0	0	0	0	0	0	0	0	0	36	12	22	16	12	0	16	20	0	0	10	15	24	0	16	24	16	4822	3006	0	3097	17	0	14	30
357cb1d08e76d6f15d75e764ed77686c	AGCTCCAATAGCGTATATTAAAGTTGTTGCAGTTAAAAAGCTCGTAGTTGGATTTCAAGAAGCTCAGAAAGGAAACTTTACTGACTTCTACCAGTCTTTGACTGTTACTGTGAGAAAATTAGAGTGTTTCAAGCAGGCAATTGCAGGAATACATTAGCATGGAATAACGAATGTATCTACAGTTCTGGTTGATTGTAGAATACGATTAATAGGGACAGTTGGGGGCATTAGTATTTAATTGTCAGAGGTGAAATTCTTGGATTTATTAAAGACTAACGTATGCGAAAGCATTTGCCAAGGATGTTT	Eukaryota;Alveolata;Ciliophora;Litostomatea;Haptoria_5;Pleurostomatida;Amphileptus;Amphileptus_dragescoi;	0.999946	0	0	0	0	0	0	0	0	0	0	0	0	0	0	0	0	0	0	0	0	0	0	0	0	0	0	0	0	0	0	0	0	0	0	0	0	0	0	0	0	0	0	0	0	0	0
35ab8b7daee896d9ad99cbf469cd24e2	AGCTCCAAAAGCGTATATTAAAGTTGTTGCAGTTAAAAAGCTCGTAGTTGGATTTCTGGTAGGAGCGACCATGCCGGGCTTGATTGTCCGTGTTTTGTGTTGTCTCCAGCCATCCTCGTGGAGAGCGTTTCTGGCATTAGTTTGTTGGAGGCGGGACCCGCGTCTTTCACTGTGAAAAAATTAGAGTGTTTAAAGCAGGCAATTGGCTTGAATACATTAGCATGGAATAATAAGATAGGACTTTGGTGCTATTTTGTTGGTTTGCACATCAAGGTAATGATTAACAGAATCAGTCGGGGATATTCGTATGCAAATGTCAGAGGTGAAATTCTTGGATTTTTTACAGACGAACTACTGCGAAAGCATTTATCAAGGATGTTTTCATCAATCAAGAACGAA…	Eukaryota;Stramenopiles;Sagenista;Labyrinthulomycetes;Labyrinthulales;Labyrinthulaceae;Labyrinthulaceae_X;Labyrinthulaceae_X_sp.;	0.998943	0	0	0	0	0	0	0	0	0	0	0	0	0	0	0	0	0	0	0	0	0	0	0	0	0	0	0	0	0	0	0	0	0	0	0	0	0	0	0	0	0	0	0	1	0	0
35adf85c6e5d132497378030e80fb286	AGCTCCAATAGCGTATATTAAAGTTGTTGCAGTTAAAAAGCTCGTAGTTGGATTTCTGGTAGGAGTGACCGTTCCGAACTTGATTGTTCGTGTATTGTGTTTTCTCCAGCCATCCTTGTGGAGAACTTTTCTTGCATTAATTTGTAGGGATTGGGACCCACATCGTTTACTGTGAAAAAATTAGAGTGTTTAAAGCAGGCAATCGCTTGAATACATTAGCATGGAATAATAAGATAGGACTTTGGTACTATTTTGTTGGTTTGCATACCAAATTAATGATCAACAGGAACAGTTTGAGGATATTCGTATGAACATGTCAGAGGTGAAATTCTTGGATTTTGATCAGACGAACTACTGCGAAAGCATTTATCAAGGATGTTT	Eukaryota;Stramenopiles;Sagenista;Labyrinthulomycetes;Thraustochytriales;Thraustochytriaceae;Labyrinthuloides;Labyrinthuloides_minuta;	0.991316	0	0	0	0	0	0	0	0	0	0	0	0	0	0	0	0	0	0	0	0	0	0	0	0	0	0	0	0	0	0	0	74	0	0	0	0	0	0	0	0	0	0	0	0	0	0
35bb496b5de7525201a18615261f1e31	AGCTCCAATAGCGTATATTAAAGTTGTTGCAGTTAAAAAGCTCGTAGTTGGATTTCTGGCAGGATTTCGAAGCCCGCTTGTTGCGTGCGCTGAGAGACCCTACCATCCTTCTGTTAACCCGTCACGGCATTCACTTGCCGGTCGGGGGCTCAGATATTTTACCTTGAGAAAATTAGAGTGTTTCAGGCAGGCTCGCGCCGGAATACATTAGCATGGAATAATGGAATAGGACTTCGGCCTCTTCTGTTGGTCTGAGGGGTCAGAGTAATGATTAATAGGGATAGTTGGGGGCATTAGTACTTAACTGTCAGAGGTGAAATTCTCGGATTTGTTAAAGACTAACTTATGCGAAAGCATTTGCCAAGGATGTTT	Eukaryota;Alveolata;Ciliophora;Spirotrichea;Choreotrichida;Strombidinopsidae;Strombidinopsis;Strombidinopsis_batos;	0.947569	0	0	0	0	0	0	0	0	0	0	0	0	0	0	0	0	0	0	0	0	0	0	0	0	0	0	0	0	0	0	0	0	0	0	0	0	0	0	0	0	0	0	0	0	0	0
35c3b12c02408066060eb1d746dc0e46	AGCTTTATAATTAAAAACTAACATTGTTGCAGTTAAAAAGCTCGTAGTTGAAATTCTGATATTGGAAGACCTCGGTTGGAAAATATCATCCGTATGGGAACTAGGACTGGACTTCAAACTCTACCCTAGGAAACATACATTTTACTGTGAACAAATTAGAGTGTTTATAGCAGGCTTTCGCTTGAATACATCAGCATGGAATAATAGAATAGGACTTATCCCCTTTTATTGGTTAAATGGGTTAAGTAATGATTAACAGAAGCAGTTGGGGGCATTCGTATTCTATAGTCAGAGGTAAAATTCTTAGATTTATAGAGGACGAACTAATGCGAAGGCATTTGCCAAGGATGTTT	Eukaryota;Alveolata	0.776434	0	0	0	0	0	0	0	0	0	0	0	0	0	0	0	0	0	0	0	0	0	0	0	0	0	0	0	0	0	0	0	0	0	0	0	0	0	0	0	0	0	0	0	0	0	0
35d79546ea1bba98ee8d650ecd1d763f	AGCTCCAATAGCGTATATTAATGTTGTTGCAGTTAAAAAGCTCGTAGTTGGATTTCTGCGCCGCGCAGCTCGGTCCGCCGCACTGCGGTGCGACTGCGGCTGGAGCGTCGCATCCTTGTGGGGACTGTTGTTTGCCATTAATTTGGTGACTTCAGGAACCGCATCGTTTACTGTGAAAAAATTAGAGTGTTCAAAGCAGGCTTATGCCGTGAATACATTAGCATGGAATAATAAGATAGGACTTTGGTTCTATTTTGTTGGTTGGAGGCCAAGGTAATGATTAATAGGGATAGTTGGGGGTATTCATATTTAATTGTCAGAGGTGAAATTCTTGGATTTATGAAAGATGAACTTATGCGAAAGCATTTACCAAGGATGTTT	Eukaryota;Stramenopiles;Opalozoa;MAST-3;MAST-3J;MAST-3J_X;MAST-3J_XX;MAST-3J_XX_sp.;	1	0	4	0	0	0	0	0	0	0	0	0	0	0	0	0	0	0	0	218	109	0	0	0	0	0	0	0	0	0	0	0	0	14	0	0	0	0	0	0	0	0	0	250	0	62	32
35e2f2ed7db47cc2ba709ded87b62309	AGCTCCAATAGCGTATATTAAAGTTGTTGCAGTTAAAAAGCTCGTAGTTGGATTTGTGGTAGTCCCTGAGGTCCTCTTTTGGTACTTTTGGGGATCACCATCCTTGGGTGGATCCTGTGTGGCATTAGGTTGTCGCGCAGGGGATGCCCATCGTTTACTGTGAAAAAATTAGAGTGTTCAAAGCAGGCTTATGCCGTTGAATATATTAGCATGGAATAATGAGATAGGACCTTGGCCTATTTTGTTGGTTTGCGCGCCGAGGTAATGATTAATAGGGACAGTTGTGGGTATTCGTATTCCATTGTCAGAGGTGAAATTCTTGGATTTCTGGAAGACGAACTAATGCGAAAGCATTTACCAAGGATGTTT	Eukaryota;Stramenopiles;Ochrophyta;Bacillariophyta;Bacillariophyta_X;Raphid-pennate	0.999729	0	0	0	0	0	0	0	0	0	0	0	0	0	0	0	0	0	0	0	0	0	0	0	0	0	0	0	0	0	0	0	0	0	0	0	0	0	0	0	0	0	0	0	0	0	0
35f98c23839c043ed6e985aa0f6bad3a	AGCTCCAATAGCGTATATTAAAGTTGTTGCAGTTAAAAAGCTCGTAGTTGGATTTGTGGTGCGTGTCGAGGCGTCCGATTGTTCGGTTCTGCCTTGGCCGCGCCATCCTTGGGTGGAATCTGTGTGGCATTAGGTTGTCGTGCAGGGGATGCCCATCGTTTACTGTGAAAAAATTAGAGTGTTCAAAGCAGGCTTATGCCGTTGAATATATTAGCATGGAATAATAAGATAGGTCTTGGGTCCTATTTTGTTGGTTTGCGGGCCTTGGAAATGATTAATAGGGACAGTTGGGGGTATTCGTATTCCATTGTCAGAGGTGAAATTCTTGGATTTCTGGAAGACGAACTACTGCGAAAGCATTTACCAAGGATGTTT	Eukaryota;Stramenopiles;Ochrophyta;Bacillariophyta;Bacillariophyta_X;Raphid-pennate;Fistulifera	0.714127	0	0	0	0	0	0	0	0	0	0	0	0	0	0	0	0	0	0	0	0	0	0	7	68	2	42	0	48	18	9	10	0	0	0	6	9	0	0	0	1	2	0	0	2	0	0
360ad2794c15522cb869c2542654df3c	AGCTCCAATAGCGTATATTAAAGTTGTTGCAGTTAAAAAGCTCGTAGTTGGATTTCGGGCGTGTGCGCATGGTCCGCCGAAAGGTGTGCACTGTGCCTGTGCGCGCTCTCTTTCCGTAGGCTGCGTGTGCCCTTAACTGGGTGTGCGTGGAATGCGGATCGTTTACTTTGAATAAATTAGAGTGTTCAAAGCAGGCTTTCGCTTGGATACATTAGCATGGAATAATGGAATAGGACTTTGGTTCTATTTTGTTGGTTTCTAGGACCGAAGTAATGATTAATAGGGATAGTTGGGGGCATTAATATTTAATTGTCAGAGGTGAAATTCTTGGATTTATGAAAGATTAACTTCTGCGAAAGCATTTGCCAAGGATGTTT	Eukaryota;Apusozoa;Hilomonadea;Planomonadida;Planomonadidae;Planomonadidae_Group-1	1	0	0	0	0	0	0	0	0	0	0	0	0	0	0	0	0	0	0	0	0	53	0	0	0	0	0	0	0	0	0	0	0	0	0	0	0	0	0	0	0	0	0	0	0	0	0
360f366223aec5a40ad68d8351a0b2e7	AGCTCCAATAGCGTATATTAAAGTTGTTGCAGTTAAAAAGCTCGTAGTCGGATTTCTGATTGATATTGCGTAGTTGGCTTTTGTCAACTTCTCGATTCAGTCATTCTTCTACTCTTCAGTGGCAACACTGTTGCGGTAGAGCCTTTACTTTGAGAAAATTAGAGTGTTTCAAGCAAGCTTTTGCTTTGAATACTACAGCATGGAATAATACGATAGGACTTCGGACCTATTTGTTGGTTTCTGGTCTGAAGTAATGATAAATAGGGACAGTTGGGGGCACTCGTATTCGATCGTCAGCGGTGAAATGCATGGATTGATTGAAGACGAACTACTGCGAAAGCATTTGCCAAAGATGTTT	Eukaryota;Alveolata;Apicomplexa;Colpodellidea;Colpodellida;Colpodellaceae;Colpodella;Colpodella_sp.;	0.99992	0	0	0	0	0	0	0	0	0	0	6	19	0	0	0	0	0	0	0	0	0	0	0	0	0	0	0	0	0	0	0	0	0	0	0	0	0	0	0	0	0	0	0	0	0	0
3673f694c88d809a1fc4a38c955798fa	AGCTCCAATAGCGTATATTAAAGTTGTTGCAGTTAAAAAGCTCGTAGTTGGATCTGTGGCGTACGGTGGGCTCCGGGCACTTGTTGTCTGAGTAGCTTGCCGTTGCCATCCTTGGGTGGAACCTGTGTGGCATTAGGTTGTCGTGCAGGGGATGCCCATCGTTTACTGTGAAAAAATTAGAGTGTTCAAAGCAGGCTTATGCCGTTGAATATATTAGCATGGAATAATGAGATAGGACTTTTTCGCTATTTTGTTGGTTTGCGCGAAGAGGTAATGATTAATAGGGACAGTTGGGGGTATTCGTATTCCATTGTCAGAGGTGAAATTCTTGGATTTTTGGAAGACGAACTACTGCGAAAGCATTTACCAAGGATGTTT	Eukaryota;Stramenopiles;Ochrophyta;Bacillariophyta;Bacillariophyta_X;Raphid-pennate;Seminavis	0.766642	55	109	17	23	0	17	0	20	30	0	0	0	0	0	0	0	0	0	0	0	0	0	0	0	0	0	0	0	0	0	0	0	0	0	0	0	0	0	0	0	0	0	0	0	0	0
368934b68572cc7dfb9253eef9233759	AGCTCCAGAAGCGTATGCTAACGTTGTTGCAGTTAAAAAGCTCGTAGTTGAAGGTTTTTCGGTTGGGTCCGTGGGGCGAACGCCCCGCGGGCCGGCTTTTTTTTCTTGGCTCTCTCTTTGAGGGGGCCTCGTTCACTGTAAACAAATTGGAGTGCTCCACGCAGGTCGTTGGGACCTGGACAATTGTTATGGGATGATGAGATAGGGCTCGGGCACTATTTTGTCGGTTTGCATGCCTGGGTAATGGTGAATAGGAACAGTTGGGGATATTCGTATTTAGCGGTCAGAGGTGAAATTCTTGGATTCGGGAAAGACGAACAACTGCGAAGGCATTTATCAAAGATGTTT	Eukaryota;Stramenopiles;Sagenista;Labyrinthulomycetes;Thraustochytriales;Thraustochytriaceae;Thraustochytriaceae_X;Thraustochytriaceae_X_sp.;	0.943092	0	0	0	0	0	0	0	0	0	95	0	0	0	0	0	0	0	0	0	0	0	0	0	0	0	0	0	0	0	0	0	0	0	0	0	0	0	0	0	0	0	0	0	0	0	0
36997ca8da97d7b8cb08cd29099bc4a0	AGCTCCAATAGCGTATATTAAAGTTGTTGCAGTTAAAAAGCTCGTAGTTGGATTTGTGGTGTGTGCTGTGGCGTCCATTTGTTTGGTTCTGCCGTGGCTGCGCCATCCTTGGGTGGATTCTGCATGGCATTAGGTTGTCGTGTAGAGGATGCCCATCGTTTACTGTGAAAAAATTAGAGTGTTCAAAGCAGGCTTATGCCGTTGAATATATTAGCATGGAATAATAAGATAGGTCTTGGGTCCTATTTTGTTGGTTTGCGGGCCTTGGAAATGATTAATAGGGACAGTTGGGGGTATTCGTATTCCATTGTCAGAGGTGAAATTCTTGGATTTCTGGAAGACGAACTACTGCGAAAGCATTTACCAAGGATGTTT	Eukaryota;Stramenopiles;Ochrophyta;Bacillariophyta;Bacillariophyta_X;Raphid-pennate	0.998707	0	0	0	33	0	0	0	0	0	0	0	0	0	0	0	0	0	0	0	0	0	0	0	0	0	0	0	0	0	0	0	0	0	0	0	0	0	0	0	0	0	0	0	0	0	0
369d2baf54b04f011aa8bec58f0ecafe	AGCTCCAATAGCGTATATTAAAGTTGTTGCAGTTAAAAAGCTCGTAGTTGAATTTCTGGTGGGGACGGCGGTCCGCCGCCTTTGTGTGGTGTGTACTTGCGTGTTCCCTGCCATACTTGTGGAGTGTGTAGGCGGCCCTTAATTTGGGTTGTTTGCATGTGTCTCTGCATCGATTACTGTGAACAAATTAGAGTGTTTAAAGCAGGCTTGTTAGCTTGAATACATTAGCATGGAATAATGATATAGGACTTTGGTGCTATTTCGTTGGTTGTGTACCAAGGTAATGATTAATAGGGATAGTTGGGGGTATTCATATTTGATTGTCAGAGGTGAAATTCTTGGATTTATTAAAGATGAACAACTGCGAAAGCATTTACCAAGGATGTTT	Eukaryota;Stramenopiles;Opalozoa;Bicoecea;Bicoecales;Bicoecaceae;Bicosoeca;Bicosoeca_vacillans;	1	0	0	0	0	0	0	0	0	0	0	0	0	0	0	0	0	0	0	0	0	0	0	0	0	0	0	0	0	0	0	0	0	19	0	0	0	0	0	0	0	0	0	0	37	0	0
36bc43a84cd19e469120ce58248d3b5c	AGCTCCAATAGCGTATATTAAAGTTGTTGCAGTTAAAAAGCTCGTAGTTGAACTTCTGTACATTCCCGATTCCGGCTCTTGTCGAATTGTGGAGTGTGCATCCGCTTACAAACTTAGCCCGGTCTTCATTGGTCGACTAAGGGAGTAGGCCCTTTACTTTGAAAAAATTAGAGTGTTTCAAGCAGGCAATGGCTCGAATACATTAGCATGGAATAATGGAATAGGACTGAGGTCCATTTGGTTGGTTATTGGACTTTAGTAATGATTAACAGGGACAGTTGGGGGCATTAGTACTTAACAGTCAGAGGTGAAATTCTTGGATTTGTTAAAGACTAACTTATGCGAAAGCATTTGCCAAGGATGTTT	Eukaryota;Alveolata;Ciliophora;Oligohymenophorea;Scuticociliatia_1;Philasterida;Metanophrys;Metanophrys_sinensis;	0.999262	0	0	0	0	0	0	0	0	0	0	0	0	0	0	0	0	0	0	0	0	0	0	0	0	0	0	32	0	0	0	0	0	0	0	0	0	0	0	0	0	0	0	0	0	0	0
371baae3d53c3325277583c75a42ea55	AGCTCCAGAAGCGTATGCTAACGTTGTTGCAGTTAAAAAGCTCGTAGTTGAAGGTTTTTCGGTTGGGTCCGTGCGGGCGAACGCCTCGCGGGCCGGCCTTTTTTCTTCTTGGCCCTCTCTTTGGGGGGGCCTCGTTCACTGTAAACAAATTGGAGTGCTCCACGCAGGTCGTTGGGACCTGGACAATTGTTATGGGATGATGAGATAGGGCTCGGGCACTATTTTGTCGGTTTGCATGCCTGGGTAATGGTGAATAGGAACAGTTGGGGATATTCGTATTTAGCGGTCAGAGGTGAAATTCTTGGATTCGGGAAAGACGAACAACTGCGAAGGCATTTATCAAAGATGTTTTCATCGATCAAGAACGAAAG	Eukaryota;Stramenopiles;Sagenista;Labyrinthulomycetes;Thraustochytriales;Thraustochytriaceae;Thraustochytriaceae_X;Thraustochytriaceae_X_sp.;	0.774387	0	0	0	0	0	0	0	0	0	0	0	0	0	0	0	0	0	0	0	0	0	0	0	0	0	0	0	0	0	0	0	14	0	0	0	0	0	0	0	0	0	0	0	0	0	0
3777c018354867da00f123fcd4a86b5a	AGCTCCAGTAGTGTATATCAAAGTTGTTGCGGTTAAAAAGCTCGTAGTTGGATTTCCCGGATAGTTGGGTGTGGGATGTGGTCATTTGAACTGCGGCCATGCCTTTACCGGTGGTTGTGGTCTCCTTCTGGGGGGTCACGGCATGTACTTTGAACAAATTAGAGTGCTCAAGACAGGCGATTTTTTATTGCTGTGAATAGATTAGCATGGAATACGGGTATAAACTCTCTTCTCGGGATTGTTGTTTTGACGAGGAGGGGGAATGATGGATAGGGACAGGTGTGGGCATTGAGATTGTTACGTCAGAGGTGAAATTCTTAGATCGTAGCAGGATTAGCAGACGCGAAAGCATTTGTCAAGGATGTTT	Eukaryota;Apusozoa;Apusomonadidae;Apusomonadidae_Group-2;Apusomonadidae_Group-2B;Apusomonadidae_Group-2B_X;Apusomonadidae_Group-2B_XX;Apusomonadidae_Group-2B_XX_sp.;	1	0	0	0	0	0	0	0	0	0	0	0	0	0	0	0	0	0	0	0	0	82	0	0	0	0	0	0	0	0	0	0	0	0	0	0	0	0	0	0	0	0	0	0	0	0	0
3789794234c28dc2298d30d7f0bec757	AGCTCCAATAGCGTATATTAAAGTTGTTGCAGTTAAAACGCTCGTAGTTGAATCTTGGGTCGGACGGCAGCTGCGGGACAATGTCTTTAGCGGAGGCCGCCGGCCAATATTTTTTCCGGAGTGGTCCGTGTGGCCTTCATTGGCTGTGCGGGGTCACTGCTCCGGACGTTTACTTTGAAAAAATTAGAGTGTTCAAAGCAGGCGTTTTCGCTGTGAATACATTAGCATGGAATAATGGAACAGGACTTTGGTCGTGTTTTGTTGGTTTTAATGGCCGAAGTAATGATTAATAGGGATAGTTGGGGGCATTCGTATTTCGTTGTCAGAGGTGAAATTCTTGGATTTACGAAAGACGAACTACTGCGAAAGCATCTGCCAAGGATGTTT	Eukaryota;Apusozoa;Hilomonadea;Planomonadida;Planomonadidae;Planomonadidae_X;Micronuclearia;Micronuclearia_podoventralis;	0.992906	0	0	0	0	0	0	0	0	0	0	0	0	0	0	0	0	0	0	0	0	0	0	0	0	0	0	0	0	0	0	0	0	0	0	0	0	0	0	0	0	0	0	0	0	0	0
383e0be684a16e958e74a4027e813c7c	AGCTCCAATAGCGTATATTAAAGTTGTTGCAGTTAAAAAGCTCGTAGTTGGATTTGTGGTGTGTGCTGTGGCGTCCATTTGTTTGGTTCTGCCGTGGCCGCGCCATCCTTGGGTGGATTCTGCATGGCATTAGGTTGTCGTGTAGAGGATGCCCATCGCTTACTGTGAAAAAATTAGAGTGTTCAAAGCAGGCTTATGCCGTTGAATATATTAGCATGGAATAATAAGATAGGTCTTGGGTCCTATTTTGTTGGTTTGCGGGCCTTGGAAATGATTAATAGGGACAGTTGGGGGTATTCGTATTCCATTGTCAGAGGTGAAATTCTTGGATTTCTGGAAGACGAACTACTGCGAAAGCATTTACCAAGGATGTTT	Eukaryota;Stramenopiles;Ochrophyta;Bacillariophyta;Bacillariophyta_X;Raphid-pennate	0.998374	0	0	0	0	0	0	0	0	0	0	0	0	0	0	0	0	0	0	0	0	0	0	0	0	0	0	0	0	840	0	0	0	0	0	0	0	0	0	0	0	0	0	0	0	0	0
3846e8fdb649f87367539b69ec4ff2f0	AGCTCCAATAGCGTATATTAAAGTTGTTGCAGTTAAAAAGCTCGTAGTCGTATTTCTTGGCGTGGCGTAGCGTCCGGCGGCACTGCCGCTGTGTATGCCGACGTCCACGCCAATCCTCGTAGAGAGCGTGGCTGGCCTTAACTGGCCGGCCTCGGGATCTGCGTCGTTTACTGTGAAAAAATTAGAGTGTTTAAAGCAGGCATTTTGCTGTGAATACATTAGCATGGAATAATAAGATAGGACTTTGGTGCTATTTTGTTGGTTTGCACACCAGAGTAATGATGAATAGGGACAGTTGGGGGTATTCATATTTAATTGTCAGAGGTGAAATTCTTGGATTACTGAAAGATGAACTTATGCGAAAGCATTTACCAAGGATGTTT	Eukaryota;Stramenopiles;Opalozoa;MAST-12;MAST-12E;MAST-12E_X;MAST-12E_XX;MAST-12E_XX_sp.;	0.997718	0	0	0	0	0	0	0	0	0	0	0	0	0	0	0	0	0	0	0	0	0	0	0	0	0	0	0	0	1	0	0	0	0	0	0	0	0	0	0	0	0	0	0	0	0	0
385a17c667465fb7264bbf2eba02b49c	AGCTCTAATAGCGTATATTAACGTTGTTGATGTTAAAAAGCTCGTAGTTGAAAGTCCGGCCTTTTGGCCTGTCTAGGAGGCTAGAGGATAGAGTTACATCTTTCTTGTAGTTGAACAGACTTTTACTGTGAACAAAATAGAGTGCTTAAAGCAGGCGAAAGCTTGAATATCTTAGCATGGAATAATAGAATATGTATTTATACATTATGTTGGTTTTTGTATAAATAAATGATTAACAGGAACAGTTGGAGATATTAGTATTTAAGTGTTAGAGGTAAAATTCTTAGATCACTTAAAGACTAACTAATGCGAAGGCATTTGTCAAGGATGTTT	Eukaryota;Alveolata;Ciliophora;Phyllopharyngea;Suctoria;Acinetidae_1;Paracineta;Paracineta_limbata;	0.998441	0	0	0	0	0	0	0	0	0	0	0	0	0	0	0	0	0	0	0	0	0	0	0	0	0	0	0	0	0	0	0	0	0	0	0	0	0	0	0	0	0	0	0	0	0	0
386a55fe897b666c5db2c354f97f9f29	AGCTCCAATAGCGTATATTAACTTTGTTGCAGTTAAAAAGCTCGTAGTTGAATTTGTGGCGTTTCCTGTGGTCCAATTTGGTACTAACGGGAGATGCCATCCTTGGGTGGAATCTGTGTGGCATTAGGTTGTCGTGCAGGGGATGCCCATCGTTTACTGTGAAAAAATTAGAGTGTTCAAAGCAGGCTTACGCCGTTGAATATATTAGCATGGAATAATGAGATAGGACCTTGGTACTATTTTGTTGGTTTGCGCACCGAGGTAATGATTAATAGGGACAGTTGGGGGTATTCGTATTCCATTGTCAGAGGTGAAATTCTTGGATTTCTGGAAGACGAACTACTGCGAAAGCATTTACCAAGGATGTTT	Eukaryota;Stramenopiles;Ochrophyta;Bacillariophyta;Bacillariophyta_X;Raphid-pennate;Amphora	0.932168	0	0	0	0	0	0	0	0	0	0	0	0	0	0	0	0	0	0	0	0	0	0	0	0	0	0	0	142	20	0	0	0	0	0	0	0	0	0	0	0	0	0	0	0	0	0
387c02029a16584201e60dd07fca3679	AGCTCCAATAGCGTATATTAAAGTTGTTGCAGTTAAAAAGCTCGTAGTTGAATTTCTGGGTCTGCCGGGCGCCGGCCTTCGGTCGCGTGCCCCGCGGGTTCATCCTCGCCCTTCGGGGCGTCATTTACTGTGAAAAAATTAGAGTGTTTAAAGCAGGCTTAGGCTTGAATACATTAGCATGGAATAATAAGATAGGACCGAGTCGTATTTTGTTGGTTGCGCGAAGCGGTAATGATTAATAGGGACAGTTGGGGGTATTCATATTTAATTGTCAGAGGTGAAATTCTAAGATTTGTTAAAGATGAACTACTGCGAAAGCATTTACCAAGGATGTTT	Eukaryota;Stramenopiles;Opalozoa;Bicoecea;Anoecales;Cafeteriaceae;Pseudobodo;Pseudobodo_tremulans;	0.999999	0	0	0	0	0	0	0	0	0	0	24	17	13	50	0	4	0	0	23	59	0	0	0	61	0	0	0	0	0	0	0	0	101	0	0	0	0	0	0	0	0	0	21	838	0	21
38973b255202207592f34508b22d62a0	AGCTCCAATAGCGTATATTAAAGTTGTTGCAGTTAAAAAGCTCGTAGTTGACTTTCGGGTTTCCGGCGCGTCCACTTCATTGTGGGCTCACGGGGACCCTCCTCGCCTTAGGGCGTCATTTACTGTGAAAAAATTAGAGTGTTCAAAGCAGGCAATCGCTTGAATACATTAGCATGGAATAATAAGATAGGATTTCGTCTATTTTGTTGGTTGCGGACGACAATAATGATTAATAGGGATAGTTGGGGGTGTCCGTATTGAGCTGTCAGAGGTGAAATTCTTGGATTTGCTCAAGACGAACTACTGCGAAAGCATTCACCAAGGATGTTT	Eukaryota;Stramenopiles;Opalozoa;Bicoecea;Anoecales;Caecitellaceae;Caecitellaceae_X;Caecitellaceae_X_sp.;	0.847407	0	0	0	0	0	0	0	0	0	0	0	0	0	0	0	0	0	0	0	0	0	0	0	0	0	0	0	0	0	0	0	0	0	0	0	0	155	205	0	0	0	0	0	0	0	0
38c479c8ce63cadad1ef1b30e5882179	AGCTCCAATAGCGTATATTAAAGTTGTTGCAGTTAAAAAGCTCGTAGTTGGATTTGTGGCGTTCGCGTGCGTCCCGGCATTCGTGCCGGTGTTTGCTAGCGTCGCCATCCTTGGGTGGAACTAGTGTGGCATTAAGTTGTCGTGCTGGGGATGCCCATCGTTTACTGTGAAAAAATTAGAGTGTTCAAAGCAGGCTTATGCCGTTGAATATATTAGCATGGAATAATAAGATAGGACCTTGGTACTATTTTGTTGGTTTGCGCACCAAGGTAATGATTAATAGGGACAGTTGGGGGTATTCGTATTTCATTGTCAGAGGTGAAATTCTTGGATTTTTGAAAGACGAACTACTGCGAAAGCATTTACCAAGGATGTTT	Eukaryota;Stramenopiles;Ochrophyta;Bacillariophyta;Bacillariophyta_X;Raphid-pennate;Nitzschia	0.909143	0	0	0	0	0	0	1	0	0	0	0	0	0	0	0	0	0	0	0	0	0	0	0	0	0	0	0	0	0	0	0	0	0	0	0	0	0	0	0	0	0	0	0	0	0	0
39083d9d5f149281c55835d173da6391	AGCTCCAGTAGCGTATATTAAAGTTGTTGCGGTTAAAAAGCTCGTAGTTGGATTTCAGCCGAGGACGACCGGTCCTGCCTCGCGTAGGAACCTGGTTTGGCCGAGGCATCTCTTGGTGTACGTGATGGCTATTGAGTTAGCTGCACGGACTCCAGGGCATTTACTTTGAGGAAATTAGAGTGTTTCAAGCAGGCATCTGCCTTGAATATATTAGCATGGAATAATAGGATAGGACTTCGGTCCTATTTTGTTGGTTTCTGGGACTGAAGTAATGATTAATAGGGATAGTCGGGGGCATTCGTACTTAACTGTCAGAGGTGGAATTCTTGGATTTGTTAAAGACGAACTACTGCGAAAGCATTTGCCAAGGATGTTT	Eukaryota;Alveolata	0.999138	0	0	0	0	0	0	0	0	0	0	0	0	0	0	0	0	10	0	0	0	0	0	0	0	0	0	0	0	0	0	0	0	0	0	0	0	0	0	0	0	0	0	0	0	0	0
390e18d8783c16fb8cd035431b8a07c8	AGCTCCAATAGCATATATTAAAGTTGTTGCAGTTAAAAAGCTCGTAGTTGGATTTCTGGGAGGAATCCAAAGTCCGTCGCTTGACGTGTGCTGCGGATTCCCCCCATCCTTCTGTTAACGATTCTTGGTATTCATTTACTGGTTTCGGGCTCAGATATTTTACCTTGAGAAAATTAGAGTGTTTCAGGCAGGCTTGCGCCGGAATACATTAGCATGGAATAATAGAATAGGACGTTTTGCTCCTTTGTTGGTTTGAGAGCATAGCGTAATGATTAATAGGGATAGTTGGGGGCATTAGTATTTAATTGTCAGAGGTGAAATTCTCGGATTTGTTAAAGACTAACTTATGCGAAAGCATTTGCCAAGGATGTTT	Eukaryota;Alveolata;Ciliophora;Spirotrichea;Hypotrichia	0.976956	0	0	0	0	0	0	0	0	0	0	0	0	0	0	0	0	0	0	0	0	0	0	0	0	0	0	0	17	0	0	0	0	0	0	0	0	0	0	0	0	0	0	0	0	0	0
3919bbc3a996415730036f245a9b100a	AGCTCCAATAGCGTATATTAAAGTTGTTGCAGTTAAAAAGCTCGTAGTTGAATTTCTAATTAGTTAATATGTAGTTTACTGCTATTAGCTGGTTATCCGACAATGAACCGTGCCGGTTATTAAGTTAACCCCACGGAGAACTGTCATTTTACTTTGAAAAAATTAGAGTGTTTCAGGCAGGCAATTGCCCGAATATCTTAGCATGGAATAATGGAATAGGACTTTGGTTCATTTTATTGGTTATTGAATCAGAGTAATGATTAATAGGGACAGTTGGGGGCATTAGTATTTAATTGTCAGAGGTGAAATTCTTGGATTTATTAAAGACTAACTTATGCGAAAGCATTTGCCAAGGATGTTT	Eukaryota;Alveolata;Ciliophora;Oligohymenophorea;Apostomatia;Foettingeriidae	0.99865	0	0	0	0	0	0	0	0	0	0	0	0	0	0	0	0	0	0	0	0	0	0	0	0	0	0	0	4	0	0	0	0	0	0	0	0	0	0	0	0	0	0	0	0	0	0
3956bc6a7b0a00e246f488470708753d	AGCTCCAATAGCGTATATTAAAGCTGTTGCGGTTAAAAAGCTCGTAGTTGGATTTCTGTCAAGGACAACTGGTCCGCCCTCCGGGTGAGCACATAGTTTGGTCTTGGCATCTTGCTGGAAACTGTTGCTGCGCTTGGTTGTGTGGTGCAGCTTTCAGCACTTTCACTTTGAGGAAATTGGAGTGTTTCAAGCAGGCACATGCCTTTGGACACAGTAGCATGGAATAATTAGATTGGGCTTTTGCTCCAACTTGTTGGTTCCTGGAGCTGAGGTGAGAATCAATGGGGATTGTTGGGGGCATCCGAATTTAGCCGTCAGAGGTGAAATTCTTGGATCTGCTAAAGACGGACAACTGCGAAAGCGTTTGCCCAGGATGTTT	Eukaryota;Alveolata;Dinoflagellata;Dinophyceae;Gymnodiniales;Gymnodiniaceae;Amphidinium;Amphidinium_sp.;	0.999936	0	0	0	0	0	0	0	0	0	0	0	0	0	0	0	0	0	0	0	0	0	0	0	0	0	160	0	0	0	0	0	0	0	187	0	0	0	0	0	0	0	3	0	0	0	0
3968f3dfb464cdc799cf20ac31d67057	AGCTCCAATAGCGTATACTAACGTTGTTGCAGTTAAAAGGCTCGTAGTCGAACTTATGATCCTGTGAACCTGGCCCAACTTCTAGTAAGTTGCGAGCCGGTGTGCACGGATCATTCTTCTGAAGAGCAATGCTACCCTTGATTGGGTTGGTATTGGGATTCAGATCTTTTACTGTGAGTAAATCAAAGTGCTCAAAGCAGGCTTCAATGCTTGTATGGTTCAGCATGGAATAATAAGATAAGACTTGGGTTTTGTTTTGTTGGCTATAACGAACCAAAGTAATGATTGAAAGGGATAGTTGGGGGTGCTAGTATTTAATGGTCAGCGGTGAAATGCGAAGACCCATTAAAGACTAACTTATGCGAAAGCATTCACCAAGGATATCT	Eukaryota;Rhizaria;Cercozoa;Endomyxa;Vampyrellida;Vampyrellida_X;Vampyrellida_clade_B;Vampyrellida_sp.;	0.999998	7	8	0	0	0	0	11	0	0	0	0	0	0	0	0	0	0	0	0	0	0	0	0	0	0	0	0	13	0	0	0	0	0	0	0	0	0	0	0	0	0	0	0	0	0	0
39d4878c3ffbebd92f20ba11c2dac124	AGCTCCAATAGCGTACACTAAAGTTGTTGCAGTTAAAAAGCTCGTAGTCTAATGTATGGGAGTTGCGGTGTGGGTGTTTGGTTGGTTTTGCCGACTAGACAATACTCGCTCCGCTTCCCGCTTGTTTTGCTCTCTTTTAAGAAGGCAAATGTTTCACTGTAAGTAAAACAACTCGCTCAACAGCAAGGTTATCTTGATATGAATTAGTATGGGATGATGAGATAGGCTCGGTCCGTATTTTGTTGGTTTTAGTGGTCTGAGAATGATGAAGAGGGACAATTGGGGGTATTCGTATTTACATGTCAGAGGTGGAATTCTTGGATTTTGGAAAGACGAACTAATGCGAAAGCATCTACCAAAGATGTTT	Eukaryota;Stramenopiles;Sagenista;Labyrinthulomycetes;Thraustochytriales;Thraustochytriaceae;Thraustochytrium;Thraustochytrium_kinnei;	1	0	0	0	0	0	0	0	0	0	0	0	0	0	0	0	0	0	0	0	0	0	0	0	0	0	0	187	0	0	0	0	0	0	0	0	0	0	0	0	0	0	0	0	0	0	0
39d7f857415d2f00c75de5ccb73efe2f	AGCTCCAATAGCGTATATTAAAGTTGCTGCAGTTAAAAAGCTCGTAGTTGGATTTCTGGACACGATTCGTCTCTGGCCGGCCGTGGTTTCACGTGTCTAGTGCTGGAGACTCTGTCCATCCTTCCAATGGCTCCGGCGTCGCTCTTCATTGAGTGTTGCGTTGCGAGTCTTGGATCTTTTACTTTGAAAAAATTAGAGTGTTTCAAGCAGGCTTTTTTGCTATGAATACATTAGCATGGAATAATAATTTAGGACTTCGGTTCTATTTTGTTGGTTTCTAGGACTGAAGTAATGATTGATAGGGACAGTTGGGGGTGCTAGTATTCAGTGGCCAGAGGTGAAATTCTTGGATTCGCTGAAGACTAACTTATGCGAAAGCATTCACCAAGGATGTCT	Eukaryota;Rhizaria;Cercozoa;Filosa-Sarcomonadea;Glissomonadida;Sandonidae;Sandona;Sandona_campae;	0.999999	0	0	0	0	0	0	0	0	0	0	0	0	0	0	0	0	0	0	0	0	0	0	0	0	0	0	0	0	0	43	0	0	0	0	0	0	0	0	0	0	0	0	0	0	0	0
3a3144d4fe2b6d1d312a3d3f7bd8ac7b	AGCTCCAATAGCGTATATTAAAGTTGTTGCAGTTAAAAAGCTCGTAGTTGGATTTCTGGGAGGGTGCCAATGTCCGCCGACGTGCGTGCGCAGCGGCGCCCTTCCATCCTTCTGTTAACGCCTCTTGGGATTCATTTTCTGGTGGCGGGCTCAGATATTTTACCTTGAGAAAATTAGAGTGTTTCAGGCAGGCTTCGCCGGAATATATTAGCATGGAATAATGGAATAGGACTGAGGTCTCTTTGTTGGTTTGAGGGATTTCAGTAATGATTAATAGGGATAGTTGGGGGCATTAGTATTTAACTGTCAGAGGTGGAATTCTCGGATTTGTTAAAGACTAACCTATGCGAAAGCATTTGCCAAGGATGTTT	Eukaryota;Alveolata;Ciliophora;Spirotrichea;Strombidiida;Strombidiidae;Novistrombidium;Novistrombidium_apsheronicum;	0.984362	0	0	0	0	0	0	0	0	0	0	0	0	0	0	0	0	0	0	0	0	0	0	0	0	0	0	0	0	0	0	0	0	0	0	0	0	0	0	0	0	0	0	0	0	0	0
3a4dd9bde23358628d09d1370f112839	AACCCCAAGAGTGTATCTTAATTTTGCTGCAGTTAAAAAGCTCGTAGTTGACTTTCTGATTGGTGAGACCCTCCGGGCGTCTCGCCTTTCATCCGCTTGGAGAAATAGTAGTCAGGTCAAACTGATTATTACAGACCCAGCATTTTACTTTGAAGAAATTAGAGTGTTCCTGGCAGGCCTAGCTGCATATATTAGCATGGGATAATGGAAAAAGACTTGTCTTGTTTTTTTGGTTAACAGATAAGTAATGATTAAAAGGGACAGTCGGGGGCATTCGTACTGAGTGGTCAGAGGTGAAATTCTTAGATTCGCTCAAGACGAACTAATGCGAAAGCATTTGCCAAGGATGTTT	Eukaryota;Alveolata;Ciliophora;Phyllopharyngea;Cyrtophoria_4;Chilodonellidae;Trithigmostoma	0.732394	0	0	0	0	0	0	0	0	0	0	0	0	0	0	0	0	0	0	0	0	0	0	0	0	397	0	0	0	0	0	0	0	0	0	0	0	0	0	0	0	0	0	0	0	0	0
3a4f6eaa4795946900eae428a2e49919	AGCTCCAGAAGCGTATGCTAACGTTGTTGCAGTTAAAAAGCTCGTAGTTGAAGGTTTTTCGGTTGGGTCCGTGCGGGCGAACGCCTCGCGGGCCGGCCTTTTTTCTTCTTGGCCCTCTCTTTGGGGGGGCCTCGTTCACTGTAAACAAATTGGAGTGCTCCACGCAGGTCGTTGGGACCTGGACAATTGTTATGGGATGATGAGATAGGGCTCGGGCACTATTTTGTCGGTTTGCATGCCTGGGTAATGGTGAATAGGAACAGTTGGGGATATTCGTATTTAGCGGTCAGAGGTGAAATTCTTGGATTCGGGAAAGACGAACAACTGCGAAGGCATTTATCAAAGATGTTT	Eukaryota;Stramenopiles;Sagenista;Labyrinthulomycetes;Thraustochytriales;Thraustochytriaceae;Thraustochytriaceae_X;Thraustochytriaceae_X_sp.;	0.805022	0	0	0	0	0	0	0	0	0	66	0	0	0	32	0	68	0	99	0	0	0	0	0	0	0	0	0	0	0	0	0	264	0	0	0	0	0	0	0	0	0	0	0	0	0	0
3a9de03ca231c2194a99b6ad8731f1b9	AGCTCCAATAGCGTATATTAAAGTTGTTGCAGTTAAAAAGCTCGTAGTTGGATTTCTGGTTACTTTGGCCTGGTCCGCCCCGTTAAGGGAGTGAGTACCGGAGCCAGTGGGCCATCCTTCTAGGAAGGGTCTCTACCCTTAATTGGGCCGGAGGCTCGACTTGGATCGTTTACTTTGAAGAAATTAGAGTGTTTAAAGCAGGCTTATTGCTTTGAATATATTAGCATGGAATAATAAGATAGGACTCTGATCCTATTTTGTTGGTTTCTGGGATTAGAGTAATGATTAATAGGGACAGTTGGGGGTGCTGGTATTTAACGGCCAGAGGTGAAATTCTTGGATTCGTTAAAGACCAACTTATGCGAAAGCATTCACCAAGGATGTCT	Eukaryota;Rhizaria;Cercozoa;Filosa-Granofilosea;Cryptofilida;Nanofilidae;Nanofila;Nanofila_sp.;	1	0	0	0	0	0	0	0	0	0	0	0	0	0	0	0	4	0	0	10	17	0	0	0	0	0	0	0	0	0	0	0	0	0	0	0	0	0	0	0	0	0	0	0	0	6	0
3aaf4a06b22e0e98f4fdd22473c9fe68	AGCTCCAATAGCGTATATTAAAGTTGTTGCAGTTAAAAAGCTCGTAGTTGAATTTCGGGCCTCCGCGCTCGGCGCTTCATTGTGCCGTGCCGGGGTCCCTCCTCGCCGTTAGGCGTCATTTACTGTGAAAAAATTAGAGTGTTCAAAGCAGGCAATCGCTTGAATACATTAGCATGGAATAATAAGATAGGATCTTGTCTATTTTGTTGGTTGCGGACAACGATAATGATTAATAGGGATAGTTGGGGGTGTCCGTATTGAGCTGTCAGAGGTGAAATTCTTGGATTTGCTCAAGACGAACTACTGCGAAAGCATTCACCAAGGATGTTT	Eukaryota;Stramenopiles;Opalozoa;Bicoecea;Anoecales;Caecitellaceae;Caecitellus	0.86407	0	0	0	0	0	0	0	0	0	0	0	0	0	0	0	0	0	0	0	0	0	0	0	0	0	0	0	0	0	0	0	0	22	0	0	28	0	0	0	0	0	0	0	19	0	0
3aeec323ac833cab6fb3f1b35b6b424b	AGCTCCAATAGCGTATACTAAAGTTGTTGCAGTTAAAAAGCTCGTAGTTGAATTTCTGGTCGTGGCGATCGGTCCGCTCCTCACGGAGTGTGCACCTGGTCTCTACGTCCATCCTCGGGGAGAGCGCGTCTGGCATTCAGTTGTCGGGCGCGGGATCCTCGTCATTTACTGTGAGCAAAATAGAGTGTTCAAAGCAGGCTTAGGCCGTTGAATACATTAGCATGGAATAATAAGATAGGACCTTGGTCTATTTTGTTGGTTTGCATTCCAAGGTAATGATTAATAGGGATAGTTGGGGGTATTCGTATTCAATTGTCAGAGGTGAAATTCTTGGATTTATGGAAGACGAACTACTGCGAAAGCATTTACCAAGGATGTTT	Eukaryota;Stramenopiles;Ochrophyta;Chrysophyceae;Chrysophyceae_X;Chrysophyceae_Clade-F	0.999885	0	0	0	0	0	0	0	0	0	0	0	0	0	0	0	0	0	0	0	0	15	0	0	0	0	0	0	0	0	0	0	0	0	0	0	0	0	0	0	0	0	0	0	0	0	0
3af18eba6aab63710cac87d5e7c430e0	AGCTCCAATAGTGTATGCTAATGTTGTTGCAGTTAAAAAGCTCGTAGTTGAATTTCTGGTGTGTCTGACCGAGCCTTTGGGCGTATGCTCACTGTTTTGCTTGTTGTTCGGACTGGCCATCTTAGATGTCTGTCAAGGGCATCTTCATTCACTGTAAAGAAAGCAGAGTGTTCAAAGCAGGTTGTAAAATCTGAATGTTTATTATGGGATGATGAGATAGGGCTCGCGCGCTATTTTGTTGGTTTGCACGCGCAAGTAATGGTGGATGGGAACAGTTGGGGCTATTCGTATTTGGCAGCTAGAGGTGAAATTCTTGGATCTGCAAAAGACGAACCAAGGCGAAGGCATTTAGCAAAGATGTTT	Eukaryota;Stramenopiles;Sagenista;Labyrinthulomycetes;Thraustochytriales;Thraustochytriaceae	0.999327	0	0	30	0	0	0	0	0	0	0	0	0	0	0	0	0	0	0	0	0	0	0	0	0	0	0	0	0	0	0	0	0	0	0	0	0	0	0	0	0	0	0	0	0	0	0
3af6b7ea2f048c5ce36ec47d2acf9357	AGCTCCAATAGCGTATATTAAAGTTGTTGCAGTTAAAACGCTCGTAGTTGAATCTCGGGTCGGACGGGACCTGCGGGACGATGTCTTTGCGGGTGTCGACGGCCAATTTTTCCGGAGTGGTCCGTGTGGCCTTAACTGGCTGTGCGGAGCCACCGCTCCGGACGTTTACTTTGAAAAAATTAGAGTGTTCAAAGCAGGCGTTTTCGCTGTGAATACATTAGCATGGAATAATGGAACAGGACTTTGGTCGTGTTTTGTTGGTTTTAATGGCCGAAGTAATGATTAATAGGGATAGTTGGGGGCATTCGTATTTCGATGTCAGAGGTGAAATTCTTGGATTTTCGAAAGACGAACTACTGCGAAAGCATCTGCCAAGGATGTTT	Eukaryota;Apusozoa;Hilomonadea;Planomonadida;Planomonadidae;Planomonadidae_X;Micronuclearia;Micronuclearia_podoventralis;	0.998913	0	0	0	0	0	0	0	0	0	0	0	0	0	0	0	0	0	0	0	0	0	0	0	0	0	0	0	0	0	0	0	0	0	0	0	0	0	0	0	0	0	0	0	0	0	0
3b07c6329b4f8ad1a41f6f4419b839d6	AGCTCCAATAGCGTATATTAAAGTTGTTGCAGTTAAAAAGCTCGTAGTTGGATTTCTGAATCGAATGTCCGGTCCGCTTGTTTCATACAAGTGCGTACTATGTGATATTTGTTTCATTTTTTGTGAGGAAATTTTTCTGTCATTAAGTTGGTGGAATTATGGACTTGCATCTTTTACTGTGAAAAAATTAGAGTGTTTAAAGCAGGCGTTTGCCATTGAATACATTAGCATGGAATAATAAGATATGACTTTGGTGGTCTATTTTGTTGGTTTGCACACCAGAGTAATGATTAATAGGGACAGTTGGGGGTATTCATATTTCAGCGTCAGAGGTGAAATTCTTAGATCGCTGAAAGATGAGCTTAGGCGAAAGCATTTACCAAGGATGTTT	Eukaryota;Stramenopiles;Pseudofungi;Oomycota;Oomycota_X;Haliphthorales;Haliphthoros;Haliphthoros_sp.;	0.999998	0	0	0	0	0	0	0	0	0	0	0	0	0	0	0	0	0	0	0	0	0	0	0	0	0	0	0	0	0	0	0	0	3	0	0	0	0	0	0	0	0	0	0	0	0	0
3b396f3df5881588211dcd3e98e784a6	AGCTCTGATAGTGTATACTAACGTTGTTGCAGTTAAAAGGCTCGTAGTCGAACTTCTGATCTTGTGCGCGAATCCCTCTGCCAAAGCGCAGTGGTGTTTCTTGCGCACAGGTCATCCTTCTGGAGGAACCATCTGCACTTGATTGTGTTGGGTGTGGAATCCAGATCATTTACTGTGAGTAAATCAGAGTGTTTAAAGCAGGCTTTATGCCTGAATGTTCTAGCATGGAATAATAAGATAGGACTTTGGTTCTATTTTGTTGGCTTCTAGGACTAAAGTAATGATTGATAGGGACAGTTGGGGGTGCTAGTATTTAACGGTCAGCGGTGAAATGCGTGGACCCGTTAAAGACTAACTTATGCGAAAGCATTCACCAAGGATGTCT	Eukaryota;Rhizaria;Cercozoa;Endomyxa;Vampyrellida;Sey055-lineage;Sey055-lineage_X;Sey055-lineage_X_sp.;	0.999997	0	0	0	0	0	0	0	0	0	0	0	0	0	0	0	0	0	0	0	0	0	0	0	0	0	0	0	0	0	0	0	0	0	0	0	0	0	0	0	0	0	0	0	0	0	0
3b7181a5b3372532cdd2117b8499aed4	AGCTCCAATAGTGTATCTTAATGTTGTTGCTGTTAAAAAGCTCGTAGTTGAATTTCTGGCCATCTAGCTAAGCCATGTGCGAGGCAGGAAGGTCATCCGCGTTGAAAGTACGTATGCTGAATAAGCTGCGTGTAGAAGGCGTATTTTACTTTGAAGAAATTAGAGTGTTCCAGGCAAGCGATGCTTGAATATTACAGCATGGAATAATGGAATAGGACTATCCTTTTTTGTTGGTTAAAGGATCAGTAATGATTAACAGGGACAGTTGGGGGCATTCGTACTGGGCAGTCAGTGGTAAAATACGATGACCTGCTCAAGACGCACTAATGCGAAGGCATTTGCCAAGGATGTTT	Eukaryota;Alveolata;Ciliophora;Phyllopharyngea;Cyrtophoria_7;Hartmannulidae;Heterohartmannula;Heterohartmannula_fangi;	0.999193	0	0	0	0	0	0	0	0	0	0	0	0	0	0	0	0	0	0	0	0	0	0	0	0	0	0	0	0	0	0	0	0	0	18	0	0	0	0	0	0	0	0	0	0	0	0
3be937275f15c9060c504c8700467baa	AGCTCCAATAGCGTATATTAAAGTTGTTGCAGTTAAAAAGCTCGTAGTTGGATTTCTGGTAGGAGCGACCATGCCGGGCTTGATTGTCCGTGCACTGTGTTGTCTCCAGCCATCCTCGTGGAGAACTTTTCTGGCATTAACTTGTCGGGATGGGGACCCGCGTCGTTTACTGTGAAAAAATTAGAGTGTTTAAAGCAGGCAATTGGCTTGAATACATTAGCATGGAATAATAAGATAGGACTTTGGTGCTATTTTGTTGGTTTGCACACCAAGGTAATGATTAACAGAATCAGTCGGGGATATTCGTATGCAAATGTCAGAGGTGAAATTCTTGGATTTTTTACAGACGAACTACTGCGAAAGCATTTATCAAGGATGTTTTCATCAATCAAGAACGAAG	Eukaryota;Stramenopiles;Sagenista;Labyrinthulomycetes;Labyrinthulales;Labyrinthulaceae;Labyrinthulaceae_X;Labyrinthulaceae_X_sp.;	0.906557	0	0	0	0	0	0	0	0	0	0	0	0	0	0	0	0	0	0	0	0	0	0	0	0	0	0	0	0	0	0	0	0	0	0	0	3	0	0	0	0	0	0	0	0	0	0
3bef8c3bf097def54373791fb4c70c20	AGCTCCAATAGTGTATCTTAATGTTGTTGCAGTTAAAAAGCTCGTAGTTGAATTTCTGGCCGGGGGAACCGCACATGTGTGGAGCCCCTGGTCATCCGGCCTGGAAGGGATACTTGTACTTTATTGGACGGTACCTAGAAGGGTCATTTTACTTTGAAGAAATTAGAGTGTTCCAGGCAGGCCTTGCTTGAATACATCAGCATGGAATAATGGAAAAGGACAGCGTCCATTTTATTGGTTATTGGAGGTTGTAATGATTAACAGGGACAGTTGGGGGCATTCGTATTCATTAGTCAGAGGTGAAATTCTTGGATTTGATGAAGACGAACTACTGCGAAAGCATTTACCAAGGATGTTTTCATTAATCAAGAACGAAAG	Eukaryota;Alveolata;Ciliophora;Phyllopharyngea	0.995374	0	0	0	0	0	0	0	0	0	0	0	0	0	0	0	0	0	0	0	0	0	0	0	3	0	0	0	0	0	0	0	0	0	0	0	0	0	0	0	0	0	0	0	0	0	0
3bf79dc4fe5aac3ebe6d9233304ed186	AGCTCCAATAGCGTATATTAAAGTTGTTGCAGTTAAAAAGCTCGTAGTTGACCTTCTGTACATTCCCGATTCTGGCTTCGGTCAAGTTGTGGAGTGTACATCCGCTTGCAAATCTAGTTCGGCATTCACTTGTTGGCTAGGGGAGTAAGCTTTTTACTTTGAAAAAATTAGAGTGTTTCAGGCAGGCAATTGTTTGTATACATTAGCATGGAATAATGGAATAGGACTTTTGTCCATTTGATTGGTTATTGGACATGAGTAATGATTAAAAGGGACAGCTGGGGGCATTAGTACTTAATTGTCAGAGGTGAAATTCTTGGATTTATTAAAGACTAACTTATGCGAAAGCATTTGCCAAGGATGTTT	Eukaryota;Alveolata;Ciliophora;Oligohymenophorea;Scuticociliatia_1;Philasterida;Uronema;Uronema_nigricans;	0.999732	0	0	0	0	0	0	0	0	0	0	0	0	0	0	0	0	0	0	0	0	0	0	0	0	0	0	0	0	0	0	0	0	0	0	0	0	0	0	337	532	0	236	0	0	0	0
3bf8fbde6ba018121b653acd070e577d	AGCTCCAATAGCGTATATTAAAGTTGTTGCAGTTAAAAAGCTCGTAGTTGGATTTCTGGTTGCATGCTTGGACCTACTGATGTAGTGGACGAGGTGCTTCCATCCTTCTGTTAACCACCGTTCCTTCAAAAGTTCGGTCGGGGCTCAGATATTTTACCTTGAGAAAATTAGAGTGTTTCAGGCAGGCTAGCGCCGGAATACATTAGCATGGAATAATAGAATAGGACTTTTACCTCTTCTGTTGGTCTGAGGGGTTAAAGTAATGATTAATAGGGATAGTTGGGGGCATTGGTACTTAGCTGTCAGAGGTGAAATTCTCGGATTTGTTAAAGACCAACTTATGCGAAAGCATTTGCCAAGGATGTTT	Eukaryota;Alveolata;Ciliophora;Spirotrichea;Choreotrichida;Choreotrichida_X;Choreotrichida_XX;Choreotrichida_XX_sp.;	0.999987	0	0	0	0	0	0	0	0	0	0	0	0	0	0	0	0	0	0	0	0	0	0	0	0	0	0	0	0	0	0	0	0	0	0	0	0	0	0	0	0	0	0	0	0	0	0
3c336977037fb37c43b2a94978ba0151	AGCTCCAATAGCGTATATTAAAGTTGTTGCAGTTAAAAAGCTCGTAGTTGAATTTCTGTCTCTAAAGACTCCAGTCAATTGATTAAGAGTTCTTTAAGACATTTTCTCACGATGATATTAGTCGTGAGACCTTCACTTTGAGAAAATTAGAGTGTTTCAAGCAAGCTATATGCTTTGAATACTACAGCATGGAATAATACAATAGGACTTTAGACCTATTTGTTGGTTTCTAGGTTTGGAGTAATGATTAATAGGGACAGTTGGGGGCATTTGTATTTGATAGTCAGAGGTGAAATTCGTGGATTTATCAAAGACAAACTACTGCGAAAGCATTTGCCAAGGATGTTT	Eukaryota;Alveolata;Apicomplexa;Colpodellidea;Colpodellida;Colpodellaceae;Colpodella;Colpodella_sp.;	1	0	0	0	0	0	0	0	0	0	0	0	0	0	0	0	0	0	0	0	0	0	0	0	0	0	0	0	0	0	6	0	0	0	0	0	0	0	0	0	0	0	0	0	0	0	0
3c6e3fa2caad588cb3b831bb95ad604a	AGCTCCAATAGCGTATATTAAAGTTGTTGCAGTTAAAAAGCTCGTAGTTGAACTTCTGTACAGTCTCATTTCTGGCTTAGGTCAAGATGTTGGCTGTGCATCCGCTTGCAAAGCTGGTTCGGCCTTAACTGGTCGGCTAGTAGAGTAAGCCCTTTACTTTGAAAAAATTAGAGTGTTTCAGGCAGGCAATGGCTCGAATACATTAGCATGGAATAATGGAATAGGACTTTTGTCCATTTGGTTGGTTATTGGACTTAAGTAATGATTAACAGGGACAGTTGGGGGCATTAGTATTTAATTGTCAGAGGTGAAATTCTTGGATTTATTAAAGACTAACTTATGCGAAAGCATTTGCCAAGGATGTTT	Eukaryota;Alveolata;Ciliophora;Oligohymenophorea;Scuticociliatia_1;Philasterida;Uronema;Uronema_marinum;	0.925575	0	0	0	0	0	0	0	0	0	0	0	0	0	0	0	0	0	0	0	0	66	0	0	0	2	0	47	0	0	0	0	0	3	0	0	0	0	0	0	1	0	0	1	0	0	62
3cb68dd3862121aed8117cfb51f1b5fd	AGCTCCAATAGCGTATATTTAAGTTGTTGCAGTTAGAAAAGGCTCGTAGTTGGATTTCTGGAGGTGGCGACAGGCGCGTGGTCAAGGCTACGCCCAGTCTACTCCTTCATCCTTCTGTTAACGTTGCTCGGCATTCAGTTGTCGACTTCGGGCTCAGATACTTTACCATTTTATTTTCTTTGAGCAAATTAGAGTGTTTCAGGCAGGCGTGCGCCGGAATACATTAGCATGGAATAATCGAACAGGACCGTGTTCCTTTTGTTGGTTTCTAAGGGCATGGTAATGATTAATAGGGATAGTTTATTTAAAGGGGTGGCATTAGTATTTAAGATTCAGAGGTGAAATTCTTTGACATAATTAAAGACTAACTTATGCGAAAGCATTTGTCAAGAATGTTT	Eukaryota;Alveolata;Ciliophora;Spirotrichea;Euplotia;Euplotidae;Euplotes;Euplotes_sinicus;	1	0	0	0	0	0	0	0	0	0	0	0	0	0	0	0	0	0	0	0	0	0	0	0	0	0	0	0	0	0	0	0	0	0	0	0	0	0	0	0	0	0	0	0	0	0	0
3cca7c19520c40ea28659e6257d8ee10	AGCTCCAATAGCGTATATTAAAGTTGTTGCAGTTAAAAAGCTCGTAGTTGGATTTTTGGCGGATGCCGCTGTCCAATTAGGTACAAGCGGTGGCTGTCATGTTTGAGTGGAGTTTGTCTGGCATTAGGTTGTCGGGCAGAGGAGACTCATCGTTTACTGTGAAAAAATTAGAGTGTTCCAAACAGGCATATGCCGTTGAATATATTAGCATGGAATAATGAGATAGGACTTTGGTACTATTTTGTTGGTTTGCGCACCGAAGTAATGATTAACAGGGACAGTTGGGGGTATTCGTATTCCATTGTCAGAGGTGAAATTCTTGGATTTCTGGAAGACGAACTACTGCGAAAGCATTTACCAAGGATGTTT	Eukaryota;Stramenopiles;Ochrophyta;Bacillariophyta;Bacillariophyta_X;Raphid-pennate	0.929173	0	0	0	0	0	0	0	0	0	0	0	0	0	0	0	0	0	0	0	0	0	0	0	0	0	0	0	0	0	0	0	0	0	0	0	0	0	0	0	0	0	0	0	0	0	0
3cdf0d2f4b023205e65169a73980257b	AGCTCCAATAGCGTATATTAATGTTGTTGCAGTTAAAAAGCTCGTAGTTGGATTTGTGGTTGGAGCGTTCGGTCCGACACAGTGTGTGGGTACTTGATCGTTCCGTCCATCTTTGGTTTGAATCTTCGTGGCATTAAGTTGTCGTGGAGGGGAGGGCCATCATTTACTGTGAAAAAATCAGAGTGTTCAAAGCAGGCTTATGCCGTTGAATATATTAGCATGGAATAATGAGATAGGACCTTGGTACTATTTTGTTGGTTTGCGCACCGAGGTAATGATTAATAGGGACAGTTGGGGGTATTCGTATTCCATTGTCAGAGGTGAAATTCTTGGATTTCTGGAAGACGAACTACTGCGAAAGCATTTACCAAGGATGTTT	Eukaryota;Stramenopiles;Ochrophyta;Bacillariophyta;Bacillariophyta_X;Araphid-pennate;Licmophora;Licmophora_gracilis;	0.997331	0	0	0	0	0	0	0	0	0	0	0	0	0	0	0	0	0	0	0	0	0	0	0	0	16	16	0	0	19	0	16	60	0	0	0	0	0	0	0	0	0	0	0	0	0	0
3ce1b63650f9b3e7fa04fe0f7d129b8d	AGCTCCAAGAGCGTATATTAAAGTTGTTGCAGTTAAAAAGCTCGTAGTTGAATTTTGGGGTGGCCCCAGGAGGTCCACTTATTTGTGAGTACTTTTTGGGACCGCCCTTCCATGGCTTAATCCCTTTTTGAGAGGGTGGGCCATAATTACTTTGAGTAAATGAGAGTGTTCAAAGCAGGCAAGCGCTTGAATCTTTTAGCATGGAATAATAAAATAGGACGATGATTCTATTTTGTTGGTTTCTAGGACCATCGTAATGATTAATAGGGACGGTCGGGGGCATTAGTATTCAGTTGTAAGAGGTGAAATTCTTAGATTTTCTGAAGACTAACTACTGCGAAAGCATTTGTCAAGGACGTTT	Eukaryota;Opisthokonta;Fungi;Ascomycota;Saccharomycotina;Saccharomycetales;Metschnikowia	0.99802	0	0	0	0	0	0	0	0	0	0	0	0	0	0	0	0	0	0	0	0	0	0	0	0	0	0	0	0	0	0	0	0	0	0	0	0	228	385	0	0	0	0	0	0	0	0
3ceef38cd9e58c3faa0fb1ace4b72cc5	AGCTCCAATAGCGTATATTTAAGTTGTTGCAGTTAGAAAAGGCTCGTAGTTGGATTTCTGGAGGTGGCGACAGGCGCGTGGTCAAGGCTACGCCCAGTCTACTCCTTCATCCTTCTGTTAACGTTGCTCGGCATTCATTTGTCGACTTCGGGCTCAGATATTTTACCATTTTTATTTTTGAGCAAATTAGAGTGTTTCAGGCAGGCGTGCGCCGGAATACATTAGCATGGAATAATCGAACAGGACCGTGTTCCTTTTGTTGGTTTCTAAGGGCATGGTAATGATTAATAGGGATAGTTTATTTAAAGGGGTGGCATTAGTATTTAAGATTCAGAGGTGAAATTCTTTGACATAATTAAAGACTAACTTATGCGAAAGCATTTGTCAAGAATGTTT	Eukaryota;Alveolata;Ciliophora;Spirotrichea;Euplotia;Euplotidae;Euplotes;Euplotes_sinicus;	1	0	0	0	0	0	0	0	0	0	0	0	0	0	0	0	0	0	0	0	0	0	0	0	0	0	0	0	0	0	0	0	0	0	0	0	0	0	0	0	0	0	0	0	0	0	0
3cef72ace70b2d8b06c589ee6d4c3fd1	AGCTCTGATAGTGTATACTAACGTTGTTGCAGTTAAAAGGCTCGTAGTCGAACTTCTGATCTTGTGCGCGAATCCCTCTGCCAAAGCGCAGTGGTGTTTCTTGCGCACAGGTCATCCTTCTGGAGGAATCATCTGCACTTGATTGTGTTGGGTGTGGAATCCAGATCATTTACTGTGAGTAAATCAGAGTGTTTAAAGCAGGCTTTATGCCTGAATGTTCTAGCATGGAATAATAAGATAGGACTTTGGTTCTATTTTGTTGGCTTCTAGGACTAAAGTAATGATTGATAGGGACAGTTGGGGGTGCTAGTATTTAACGGTCAGCGGTGAAATGCGTGGACCCGTTAAAGACTAACTTATGCGAAAGCATTCACCAAGGATGTCT	Eukaryota;Rhizaria;Cercozoa;Endomyxa;Vampyrellida;Sey055-lineage;Sey055-lineage_X;Sey055-lineage_X_sp.;	0.999997	0	0	0	0	0	0	0	0	0	0	0	0	0	0	0	0	0	0	0	0	0	0	0	0	0	0	0	10	0	0	0	0	0	0	0	0	0	0	0	0	0	0	0	0	0	0
3d84e9f31726b419c34575d84baef054	AGCTCCAGTAGCGTATATTAAAGTTGTTGCAGTTAAAAAGCTCGTAGTTGGATTTCTGGCTTGAGACGCCTGAGCCGCCAGGGTTACCTGTGTGAGTCTCGGTGTGTCTCTGCCATCCTTCTGGATAGCGTGTCTACCTTTTATTAGGCCGGGCTCGTGCTCCAGATCTTTTACTTTGAAAAAATTAGAGTGTTTAAAGCAAGCTTGCGCTATGAATACATTAGCATGGAATAATAATTTAGGACTTTGGTTCTATTTTGTTGGTTTCTAGGACTGAAGTAATGATTGATAGGGATAGTTGGGGGTGCTAGTATTCAGCGGCCAGAGGTGAAATTCTTGGATTCGCTGAAGACTAACTTATGCGAAAGCATTCACCAAGGATGTCT	Eukaryota;Rhizaria;Cercozoa;Filosa-Thecofilosea;Filosa-Thecofilosea_X;Filosa-Thecofilosea_XX;Filosa-Thecofilosea_XXX;Filosa-Thecofilosea_XXX_sp.;	0.999983	0	0	0	0	0	0	0	0	0	0	0	0	0	0	0	0	0	0	0	0	0	0	0	0	0	0	0	0	0	0	0	0	0	0	0	0	0	0	0	0	0	0	0	4	0	0
3db6b7ce0bc1d8d4f40ae2f976cb4aa0	AGCTCCAATAGCGTATATTAAAGTTGTTGCGGTTAAAAAGCTCGTAGTTGGATTTCTGCTGAGGACGACCGGTCCGCCCTCTGGGTGAGTATCTGGCTCGGCCTGGGCATCTTCTTGGAGAACGTAGCTGCACTTGACTGTGTGGTGCGGTATCCAAGACCTTTACTTTGAGGAAATTAGAGTGTTTCAAGCAGGCACACGCCTTGAATACATTAGCATGGAATAATAAGATAGGACCTTGGTTCTATTTTGTTGGTTTCTAGAGCTGAGGTAATGATTAATAGGGATAGTTGGGGGCATTCGTATTTAACTGTCAGAGGTGAAATTCTTGGATTTGTTAAAGACGGACTACTGCGAAAGCATTTGCCAAGGATGTTT	Eukaryota;Alveolata;Dinoflagellata;Dinophyceae;Peridiniales;Thoracosphaeraceae	0.859426	0	0	0	0	0	0	0	0	0	0	0	0	0	0	0	0	0	0	0	0	0	0	0	0	0	0	0	0	0	0	0	0	0	0	0	0	45	15	0	0	0	0	0	0	0	0
3dd4672051d4401c4540577bec317fea	AGCTCCAATAGCGTATATTAAAGTTGTTGCGGTTAAAAAGCTCGTAGTTGGATTTCTGCTGAGGATGACTGGTCCGCCCTCTGGGTGAGTATCTAGCCTATCCTTGGCATCTTCCTGAAGAACGTAGCTGCACTTGACTGTGTGGTGCGGTATTTAGGACATTTACTTTGAGGAAATTAGAGTGTTTCAAGCAAGCGCACGCCTTGAATACATTAGCATGGAATAATAAGATAGGACCTCGGTTCTATTTTGTTGGTTTCTAGAGCTGAGGTAATGATTGATAGGGATAGTTGGGGGCATTCGTATTTAACTGTCAGAGGTGAAATTCTTGGATTTGTTAAAGACGGACTACTGCGAAAGCATTTGCCAAGGATGTTT	Eukaryota;Alveolata;Dinoflagellata;Dinophyceae;Suessiales;Suessiaceae;Ansanella;Ansanella_granifera;	0.96638	0	0	0	0	0	0	0	0	0	0	0	0	0	0	0	0	0	0	0	0	0	0	0	0	0	0	0	3	0	0	0	0	0	0	0	0	0	0	0	0	0	0	0	0	0	0
3de4ed8c53591c11b7ec8aa832252203	AGCTCCAATAGCGTATATTAAAGTTGTTGCAGTTAAAAAGCTCGTAGTTGAACTTCTGTACGTGCTCTGTTCTGGCTCCGGTCAAGCAGTAGCGCGTGCATCCGCTTGCAAACTAGTCTCGTCCTTAACTGGTCGTTCTAGGGAGTAAGCCCTTTACTTTGAAAAAATTAGAGTGTTTCAGGCAGGCAATGGCTCGAATACATTAGCATGGAATAATGGAATAGGACTTTTGTCCATTTGGTTGGTTATTGGACTTAAGTAATGATTAACAGGGACAGTTGGGGGCATTAGTATTTAATTGTCAGAGGTGAAATTCTTGGATTTATTAAAGACTAACTTATGCGAAAGCATTTGCCAAGGATGTTT	Eukaryota;Alveolata;Ciliophora;Oligohymenophorea;Scuticociliatia_1;Cohnilembidae;Cohnilembus;Cohnilembus_verminus;	0.994733	0	0	0	0	0	0	0	0	0	0	0	0	0	0	0	0	0	0	0	0	0	0	0	0	0	0	0	0	0	0	0	0	0	0	0	0	0	0	0	0	0	0	91	0	0	83
3e2fe4162c3bb8b3ecf63595f9ebd75e	AGCTCCAATAGCGTATGCTAAAATTGTTGCGGTTAAAACGCTCGTAGTTGTACGTTCCTCCAGGGCACTCGGATTTTTCGTACAGAAGGTTCCGAGTGGTCTGTGAAATTATCTTACAAAGCGGTCTCTTGCTGAGCACGCGGAAAGGGATACTTGTACCTTGAAGAAATTAGAGTGCTTCAAGCAGATTATTGTCTGAATATTATAGCATGGAATAGTTGGAGAAGATACTGGTTCTATTAGAGATTTGTAGAGCAGGTGTAATAGTTGAGAGGAACAGAAGGGGGCATTCATATTCGCATGTGAGAGGTGGAATTCTTGGATCTTGCGAAGGTGGACTACTGCGAAAGCATTTGTCAAGAATGTTT	Eukaryota;Alveolata;Alveolata_X;Alveolata_XX;Alveolata_XXX;Alveolata_XXXX;Alveolata_XXXXX;Alveolata_XXXXX_sp.;	1	95	93	129	0	236	199	0	0	88	0	0	0	0	0	0	11	0	7	0	0	0	0	0	0	0	0	0	0	0	0	0	0	0	0	0	0	0	0	0	0	0	0	0	0	0	0
3e57d09fc0c267961f2f83fc152c93b2	AGCTCCAATAGCGTATACTAAAGTTGTTGCAGTTAAAAAGCTCGTAGTTGAATTTCTGGTCTCGGACATCGGTCTGCCTCGAACGAGGTACGTACCAGTTGTCTGAATCCATCCTCGGGGAAAACATATCTGTCATTCAGTTGATGGGTATGGGATCCTCGTCATTTACTGTGAGCAAAATAGAGTGTTCAAAGCAGGCTTATGCCGTTGAATACATTAGCATGGAATAATAAGATAAGACCTTGGTCTAATTTTGTTGGTTTGTACTCCAAGGTAATGATTAATAGGGATAGTTGGGGGTATTCGTATTCAATTGTCAGAGGTGAAATTCTTGGATTTATGGAAGACGAACTACTGCGAAAGCATTTACCAAGGATGTTT	Eukaryota;Stramenopiles;Ochrophyta;Chrysophyceae;Chrysophyceae_X;Chrysophyceae_Clade-C	0.999463	0	0	0	0	0	0	0	0	0	0	0	0	0	0	0	0	0	0	46	233	0	0	0	0	0	0	50	0	0	0	0	0	0	0	0	0	0	0	0	0	0	0	0	0	0	0
3e73918dcb0a86e807e7e6fa58a25ef9	AGCTCCAGTAGTGTATATCAAAGTTGTTGCGGTTAAAAAGCTCGTAGTTGGATTTCCCGGCAAAATAAGGTGCGGGATGTGGTCATTTGAACTGCGGCCGTGTCTTTTCCGGTGGTTGTGGTCTCCTTGTGGGGGGTTGCGGCATGTACTTTGAACAAATTAGAGTGCTCAAGACAGGCGATTTTTTATTGCTGTGAATAGATTAGCATGGAATACGGGTATAAACTCTCTTCTCGGGATTGTTGTTTTGACGAGGAGGGGGAATGATGGATAGGGACAGGTGTGGGCATTGAGATTGTTACGTCAGAGGTGAAATTCTTAGATCGTAGCAGGATTAGCAGACGCGAAAGCATTTGTCAAGGATGTTT	Eukaryota;Apusozoa;Apusomonadidae;Apusomonadidae_Group-2;Apusomonadidae_Group-2B;Apusomonadidae_Group-2B_X;Apusomonadidae_Group-2B_XX;Apusomonadidae_Group-2B_XX_sp.;	1	0	0	0	0	0	21	0	0	0	0	290	508	0	0	0	0	0	0	0	0	0	0	0	0	0	0	0	0	0	0	0	0	0	0	0	0	0	0	0	0	0	0	0	0	0	0
3e8b0b14651c67e2715b40cf9ecaab3b	AGCTCCAATAGTGTATACTAATGTTGCTGCAGTTAAAAAGCTCGTAGTTGGATTTCGGTTAATAGGTTGCTAGTCTACTTTTTTATAAGTACGCACTGTCATCCTATTTCCTTCTTTTCAGTAACAAAATTTATTTTGTTCTGAATTATTTACTTTGAAAAAATTAGAGTGTTCAAATCAGGCGTATTTTGCCTTTGAATATATTAGCATGGGATAATGAAATAAGACTTTTTGCCTTATTCTCGTTGGTTTTTGAGGCTAAAGTAATGATTAATAGGGATAGTTGGGGTCATTAGTATTTAATTGTCAGAGGTGAAATTCTAAGATTAATTAAAGACTAACTACTGCGAAAGCATTTGACAAGGATGTTT	Eukaryota;Amoebozoa;Lobosa;Tubulinea;Leptomyxida;Flabellulidae;Paraflabellula;Paraflabellula_hoguae;	0.818503	0	0	0	0	0	0	0	0	0	0	0	0	0	12	0	0	0	0	0	0	0	0	0	0	0	0	0	0	0	0	0	0	0	0	0	0	0	0	0	0	0	0	0	0	0	0
3e9288836739bd4db079d72c462185b0	AGCTCCAATAGCGTATATTAAAGTTGTTGCAGTTAAAAAGCTCGTAGTCGGATTTCTGGCGCCGTTGCGTGGTCCGCCGAAAGGTGTGTACTGCGTGTCGGTGCCTTTCCTCCCGACGCCTCCGTGTGCCCTTAACTGTGGTGTGCGGGTGGCTCGGGACCTTTACTTTGAAAAAATTAGAGTGTTCAAAGCAGGCCTTTGCTTGAATACATTAGCATGGAATAATGGAATAGGACTTTGGTTCTATTTTGTTGGTTCTAGGACCGAAGTAATGATTAATAGGAATGGTTGGGGGCATTAGTATTTAATTGTCAGAGGTGAAATTCTTAGATTTATGAAAGACTAACTACTGCGAAAGCATTTGCCAAGGATGTTTTCATTAATCAAGAACGAA	Eukaryota;Opisthokonta;Choanoflagellida;Choanoflagellatea;Craspedida;Monosigidae_Group_M;Salpingoeca_M;Salpingoeca_urceolata;	0.941399	0	0	0	0	0	0	0	0	0	0	0	0	0	0	0	0	0	0	0	0	0	0	0	0	0	0	0	3	0	0	0	0	0	0	0	0	0	0	0	0	0	0	0	0	0	0
3ebab20c808913a53c8c2bb45d2672a6	AGCTCCAATAGTGTATATTAATGTTCCTGCAGTTATTCGATGCTCGTAGTTGGATTTCTGGAGGTTGCGACAGGAGGGTGGCTATGGCCGCCGCCGGTCGCCTCCTTCATCCACCTGTTAACGTCGTCCGGGATTCATTTCTCGGCTTCGGGCTCAGGTACTTTACCCTTTCTATATAATATTCATTTATTCATCTTCTTTTTGAGCAAATTATAGTGTTTCAGGCAGGCGTGCGCCGGAATACCTTAGCATGGAATAATCGAACTGGACCGTGTATCCATCTTTGTTGGTTTGAGAGACACGGAAATGGTTAATAGGGATAGTACTTTTCAGGGGAGGCATTAGTATTTAATTTCCAGAGGTGAAATTCTTTGAAATATTAAAGACTAACTTATGCGA…	Eukaryota;Alveolata;Ciliophora;Spirotrichea;Euplotia;Euplotidae;Euplotes;Euplotes_euryhalinus;	0.877719	0	0	0	0	0	0	0	0	0	0	0	0	0	0	0	0	0	0	0	0	21	0	0	0	0	0	36	0	0	0	0	0	0	0	0	0	0	0	0	0	0	0	0	0	0	0
3ec7cd69a4ed6f8bbd836bdbab117e91	AGCTCCAAGAGCGTATATTAAAGTTGTTGCAGTTAAAAAGCTCGTAGTTGGATTTCTGGTGTAATGCGCCTGGCCCGTGGTCGTAAGGCTTATGTGTGCCGGTGCGCGTTCACCATCCTTCTAGTAAACGTTTCTACCCTTAACTGGGCCGGATTCGCGAACTAGATCTTTTACTTTGAAAAAATTAGAGTGTTTAAAGCAGGCTTTTGCTATGAATACATTAGCATGGAATAATAATCTAGGACTTCGGTTCTATTTTGTTGGTTTCTAGTACTGGAGTAATGATTGATAGGGATAGTTGGGGGTGCTAGTATTGGCCGGCCAGAGGTGAAATTCTTGGATTCGGTCAAGACTAACTTATGCGAAAGCATTCACCAAGGATGTCT	Eukaryota;Rhizaria;Cercozoa;Filosa-Thecofilosea;Cryomonadida;Protaspa-lineage;Protaspa-lineage_X;Protaspa-lineage_X_sp.;	0.993824	0	0	0	0	0	0	0	0	0	0	0	0	9	23	4	0	0	0	0	15	0	0	0	0	0	0	0	0	0	0	0	0	0	0	0	0	0	0	0	0	0	0	0	0	0	0
3ee139e7332361f392ae586563dd6210	AGCTCCAAAAGGATATATCAACGTTGTTGCAGTTAAAAAGCTCGTAGTTGAATTTCGGGTGGGAATGATGTTGCGCTTTTAGAGGATGTAAATCCACTTGAAGTGTGGCCGCCCGCCCTATTGTGGATTTTATATTTTGTTTGCTAGTTAACTCTAGTAGATGAGATACCACTCTGTCACTGAGAGCAAATTGGAGTGCTCAAAGCAGGCTTGATAGCTTTGAACATTTTAGCTTGGAATGACAAGATATGACTTTTGTTTTATTTTGTTGGTTATGAAATAAAAGTAATGATTAACAGGAACAGCGCGGAGGTATCCGTATTGAAAGGTCAGAGGTGAAATTCTTGGATTCCTTCAAGACGAACAACTGCGAAAGCATTTACCAAGGATGTTT	Eukaryota;Stramenopiles;Sagenista;Labyrinthulomycetes;Thraustochytriales;Thraustochytriaceae;Thraustochytriaceae_X;Thraustochytriaceae_X_sp.;	0.997503	0	0	0	0	0	0	0	0	0	0	98	0	0	0	0	0	0	0	0	0	0	0	0	0	0	0	0	0	0	0	0	0	0	0	0	0	0	0	0	0	0	0	0	0	0	0
3ef5692f9edd45cab1d65c3c877b285f	AGCTCCATCAGTGTATATTAACGTTGTTGCGGTTAAAAAGCTCGTAGTTGGATTTCGGAGCATGGAACTCAAGGCCAGTCAAATTGGCTGTGCCCGAGGAACATCTCCTAGCTTAGGGTAACAGCCTCGCTTCCTTTGCGGGTTGCGATGTGCAGTTCCCTATCATTTACTTTGATAAAATCAGAGTGTTCAAAGCAGGCGTCTTGCCTTGAATGTTGCCGCAAGGGATAATAGAATATGACTTCGGTCCTATTTTGTTGGTTTCTAGGGCTGAAGTAATGACTAATAGGGACAGTTGGGGGCGCTCGTATTGAGTTGTCAGAGGTGAAATTCTAGGATTTACTCAAGACGAACTACTGCGAAAGCATTCGCCAAGGATGTTT	Eukaryota;Amoebozoa;Lobosa;Tubulinea;Nolandida;Nolandellidae;Nolandella	0.999999	0	0	0	0	0	0	0	0	0	0	0	0	0	0	0	0	0	0	0	0	0	0	0	0	0	0	142	0	0	0	0	0	67	0	0	0	0	0	0	0	0	0	0	0	0	0
3f27fdff9f2d5cd553cccd97dc97416d	AGCTCCAATAGCGTATATTAAAGTTGTTGCAGTTAAAAAGCTCGTAGTTGAATGTCTGGTCGACGCGATGACTCCGCTAAGCGGTTGTTTGTCGCGTTTGCCATCTACTCAGGGATCCGCTTTGGCATTAACTTGTTAGAGCGAGGAATTGGGTCGTTTACTGTGAACAAATTAGGGTGTTTAAAGCAGGCAAGTGCTTGCATACATTAGCATGGAATAATAAGATAAGGCCGCCGCGAGTTGTTGGTTTCTCTGCGGCGGTAATGATTAACAGGAACAGTTGTGGATATTCGTATGAGCATGTCAGAGGTGAAATTCTTGGATTTTGATCAGACGAACTACTGCGAAAGCATTTATCAAGGATGTTT	Eukaryota;Stramenopiles;Sagenista;Labyrinthulomycetes;Labyrinthulales;Labyrinthulaceae;Labyrinthula;Labyrinthula_terrestris;	0.94035	0	0	0	0	0	0	0	0	0	0	0	0	0	0	0	0	0	0	0	0	0	0	0	0	0	0	0	0	0	0	0	0	3	0	0	0	0	0	0	0	0	0	0	0	0	0
3f3efa46081c95b86c921d3afd65e2ad	AGCTCCAATAGCGTATATTAAAGTTGTTGCAGTTAAAAAGCTCGTAGTTGGATTTCTGGAAGAATGCTAATGTCCGTAGTTTACGTGTGCAGCAGCGTTCTTTCATCCTTCTGTTAACATTTCTTAGCATTCATTTGCTGGTAATGGGCTCAGATATTTTACCTTGAGAAAATTAGAGTGTTTCAGGCAGGCTAGGCCGGAATACATTAGCATGGAATAATAGAATAGGACTACGGTCTCTTTGTTGGTTTGAGGGACTGCAGTAATGATTAATAGGGATAGTTGGGGGCATTAGTACTTAACTGTCAGAGGTGGAATTCTCAGATTTGTTAAAGACTGACTTATGCGAAAGCATTTGCCAAGGATGTTT	Eukaryota;Alveolata;Ciliophora;Spirotrichea;Strombidiida;Strombidiidae_R	0.747455	0	0	0	0	0	0	0	0	0	0	0	0	0	0	0	0	0	0	0	0	0	0	0	0	0	0	0	0	0	0	0	0	0	0	0	0	0	0	0	0	0	0	0	0	0	0
3f431fb8af24ce757ba646cb3561d3bd	AGCTCCAATAGCGTATATTAAAGTTGTTGCAGTTAAAAAGCTCGTAGTTGGATTTGTGGCGTTCTTGTGGTGTCCGTGCGCAAGTGCGGTATGTTGCGAGTCGCCATCTTTGGGTGGAATCTGTGTGGCATTGAGTTGTCGTGCAGGGGATGCCCATCGTTTACTGTGAAAAAATTAGAGTGTTCAAAGCAGGCTTACGCCGTTGAATATATTAGCATGGAATAATAAGATATGACCTCGGTTCTATTTTGTTGGTTTGCGTCTCGAGGTAATGATTAATAGGGACAGTTGGGGGTATTCGTATTCCATTGTCAGAGGTGAAATTCTTGGATTTCTGGAAGACGAACTACTGCGAAAGCATTTACCAAGGATGTTT	Eukaryota;Stramenopiles;Ochrophyta;Bacillariophyta;Bacillariophyta_X;Raphid-pennate	0.761827	0	0	0	0	0	0	0	0	0	0	0	0	0	0	0	0	0	0	0	0	0	0	0	0	0	0	0	0	0	0	0	0	0	0	0	0	0	0	0	0	0	0	0	0	0	0
3f4d9d4686a4a9b424ecc7e72812cd55	AGCTCCAATAGCGTATATTAAAGTTGTTGCAGTTAAAAAGCTCGTAGTTGGATTTCAAGGAACGTCCTTGGGCAACCATTGACTTCCTATCAGTCTTTGACTGTTACTGTGAGAAAATTAGAGTGTTTCAAGCAGGCTCACGCCAGAATACATTAGCATGGAATAACGAATGTGTCTAGAATCTTGGTTAATTCTAGAATACGATTAATAGGGACAGTTGGGGGCATTAGTATTTAATTGTCAGAGGTGAAATTCTTGGATTTGTTAAAGACTAACGTATGCGAAAGCATTTGCCAAGGATGTTT	Eukaryota;Alveolata;Ciliophora;Litostomatea;Litostomatea_X;Litostomatea_XX	0.826769	0	0	0	0	0	0	0	0	0	0	0	0	0	0	0	0	0	0	0	0	0	0	0	0	0	0	0	0	0	3	0	0	0	0	0	0	0	0	0	0	0	0	0	0	0	0
3f66095d10b8d80bcbc34ea079bc8245	AGCTCCAGTAGCGTATATTAAAGTTGTTGCAGTTAAAAAGCTCGTAGTCGAACTTCGGGCCTGGCAGGATGGTCCGCCTTACGGTGTGTACTGTCCGGCCGGGCCTTACCTCTTGGTGAGGCCGCATGCCCTTCGCTGGGTGTGTGGTGGAACCAGGAACTTTACCTTGAGAAAATTAGAGTGTTCAAAGCAGGCATATGCCCGAATACATTAGCATGGAATAATAGAATAGGACGTGCGGTTCTATTTTGTTGGTTTCTAGGATCGCCGTAATGATTAATAGGGACGGTCGGGGGCATTAGTATTCCGTTGCTAGAGGTGAAATTCTTAGATTTACGGAAGACTAACTTCTGCGAAAGCATTTGCCAAGGACGTTT	Eukaryota;Opisthokonta;Fungi;Basidiomycota;Agaricomycotina;Tremellomycetes	0.999947	0	0	0	0	0	0	0	0	0	0	0	0	0	0	0	0	0	0	0	0	0	0	0	0	0	0	0	0	0	15	0	0	0	0	0	0	0	0	0	0	0	0	0	0	0	0
3f7695bf7f64ac8d22491344f2ec3816	AGCTCCAATAGCGTATATTAATATTGTTGCAGTTAAAAAGCTCGTAGTTGAATGAGTCAAGGCGAATGCCTTGTAATACATGGAAAGTTTCATTCTATTAATTTGGGATGTTAACAATCCATGTCTTTTACCGTGAAAAAAGTAGGGTGTTCAAAACAGGCGATTGCTCGGATATACTAGCATGGAATGATAAGATACGACTCTGGTCGAATTTTGTTGGTGTTGATTGGTGTAATGAATAATAGGAACAGTCGTGGGTATCCGTATGAGCATGTCAGAGGTGAAATTCTTGGATTTTGCTCAGACGAACCACTGCGAAAGCATTTACCAAGAATGTTTTCATCGATCAAGAACGAAA	Eukaryota;Stramenopiles;Sagenista;Labyrinthulomycetes;Labyrinthulales;Labyrinthulaceae;Labyrinthula;Labyrinthula_sp.;	0.999399	0	0	0	0	0	0	0	0	0	0	0	0	0	0	0	0	0	0	0	0	0	0	0	0	0	0	0	0	0	0	19	0	0	0	0	0	0	0	0	0	0	0	0	0	0	0
3f9fa3f33441c47cf297ec35fecd22e0	AGCTCCAATAGCGTATATTAATGTTGTTGCAGTTAAAAAGCTCGTAGTTGAATTTAGGAGGGTTAACCTTCCTGTCTGCACTCCTCATGGCAACTGATATTGCTATGTGGAACAGACTTTTACTGTGAGAAAACTAAAGTGCTCAAAGCAGGCTAACGCTTGAATATTAAAGCATGGAATAATAAAATAGGACTTAATTCTATTATTGGTCATTGGATTAAGTAATGATTAACAGAAACAGTTGGGGGCATTCGTATTTAATTGTCAGAGGTGGAATTCTTGGATTAATTAAAGACGAACTAGTGCGAAAGCATTTGCCAAGGATGTTTTCATCGATCAGAACGAAAGT	Eukaryota;Alveolata;Ciliophora;Phyllopharyngea;Suctoria;Ephelotidae;Ephelota;Ephelota_gigantea;	0.977662	0	0	0	0	0	0	0	0	0	0	0	0	0	0	0	0	0	0	0	0	0	6	0	0	0	0	0	0	0	0	0	0	0	0	0	0	0	0	0	0	0	0	0	0	0	0
3fb41bc80067441860806a56a38bd695	AGCTCTAATAGCGTATATTAAAGTTGTTGCGGTTAAAAAGCTCGTAGTTGAATCTTGGCGCGGCAGGGGTCGGTCCGCCCACTGGGCGTGCGCCGGCTCGGCCGTGCTCTGCTGCCAGATACGCGCCGGTGCACTTAACTGTGTGCCGGTCAGGCTTCGGCCGGCGTTCTGGCTCTTTTACTTTGAGTAAATTAGAGTGTTCAAAGCAGGCAAACTTTTCAGCCACTGAATACATTAGCATGGGATAATGGAATAGGACTTTGGTTCTATTTTGTTGGTTTCTAGGACCGAAGTAATGATTAATAGGGACAGTTGGGGGCATTAGTATTTAATTGTCAGAGGTGAAATTCTTGGATTTATTAAAGACTAACTACTGCGAAAGCATTTGCCAAGGATGTTT	Eukaryota;Amoebozoa;Lobosa;Discosea-Longamoebia;Dermamoebida;Dermamoebidae;Dermamoebidae_X;Dermamoebidae_X_sp.;	0.999997	0	0	0	0	0	0	0	0	0	0	0	0	0	0	0	0	0	0	0	0	0	0	0	0	0	0	0	0	0	0	0	0	13	0	0	0	0	0	0	0	0	0	0	34	0	0
3fbe30a7af48a36ec226fdd2291746f6	AGCTCCAATAGCGTATATTAAAGTTGTTGCAGTTAAAAAGCTCGTAGTTGGATTTCTGATTGGGACTACCGGTCCACGGCCTCTGGTCGTGTGTACTAGTGGGTTCTAGTCTTCCTTATGGGGAACTTGTCTGGCATTGGTTTGTCGGGCTTGGGAGCCATATCATTTACTGTGAAAAAATTAGAGTGTTTAAAGCAGGCACATGCCTTGAATACCTCAGCATGGAATAATAAGATAGGACTTTGGCCTATTTTGTTGGTTTGCAAGCCAGGGTAATGATTAAGAGGGATAGTTGGGGGTATTCGTATTTAATTGTCAGAGGTGAAATTCTTGGATTTATGAAAGACGAACAACTGCGAAAGCATTTACCAAGGATGTTT	Eukaryota;Stramenopiles;Opalozoa;Bicoecea;Borokales;Borokaceae;Borokaceae_X;Borokaceae_X_sp.;	0.764783	0	0	0	0	0	0	0	0	0	0	13	33	0	0	0	0	0	0	5	0	120	0	0	0	0	0	9	0	0	0	0	0	31	0	0	0	0	0	0	3	0	0	0	69	0	12
3fe76f9fd0778e0f1b92426b0a38ee0c	AGCTCCAGAAGCGTATGCTAACGTTGTTGCAGTTAAAAAGCTCGTAGTTGAAGGTTTTTCGGTTGGGTCTGTGGGGCGAATGCTCCGCAGATCGGCCTTTTTCTTTTCCTGGCTCTCTCTTTGGGGGGGCCTCGTTCACTGTAAACAAATTGGAGTGCTCCACGCAGGTCGTTGGGACCTGGACAATTGTTATGGGATGATGAGATAGGGCTCGGGCACTATTTTGTCGGTTTGCATGCCTGGGTAATGGTGAATAGGAACAGTTGGGGATATTCGTATTTAGCGGTCAGAGGTGAAATTCTTGGATTCGGGAAAGACGAACAACTGCGAAGGCATTTATCAAAGATGTTT	Eukaryota;Stramenopiles;Sagenista;Labyrinthulomycetes;Thraustochytriales;Thraustochytriaceae;Thraustochytriaceae_X;Thraustochytriaceae_X_sp.;	0.946521	0	0	0	0	0	0	0	0	0	0	0	0	0	0	0	0	0	60	0	0	0	0	0	0	0	0	0	0	0	0	0	66	0	0	0	0	0	0	0	0	0	0	0	0	0	0
3fea63225ba7b7b125e78a8940a917e7	AGCTCCAATAGCGTATACTAAAGTTGTTGCAGTTAAAAAGCTCGTAGTTGAACCTCTGGTAGGGCCGACCTTGGCGCGCGGTGAATGCCGCGTCGTTTAGAAGCGTCGTTGCCCGGCCATCCTCCCCCGGTCTTTTGGGCTGGGGGTCGTTTACTGTAAAAAAAATAGAGTGTTCCAAGCAGGGGGTAATATCCCGGTATATAGTAGTATGGAATAATGAGATAGGACTTTGGTACTATTTTGTTGGTTTGCATGCCAAGGTAATGATTAAGAGGGACAGTTGGGGGTATTCGTATTTAGATGTCAGAGGTGAAATTCTTGGATTTTCGAAAGACGAACTACTGCGAAAGCATTTACCAAGGATGTTT	Eukaryota;Stramenopiles;Sagenista;Labyrinthulomycetes;Thraustochytriales;Thraustochytriaceae;Thraustochytrium;Thraustochytrium_aureum;	1	0	0	0	0	0	0	0	0	0	0	0	0	0	0	0	0	0	0	0	0	0	0	19	37	0	0	33	33	0	0	12	20	0	0	0	0	71	0	1816	324	0	505	28	0	26	0
3ff7d88dfb14371ef17f54eb931f9698	AGCTCCAATAGCGTATACTAAAGTTGTTGCAGTTAAAAAGCTCGTAGTTGAACCTCTGGTAGGGCCGACCTTGGCGCGCGGTGAATGCCGCGCTGCTTGAAAGCGTCGTTGCCCGGCCATCCTCCCCCAGTCTTTTGGGCTGGGGGTCGTTTACTGTAAAAAAAATAGAGTGTTCCAAGCAGGGGGTAATATCCCGGTATATAGTAGTATGGAATAATGAGATAGGACTTTGGTACTATTTTGTTGGTTTGCATGCCAAGGTAATGATTAAGAGGGACAGTTGGGGGTATTCGTATTTAGATGTCAGAGGTGAAATTCTTGGATTTTCGAAAGACGAACTACTGCGAAAGCATTTACCAAGGATGTTT	Eukaryota;Stramenopiles;Sagenista;Labyrinthulomycetes;Thraustochytriales;Thraustochytriaceae;Thraustochytrium;Thraustochytrium_aureum;	1	0	0	0	0	0	0	0	0	0	0	0	0	0	0	0	0	0	0	0	0	0	0	0	0	0	0	0	0	0	0	0	0	0	0	0	0	0	0	233	0	0	0	0	0	0	0
408b40b4beb3b29e66ef07b5296eb2e4	AGCTCCAATAGCGTATATTAAAGTTGTTGCAGTTAAAAAGCTCGTAGTTGGATTTGTGGCGTACGGTGGGTTCCGGGCACTTGTTGTCTGAGTAACTTGCTGTTGCCATCCTTGGGTGGAACCTGTGTGGCATTAGGTTGTCGTGCAGGGGATGCCCATCATTTACTGTGAAAAAATTAGAGTGTTCAAAGCAGGCTTATGCCGTTGAATATATTAGCATGGAATAATGAGATAGGACTTTTTTGCTATTTTGTTGGTTTGCGCAAAGAGGTAATGATTAATAGGGACAGTTGGGGGTATTCGTATTCCATTGTCAGAGGTGAAATTCTTGGATTTTTGGAAGACGAACTACTGCGAAAGCATTTACCAAGGATGTTT	Eukaryota;Stramenopiles;Ochrophyta;Bacillariophyta;Bacillariophyta_X;Raphid-pennate;Navicula;Navicula_sp.;	0.798877	111	657	889	300	288	170	739	171	68	116	41	20	49	29	0	37	45	60	139	101	17	0	0	0	0	0	0	137	38	0	42	0	0	0	0	0	0	0	0	19	0	0	0	0	0	0
40a10ee72e85aaa2bbe9ea12faba255b	AGCTCCAATAGCGTATATTAAAGTTGTTGCAGTTAAAAAGCTCGTAGTTGGATTTGTGGCTTGTGCCGAGGCGTCCATTCGTTTGGTTCTGCCTTGGCCGTGCCATCCTTGGGTGGAATCTGTGTGGCATTAGGTTGTCGTGCAGGGGATGCCCATCGTTTACTGTGAAAAAATTAGAGTGTTCAAAGCAGGCTTATGCCGTTGAATATATTAGCATGGAATAATAAGATAGGTCTAGGGTCCTATTTTGTTGGTTTGCGGTCCTTAGAAATGATTAACAGGGACAGTTGGGGGTATTCGTATTCCATTGTCAGAGGTGAAATTCTTGGATTTCTGGAAGACGAACTACTGCGAAAGCATTTACCAAGGATGTTT	Eukaryota;Stramenopiles;Ochrophyta;Bacillariophyta;Bacillariophyta_X;Raphid-pennate;Fistulifera;Fistulifera_saprophila;	0.975146	0	0	0	763	0	547	0	64	14	186	0	0	0	26	0	23	0	0	0	0	0	0	0	0	0	0	0	118	0	0	0	0	0	0	0	0	0	0	0	0	0	0	0	0	0	0
40a940413942555158c613841d3d1586	AGCTCCAGTAGCGTATATTAAAGTTGTTGCAGTTAAAAAGCTCGTAGTTGGATTTCTGGCGTGGTGCGCCCGGCCCGACACCGCTAAGGTGTCGAGTGCCGGCGCGCGCCTGCCATCCTTCCGGAGAGCGTGCCTACCCTTCACTGGGCCGGGTACGCGATCTGGATCGTTTACTTTGAAAAAATTAGAGTGTTTAAAGCAGGCTTACGCTTCTGAATACATTAGCATGGAATAATAAGATAGGACTTTGGTTCTATTTTGTTGGTTTCTAGAACTAAAGTAATGATTGATAGGGACAGTTGGGGGTGCTAGTATTTAACGGCCAGAGGTGAAATTCTTGGATTCGTTAAAGACTAACTAATGCGAAAGCATTCACCAAGGATGTCT	Eukaryota;Rhizaria;Cercozoa;Filosa-Granofilosea;Filosa-Granofilosea_X;Massiteriidae;Massisteria;Massisteria_marina;	1	0	0	0	6	9	4	0	0	0	0	30	978	10	0	0	8	0	7	17	9	0	0	0	0	0	0	0	15	0	0	0	0	0	0	0	17	0	0	0	0	0	9	11	0	7	3449
40c0bb25bbe84b205b6ac1fa6ca5fa87	AGCTCCAGAAGCGTATGCTAATGTTGTTGCAGTTAAAAAGCTCGTAGTTGAATTTCTGGTGTGTCTGACCGAGCCTTTGGGCGTATGCTCACTGTTTTGCTTGTTGTTCGGACTGGCCATCTTAGATGTCTGAAAACGACATCTTCATTCACTGTAAAGAAAGCAGAGTGTTCAAAGCAGGTTGTAAAATCTGAATGTTTATTATGGGATGATGAGATAGGGCTCGCGCGCTATTTTGTTGGTTTGCACGCGCAAGTAATGGTGGATGGGAACAGTTGGGGCTATTCGTATTTGGCAGCTAGAGGTGAAATTCTTGGATCTGCAAAAGACGAACCAAGGCGAAGGCATTTAGCAAAGATGTTT	Eukaryota;Stramenopiles;Sagenista;Labyrinthulomycetes;Thraustochytriales;Thraustochytriaceae	0.999653	0	0	0	31	0	51	0	25	0	76	0	0	0	282	0	562	0	162	0	735	0	0	0	63	526	0	0	44	0	73	9	162	0	0	0	48	0	0	0	0	0	0	0	240	0	0
40c14f9f678f52c367a150e6f33aca47	AGCTCCAATAGCGTATATTAAAGTTGTTGCAGTTAAAAAGCTCGTAGTTGAAGTTCTGATTGCTCAGCTCTTCAGCCTTTAGGCGGAGAGTCTGACAGTCATCCGCTTGCAAGCATATGTTCGACCTTTACCGGCCGGCTATGTGAGTAAGCATTTTACCTTGAGAAAAACAGAGTGTTCCAGGCAGGTTTGTCCGGGATGCATTAGCATGGAATAATAGAACATGACTGAAGTCTATTTATTGGTTTAAGGCTTTAGTAATGATTAATAGGAACAGTCGGGGGCATTCGTACTCAGCAGTCAGAGGTGAAATTCTAAGATTTGCTGAAGACGAACTAATGCGAAAGCATTTGCCAAGGATGTTT	Eukaryota;Alveolata;Ciliophora;Oligohymenophorea;Peritrichia_2;Sessilida;Sessilida_X;Sessilida_X_sp.;	0.834513	0	0	0	0	0	0	0	0	0	0	0	0	0	0	0	0	0	0	0	0	0	0	0	0	0	0	0	81	0	0	0	0	0	0	0	0	0	0	0	0	0	0	0	0	0	0
40d1e1c9778c51fffe8ea6a0f8e54da2	AGCTCCAATAGCGTATATTAACGTTGTTGCAGTTAAAAGGCTCGTAGTCAAACATATGGCGTTCGAGAGACTCGTTCACTTCTTATGTTGTGTAACTGAGACTTTCACGTCATCCTTGTGGAGAAGCTTCTCTGTCCTTGATTGGATGGAGTTGCAATCTGCATCACTTACTGTGAAAAAAACAGAGTGTTCAAAGCAGGCTTTTGCTTGTATGATTCAGCATGGAATAATAATATAGAACTTGTTCTATTTTATTGGTTTCTAGAATCAAGTAATGATTAATAGGGATAATTGGGGGTGCTAATATTTAGCGGTCAGCGGTGAAATGCGGAGACCCGTTAAAGATTAACTTATGCGAAAGCATTCACCAAAACTATCT	Eukaryota;Rhizaria;Cercozoa;Endomyxa;Vampyrellida	0.82253	0	0	0	0	0	0	0	0	0	0	0	0	0	0	0	0	0	0	0	0	0	0	0	0	0	0	0	0	0	0	0	12	0	0	0	0	0	0	0	0	0	0	0	0	0	0
40d304bba56669dca136a02886e23ff3	AGCTCCAATAGCGTATATTAAAGTTGTTGCAGTTAAAAAGCTCGTAGTTGGATTTCTGGTTACTTTAGCCTGGTCCGCCCGGTTAACGGTGTGAGTACTGGCGCTAATGGGCCATCCTTCTGGGGAGTGTATCTACCCTTGATTGGGCCGGATGCTCGACCTGGATCGTTTACTTTGAAGAAATTAGAGTGTTTAAAGCAGGCTTATCGCTTTGAATATATTAGCATGGAATAATATGATAGGGCTTTGATCCTATTTTGTTGGTTTCTGGGATTAAAGTAATGATTAATAGGGACAGTTGGGGGTGCTGGTATTTAACGGCCAGAGGTGAAATTCTTGGATTCGTTAAAGACCAACTTATGCGAAAGCATTCACCAAGGATGTCT	Eukaryota;Rhizaria;Cercozoa;Filosa-Granofilosea;Cryptofilida;Nanofilidae;Nanofila;Nanofila_sp.;	0.999996	0	0	0	0	0	0	0	0	0	0	0	0	0	0	0	0	0	0	0	0	0	0	0	0	0	0	0	0	0	0	0	0	0	0	0	0	0	0	0	0	0	0	11	0	0	0
40fb5d810fc445b482c60317d7e581bf	AGCTCCAATAGCGAATACTAATTCTGCTGCAGTTAAAAAGCTCGTAGTTGAACTTCTGGTAGGGCGGATCCGGTCGTTGGACGAATGTCCTCTGTTACTGTGTGTCTCGTCTGGCCATCCTCGGCAACTTTTTTGGTTGTCGTCTTTCACTGTAAAAAAATTAGGGTGTTTCAAGCAAAAGTTATTTGGAATATATTAGTATGGGATGATAAGATAGGCTCTGGATGCTATTTTGTTGGTTTGCACATTTAGAGAATGATTAACAGGGACAGTTGGGGGTATTCATATTTACATGTCAGAGGTGAAATTCTTGGATTTTGGAAAGATGAACTACTGCGAAGGCATTTACCAAGGATGTTT	Eukaryota;Stramenopiles;Sagenista;Labyrinthulomycetes;Thraustochytriales;Thraustochytriaceae;Thraustochytriaceae_X;Thraustochytriaceae_X_sp.;	0.997676	0	0	0	0	0	0	0	0	0	0	0	0	0	0	0	0	0	0	0	0	480	0	0	0	0	0	12	0	0	0	0	0	0	0	0	0	0	0	0	0	0	0	0	0	0	0
410d97a3d19f2079617333de416ecc73	AGCTCCAATAGCGTATATTAAAGTTGTTGCAGTTAAAAAGCTCGTAGTTGAACTTCAGGCCTTGACTGGCGGTCCGCCTCACGGTGTGTACTGTCGGTCGGGGCCTTCCCTCTTGGTGAACCTGCATGCCCTTTACTGGGTGTGTAGGGGAACCAGGACTTTTACTTTGAAAAAATTAGAGTGTTCAAAGCAGGCCTATGCCCGAATACATTAGCATGGAATAATAAAATAGGACGTGCGGTTCTATTTTGTTGGTTTCTAGGATCGCCGTAATGATTAATAGGGATAGTCGGGGGCATTAGTATTCAGTTGCTAGAGGTGAAATTCTTGGATTTACTGAAGACTAACTACTGCGAAAGCATTTGCCAAGGATGTTT	Eukaryota;Opisthokonta;Fungi;Basidiomycota;Agaricomycotina;Agaricomycetes;Basidioascus;Basidioascus_sp.;	0.934541	0	0	0	0	0	0	0	0	0	0	0	0	0	0	0	0	0	0	0	0	0	0	0	0	0	0	0	0	0	0	0	11	0	0	0	0	0	0	0	0	0	0	0	0	0	0
412a1b4a057992b9c22ebad19e0ac8da	AGCTCCAATAGCGTATATTAAAGTTGTTGCAGTTAAAAAGCTCGTAGTTGGATTTCAAGGTGTACTTCCTTAACAAGGTTAGTCATCTACGGTCTTCGGACTGTTACTGTGAGAAAATTAGAGTGTTTAAAGCAGGCTATTGCAGGAATATATTAGCATGGAATAACGAATGTGCTTACAATTTGGTTAATTGTAGGTTACGATTAATAGGGACAGTTGGGGGCATTAGTATTTAATTGTCAGAGGTGAAATTCTTGGATTTGTTAAAGACTAACGTATGCGAAAGCATTTGCCAAAGATGTTTTCATCAATCAGAACGAAAGT	Eukaryota;Alveolata;Ciliophora;Litostomatea;Haptoria_5;Pleurostomatida	0.733526	0	0	0	0	0	0	0	0	0	0	0	0	0	0	0	0	0	0	0	0	0	0	0	0	0	0	0	0	0	0	0	0	0	0	0	0	0	0	0	0	0	0	21	0	0	0
412cc36d7d91fec0e93172f4e247e4f8	AGCTCCAATAGCGTATATTAAAGTTGTTGCAGTTAAAAAGCTCGTAGTTGAACTTCTACGTATACCCAGTTCTGGCTTCGGTCAAGCTGTGGTGTCCGTATCCGCTAGCAAACTTAGACCGGCCTTCATTGGTCGACTAAGGGAGTTGGCATTTTACTTTGAAAAAATTAGAGTGTTTCAAGCAAGCAATGGCCTGAATATACTAGCATGGAATAATGGAATAGGACTTTTGTCTATTTGGTTGGTTATTAGATAAGAGTAATGATTAACAGGGACAGTTGGGAGCATTAGTACTTAATTGTCAGAGGTGAAATTCTTGGATTTATTAAAGACTAACTTATGCGAAAGCATTTGCTAAGGATGTTT	Eukaryota;Alveolata;Ciliophora;Oligohymenophorea;Scuticociliatia_1;Philasterida	0.998497	0	0	0	0	0	0	0	0	0	0	0	0	0	0	0	0	0	0	0	0	172	0	0	0	0	0	0	0	0	0	0	0	78	0	0	0	0	0	0	0	0	0	0	7	0	51
413dc1002fddf2d1b52ae9e284350510	AGCTCCAATAGCGTATATTAAAGTTGTTGCAGTTAAAAAGCTCGTAGTTGAACTTCTGTGTATGCACGGTTCTGGCTTTGGTCAAGCTGTTGTGTGCACATCCGCTTGCAAACTTAGACTGGCCTTCACTGGTCAACTAAGGGAGTAGGCCCTTTACCTTGAAAAAATTAGAGTGTTTCAGGCAGGCAATGGCTCGAATACATTAGCATGGAATAATGGAATAGGACTTTTGTCCATTTGGTTGGTTATTGGACATAAGTAATGATTAAAAGGGACAGTTGGGGGCATTAGTATTTAATTGTCAGAGGTGAAATTCTTGGATTTATTAAAGACTAACTTATGCGAAAGCATTTGCCAAGGATGTTT	Eukaryota;Alveolata;Ciliophora;Oligohymenophorea;Scuticociliatia_1;Philasterida;Glauconema;Glauconema_sp.;	0.829727	0	0	0	0	0	0	0	0	0	0	0	0	0	0	0	0	0	0	0	0	0	0	0	0	0	0	0	0	0	0	0	0	0	0	0	0	0	0	0	0	0	0	0	0	0	50
416e945398fac58a9530959f718754f9	AGCTCCAATAGCGTATATTAAAGTTGTTGCAGTTAAAAAGCTCGTAGTTGGATTTCGGGATGAGAAGCATGGTCTACCGAAAGGTGTGTACTAGGCGGCTCATTCTTCCTTCTGTAGACCTTTGTGGTTCTTGATTGGATTGCAGAGTGGATGCAGAACGTTTACTTTGAATAAATTAGAGTGTTCAAAGCAGGCATTTGCTTGAATACATTAGCATGGAATAATGGAATAGGACTTTGGTTCTATTTTGTTGGTTTCTAGGACCGAAGTAATGATTAATAGGGATAGTTGGGGGCATTAATATTTAATTGTCAGAGGTGAAATTCTTGGATTTATGAAAGATTAACTTCTGCGAAAGCATTTGCCAAGGATGTTT	Eukaryota;Apusozoa;Hilomonadea;Planomonadida;Planomonadidae;Planomonadidae_Group-1;Ancyromonas;Ancyromonas_micra;	0.945221	0	0	0	0	0	0	0	0	0	0	0	0	0	0	0	0	0	0	0	0	0	0	0	0	0	0	0	0	0	0	0	0	0	0	0	7	0	0	0	0	0	0	0	0	0	7
418abcd4279834855783f08c5d5f6d3c	AGCTCCAATAGCGTATATTAAAGTTGTTGCAGTTAAAAAGCTCGTAGTTGGATTTCTGGTTTGGGTGTCCGGTCCGCTCGTAACTTGTTTGCGAGTGCGTACTATGGATGTTCGGACCATTTTTTGTGAGGAACTTTACCTGTCATTAAGTTGATGGGTTTAGGGACTTGCATCGTTTACTGTGAAAAAATTAGAGTGTTTAAAGCAGGCGTTCGCTTCTTGAATACATTAGCATGGAATAATAAGATACGACTTTGGTGGTCTATTTTGTTGGTTTGCACACCAGAGTAATGATTAATAGGGACAGTTGGGGGTATTCATATTTCAGCGTCAGAGGTGAAATTCTTGGATCGCTGAAAGATGAGCTTAGGCGAAAGCATTTACCAAGGATGTTT	Eukaryota;Stramenopiles;Pseudofungi;Oomycota;Oomycota_X;Haliphthorales;Haliphthorales_X;Haliphthorales_X_sp.;	0.999997	0	0	0	0	0	0	0	55	0	0	0	0	0	0	0	0	0	0	0	0	0	0	0	0	0	0	0	0	0	0	0	0	0	0	0	0	0	0	0	0	0	0	0	0	0	0
41c193760e7732cde680e4cf05a89c8f	AGCTCCAATAGCGTATATTAAATTTGTTGCAGTTAAAAAGCTCCTCGTTGGATTTCTGAAGGCAGCTGTTTGGTTTCCCTGATTGGGTTACCTACTGCTGTTTTCATCCTTCTGTTAACGTTGGTTGGCATTCATTTGTCTCCTTCGAGCTCAGATACTTTACCTTGAGCAAATTAGAGTGTTTCAGGCAGGCTTGCGCCCGAATACATTAGCATGGAATAATAGAATAGGACTGCGTCTCATTTTGTTGGTTTTATGAACGTAGTAATGATTAATAGGGATAGTTGGGGGCATTAGTATTTAACAGTCAGAGGTGAAATTCTTTGATTTGTTAAAGACTAACTTATGCGAAAGCATTTGCCAAGAATGTTT	Eukaryota;Alveolata;Ciliophora;Spirotrichea;Euplotia;Aspidiscidae;Aspidisca	0.846168	0	0	0	0	0	0	0	0	0	0	0	0	0	0	0	0	0	0	0	0	0	0	0	0	0	0	0	0	0	0	0	0	0	0	0	0	0	0	0	0	0	0	0	0	0	0
41d798b6d2d6e40078e462c0b5920027	AGCTCCAGTAGCGTATATTAAAGTTGTTGCAGTTAAAAAGCTCGTAGTTGAACTTCTGCGTAGTGCAACTGACGTCTTCGGACTGATTTGCTCTGCGCATCCATCTGAACAGCATTTCTTGTCATTGATTTGGCGGTTGTGTGATCAGATACTTTACCTTGAGAAAAATAGAGTGTTCCAAGCAGGCGCTCGCCTGAATAATAAAGCATGGAATAATACAATAGGACTGAGTTCTATTGGTGCATAGACCTTAGTAATGATTAATAGGGACAGTTGGGGGCATTCGTATTTCGTAGTCAGAGGTGAAATTCTTTGATTTATAAAAGACGAACCTATGCGAAAGCATTTGCCAAGGATGTTT	Eukaryota;Alveolata;Ciliophora;Heterotrichea;Heterotrichea_X;Peritromidae;Peritromus	0.9968	0	0	0	0	0	0	0	0	0	0	0	0	0	0	0	0	0	0	0	0	0	0	0	0	0	0	0	0	0	0	0	0	30	0	0	0	0	0	0	0	0	0	0	0	0	0
41d938912dfd34c669a712063ef07f7a	AGCTCCACTAGTGTATCTTAACGTTGTTGCAGTTAAAAAGCTCGTAGTTGAATTTCTGTTTAGCCTCCTCGTCTTCGGACAAGGCTGGCTATTCATCCGCGTTCTAAGCTAGCCCGACATTAATTTGTCAGCTAGGGGAAGACGCATTTTACTTTGAAGAAATTAGAGTGTTCCAAGCAAGCATTGCATGAATATTACAGCATGGAATAATGGAATAGGACAGAGTCAATTTTATTGGTTATTCGACTTTGTAATGATTAACAGGGACAGTTGGGGGCATTCGTATTCAGTTGTCAGAGGTGAAATTCAGAGATTAACTGAAGACGAACTAATGCGAAAGCATTTGCCAAGGATGTTT	Eukaryota;Alveolata;Ciliophora;Phyllopharyngea;Chonotrichia;Isochonopsidae;Isochona;Isochona_sp.;	0.999931	0	0	0	0	0	0	0	0	0	0	0	0	0	0	0	0	0	0	0	0	23	0	0	0	0	0	0	0	0	0	0	0	0	0	0	0	0	0	0	0	0	0	0	0	89	0
41d94a083fc8f4742ef3320e6852e079	AGCTCCAATAGCGTATATTAATGTTGTTGCAGTTAAAAAGCTCGTAGTTGAATTTAGAAGGCTAAGGCTTTCTGTCTGCCCTCTGTATGGCAACTGATATTGCTATATAGAACAGACTTTTACTGTGAGAAAACTAAAGTGCTCAAAGCAGGCTAACGCTTGAATATTAAAGCATGGAATAATAAAATAGGACTTTATTCTTTTATTGGTCATTGGATAAAGTAATGATTAACAGAAACAGTTGGGGGCATTCGTATTTAATTGTCAGAGGTGAAATTCTTGGATTAATTAAAGACGAACTAGTGCGAAAGCATTTGCCAAGGATGTTT	Eukaryota;Alveolata;Ciliophora;Phyllopharyngea;Suctoria;Ephelotidae;Ephelota	1	0	0	0	0	0	6	0	0	0	0	0	0	0	0	0	0	0	0	322	32	0	0	0	0	0	0	0	0	0	0	0	0	0	0	0	0	0	0	0	0	0	0	0	0	0	0
427149cfbb6a372c531c26a5baf81b93	AGCTCCAGAAGCGTATGCTAACGTTGTTGCAGTTAAAAAGCTCGTAGTTGAAGGTCTGTCGGTTGGGTCTGTGGGGCGAATGCTCTGTAGATCGGCCTTTTTTCTTCTTGGCTCTCTCTTTGAGGGGGCCTCGTTCACTGTAAACAAATTGGAGTGCTCCACGCAGGTCGTTGGGACCTGGACAATTGTTATGGGATGATGAGATAGGGCTCGGGCACTATTTTGTCGGTTTGCATGCCTGGGTAATGGTGAATAGGAACAGTTGGGGATATTCGTATTTAGCGGTCAGAGGTGAAATTCTTGGATTCGGGAAAGACGAACAACTGCGAAGGCATTTATCAAAGATGTTT	Eukaryota;Stramenopiles;Sagenista;Labyrinthulomycetes;Thraustochytriales;Thraustochytriaceae;Thraustochytriaceae_X;Thraustochytriaceae_X_sp.;	0.917094	0	0	0	0	0	0	0	0	0	0	0	0	0	0	0	0	0	0	0	0	0	0	0	0	0	0	0	0	0	0	0	43	0	0	0	0	0	0	0	0	0	0	0	0	0	0
42dc86a72fff74f6610a033aeee340aa	AGCTCCAATAGCGTATATTAAAGTTGTTGCAGTTAAAAAGCTCGTAGTTGGATTTGTGGACATCGGCGTGGTCCAATTGGTACCGGTGTTGGTGTCTATGTTTGGGTTGAGCCAGTGTGGCATTAAGTTGTCGTGTTGGGGGTGCTCATCGTTTACTGTGAAAAAATTAGAGTGTTCAAAGCAGGCTTAGGCCGTTGAATATATTAGCATGGAATAATGGGATAGGGCCTTGGTGCTATTTTGTTGGTTTGTGTGCCGAGGCAATGGTTAATAGGAACGGTTGGGGGTATTCGTATTCCATTGTCAGAGGTGAAATTCTTGGATTTCTGGAAGACGAACGACTGCGAAAGCATTTACCAAGGATGTTT	Eukaryota;Stramenopiles;Ochrophyta;Bacillariophyta;Bacillariophyta_X	0.993679	0	0	0	0	0	0	0	0	0	0	0	0	0	0	0	0	0	0	0	0	0	0	0	0	0	0	0	0	0	0	0	0	0	0	0	0	0	0	0	0	0	0	0	0	0	0
4315f64aca317424d66e3678141617a5	AGCTCCAATAGCGTATATTAAAGTTGTTGCAGTTAAAAAGCTCGTAGTTGGATTTCTGGTGGGAGTGACCGTTCCAGACTTGATTGTCTGTGTATTGAGTTGTCTCCAGCCATCCTTGTGGAGAACACTCCTTGCATTAATTTGTAGGGATTGGGACCCACATCGTTTACTGTGAAAAAATTAGAGTGTTTAAAGCAGGCAATGGCTTGAATACATTAGCATGGAATAATAAGATAGGACTTTGGTACTATTTTGTTGGTTTGCATACCAAATTAATGATCAACAGGAACAGTTTGAGGATATTCGTATGAACATGTCAGAGGTGAAATTCTTGGATTTTGATCAGACGAACTACTGCGAAAGCATTTATCAAGGATGTTT	Eukaryota;Stramenopiles;Sagenista;Labyrinthulomycetes;Thraustochytriales;Thraustochytriaceae;Labyrinthuloides;Labyrinthuloides_minuta;	0.860469	0	0	0	0	0	0	0	0	0	0	0	0	0	0	0	0	0	0	0	0	0	0	0	0	0	0	0	0	0	0	0	0	0	0	0	0	0	0	111	0	0	0	0	0	0	0
43449877c64469ec9573ffb32af695b7	AGCTCTAATAGCGTATATTAAAGTTGTTGCAGTTAAAAAGCTCGTAGTCGGATGTCGGGCTCGGGCAAGCTGTCGGCCTCTGGTCGGACGGCAGGCTCGGGTCTTTCTGCCTGAGGAACCCGGTTGCTTTCGGGCTGCCGGTGGACGCAGGTCGTTTACTTTGAAAAAATTAGAGTGTTCAAAGCAGGCTAGCGCTTGAATACATTAGCATGGAATAATGGAATAGGACTTTGGTGCTATTTTGTTGGTTTATGGGACCGAAGTAATGATTAACAGGGACAGTTGGGGCCGTTTATATTTCGTTGTCAGAGGTGAAATTCTTGGATTTACGAAAGATAAACTTCTGCGAAAGCATTCGGCAAGGATGTTT	Eukaryota;Hacrobia;Cryptophyta;Cryptophyceae;Cryptomonadales;Cryptomonadales_X	0.998947	0	0	0	0	0	0	0	0	0	0	0	0	0	0	0	0	0	0	0	0	0	0	0	0	0	0	0	0	0	0	0	0	0	0	0	0	0	0	0	0	0	0	0	0	0	0
4346c9388442245b5ecc81f7e13ae6eb	AGCTCCAGAAGCGTATATTTAAATTGTTGCTGTTAAAAAGCTCGTAGTTGGATATCTGGTGTGGTGTGATTGGTCCTTTACCGATAGGTGATTGTGTATTGATTATGCCTGCCATCTTTGTTGTGTTGTGGTTTGTTGAGTTATTGTTTCTATTCATTTAGAAGCTTTAGCTCTCCAACCATTTTAAAAACAATGCAACTCGTTTACTTTGAAAAAATTAGAGTGTTTAAAGCAGACCATTACAGGTCACTGAATACATTAGCATGGAATAATAAGATAGGACTTTGGCCCTATTTTGTTGGTTTCTAGGACTGAAGTAATGATTGATAGGGACAGTTGGGGGTGCTAGTATTTAACGGCCAGAGGTGAAATTCTTGGATTCGTTAAAGACTAACTAAT…	Eukaryota;Rhizaria;Cercozoa;Filosa-Granofilosea;Limnofilida;Limnofilidae;Limnofila	0.82413	0	0	0	0	0	0	0	0	0	0	0	0	0	0	0	0	0	0	0	0	0	0	0	0	0	0	0	0	0	0	0	0	0	0	0	0	0	0	0	0	0	0	0	0	0	0
4370c53e2e5bc69bcf93ac2058959cbb	AGCTCCAATAGCGTATATTAAAGTTGTTGCAGTTAAAAAGCTCGTAGTTGGATTTCTGTGAGAGTGCCGGGGTCGGCTGATGCTTGTACACTGGCGCTCTTACATCCTTCTGTTAACCGTTCTTGGCATTCGTTTGCTGGTACGGGGCTCAGATATTTTACCTTGAGAAAATTAGAGTGTTTCAGGCAGGCTTATGCCGGAATACATTAGCATGGAATAATGGAACAGGACCTGTGCGTCTCTCGGGGCGCCGGTCTCCGTTATTGGTTTCGGGGACTAAAGTAATGATTAATAGGGATAGTTGGGGGCATTAGTATTTAATAGTCAGAGGTGAAATTCTCGGATTTGTTAAAGACTAACTTATGCGAAAGCATTTGCCAAGGATGTTT	Eukaryota;Alveolata;Ciliophora;Spirotrichea;Hypotrichia;Holostichidae;Holosticha	1	0	0	0	0	0	0	0	0	0	0	0	0	0	0	0	0	0	0	0	0	0	9	0	15	0	6457	0	0	0	0	0	0	0	20	16	8	0	8	17	13	15	15	10	0	0	0
43c0a5a30c67e4cb249ddcda06f460c8	AGCTCCAGTAGTGTATATCAAAGTTGTTGCGGTTAAAAAGCTCGTAGTTGGATTTCCCGGCAAAATAAGGTGCGGGATGTGGTCATTTGAACTGCGGCCATGCCTTTTCCGGTGGTTGTGCGACCTTTTTGGGGCGTACGGCATGTACTTTGAACAAATTAGAGTGCTCAAGACAGGCGATTTTTTATTGCTGTGAATAGATTAGCATGGAATACGGGTATAAACTCTCTTCTCGGGATTGTTGTTTTGACGAGGAGGGGGAATGATGGATAGGGACAGGTGTGGGCATTGAGATTGTTACGTCAGAGGTGAAATTCTTAGATCGTAGCAGGATTAGCAGACGCGAAAGCATTTGTCAAGGATGTTT	Eukaryota;Apusozoa;Apusomonadidae;Apusomonadidae_Group-2;Apusomonadidae_Group-2B;Apusomonadidae_Group-2B_X;Apusomonadidae_Group-2B_XX;Apusomonadidae_Group-2B_XX_sp.;	1	0	0	0	0	0	0	0	0	0	0	0	0	0	0	0	0	0	0	0	0	36	0	0	0	0	0	0	0	0	0	0	0	0	0	0	0	0	0	0	0	0	0	0	0	0	0
440ccd8ff28b1f7b754caa0627f12242	AGCTCCAGTAGTGTATATCAAAGTTGTTGCGGTTAAAAAGCTCGTAGTTGGATTTCCCGGATAGTTGGGTGTGGGATGTGGTCATTTGAACTGCGGCCATGCCTTTACCGGTGGTTGTGCGACCTTTTTTTGGGGTTGTACGGCATGTACTTTGAACAAATTAGAGTGCTCAAGACAGGCGATTTTTTATTGCTGTGAATAGATTAGCATGGAATACGGGTATAAACTCTCTTCTCGGGATTGTTGTTTTGACGAGGAGGGGGAATGATGGATAGGGACAGGTGTGGGCATTGAGATTGTTACGTCAGAGGTGAAATTCTTAGATCGTAGCAGGATTAGCAGACGCGAAAGCATTTGTCAAGGATGTTT	Eukaryota;Apusozoa;Apusomonadidae;Apusomonadidae_Group-2;Apusomonadidae_Group-2B;Apusomonadidae_Group-2B_X;Apusomonadidae_Group-2B_XX;Apusomonadidae_Group-2B_XX_sp.;	1	0	0	0	0	0	0	0	0	0	0	82	148	0	0	0	0	0	0	0	0	0	0	0	0	0	0	0	0	0	0	0	0	0	0	0	0	0	0	0	0	0	0	0	0	0	0
4416f48b244eba77a3889e6ab2129661	AGCTCCAATAGCGTATATTAAAGTTGTTGCAGTTAAAAAGCTCGTAGTTGGATTTGTGGCGTTCGCGTGCGACCTGGCATTCGTGCCGGTGTTTGCTAGCGTCGCCATCCTTGGGTGGAACCTGTGTGGCATTAGGTTGTCGTGCAGGGGATGCCCATCGTTTACTGTGAAAAAATTAGAGTGTTCAAAGCAGGCTTATGCCGTTGAATATATTAGCATGGAATAATGAGATAGGACTTTGTTGCTATTTTGTTGGTTTGCGCGAGAAGGTAATGATTAATAGGGACAGTTGGGGGTATTCGTATTCCATTGTCAGAGGTGAAATTCTTGGATTTCTGGAAGACGAACTACTGCGAAAGCATTTACCAAGGATGTTT	Eukaryota;Stramenopiles;Ochrophyta;Bacillariophyta;Bacillariophyta_X;Raphid-pennate;Nitzschia;Nitzschia_draveillensis;	0.7714	0	1	0	0	0	0	0	0	0	0	0	0	0	0	0	0	0	0	0	0	0	0	0	0	0	0	0	0	0	0	0	0	0	0	0	0	0	0	0	0	0	0	0	0	0	0
444f1a82cda3595e70b95f044a06426d	AGCTCCAATAGCGTATATTAAAGTTGTTGCAGTTAAAAAGCTCGTAGTTGGATTTGTGGTATTCGCGCGGGACTTGACATTCGTGTCTTAGTATTCGCGCGTTACCATCCTTGGGTGGAATCTGTGTGGCATTTAGTTGTCGCGCAGGGGATGCCCATCGTTTACTGTGAAAAAATTAGAGTGTTCAAAGCAGGCTTATGCCGTTGAATATATTAGCATGGAATAATGAGATAGGACCTTGGTACTATTTTGTTGGTTTGCGCACCGAGGTAATGATTAATAGGGACAGTTGTGGGTATTCGTATTCCATTGTCAGAGGTGAAATTCTTGGATTTCTGGAAGACGAACTAATGCGAAAGCATTTACCAAGGATGTTTTCATTAATCAAGAACGAAAG	Eukaryota;Stramenopiles;Ochrophyta;Bacillariophyta;Bacillariophyta_X;Raphid-pennate	0.961788	0	0	0	0	1	0	0	0	0	0	0	0	0	0	0	0	0	0	0	0	0	0	0	0	0	0	0	0	0	0	0	0	0	0	0	0	0	0	0	0	0	0	0	0	0	0
44881cf494ca3a25717d7c033a63560a	AGCTCCAATAGCGTATATTAAAGTTGTTGCAGTTAAAAAGCTCGTAGTTGAATTTCTGGGTCGGGCGCCGGTCCACCCTTTGTGGTGCGCACTAGGTTTTTGTCCCGGCCCATATTTGTGGGGTGCTGCCTGGCCTTGATTGGTTCGGGTGGTGTTTAGCCCTGCATCGATTACTGTGAACAAATTAGAGTGTTTAAGGCGGGCGTTGGCTTGAATACATTAGCATGGAATAATGACATAGGACTTTGGTGTCTATGTGTTGGTTGAGGACCAAGGTAATGATTAATAGGGATAGTTGGGGGTATTCATATTTGATTGTCAGAGGTGAAATTCTTGGATTTATTAAAGATGAACAACTGCGAAAGCATTTACCAAGGATGTTT	Eukaryota;Stramenopiles;Opalozoa;Bicoecea;Bicoecales;Bicoecaceae;Bicoecaceae_X;Bicoecaceae_X_sp.;	0.999993	0	0	0	0	0	0	0	0	0	0	0	0	0	0	0	0	0	0	0	0	0	0	0	0	0	0	0	0	0	0	0	0	0	0	0	0	0	0	0	0	0	0	14	0	0	0
44884b0b1ecdb486cdbdcac485da175e	AGCTCCAGTAGCGTATATTAAAGTTGTTGCAGTTAAAACGCTCGTAGTCGAACTTCGGGCCTGGCGGGATGGTCCGCCTTACGGTGTGTACTATCCGGCTGGGCCTTACCTCTTGGTGAGACCTCATGCTCTTTACTGGGTGTGGGGTGGAACCAGGAATTTTACCTTGAGAAAATTAGAGTGTTCAAAGCAGGCAAACGCCCGAATACATTAGCATGGAATAATAGAATAGGACGTGCGGTTCTATTTTGTTGGTTTCTAGGATCGCCGTAATGATTAATAGGGACGGTCGGGGGCATTGGTATTCCGTTGCTAGAGGTGAAATTCTTAGATTTACGGAAGACTAACTACTGCGAAAGCATTTGCCAAGGACGTTT	Eukaryota;Opisthokonta;Fungi;Basidiomycota;Agaricomycotina;Tremellomycetes;Cryptococcus;Cryptococcus_carnescens;	0.985131	0	0	0	0	0	0	0	0	0	0	0	0	0	0	0	0	0	0	0	0	0	0	0	0	0	0	0	0	0	0	0	7	0	0	0	0	0	0	0	0	0	0	0	0	0	0
449a2de61e84d4b3dd1dc4df5818ad4f	AGCTCCAATAGCGTATATTAAAGTTGTTGCAGTTAAAAAGCTCGTAGTTGGACTTGTGGTTCTCCCCGAGGTCCAATTTTGGTACTTTTGGGGAGTCCCATCCTTGGGTGGATCCTGTGTGGCATTAGGTTGTCGTGCAGGGGATGCCCATCGTTTACTGTGAAAAAATTAGAGTGTTCAAAGCAGGCTTACGCCGTTGAATATATTAGCATGGAATAATGAGATAGGACCTTGGTACTATTTTGTTGGTTTGCGCACCAAGGTAATGATTAATAGGGACAGTTGTGGGTATTCGTATTCCATTGTCAGAGGTGAAATTCTTGGATTTCTGGAAGACGAACTAATGCGAAAGCATTTACCAAGGATGTTT	Eukaryota;Stramenopiles;Ochrophyta;Bacillariophyta;Bacillariophyta_X;Raphid-pennate	0.999892	0	0	0	0	0	0	32	0	0	0	0	0	0	0	0	0	0	0	0	0	0	0	0	0	0	0	0	267	22	0	0	0	26	0	0	0	0	0	0	0	0	0	0	0	0	0
44c7874511e83e349db260f6334a73a6	AGCTCCAATAGCGTATATTAAAGCTGTTGCGGTTAAAAAGCTCGTAGTTGGATTTCTGTCAAGGACAACTGGTCCGCCCCTCGGGTGAGCACATAGTTTGGTCTTGGCATCTTGTTGGAAACTGTTGCTGCACTTGGTTGTGTGGCGCAGTGTCCAGCACTTTCACTTTGAGGAAATTGGAGTGTTTCAAGCAGGCACATGCCTTTGGACACAGTAGCATGGAATAATTAGATTGGGCTTTTGCTCCAACTTGTCGGTTTCTGGAGCTGAGGTGAGAATTAATGGGGATTGTTGGGGGCATCCGAATTTAGCCGTCAGAGGTGAAATTCTTGGATCTGCTAAAGACGGACAACTGCGAAAGCGTTTGCCCAGGATGTTT	Eukaryota;Alveolata;Dinoflagellata;Dinophyceae;Gymnodiniales;Gymnodiniaceae;Amphidinium;Amphidinium_sp.;	0.99996	0	0	0	0	0	0	0	0	0	0	0	0	0	0	0	0	0	0	0	0	0	0	0	0	0	0	0	0	0	0	0	30	0	0	0	0	0	0	0	0	0	0	0	0	0	0
44cf909d0f3ed58e557da77f73c1039b	AGCTCCAATAGCGTATATTAAAGTTGTTGTGGTTAAAAAGCTCGTAGTTGAACCTTGGCCTCGGCCGGCCGGTCCGCCTCACCGCGTGCACTGGCTCGGCCGGGGCTTTCCCTCTGTGGAACCCCATGCCCTTCACTGGGCGTGGCGGGGAAACAGGACTTTTACTTTGAAAAAATTAGAGTGCTTCAGGCAGGCCTATGCTCGAATACATTAGCATGGAATAATAAAATAGGACGTGCGGTTCTATTTTGTTGGTTTCTAGGACCGCCGTAATGATTAATAGGGACAGTCGGGGGCATCAGTATTCAATTGTCAGAGGTGAAATTCTTGGATTTATTGAAGACTAACTACTGCGAAAGCATTTGCCAAGGATGTTT	Eukaryota;Opisthokonta;Fungi;Ascomycota;Pezizomycotina;Sordariomycetes;Emericellopsis;Emericellopsis_alkalina;	0.83578	0	0	0	0	0	0	0	0	0	0	0	0	0	0	0	0	0	0	0	0	0	0	0	0	0	0	81	0	0	0	0	0	0	0	0	0	13	0	0	0	0	0	0	0	0	0
44d416c3ff5222fae4378e131d5dcbc5	AGCTCCAATAGCGTATATTAAAGTTGTTGCAGTTAAAAAGCTCGTAGTTGGATTTCTGGTGGGAGTGACCGTTCCGGACTTGATTGTCTGTGTATTGAGTTGTATCCAGCCATCCTTGTGGAGAACTTTTCTTGCATTAATTTGTAGGGATTGGGACCCACATCGTTTACTGTGAAAAAATTAGAGTGTTTAAAGCAGGCAATCGCTTGAATACATTAGCATGGAATAATAAGATAGGACTTTGGTACTATTTTGTTGGTTTGCATACCAAATTAATGATCAACAGGAACAGTTTGAGGATATTCGTATGAACATGTCAGAGGTGAAATTCTTGGATTTTGATCAGACGAACTACTGCGAAAGCATTTATCAAGGATGTTT	Eukaryota;Stramenopiles;Sagenista;Labyrinthulomycetes;Thraustochytriales;Thraustochytriaceae;Labyrinthuloides;Labyrinthuloides_minuta;	0.912285	0	0	0	0	0	0	0	0	0	0	0	0	0	0	0	0	0	0	0	0	0	0	0	0	0	0	0	0	0	0	0	0	0	0	0	0	0	0	90	0	0	0	0	0	0	0
44d9b2ce47c5eeb283163037e12e4ce3	AGCTCCAATAGCGTATATTAAAGTTGTTGCAGTTAAAAAGCTCGTAGTTGGATTTCTGGTAGGGTGCCAATGTCCGCCGCCGTGCGAGCGCAGCGGCGCCCTACCATCCTTCTGTCAACGCCTCTCGACCTTCGCTGGTCGGTGGCGGGCCCAGATATTTTACCTTGAGAAAATTAGAGTGTTTCAGGCAGGCTAGGCCGGAATACATTAGCATGGAATAATGGAATAGGACTTCGGTCTCTTTGTTGGTTTGAGGGACTGCAGTAATGATTAATAGGGATAGTTGGGGGCATTAGTATTTAATAGTCAGAGGTGGAATTCTCGGATTTGTTAAAGACTAACTTATGCGAAAGCATTTGCCAAGGATGTTT	Eukaryota;Alveolata;Ciliophora;Spirotrichea;Strombidiida;Strombidiidae;Strombidium;Strombidium_sp.;	0.999918	0	0	0	0	0	0	0	0	0	0	0	0	0	0	0	0	0	0	0	0	0	0	0	0	0	0	0	0	0	0	0	0	0	0	0	0	0	0	0	0	0	0	0	0	0	0
44e63c207bc03d0944dc530b87a972d0	AGCTCCAATAGCGTATATTAAAGTTGTTGCAGTTAAAAAGCTCGTAGTTGAAATTCTGGTTGCTAGGACGGTGTGCCCTTGGGCGGCCGGGCCTACAGCCATCCGCCTGTAAATATATGTTCATCCTTCACTGGATGGCTATATGAGCAGGCATTTTACCTTGAGAAAAACAGAGTGTTCCAGGCAGGTTTGTCCGGAATGCATTAGCATGGAATAATAGAATATGACTGAAGTCTATTTATTGGTTTAAGGCTACAGTAATGATTAATAGGAACAGTCGGGGGCATTAGTACTTGACAGTCAGAGGTGAAATTCTTGGATTTGTCAAAGACTAACTAATGCGAAAGCATTTGTCAAGGATGTTT	Eukaryota;Alveolata;Ciliophora;Oligohymenophorea;Peritrichia_2;Vaginicolidae;Vaginicolidae_X;Vaginicolidae_X_sp.;	0.99991	24	10	0	0	0	0	0	0	0	0	0	0	0	0	0	0	0	0	8	0	0	0	0	0	0	0	0	0	0	0	0	0	0	0	0	0	0	0	0	0	0	0	0	0	0	0
451b31bee8fcb435eb72f552284e3a33	AGCTCCAATAGCGTATATTAAAGTTGTTGCAGTTAAAAAGCTCGTAGTTGAACTTGTGACAGGAGTGACCTGGCCTTTGGATGAATTTCCATTGTTATGCTGTGTGTTTTTCTCTAGTCATCCTACGTCAATTTTATTTTTAAATTGATGTTCTTTTACTGTTAGCAAAATAGAGTGTTCCAAGCAAAGCGTAGTTTTGAATACATTAGAATGGAATAATAAGATAGGACCTCGGTGCTATTTTGTTGGTTTGCACACCAAGGTAATGATTAACAGGGACAGTTGGGGGTATTCGTATTTAATTGTCAGAGGTGAAATTCTTGGATTTATGAAAGACGAACTACTGCGAAAGCATTTACCAAGGATGTTT	Eukaryota;Stramenopiles;Sagenista;Labyrinthulomycetes;Thraustochytriales;Thraustochytriaceae;Thraustochytriaceae_X;Thraustochytriaceae_X_sp.;	0.99994	0	0	0	0	0	0	0	0	0	0	0	0	0	0	0	0	0	0	0	0	0	0	0	0	0	0	0	0	0	0	0	0	0	0	0	0	0	0	0	0	0	0	0	0	0	0
4576881a991b7c0eebdc32f5d34c6b08	AGCTCCAATAGCGTATATTAAAGTTGTTGCGGTTAAAAAGCTCGTAGTTGGATTTCTGCCGAGGACGACCTGTCCGCCCACTGGGTGTGTATCTTGGCTCGGCCTGGGCATCTTCTTTGGAGAACGTATCTGCACTTGACTGTGTGGTGCGGTATCCAGGACTTTTACTTTGAGGAAATTAGAGTGTTTCAAGCAGGCACACGCCTTGAATACGTTAGCATGGAATAATAGGATAGGACCTTGGTTCTATTTTGTTGGTTTCTAGAACTGAGGTAATGATTAATAGGGATAGTTGGGGGCATTCGTATTTGACTGTCAGAGGTGAAATTCTTGGATTTATTAAAGACGGACTACTGCGAAAGCATTTGCCAAGGATGTTT	Eukaryota;Alveolata;Dinoflagellata;Dinophyceae;Peridiniales;Thoracosphaeraceae	0.965691	0	0	0	0	0	0	0	0	0	0	0	0	0	0	0	0	0	0	0	0	0	0	0	0	0	0	0	0	0	0	0	0	0	0	0	0	0	0	0	0	0	0	0	0	0	15
45768874ca5b325e462724ddde5491ea	AGCTCCAATAGCGTATATTAAAGTTGTTGCAGTTAAAAAGCTCGTAGTTGGATTTCTGGTGGGAGTGACCGTTCCGGACTTGATTGTCTGTGTGTTGAGTTGTCTCCAGCCATCCTTGTGGAGAACTTTTCTTGCATTAATTTGTAGGGATTGGGATCCACATCGTTTACTGTGAAAAAATTAGAGTGTTTAAAGCAGGCAATCGCTTGAATACATTAGCATGGAATAATAAGATAGGACTTTGGTACTATTTTGTTGGTTTGCATACCAAATTAATGATCAACAGGAACAGTTTGAGGATATTCGTATGAACATGTCAGAGGTGAAATTCTTGGATTTTGATCAGACGAACTACTGCGAAAGCATTTATCAAGGATGTTT	Eukaryota;Stramenopiles;Sagenista;Labyrinthulomycetes	1	0	0	0	0	0	0	0	0	0	0	0	0	0	0	0	0	0	0	0	0	0	0	0	0	0	0	0	0	0	0	0	0	0	0	0	0	0	0	83	0	0	0	0	0	0	0
459fcb11314d1d5fb7c14730c68374cd	AGCTCCAATAGCGTATATTAAAGTTGTTGCAGTTAAAAAGCTCGTAGTTGGATTTGTGGTGTGTGGTGGGTTCCGGGCACTTGTTGCCTGAGTAACTTGCCGCTGCCATCCTTGGGTGGAACCTGTGTGGCATTAGGTTGTCGTGCAGGGGATGCCCATCGTTTACTGTGAAAAAATTAGAGTGTTCAAAGCAGGCTTATGCCGTTGAATATATTAGCATGGAATAATGAGATAGGACTTTTTCGCTATTTTGTTGGTTTGCGCGAAGAGGTAATGATTAATAGGGACAGTTGGGGGTATTCGTATTCCATTGTCAGAGGTGAAATTCTTGGATTTTTGGAAGACGAACTACTGCGAAAGCATTTACCAAGGATGTTT	Eukaryota;Stramenopiles;Ochrophyta;Bacillariophyta;Bacillariophyta_X;Raphid-pennate;Navicula;Navicula_sp.;	0.792155	0	28	0	0	19	14	0	0	19	0	0	0	0	0	0	0	0	0	0	0	0	0	0	0	0	0	0	0	0	0	0	0	0	0	0	0	0	0	0	0	0	0	0	0	0	0
45da4837461fc431eec2528a82e092cf	AGCTCCAATAGCGTATATTAAAGTTGTTGCAGTTAAAAAGCTCGTAGTTGGATTTCGGGATGAGAAGCATGGTCTACCGAAAGGTGTGTACTAGGCGGCTCATTCTTCCTTCTGTAAACTTGCGTGGCTCTTCATTGGGTTGCGTACAGGATGCAGAACGTTTACTTTGAATAAATTAGAGTGTTCAAAGCAGGCATTTGCTTGAATACATTAGCATGGAATAATGGAATAGGACTTTGGTTCTATTTTGTTGGTTCTTAGGACCGAAGTAATGATTAATAGGGATAGTTGGGGGCATTAATATTTAATTGTCAGAGGTGAAATTCTTGGATTTATGAAAGATTAACTTCTGCGAAAGCATTTGCCAAGGATGTTT	Eukaryota;Apusozoa;Hilomonadea;Planomonadida;Planomonadidae;Planomonadidae_Group-1	1	0	0	0	0	0	0	0	0	0	0	0	0	0	0	0	0	0	0	0	0	28	0	0	0	0	0	0	0	0	0	0	0	0	0	0	0	0	0	0	0	0	0	0	0	0	0
4621991c00ce20022405226f119065e5	AGCTCCAATAGCGTATATTAAAGTTGTTGCAGTTAAAAAGCTCGTAGTTGAATTTCTGTATAGTCCCGATTCTGGCTTCGGTCAAGTCGTGGATTATGCATCCGCTTGCAAACCTAGACCGGCCTTCACTGGTCGACTAGGGGAGTAAGCCCTTTACTTTGAAAAAATTAGAGTGTTTCAGGCAGGCAATGGCTCGAATACATTAGCATGGAATAATGGAATAGGACTTTTGTCCATTTGGTTGGTTATTGGACATGAGTAATGATTAACAGGGACAGTTGGGGGCATTAGTATTTAATTGTCAGAGGTGAAATTCTTGGATTTATTAAAGACTAACTTATGCGAAAGCATTTGCCAAGGATGTTT	Eukaryota;Alveolata;Ciliophora;Oligohymenophorea;Scuticociliatia_1;Philasterida;Entorhipidium	0.853472	0	0	0	0	0	0	0	0	0	0	0	0	0	0	0	0	0	0	0	0	0	0	0	0	0	0	66	0	0	0	0	0	0	0	0	0	0	0	0	0	0	0	0	0	0	0
4677cf095073f4ab7d67f227a83adf26	AGCTCCAATAGCGTATATTAAAGTTGTTGCAGTTAAAAAGCTCGTAGTTGAAGCCAAGGAAAGCGGACGAAGGTCTTTACCGGTGTCCGTATTTCCACTTTTCGCACAGACGCCTCTACATATTAATTTATGTGGTGGTTGAGTTGCGTCGTTTACTGTGAACAAATTAGGGTGTTTAAAGCAGGCCTACGTTTGAATACACTAGCATGGAATAATAAGATATGACCAAAGTAGTATTTTGTTGGTGACCACTATGGTAATGATTGAAAGAAACTGTTGTGGGTATTCGTATGAGCATGTCAGAGGTGAAATTCTTGGATTTTGATCAGACGAACTACTGCGAAAGCATTTACCAAGGATGTTT	Eukaryota;Stramenopiles;Sagenista;Labyrinthulomycetes;Labyrinthulales;Labyrinthulaceae;Labyrinthula;Labyrinthula_sp.;	0.922429	0	0	0	0	0	0	0	0	0	0	0	0	0	0	0	0	0	0	0	0	0	0	0	0	0	0	0	0	87	0	0	0	0	0	0	0	0	0	0	0	0	0	0	0	0	0
46d9224922319a70d97e54f44858f69f	AGCTCCAATAGCGTATATTAAAGTTGTTGCAGTTAAAAAGCTCGTAGTTGAAGTTCTGATTGCTCAGGCTCTCAGCCTCAGGCGGGAGTTCTGACAGTCATCCGCTTGCAAGCATATGTTCGGCCTTAACAAGCTGGCTATGTGAGTAAGCATTTTACCTTGAGAAAAACAGAGTGTTCCAGGCAGGTTTGTCCGGGATGCATTAGCATGGAATAATAGAACATGACTGAAGTCTATTTATTGGTTTAAGGCTTTAGTAATGATTAATAGGAACAGTCGGGGGCATTCGTACTCAGCAGTCAGAGGTGAAATTCTAAGATTTGCTGAAGACGAACTAATGCGAAAGCATTTGCCAAGGATGTTT	Eukaryota;Alveolata;Ciliophora;Oligohymenophorea;Peritrichia_2;Sessilida;Pseudovorticella;Pseudovorticella_paracratera;	0.996129	0	0	0	0	0	0	0	0	0	0	0	0	0	0	0	0	0	0	0	0	0	0	0	0	0	0	0	0	0	0	0	0	0	0	0	0	0	0	0	0	0	0	0	0	0	0
46e66a7fba3d976bc66803e985e5747e	AGCTCCAATAGCGTATACTAAAGTTGTTGCAGTTAAAAAGCTCGTAGTTGAATTTCTGGTCGTGACAGCTGGTCCGCTCCTAACGGGGTGTGTACCTGGTTGTGGCGTCCATCCTCGGGGAGAGCATATCTGGCATTCACTTGTCGGGTATGGGACCCTCGTCATTTACTGTGAGCAAAATAGAGTGTTCAAAGCAGGCTTAGGCCGTTGAATACATTAGCATGGAATAATAAAATAAGACCTCGGTTTATTTTGTTGGTTTGTATTCCAAGGTAATGATTAATAGGGATAGTTGGGGGTATTCGTATTCAATTGTCAGAGGTGAAATTCTTGGATTTATGGAAGACGAACTACTGCGAAAGCATTTACCAAGGATGTTT	Eukaryota;Stramenopiles;Ochrophyta;Chrysophyceae;Chrysophyceae_X;Chrysophyceae_XX;Chrysophyceae_XXX;Chrysophyceae_XXX_sp.;	0.844251	0	0	0	0	0	0	0	0	0	0	17	0	0	0	0	0	23	25	0	49	0	0	0	0	0	0	176	0	0	0	0	0	0	0	0	0	312	0	14	33	0	0	0	0	0	0
46f175a8743754b38f23871a84ae2860	AGCTCCAATAGCGTATATTAAAGTTGTTGCAGTTAAAAAGCTCGTAGTTGAAGTTCTGATTGTTCAGGCCCTCAGCCTTAGGCGAGGGTGCTGACAGTCATCCGCTTGCAAATATAAGTTCGATCTTCACCGGTTGGCTATATGAGCAGGCATTTTACCTTGAGAAAAACAGAGTGTTCCAGGCAGGTTTGTCCGGAATGCATTAGCATGGAATAATAGAACATGACTGAAGTCTATTTATTGGTTTAAGGCTACAGTAATGATTAATAGGAACAGTCGGGGGCATTCGTACTCAGCAGTCAGAGGTGAAATTCTAAGATTTGCTGAAGACGAACTAATGCGAAAGCATTTGCCAAGGATGTTTTCATCGATCAAGAACGAAAG	Eukaryota;Alveolata;Ciliophora;Oligohymenophorea;Peritrichia_2;Sessilida	0.999999	0	0	0	0	0	0	0	0	0	0	0	0	0	0	0	0	0	0	0	0	0	0	0	0	0	0	0	0	0	0	0	0	0	0	0	0	0	0	0	0	0	3	0	0	0	0
47b7528b1723c2cc86f27eff0e79fac9	AGCTCCAGAAGCGTATGCTAACGTTGTTGCAGTTAAAAAGCTCGTAGTTGAAGGTTTGTCGGTTGGGTCTGTGGGGTGAATGCTCTGTAGATCGGCCTTTTTCTTTTCCTGGCTCTCTCTTTGGGGGGGCCTCGTTCACTGTAAACAAATTGGAGTGCTCCACGCAGGTCGTTGGGACCTGGACAATTGTTATGGGATGATGAGATAGGGCTCGGGCACTATTTTGTCGGTTTGCATGCCTGGGTAATGGTGAATAGGAACAGTTGGGGATATTCGTATTTAGCGGTCAGAGGTGAAATTCTTGGATTCGGGAAAGACGAACAACTGCGAAGGCATTTATCAAAGATGTTT	Eukaryota;Stramenopiles;Sagenista;Labyrinthulomycetes;Thraustochytriales;Thraustochytriaceae;Thraustochytriaceae_X;Thraustochytriaceae_X_sp.;	0.95829	0	0	0	0	0	0	0	0	0	0	0	0	0	0	0	56	0	0	0	0	0	0	0	0	0	0	0	0	0	0	0	0	0	0	0	0	0	0	0	0	0	0	0	0	0	0
47e0f97f1098515311ed31c7cf6559fb	AGCTCCAATAGCGTATATTAAAGTTGTTGCAGTTAAAAAGCTCGTAGTTGGATTTCAAGAAACGCACGGAGAAATCTGTTGCTTTCTACCGGTCATTGACCGTTACTGTGAGAAAATTAGAGTGTTTCAAGCAGGCGATTGCAGGAATACATTAGCATGGAATAACGAATGTGTCTACAATTTGGTTGATTGTAGATTACGATTAATAGGGACAGTTGGGGGCATTAGTATTTAATTGTCAGAGGTGAAATTCTTGGATTTGTTAAAGACTAACGTATGCGAAAGCATTTGCCAAGGATGTTT	Eukaryota;Alveolata;Ciliophora;Litostomatea;Haptoria_5;Pleurostomatida;Amphileptus;Amphileptus_aeschtae;	0.812638	0	0	0	0	0	0	0	0	0	0	0	0	0	0	0	0	0	0	0	0	0	0	0	0	0	0	0	0	0	0	0	0	0	0	0	0	0	0	0	0	0	0	49	0	0	22
47e1eb217f6e66b416c46c5776c4555e	AGCTCCAATAGCGTATATTAAAGTTGTTGCGGTTAAAAAGCTCGTAGTTGGAGTTCTGCCAGGTGACGCTCGTCCGCCCAAGTGGTGTGTACAGGGCGTGCATCTGGCCCTTTCAAGGGGAACGTGTCTGCACTTTACTGTGTGGTGCGAGATCCTTGACTTTTACTTTGAGGAAATCAGAGTGTTCCAAGCAGGCTCTCGTCGTGTATAGCTCAGCATGGAATAATAGCATTGGACTTCGTTTCTAAGCTGTTGGTTGCAAGAAGCGAGGTAATGATGAAGAGGGATAGTTGGGGGCATTCGTATTTAACTGTCAGAGGTGAAATTCTTGGATTTGTTAAAGACGGACTACTGCGAAAGCATCTGCCATGGATGTTT	Eukaryota;Alveolata;Dinoflagellata;Syndiniales;Dino-Group-I;Dino-Group-I-Clade-1;Dino-Group-I-Clade-1_X;Dino-Group-I-Clade-1_X_sp.;	1	0	0	0	0	0	0	0	0	0	0	0	0	0	0	0	0	0	0	0	0	0	0	0	0	0	0	0	0	20	6	0	0	0	0	0	0	0	0	0	0	0	0	0	0	0	0
47f0c4e6ac886afceb99d0362f029a87	AGCTCTAATAGCGTATATTAAAGTTGTTGCAGTTGAAAAGCTCCTCGTTGAATTTTTAGTAAGATTGTGTTGGTGTTTGCGGGGCAACCTGTATAATACTGCCGTCTTATTACTTTTACAAGTAACTATGCTATGCAATTAATTTTGTGTAGTTTTAGTCTTGTTCTTTTACTTTGAGTAAATTAGAGTGTTCAAAGCAGTCTCTTTGGACTTATTAATGAATACCATTAGCATGGGATAATAGAATAGGAATTTTAAACTTGTTTTACTATTGGTTTTAGTTTAAAATTAATGATTAATAGGGATAGTTGGGGGTATTTGTATTTAATTGTCAGAGGTGAAATTCATGGATTTTTGAAAGACAAACTTCTGCGAAAGCATTTATCAAGGATGTTT	Eukaryota;Opisthokonta;Fungi	0.842063	0	0	0	0	0	0	0	0	0	0	0	0	0	0	0	0	0	0	0	0	0	0	0	0	0	0	0	0	0	0	0	0	0	0	0	0	0	0	0	0	0	0	0	16	0	0
47fd31f3aa887a1073e4591beef6f364	AGCTCCAATAGCGTATATTAAAGTTGTTGCAGTTAAAAAGCTCGTAGTTGGATTTCTGGGAGAGTGCCGATGTCGGCCGCGCGCTTGTGCAGAGGCGCTCTTCCATCCTTCTGTTAACGTCTCTTGGCATTCATTTGCTGGTTTCGGGCTCAGATATTTTACCTTGAGAAAATTAGAGTGTTTCAGGCAGGCTTGCGCCGGAATACATTAGCATGGAATAATAGAATAGGACTTTTGTCTCCTTTGTTGGTTTGAGGGACTGAAGTAATGATTAATAGGGATAGTTGGGGGCATTAGTATTTAATTGTCAGAGGTGAAATTCTCGGATTTGTTAAAGACTAACTTATGCGAAAGCATTTGCCAAGGATGTTT	Eukaryota;Alveolata;Ciliophora;Spirotrichea;Hypotrichia;Oxytrichidae;Hemigastrostyla;Hemigastrostyla_enigmatica;	0.988897	0	0	0	0	0	0	0	0	0	0	0	0	0	0	0	0	0	0	0	0	0	0	0	0	0	0	0	0	0	0	0	0	0	0	0	0	0	0	0	0	0	0	0	0	0	0
4803820e6beadac27f50d02ea1725637	AGCTCCAATAGCGTATATTTAAGTTGTTGCAGTTAAAAAGCTCGTAGTTGGATTTCGGATGGGATCTGCCGGTCCGCCTTTGAGGTGTGTACTGGTAGGTCCTATCTTGTTGTCGGGGACTAGCTCCTGGGCTTCACTGTCCGGGACTAGGAGCCGACGAAGTTACTTTGAGTAAATTAGAGTGTTCAAAGCAAGCCTACGCTCTGAATATATTAGCATGGAATAACACGATAGGACTCTGGCTTATCTTGTTGGTCTGTGAGACCAGAGTAATGATTAAGAGGGACAGTCGGGGACATTCGTATTTCATTGTCAGAGGTGAAATTCTTGGATTTATGAAAGACGAACTTCTGCGAAAGCATTTGTCAAGGATGTTT	Eukaryota;Archaeplastida;Chlorophyta;Chlorodendrophyceae;Chlorodendrales;Chlorodendraceae;Chlorodendrales_XX;Chlorodendrales_XX_sp.;	0.859394	0	0	0	0	0	0	0	0	0	0	0	0	0	0	0	0	0	0	0	0	0	0	0	0	0	10	0	0	15	35	0	0	0	0	0	0	0	0	0	0	0	0	0	0	0	0
483c46718d39519bee11a391ee79e64c	AGCTCCAATAGCGTATATTAAAGTTGTTGCAGTTAAAAAGCTCGTAGTTGGACTTGTGGTGGTTCCTGGGGTCCAAATCTTGGTACCTCTGGGGACTGCCATCCTTGGGTGGATCTCGTGTGGCATTAGGTTGTCGTGCGGGGGATGCCCATCGTTTACTGTGAAAAAATCAGAGTGTTCAAAGCAGGCTTATGCCGTTGAATGTATTAGCATGGAATAATGAGATAGGACCTTGGTACTATTTTGTTGGTTTGCGCACCGAGGTAATGATTAATAGGGACAGTTGTGGGTATTCGTATTCCATTGTCAGAGGTGAAATTCTTGGATTTCTGGAAGACGAACTAATGCGAAAGCATTTACCAAGGATGTTT	Eukaryota;Stramenopiles;Ochrophyta;Bacillariophyta;Bacillariophyta_X;Raphid-pennate;Halamphora;Halamphora_sp.;	0.789482	0	0	0	0	0	0	0	0	0	0	0	0	0	0	0	0	0	0	0	0	0	0	0	0	0	0	0	56	0	0	0	0	0	0	0	0	0	0	0	0	0	0	0	0	0	0
489d0b8823c197d30ae524ec924bf165	AGCTCCAATAGCGTATATTAAAGTTGTTGCAGTTAAAAAGCTCGTAGTTGAACTTCTGTACATTCCCGGTGCCGGCTCTTGTCGAACCGTGGAGTGTGCATCCGCTTACAAACTTAGACCGGTCTTCATTGGTCGACTAAGGGAGTAGGCCCTTTACTTTGAAAAAATTAGAGTGTTTCAAGCAGGCAATGGCTCGAATACATTAGCATGGAATAATGGAATAGGACTGAGGTCCATTTGGTTGGTTATTGGACTTTAGTAATGATTAACAGGGACAGTTGGGGGCATTAGTACTTAACAGTCAGAGGTGAAATTCTTGGATTTGTTAAAGACTAACTTATGCGAAAGCATTTGCCAAGGATGTTTTCATCAATCAAGAACGAAAG	Eukaryota;Alveolata;Ciliophora;Oligohymenophorea;Scuticociliatia_1;Philasterida;Metanophrys;Metanophrys_sinensis;	0.999958	0	0	0	0	0	0	0	0	0	0	0	0	0	0	0	0	0	0	0	0	0	0	0	0	0	0	692	0	0	0	0	0	0	0	0	0	0	0	0	0	0	0	0	0	0	0
48ce225a4968b316ebb26dbe78aeede6	AGCTCCAATAGCGTATATTAAAGTTGTTGCAGTTAAAAAGCTCGTAGTTGGACCTTGGGCCTGGACGGGCGGTCCGCCTCACGGCGTGTACTGTCTTGCCGGGCCTTTCCTCTTGGTGATCTGTTGTTTCGGCAGCAGGGAACCAGGACCTTTACTTTGAAAAAATTAGAGTGTTCAAAGCAGGCTCGACGCCGGAATATATTAGCATGGAATAATAAAATAGGACGTGCGGTTCTATTTTGTTGGTTTTTGGAATCGCCGTAATGATTAATAGGGACAGTCGGGGGCATTAGTACTCACATGCTAGAGGTGAAATTCTTGGATTTTGTGAAGACTAACTTCTGCGAAAGCATTTGCCAAGGATGTTT	Eukaryota;Opisthokonta;Fungi;Basidiomycota;Ustilaginomycotina;Exobasidiomycetes;Malassezia;Malassezia_globosa;	0.964466	0	0	0	0	0	0	0	0	0	0	0	0	0	0	0	0	0	0	0	0	0	0	61	0	0	0	0	0	0	11	0	89	0	0	0	0	0	0	0	0	0	0	0	0	0	0
496f019f390cfd2ac455a0442ae5d982	AGCTCCAATAGCGTATATTTTAGTTGTTGCAGTTAAAAAGCTCGTAGTTGAATTTCTGGTGGGGGAATGCAGTTCAACCAATGGTTGATACTTGCACTCTCCGGCCATCTTTGAGTGGAGCCTGTCTGGCATTAAGTTGTCGGGCTGGGGATGCTCATCGTTTACTGTGAAAAAATTAGAGTGTTCAAAGCAGACTTATGTCGTTGAATATATTAGCATGGAATAATAAGATAGGACCGCAGTGCTATTTTGTTGGTTTGCGCACCGTGGTAATGATGAATAGGGACAGTTGTGGGTATTCGTATTCACTTGTAAGAGGTGAAATTCTTAGATTAAGGGAAGACGAACTACTGCGAAAGCATTTACCAAGGATGTTT	Eukaryota;Stramenopiles;Ochrophyta;Bacillariophyta;Bacillariophyta_X;Polar-centric-Mediophyceae;Chaetoceros;Chaetoceros_decipiens;	0.929046	0	0	0	0	0	0	0	0	0	0	0	0	0	0	0	0	0	0	0	0	0	0	0	0	0	0	0	28	0	0	0	0	0	0	0	0	0	0	0	0	0	0	0	0	0	0
497e99eb8cb98031505b1d0f7fa01609	AGCTCCAGTAGTGTATATCAAAGTTGTTGCGGTTAAAAAGCTCGTAGTTGGATTTTTCGGACTTCCGATCGCGACTGTGGTCTTTGAACTGCGGGGTGATTGGGGCCGGTGCTTCTGCACTTTCGGGTGTGGGGGATGTACTTTGAACAAATTAGAGTGCTTAAGACAGGCGATATTATTTTGCGCTGTGAATAGATTAGCATGGAATACGGGTATAGACTCTCTTCTCGGGATTGTTGTTTTGACGAGGAGGGGGAATGATGGATAGGGACAGGTGTGGGCATTGAGATTGTTTCGTCAGAGGTGAAATTCTTAGATCGGAGCAGGATTAGCAGACGCGAAAGCATTTGTCAAGGATGTTT	Eukaryota;Apusozoa;Apusomonadidae;Apusomonadidae_Group-2;Apusomonadidae_Group-2B;Apusomonadidae_Group-2B_X;Apusomonadidae_Group-2B_XX;Apusomonadidae_Group-2B_XX_sp.;	0.999989	0	0	0	0	0	0	0	0	0	0	98	66	0	0	0	0	0	0	0	0	0	0	0	0	0	0	0	0	0	0	0	0	0	0	0	0	0	0	0	0	0	0	0	0	0	0
498902835ecb05e47f894e7995ebfcdc	AGCTCCAATAGCGTATATTAAAGTTGTTGCAGTTAAAAAGCTCGTAGTCTGACCTATGGCCGGCGCTGAACGTCCGGGGCCTTTTCATTGGCCTCGCGTACGTGATATGCGCCCGGCTCATCTTTTGTACTTCGGAGGAACTCGCGTCCTTTTCATTAAGTGCGCGGTGGGATTCCGATAGTTTACTTTGAGAAAAATAGAGTGTTCAAAGCAGGCGATTGCCTTGAATACATTAGCATGGGATAATGGAATAGGACATTGGTTCTATTTTGATGGTTTAAGGACCGATGTAATGATTAATAGGGACGGTTGGGGACATTCATATTCCATGGCTAGAGGTGAAATTCTTGGATTCATGGAAGATGAACTGCTGCGAAAGCGCCTGTCAAAGACGTTT	Eukaryota;Hacrobia;Centroheliozoa;Centroheliozoa_X;Centroheliozoa_XX;Centroheliozoa_XXX;Centroheliozoa_XXXX;Centroheliozoa_XXXX_sp.;	0.971481	0	0	0	0	0	0	0	0	0	0	0	0	0	0	0	0	0	0	0	0	0	0	0	0	0	0	0	0	0	0	0	0	0	0	0	7	0	0	0	0	0	0	0	0	0	0
499a80f0e197fb67c7ef5fcd39260753	AGCTCCAGTAGCGTATATTTAAGTTGTTGTAATTAAAAAGCTCGTAGTTTAAGTGCGAGTAGGTGATTGTTCGGGGGTGAAATAAATTCATTCACGGGTGATTGCTGCTCCTAAGTGAGTAATCAACACTTCATATAATTGAAAGATTATGCGTTGCTCGTTATTACTCATATTACCATAAGTAAAATAGAGTGTTTAAAGCAGAACGTTTGTTCATTGAATAATAGAGTATGGGATAATAGAAGATGAAAGAGGTAGGATGTATTCTCCAGTGGTGGCAACATCATTGGGTCCTGCTTCTTTAATGATTAATAGGGACAATTGGGGCAATTAATATTTCTACACGAGCGGTGAAATGCGTAGACTGTAGAAAGATTAACTAATGCGAAAGCATTTTGC…	Eukaryota;Amoebozoa;Lobosa;Lobosa_X;Himatismenida;Cochliopodiidae;Cochliopodium;Cochliopodium_bilimbosum;	0.899729	0	0	0	0	0	0	0	0	0	0	0	0	0	0	0	0	0	0	0	0	0	0	0	0	0	0	0	0	0	0	0	0	0	0	0	0	0	0	2	0	0	0	0	0	0	0
49cf43ad0888a1e9a7c2525a07c53343	AGCTCCAATAGCGTATATTAAAGTTGTTGCAGTTAAAAAGCTCGTAGTTGGATTTTTGGTGGCTGATGCGGTCCATCTTGGTACTTGCGTTGGCCGCCATGTTTGGGTGGAACCTGTCTGGCATTAGGTTGTCGGGCAGGGGAGGCTCATCGTTTACTGTGAAAAAATTAGAGTGTTCCAAACAGGCTTATGCCGTTGAATATATTAGCATGGAATAATGGGATAGGACTTTGGTACTATTTTGTTGGTTTGCGCACCGAAGTAATGATTAACAGGGACAGTTGGGGGTATTCGTATTCCATTGTCAGAGGTGAAATTCTTGGATTTCTGGAAGACGAACTACTGCGAAAGCATTTACCAAGGATGTTT	Eukaryota;Stramenopiles;Ochrophyta;Bacillariophyta;Bacillariophyta_X;Raphid-pennate	0.858452	0	0	0	0	0	0	0	0	0	0	0	0	0	0	0	0	0	0	0	0	0	0	0	0	0	0	0	0	0	0	0	0	0	0	0	0	0	0	0	0	0	0	0	0	0	0
4a296c695687c0bc7be689698ecda2ca	AGCTCCAATAGTGTATTTTAACGTTATTGCAGTTAAAAAGCTCGTAGTTGAATTTCTGGGTGGCTGTCTTATCCACGGATCTGAACGGCCAACTCATCCGCGCCGGAAGCTACTACAACATTGTTTAGTGGTGGATGCGTGTTTTACTTTGAAGAAATTAGAGTGTTCCAGGCAGGCTTTGCTTGAATACATCAGCATGGAATAATGGAATAGGACAGGTCAATTTAAATTGGTTATTTGACTTGTAATGATTAACAGGGACAGTTGGGGGCGTTTGTATTCAATAGTCAGAGGTGAAATTCTTGGATTTGTTGAAGACAAACTAATGCGAAAGCATTCGCCAAGGATGTTT	Eukaryota;Alveolata;Ciliophora;Phyllopharyngea;Cyrtophoria_8;Dysteriidae;Trochilia	0.999973	0	0	0	0	0	0	0	0	0	0	0	0	0	0	0	0	0	0	0	0	0	0	0	2	0	0	0	0	0	0	0	0	0	0	0	0	0	0	0	0	0	0	0	0	0	0
4a5831b57b92283d47c288b4c5753468	AGCTCCAATAGCGTATATTAAAGTTGTTGCAGTTAAAAAGCTCGTAGTTGGATTTCTGGTAGGAGCGACCATACCGGACTTGATTGTCCGTGTATTGTGTTGTCTTCAGCCATCCTCGTGGAAAATCTTTCTGGCATTAATTTGTTGGATTGGGGATCCGCGTCATTTACTGTGAAAAAATTAGAGTGTTTAAAGCAGGCATTTTGCTTGAATACATTAGCATGGAATAATAAGATAGGACTTTGGTGCTATTTTGTTGGTTTGCACATCAAGGTAATGATTAACAGAATCAGTCGGGGATATTCGTATGCAAATGTCAGAGGTGAAATTCTTGGATTTTTTACAGACGAACTACTGCGAAAGCATTTATCAAGGATGTTT	Eukaryota;Stramenopiles;Sagenista;Labyrinthulomycetes;Labyrinthulales;Labyrinthulaceae;Labyrinthulaceae_X;Labyrinthulaceae_X_sp.;	0.90439	0	0	0	0	0	13	0	0	0	0	0	0	0	0	0	0	0	0	0	0	0	0	0	0	0	0	0	0	0	0	0	31	0	0	0	0	0	0	0	0	0	0	0	0	0	0
4a9b068a020c2adc82cb8bc752fad337	AGCTCCAATAGCGTATATTAAAGTTGTTGCAGTTAAAAAGCTCGTAGTTGAAGTTCTGATTGTTCAGGCCCTCAGCCTTAGGCGAGGGTGCTGACAGTCATCCGCTTGCAAATATAAGTTCGATCTTCACCGGTTGGCTATATGAGCAGGCATTTTACCTTGAGAAAAACAGAGTGTTCCAGGCAGGTTTGTCCGGAATGCATTAGCATGGAATAATAGAACATGACTGAAGTCTATTTATTGGTTTAAGGCTACAGTAATGATTAATAGGAACAGTCGGGGGCATTCGTACTCAGCAGTCAGAGGTGAAATTCTAAGATTTGCTGAAGACGAACTAATGCGAAAGCATTTGCCAAGGATGTTTTCATTAATCAAGAACGAAA	Eukaryota;Alveolata;Ciliophora;Oligohymenophorea;Peritrichia_2;Sessilida	0.999999	0	0	0	0	0	0	0	0	0	0	0	0	0	0	0	0	0	0	0	0	0	0	0	0	0	0	0	0	0	0	0	0	0	0	0	0	0	0	0	0	0	3	0	0	0	0
4a9e7b4584d98b17ef82be6b2eb8ff92	AGCTCCAATAGCGTATATTAAAGTTGTTGCAGTTAAAAAGCTCGTAGTTGAAGTTCTGGTTGTATGGACCTCTGCACTAGATGCGAAGGCACCAGCAATCATCCGCTTGCAAATACATGTCCTTCTTTAACCGGTAGGCTGTATGAGCAAGCTCTTTACCTTGAGAAAAACAGAGTGCACCAGGCAGGTATGTCCGGAATGCATTAGCATGGAATAATAGAATATGACTGAAGTCGATTTATTGGTTTGAGGCTTTAGTAATGATTAATAGGAACAATCGGGGGCATTGGTACTTGCCAGTCAGAGGTGAAATTCTAAGATTTGGCAAAGACTAACTGATGCGAAAGCGTTTGCCAAGGATGTTT	Eukaryota;Alveolata;Ciliophora;Oligohymenophorea;Peritrichia_2;Sessilida;Zoothamnium_1	0.938687	0	0	0	0	0	0	0	0	0	0	0	0	0	0	0	0	0	0	0	0	0	0	0	0	0	0	0	0	0	0	0	0	0	0	0	0	0	0	0	0	0	0	0	0	0	0
4ac5671b08db99f9620cd699096f9710	AGCTCCAATAGCGTATATTAAAGTTGTTGCAGTTAAAAAGCTCGTAGTTGGATTTGTGGCGGTTGTTGCGGTCCATTTTTGGTACTGCGGCGACTGCCATCCTTGAGTGGATCCTGCGTGGCATTAGGTTGTCGTGCAGGGGATGCTCATCGTTTACTGTGAAAAAATTAGCGCGTTCAAAGCAAGCTTATGCTGTTGAATAGATTAGCATGGAATAATGAGATAGGACCTTGGTACTATTTTGTTGGTTTGCGCACCGAGGTAATGATTAACAGGGACAGTTGGGGGTATTCGTATTCCATTGTCAGAGGTGAAATTCTTGGATTTCTGGAAGACGAACTACTGCGAAAGCATTTACCAAGGATGTTT	Eukaryota;Stramenopiles;Ochrophyta;Bacillariophyta;Bacillariophyta_X;Raphid-pennate;Berkeleya;Berkeleya_rutilans;	0.999997	37	176	70	259	54	2975	88	2972	0	68	27	16	18	18	37	28	16	25	75	74	0	6	0	0	6	0	0	853	0	0	27	11	9	0	7	0	0	0	0	0	0	0	0	16	0	0
4ac975fc2940cb929384780c4817b478	AGCTCCAATAGCGTATATTAAAGTTGTTGCAGTTAAAAAGCTCGTAGTTGAACTTCTGTACATTTTCAGTTCTGGCTTCTGTCAAGCTGAGGGTGTACATCCGCTTGCAAACCTAATCCGGTCTTCACTGATCGACTAGGGGAGTAAGCCCTTTACTTTGAAAAAATTAGAGTGTTTCAGGCAGGCAATGGCTCGAATACATTAGCATGGAATAATGGAATAGGACTTTTGTCCATTTGGTTGGTTATTGGACTTAAGTAATGATTAACAGGGACAGTTGGGGGCATTAGTATTTAATTGTCAGAGGTGAAATTCTTGGATTTATTAAAGACTAACTTATGCGAAAGCATTTGCCAAGGATGTTT	Eukaryota;Alveolata;Ciliophora;Oligohymenophorea;Scuticociliatia_1;Philasterida;Porpostoma;Porpostoma_notata;	0.998277	0	0	0	0	0	0	0	0	0	0	0	0	0	0	0	0	0	0	0	0	0	0	0	0	0	0	0	0	0	0	0	0	6	0	0	0	0	0	0	0	0	0	5	0	0	2
4ae611c43647d83529686b6f3572364b	AGCTCCAATAGCGTATATTAAAGTTGTTGCAGTTAAAAAGCTCGTAGTTGGATTTGTGGCGGTTGTTGCGGTCCATTTTTGGTACTGCGGCGACTGCCATCCTTGAGTGGATCCTGCGTGGCATTAGGTTGTCGTGCAGGGGATGCTCATCGTTTACTGTGAAAAAATTAGCGCGTTCAAAGCAAGCTTATGCTGTTGAATAGATTAGCATGGAATAATGAGATAGGACCTTGGTACTATTTTGTTGGTTTGCGCACCGAGGTAATGATTAACAGGGACAGTTGGGGGTATTCGTATTCCATTGTCAGAGGTGAAATTCTTGGATTTCCGGAAGACGAACTACTGCGAAAG	Eukaryota;Stramenopiles;Ochrophyta;Bacillariophyta;Bacillariophyta_X;Raphid-pennate;Berkeleya;Berkeleya_rutilans;	0.999997	0	0	0	0	0	0	0	0	0	0	0	0	0	0	0	0	0	0	0	0	0	0	0	0	0	0	0	0	0	0	0	0	0	0	0	0	0	0	0	0	0	0	0	0	0	0
4af7f99ea6749f03a09dbb935f9cbcdc	AGCTCCAATAGCGTATATTAAAGTTGTTGCAGTTAAAAAGCTCGTAGTTGAACCTTGGGCCTGGCTGGCCGGTCCGCCTCACCGCGTGCACTGGTTCGGCCGGGCCTTTCCCTCTGGGGAACCGCATGCCCTTCACTGGGTGTGTCGGGGAACCAGGACTTTTACTGTGAAAAAATTAGAGTGTTCAAAGCAGGCCTATGCTCGAATACATTAGCATGGAATAATAGAATAGGACGTTGCGGTTCTATTTTGTTGGTTTCTAGGACCGCCGTAATGATTAATAGGGACAGTCGGGGGCGTCAGTATTCAATCGTCAGAGGTGAAATTCTTGGATCGATTGAAGACTAACTACTGCGAAAGCATTCGCCAAGGATGTTT	Eukaryota;Opisthokonta;Fungi;Ascomycota;Pezizomycotina;Sordariomycetes	0.995997	0	0	0	0	0	0	0	0	0	0	0	0	0	0	0	0	0	0	0	0	0	0	0	0	0	0	0	0	0	7	0	0	0	0	0	0	0	0	0	0	0	0	0	0	0	0
4b154b7bbab5ecfd9252623fb72b8f89	AGCTCCAATAGCGTATATTAAAGTTGTTGCAGTTAAAAAGCTCGTAGTTGGATTTCTGTCTTTTGATAAGCCGTTTAACATTAATTTGTTGTCGCGCAAGTCATAGACATTCTTCTACTCACTAATGGTAACATTAGCGCGGTAGAGCCTTTACTTTGAGAAAATTAGAGTGTTTCAAGCAAGCGTTTGCTTTGAATACTACAGCATGGAATAATACAATAGGACTTCGGACCTATTTGTTGGTTTCTAGGTTTGAAGTAATGGTTAATAGGGACAGTTGGGGGCATTCGTATTCGATAGTCAGTGGTGAAATACTTGGATTTATCGAAGACGAACTACTGCGAAAGCATTTGCCAAAGATGTTT	Eukaryota;Alveolata;Apicomplexa;Colpodellidea;Colpodellida;Colpodellaceae;Colpodella;Colpodella_tetrahymenae;	0.999999	0	0	0	0	0	0	0	0	0	0	0	0	0	0	0	0	0	0	0	0	0	19	0	0	0	0	0	0	0	0	0	0	0	0	0	0	0	0	0	0	0	0	0	0	0	0
4b1a962e324baa823a94544eaa4b3847	AGCTCCAATAGCGTATATTAAAGTTGTTGCAGTTAAAAAGCTCGTAGTTGAAGTTCTGGTAGTATTGGGCTTCTGCACTCGATGCGTAAGTACCAGCTACCATCCGCTTGCAAATACATGTCCTTCCTTCACCGGTAGGCTGTATAAGTAAGCACTTTACCTTGAGAAAAACAGAGTGTTCCAGGCAGGTTTGTCCGGAATGCGTTAGCATGGAATAATAGAATATGACTGAAGTCGATTTATTGGTTTGAGGCTTTAGTAATGATTAATAGGAACAGTCGGGGGCATTAGTACTTGTCAGCTAGAGGTAAAATTCAATGATTTGACAAAGACTAACTGATGCGAAAGCGTTTGCCAAGGATGTTTTCATTAATCAAGAACGAAA	Eukaryota;Alveolata;Ciliophora;Oligohymenophorea;Peritrichia_2;Sessilida;Zoothamnium_1	0.894532	0	0	0	0	0	0	0	0	0	0	0	0	0	0	0	5	0	0	0	0	0	0	0	0	0	0	0	0	0	0	0	0	0	0	0	0	0	0	0	0	0	0	0	0	0	0
4b6cee5460dc21ecc55cfbf0a206a5af	AGCTCCAATAGCGTATATTAAAGTTGTTGCAGTTAAAAAGCTCGTAGTTGGATTTCTGTTTTGAATATTCGGCCGGTTCTCTCTGAGAATGTGTGCTTTTGGATATTCGGGACATTTTTTGCGAGGATGTTTTTCTGTCATTAAGTTGATGGTTAAATAGACTTGCATCGTTTACTGTGAAAAAATTAGAGTGTTTCAAGCAGGCGTTTGCTCATTGAATACATTAGCATGGAATAATAAGATATGACTATGGTGGTCTATTTTGTTGGTTTGCACACCAAAGTAATGATTAATAGGGACAGTTGGGGGTATTCATATTTCAGCGTCAGAGGTGAAATTCTTGGATCGCTGAAAGATGAGCTTAGGCGAAAGCATTTACCAAGGATGTTT	Eukaryota;Stramenopiles;Pseudofungi;Oomycota;Oomycota_X	1	0	0	0	0	0	0	0	0	0	0	0	0	0	0	0	0	0	0	0	0	0	0	0	0	0	0	0	0	0	0	0	10	0	0	0	0	0	0	0	0	0	0	0	0	0	0
4b8a774ed14f98f4981271729a1abadb	AGCTCCAATAGCGTATATTAAAGTTGTTGCAGTTAAAAAGCTCGTAGTTGAATTTCTGGTTTTCTTATATTTGGCTTCTGTCGAGTATAGGAGAATCATCCGCCAGAGAACTATATTCGTCCTTAAGTGGTCGATATGGGGATCTGGCACTTTACTTTGAAAAAATTAGAGTGTTCAAGGCAGGCCATTGCCATGAATATACAAGCATGGAATAATGGAATAGGACTTTGATCCATTTTGTTGGTTATTGGATCTTAGTAATGATTAATAGGGACAGTTGGGGGCATTAGTATTTAATTGTCAGAGGTGAAATTCTTGGATTTATTAAAGACTAACTTATGCGAAAGCATTTGCCAAGGATGTTT	Eukaryota;Alveolata;Ciliophora;CONThreeP;CONThreeP_X;Cryptocaryonidae;Cryptocaryon;Cryptocaryon_irritans;	0.990763	0	0	0	0	0	0	0	0	0	0	0	0	0	0	0	0	0	0	0	0	0	0	0	0	0	0	0	0	0	0	0	0	0	0	0	0	0	0	0	0	0	0	0	0	0	0
4b8e4bc0409e564b0e510ecdc11cac15	AGCTCCAATAGCGTATATTAAAGTTGTTGCAGTTAAAAAGCTCGTAGTTGGATTTGTGGCGTACGGTGTGTTCCGGGCACTTGTTGTCTGAGTAACCTGCTGTTGCCATCCTTGGGTGGAACCTGTGTGGCATTAGGTTGTCGTGCAGGGGATGCCCATCATTTACTGTGAAAAAATTAGAGTGTTCAAAGCAGGCTTATGCCGTTGAATATATTAGCATGGAATAATGAGATAGGACTTTTTTGCTATTTTGTTGGTTTGCGCAAAGAGGTAATGATTAATAGGGACAGTTGGGGGTATTCGTATTCCATTGTCAGAGGTGAAATTCTTGGATTTTTGGAAGACGAACTACTGCGAAAGCATTTACCAAGGATGTTT	Eukaryota;Stramenopiles;Ochrophyta;Bacillariophyta;Bacillariophyta_X;Raphid-pennate;Navicula	0.99956	0	243	119	118	76	103	119	130	174	178	0	0	44	0	0	0	0	0	60	56	0	0	0	147	0	0	24	541	135	51	50	211	142	0	26	0	0	0	0	0	20	0	0	0	0	0
4b9fb6a3817bc0069ce8842e3855d718	AGCTCCTATAGTGTATGCTAAAGTTGTTGCAGTTAAAAGGCTCGTAGTCAAATTTTGGTCTTCGCTGCACCTGTACTATTCTCTTGTAGAATATGTTACAGTGTGCACAGACCATTTTTCTGGATAGCCATTCTGTCCTTCACTGGGTGGTTTGTGTGAACCGGATCATTTACTGTGAGACAATCAGAGTGTTCAAAGCAGGCAATTTGCTTGTATGTTTCAGCATGGAATAATAAGATAAGATTTTGGTTTCATCTTGTTGACTGTGTTTACCAAAGTAATGATTAATAGGGATGATTGGGGGTGTTAGAATTTAGTGGTTAGCGGTGAAATGCGTAGACCCACTAAAGACTATCTTATGCGAAAGCATTCACCAAGGACATTC	Eukaryota;Rhizaria;Cercozoa;Endomyxa;Vampyrellida;Thalassomyxa-lineage;Thalassomyxa-lineage_X;Thalassomyxa-lineage_X_sp.;	1	0	0	0	0	0	0	0	0	0	0	0	0	0	0	0	0	0	0	0	0	0	0	0	0	0	0	0	0	0	0	0	0	0	0	0	0	14	4	0	0	0	0	0	0	0	0
4bcf11aa5f2e7fba11df62c4c60770b5	GGCTCCAATAGCGTATATTAAAGCTGTTGCGGTTAAAAAGCTCGTAGTTGGATTTGAGTCTAGTTGCGGCCGGATTTCCAGGGCTTTGACTCTGGAGCGGGCGTGTAGACTGTATGCGCGCGGGTTCTTTTTGGACTTGCGTGCCTTACTTTGAACAAATTAGAGTGTTTAAAGCAGGCGTTCTTCGCCGTGAATACATTAGCATGGAATAACGTTTTTGACTGGAGCAGGCATGATGTTGTCTTGATGACTGCGCAGTAATGATGGATAGGGACGGTCGGGGACATTCGTATTGCTCCGTCAGAGGTGAAATTCTTAGATTGGAGGAAGACGAGCTGATGCGAAAGCCTTTGTCAAGGACGTTT	Eukaryota;Apusozoa;Apusomonadidae;Apusomonadidae_Group-2;Apusomonadidae_Group-2_X;Apusomonadidae_Group-2_XX;Thecamonas;Thecamonas_trahens;	0.786438	0	0	0	0	0	0	0	0	0	0	0	0	0	0	0	0	0	0	0	0	0	0	0	0	0	0	0	0	0	5	0	0	0	0	0	0	0	0	0	0	0	0	0	0	0	0
4bf9d36f132f3ab0dd88d5480e7f06b5	AGCTCCAATAGCGTATACTAATGTTGCTGCAGTTAAAAAGCTCGTAGTTGGATTTCTGGCTTTGGCGCACCCGGCCCAGCCTTTGGTTTGGGTGCCGGTGTGCGCCGGCCATTCCCTCCAGGCGATCTGTTCTGCCATTAATTTGGTTGGGGCAGGGAGCTTGGTCTTTCACTGTGAATAAATTAGAGTGTTCAAAGCAGGCCGCAGTGCCGTGAATAGCCCAGCATGGAATGATAAGATAGGGCTTCGGGCTTCTTGGCTTTCGGGTCAGGGGGCTTCCCTGTTTTGTTGGTTTTAAGGGCCGGAGTAATGATTGATAGGGAGCGTTGGGGGTGCTAGTATTCAACGGCCAGAGGTGAAATTCTTGGATTCGTTGAAGACTAACATCAGCGAAAGCAT…	Eukaryota;Rhizaria;Cercozoa;Endomyxa;Reticulosida;Filoretidae;Filoreta;Filoreta_tenera;	1	0	0	0	0	0	0	0	0	0	0	0	0	0	0	0	0	0	0	0	0	0	0	0	0	0	0	0	0	0	0	0	0	0	0	0	38	0	0	0	0	0	0	0	0	0	0
4c016d7a7de39e77acf4afa7f9b858c5	AGCTCCAGTAGCGTATATTAAAGTTGTTGCAGTTAAAAAGCTCGTAGTTGGATGTCTGGCGTGGCCCGCCCGGCCCGCCGCCGACAAGGCGGCGAGTGCCGGCGCGAGCCTGCCATCCTTCCGGAGAGCGCGCGTGCCCTTCACTGGGTTGCGCGCGCGGTCTGGATCGTTTACTTTGAAAAAATTAGAGTGTTTAAAGCAGGCTTACGCTTCTGAATACATTAGCATGGAATAATAAGATAGGACTTTGGTTCTATTTTGTTGGTTTCTAGAACTAAAGTAATGATTGATAGGGACAGTTGGGGGTGCTAGTATTTAACGGCCAGAGGTGAAATTCTTGGATTCGTTAAAGACTAACTAATGCGAAAGCATTCACCAAGGATGTCT	Eukaryota;Rhizaria;Cercozoa;Filosa-Granofilosea;Filosa-Granofilosea_X;Massiteriidae;Massisteria;Massisteria_marina;	0.830813	0	0	0	0	0	0	0	0	0	0	0	0	0	0	0	0	0	0	0	0	0	0	0	0	0	0	0	0	0	0	0	0	0	0	0	0	0	0	0	0	0	0	0	5	0	0
4c047048ee6c38b5a1318709a6302e5a	AGCTCCAATAGTGTATCTTAACGTTGTTGCAGTTAAAAAGCTCGTAGTTGAATTTCTGGGGGGGCTGCTTTGGCTAACGCCTGGCGGCCCCTTCATCCGCCTTGGAACCAGGAAGGGTATTTGTTTACTGGCCTGGGGAAGTGGCATTTTACTTTGAAGAAATTAGAGTGTTCATAGCAGGCTATTGCTTGAATATATCAGCATGGAATAATGGAATAGGACATCGTCCGTCTCTTGGTGATTGGACATGTAATGATTAACAGGGACAGTTGGGGGCATTCGTATTCGTTAGTCAGAGGTGAAATTCTTGGATTTGACGAAGACGAACTAATGCGAAAGCATTTGCCAAGGATGTTT	Eukaryota;Alveolata;Ciliophora;Phyllopharyngea;Cyrtophoria_8;Dysteriidae;Dysteria_2;Dysteria_2_sp.;	1	0	0	0	0	0	0	0	0	0	0	0	0	0	0	0	0	0	0	0	0	0	0	0	0	0	21	0	0	0	0	0	0	0	0	0	0	0	0	0	0	0	0	0	0	0	0
4c05bfe368192ccff34227637757ea0d	AGCTCCAATAGCGTATATTAAAGTTGTTGCAGTTAAAAAGCTCGTAGTTGGATTTCTGGTAGAAGCGACCATGCCGGGCTTGATTGTCCGTGCAATGTGTTGTCTTCAGCCATCCTCGTGGAGAGCATTTCTGGCATTAATTTACCGGAGGTGGGACCCACGTCATTTACTGTGAAAAAATTAGAGTGTTTAAAGCAGGCAATTGGCTTGAATACATTAGCATGGAATAATAAGATAGGACTTTGGTGCTATTTTGTTGGTTTGCACATCAAGGTAATGATTAACAGAATCAGTCGGGGATATTCGTATGCAAATGTCAGAGGTGAAATTCTTGGATTTTTTACAGACGAACTACTGCGAAAGCATTTATCAAGGATGTTT	Eukaryota;Stramenopiles;Sagenista;Labyrinthulomycetes;Labyrinthulales;Labyrinthulaceae;Labyrinthulaceae_X;Labyrinthulaceae_X_sp.;	0.985158	0	0	0	0	0	0	0	0	0	0	0	0	29	0	0	0	0	0	0	0	0	0	0	0	0	0	0	0	0	0	0	0	0	0	0	0	0	0	0	0	0	0	0	0	0	0
4c0776a250e49fd214a287ed691c5337	AGCTCCAATAGCGTATATTAAAGTTGTTGCAGTTAAAAAGCTCGTAGTTGGATTTCTGGTAGGAGCGACCATGCCGGGCTTGATTGTCTGTGCAATGTGTTGTCTCCAGCCATCCTCGTGGAGAGCGTTTTTGGCATTAATTTGTCGGAGGCGGGACCCGCGTCATTTACTGTGAAAAAATTAGAGTGTTTAAAGCAGGCAATTGGCTTGAATACATTAGCATGGAATAATAAGATAGGACTTTGGTGCTATTTTGTTGGTTTGCACATCAAGGTAATGATTAACAGAATCAGTCGGGGATATTCGTATGCAAATGTCAGAGGTGAAATTCTTGGATTTTTTACAGACGAACTACTGCGAAAGCATTTATCAAGGATGTTT	Eukaryota;Stramenopiles;Sagenista;Labyrinthulomycetes;Labyrinthulales;Labyrinthulaceae;Labyrinthulaceae_X;Labyrinthulaceae_X_sp.;	0.949287	0	0	0	0	0	0	0	0	0	0	0	0	0	0	0	0	0	0	0	0	0	0	0	0	0	0	0	0	0	0	0	0	0	0	16	0	0	0	0	0	0	0	0	0	0	0
4c28c0595b08f768873d1de37ac43504	AGCTCCAGTAGCGTATATTAAAGTTGTTGCAGTTAAAAAGCTCGTAGTTGGATTTCTGGTAGGAGCGACCATACCGGACTTGATTGTCCGCGTAATGCGTTGTCTCCAGCCATCCTCGTGGAGATTGTTTTTGGCATTAACTTGTCGAATTCGGGACCCGCGTCATTTACTGTGAAAAAATTAGAGTGTTTAAAGCAGGCAATTGGCTTGAATACATTAGCATGGAATAATAAGATAGGACTTTGGTGCTATTTTGTTGGTTTGCACATCAAGGTAATGATTAACAGAATCAGTCGGGGATATTCGTATGCAAATGTCAGAGGTGAAATTCTTGGATTTTTTACAGACGAACTACTGCGAAAGCATTTATCAAGGATGTTT	Eukaryota;Stramenopiles;Sagenista;Labyrinthulomycetes;Labyrinthulales;Labyrinthulaceae;Labyrinthulaceae_X;Labyrinthulaceae_X_sp.;	0.990242	0	0	0	0	0	0	0	0	0	0	0	0	0	0	0	0	16	0	0	0	0	0	0	0	0	0	0	0	0	0	0	0	0	0	0	0	0	0	0	0	0	0	0	0	0	0
4c398f2d9d7c350adc6f67aa3c766655	AGCTCCAATAGCGTATATTAAAGTTGTTGCAGTTAAAAAGCTCGTAGTTGGATTTCTGGTGTCTTTTTGCGTTTCCTTCTTTGCCAGCGAAATGCTGGTGTTGGTCGCAATGGATGCCTTCTTTCTCCACAAATTCGTTGCTGAATCATTAGTTTGGCTCGGTGATGAATGGGGATCATTTACTGTGAAAAAATTAGAGTGTTCAAAGCAAGTATTATTTCTTGAATACATTAGCATGGAATAATAAGATAGGACTTGGGTAATATTTTGTTGGTTTGCATATCCAGGTAATGATTAATAGGAACATATTGGGGATATCTGTATTTTTTAGTCAGAGGTGAAATTCTTGGATTTAAGAAAGACAAACTACAGCGAAAGCATTTATCAAGGATGTTT	Eukaryota;Stramenopiles;Sagenista;Labyrinthulomycetes;Labyrinthulales;Labyrinthulaceae;Labyrinthulaceae_X;Labyrinthulaceae_X_sp.;	0.999981	0	0	0	0	0	0	0	0	0	0	0	0	0	0	0	0	0	0	0	0	0	0	0	0	0	0	0	0	0	6	0	0	0	0	0	0	0	0	0	0	0	0	0	0	0	0
4c40f8ee076014629f267dd7550a66aa	AGCTCCAATAGCGTATATTAATGTTGTTGCAGTTAAAAAGCTCGTAGTTGGATTTGTGGTTGGAGCGTTCGGTCCGACACAGTGTGTGGGTACTTGATCGTTCCGTCCATCTTTGGTTTGAATCTTCGTGGCATTAAGTTGTCGTGGAGGGGAGGGCCATCATTTACTGTGAAAAAATCAGAGTGTTCAAAGCAGGCTTATGCCGTTGAATATATTAGCATGGAATAATGAGATAGGACTTTTTTGCTATTTTGTTGGTTTGCGCAAAGAGGTAATGATTAATAGGGACAGTTGGGGGTATTCGTATTCCATTGTCAGAGGTGAAATTCTTGGATTTTTGGAAGACGAACTACTGCGAAAGCATTTACCAAGGATGTTTTCATCAATCAAGAACGAAAT	Eukaryota;Stramenopiles;Ochrophyta;Bacillariophyta;Bacillariophyta_X;Araphid-pennate;Licmophora;Licmophora_gracilis;	0.990886	0	0	0	0	0	0	0	0	0	0	0	0	0	0	0	0	0	0	0	0	0	0	0	0	0	0	0	0	0	0	0	7	0	0	0	0	0	0	0	0	0	0	0	0	0	0
4c520f5157d2685d857ddc9d9ccf7052	AGCTCCAATAGCGTATATTAAAGTTGTTGCAGTTAAAAAGCTCGTAGTTGGATTTCTGAGGGACAGCAAAGTCGGCCGTGTGCATGTACTGCGCTGGCCCCTCATCCTTCTGTTAACCCTTCTTGGTATTCACTTACTGGTTGGGGGCTCAGATAGTTTACCTTGAGAAAATTAGAGTGTTCCAGGCAGGCTTGCGCCGGAATACATTAGCATGGAATAATAGAAAAGGACTTGGGTCTCCTTTGTTGGTTTGAGGGACTCTAGTAATGATTAATAGGGACAGTTGGGGGCATTAGTATTTAATTGTCAGAGGTGAAATTCTCGGATTTGTTAAAGACTAACTTATGCGAAAGCATTTGCCAAGGATGTTC	Eukaryota;Alveolata;Ciliophora;Spirotrichea;Hypotrichia;Holostichidae;Metaurostylopsis;Metaurostylopsis_struederkypkeae;	1	0	0	0	0	0	0	0	0	0	0	0	0	0	0	0	0	0	0	0	0	0	0	0	0	0	0	0	0	0	0	0	0	0	0	0	0	0	0	0	0	0	0	0	0	0	0
4c7cb5c4cafb41530b5a0b9fee1fab85	AGCTCCAATAGCGTATATTAAAGTTGTTGCGGTTAAAAAGCTCGTAGTTGGATTTCTGCTGAGGACGATCGGTCTGCCCACTGGGTGTGTATCTGGCTCGGCCTTGGCATCTTCTTGGAGAACGCTACTGTACTTGACTGTATGGTGCGGTATCCAAGACTTTTACTTTGAGGAAATTAGAGTGTTTCAAGCAGGCATTCGCCTTGAATACATTAGCATGGAATAATAAGATAGGACCTCGGTTCTATTTTGTTGGTTTCTAGAGCTGAGGTAATTGATTAATAGGGATAGTTGGGGGCATTCGTATTTAACTGTCAGAGGTGAAATTCTTGGATTTGTTAAAGACGGACTACTGCGAAAGCATTTGCCAAGGATGTTT	Eukaryota;Alveolata;Dinoflagellata;Dinophyceae	0.999995	0	0	0	0	0	0	0	0	0	0	0	0	0	0	0	0	0	0	0	0	0	0	0	0	0	0	0	19	0	0	0	0	0	0	0	0	0	0	0	0	0	0	0	0	0	0
4c816eaae89d25d156297f45a8667291	AGCTCCAATAGCGTATATTAAAGCTGTTGCGGTTAAAAAGCTCGTAGTTGGATTTGAGTCTAGTTGCGGCCGGGCTCAGGGCTTTGACTCTGGGGCGGGCGTGTAGACTGTATGCGCGCGGGGAGGCGCAGGGGAATTTCTCTGCGGACCCGTGTGCTTTACTTTGAACAAATTAGAGTGTTTAAAGCAGGCATTTTTTGCCTTGAATACATTAGCATGGAATAACGATTTTGACTGGAGCAGGCATGATGTTGTCTTGATGACTGCGCAGTAATGATGGATAGGGACGGTCGGGGACATTCGTATTGCTCCGTCAGAGGTGAAATTCTTAGATTGGAGGAAGACGAGCTGATGCGAAAGCCTTTGTCAAGGACGTTT	Eukaryota;Apusozoa;Apusomonadidae;Apusomonadidae_Group-1;Apusomonadidae_Group-1_X;Apusomonadidae_Group-1_XX;Amastigomonas;Amastigomonas_debruynei;	0.926145	0	0	0	0	0	0	0	0	0	0	0	0	0	0	0	0	0	0	0	0	0	0	0	0	0	0	0	0	0	0	0	0	0	0	0	0	0	0	0	0	0	0	0	0	0	421
4c8284cda518afede26177443cac657b	AGCTCCAATAGCGTATATTAAAGTTGTTGCAGTTAAAAAGCTCGTAGTTGGATTTGTGGCGTGTGCCGTGGCGTGTCCATTCTTTGGCTCTGCCGCGGCCGCGCCATCCTTGGGTGGAGTCTGTGTGGCATTAGGTTGTCGTGCAGAGGATGCCCATCGTTTACTGTGAAAAAATTAGAGTGTTCAAAGCAGGCTTACGCCGTTGAATATATTAGCATGGAATAATAAGATAGGTCTTGGGTCCTATTTTGTTGGTTTGCGGGCCTTGGAAATGATTAATAGGGACAGTTGGGGGTATTCGTATTCCATTGTCAGAGGTGAAATTCTTGGATTTCTGGAAGACGAACTACTGCGAAAGCATTTACCAAGGATGTTT	Eukaryota;Stramenopiles;Ochrophyta;Bacillariophyta;Bacillariophyta_X;Raphid-pennate	0.992918	0	0	0	0	0	0	0	0	0	0	0	0	0	0	0	0	0	0	0	254	0	0	0	0	0	0	0	0	0	0	0	0	0	0	0	0	0	0	0	0	0	0	0	0	0	0
4c988a5313a08fe5fea2508deb393444	AGCTCCAGTAGTGTATATCAAAGTTGTTGCGGTTAAAAAGCTCGTAGTTGGATTTCCCGGGGCTTAAGGGGTGGGATGTGGTCATTTGAACTGCGGCCGTTCCTTTTCCGGTGGCGGTCTGCGGATTTGTTCCGTGGGGCGCATGTACTTTGAACAAATTAGAGTGCTCAAGACAGGCGATTTTTTATTGCTGTGAATAGATTAGCATGGAATACGGGTATAAACTCTCTTCTCGGGATTGTTGTTTTGACGAGGAGGGGGAATGATGGATAGGGACAGGTGTGGGCATTGAGATTGTTACGTCAGAGGTGAAATTCTTAGATCGTAGCAGGATTAGCAGACGCGAAAGCATTTGTCAAGGATGTTT	Eukaryota;Apusozoa;Apusomonadidae;Apusomonadidae_Group-2;Apusomonadidae_Group-2B;Apusomonadidae_Group-2B_X;Apusomonadidae_Group-2B_XX;Apusomonadidae_Group-2B_XX_sp.;	1	0	0	0	0	0	0	0	0	0	0	0	0	0	0	0	0	0	0	0	0	0	0	0	0	0	0	0	20	0	0	0	0	0	0	0	0	0	0	0	0	0	0	0	0	0	0
4c994fcbdcf9dfb9b98d99d450a43d14	AGCTCCAATAGCGTATATTAAAGTTGTTGCGGTTAAAAAGCTCGTAGTTGGATTTCTGCTGAGGACGATCGGTCCGCCCTCTGGGTGAGTATCTGGCTCGGCCTTGGCATCTTCTTGGAGAACGTTGCTGCACTTGACTGTGTGGTGCGGTATCCAGGACTTTTACTTTGAGGAAATTAGAGTGTTTCAAGCAGGCGCACGCCTTGAATACATTAGCATGGAATAATAAGATAGGACCTTGGTTCTATTTTGTTGGTTTCTAGAGCTGAGGTAATGATTAATAGGGATAGTTGGGGGCATTCGTATTTAACTGTCAGAGGTGAAATTCTTGGATTTGTTAAAGACGGACTACTGCGAAAGCATTTGCCAAGGATGTTT	Eukaryota;Alveolata;Dinoflagellata;Dinophyceae;Gymnodiniales;Gymnodiniaceae;Gymnodinium	0.831873	0	0	0	0	0	0	0	0	0	0	0	0	0	0	0	0	0	0	0	0	0	0	0	0	0	0	0	0	0	0	0	0	0	0	0	0	0	0	0	0	0	0	0	0	0	0
4cb37760ba5ee3d6800c791aa2189ec3	AGCTCCAATAGCGTATATTAAAGTTGTTGCAGTTAAAACGCTCGTAGTTGAACTTTGGTCTTGGCTGGGCGGTCTTGACAATGTCTTGTACTTCTCTGGCTGAGACTTTCCTTCTGGCGAACTATTGTGCTATTTACTTAGTGCGATAGGGAACCAGGACTTTTACTTTGAAAAAATTAGAGTGTTTAAAGCAGGCGTCTGCCCGTATACATTAGCATGGAATAATAAAATAGGACTTTGGTTTTATTTTGTTGGTTTTCGAAACCGAAGTAATGATTAATAGGGATAGTTGGGGGCGTTACTATTCAGGAGTCAGAGGTGAAATTCTTGGATTTCCTGAAGAGTATCTACTGCGAAGGCATTCGCCAAGGATGTTT	Eukaryota;Opisthokonta;Fungi;Chytridiomycota;Chytridiomycotina;Chytridiomycetes;Kappamyces;Kappamyces_sp.;	0.871651	0	0	0	0	0	0	0	0	0	0	0	0	0	0	0	0	0	0	0	0	0	0	0	0	0	0	0	0	0	0	0	0	0	0	0	0	160	157	2	0	0	0	0	0	0	0
4cdcedb0fcd46ef0d84c986b66ac510c	AGCTCCAATAGCGTATATTAAAGTTGTTGCAGTTAAAAAGCTCGTAGTTGGATTTGTGGTTGTCTCGAGGGGCCCGGCATTCGTGCTGGTGCTTTTTCGAGTCGCCATCCTTGGGTGGAATCTGTGTGGCATTAGGTTGTCGTGCAGGGGATGCCCATCGTTTACTGTGAAAAAATTAGAGTGTTCAAAGCAGGCTTATGCCGTTGAATATATTAGCATGGAATAATAAGATAGGACCTTGGTACTATTTTGTTGGTTTGCGCACCAAGGTAATGATTAATAGGGACAGTTGGGGGTATTCGTATTCCATTGTCAGAGGTGAAATTCTTGGATTTTTGGAAGACGAACTACTGCGAAAGCATTTACCAAGGATGTTT	Eukaryota;Stramenopiles;Ochrophyta;Bacillariophyta;Bacillariophyta_X;Raphid-pennate;Nitzschia	0.715422	0	0	0	0	0	0	0	0	0	0	0	0	0	0	0	0	0	0	0	0	0	0	0	0	0	0	0	0	0	0	0	0	0	0	0	0	0	0	0	0	0	0	0	0	0	0
4ce210fb86ac9242d2799c5dbf4210dd	AGCTCCAATAGCGTATATTAAAGTTGTTGCAGTTAAAAAGCTCGTAGTTGGATTTCGGCGATGTGTACGGTGGTCCGCCGCAAGGCGTGCACTGCCGTGATGTCGCTTTTTTTCTCGGCGCCGCCTCGTGCCCTTGATTGGGTGGGGGGATTCTGGAGCCGGGACCTTTACTTTGAAAAAATTAGAGTGTTCAAAGCAGGCGTTTCGCTTGAATAGATTAGCATGGAATAATGGAATAGGACTTTGGTCTTATTTTGTTGGTTTCTAGGACCGAAGTAATGATTAATAGGGACAGTTGGGGGCATTAGTATTTAATTGCTAGAGGTGAAATTCTTGGATTTATGAAAGACTAACTACTGCGAAAGCATTTGCCAAGGATGTTT	Eukaryota;Opisthokonta;Choanoflagellida;Choanoflagellatea;Craspedida;Monosigidae_Group_M;Salpingoeca_M	1	0	0	0	0	0	0	0	0	0	0	0	0	0	0	0	0	0	0	0	0	0	0	0	0	0	0	0	0	0	0	0	0	0	0	0	0	0	0	0	0	0	0	0	0	0	0
4d06e34db8751d08080e1cb393d93337	AGCTCCAATAGCGTATATTAAAGTTGTTGCAGTTAAAAAGCTCGTAGTTGAAGTTCTGGTAGTATTGGGCTTCTGCACTCGATGCGTAAGTACCAGCTACCATCCGCTTGCAAATACATGTCCTTCCTTCACCGGTAGGCTGTATAAGTAAGCACTTTACCTTGAGAAAAACAGAGTGTTCCAGGCAGGTTTGTCCGGAATGCATTAGCATGGAATAATAGAATATGACTGAAGTCGATTTATTGGTTTGAGGCTTTAGTAATGATTAATAGGAACAGTCGGGGGCATTAGTACTTGTCAGCTAGAGGTAAAATTCAATGATTTGACAAAGACTAACTGATGCGAAAGCGTTTGCCAAGGATGTTT	Eukaryota;Alveolata;Ciliophora;Oligohymenophorea;Peritrichia_2;Sessilida;Zoothamnium_1	0.86045	0	0	0	0	0	0	0	0	0	0	0	0	0	0	0	0	0	0	0	324	0	0	0	0	0	0	0	0	0	0	0	0	0	0	0	0	0	0	0	0	0	0	0	0	0	0
4d6e1d4d941539fc98bfbfcc45464549	AGCTCCAATAGCGTATATTAAAGTTGTTGCAGTTAAAAAGCTCGTAGTTGGATTTCGGGATGAGAAGCATGGTCTACCGAAAGGTGTGTACTAGGCGGCTCATTCTTCCTTCTGTAGACCTGTGCGGTTCTTGATTGGATTGTGCAGTGGATGCAGAACGTTTACTTTGAATAAATTAGAGTGTTCAAAGCAGGCATTTGCTTGAATACATTAGCATGGAATAATGGAATAGGACTTTGGTTCTATTTTGTTGGTTTCTAGGACCGAAGTAATGATTAATAGGGATAGTTGGGGGCATTAATATTTAATTGTCAGAGGTGAAATTCTTGGATTTATGAAAGATTAACTTCTGCGAAAGCATTTGCCAAGGATGTTT	Eukaryota;Apusozoa;Hilomonadea;Planomonadida;Planomonadidae;Planomonadidae_Group-1;Ancyromonas;Ancyromonas_micra;	0.884571	0	0	0	0	0	0	0	0	0	0	0	0	0	0	0	0	0	0	0	0	0	0	0	0	0	0	0	0	0	0	0	0	0	0	0	0	0	0	0	0	0	0	0	0	0	0
4dc80069e836db60d43764fb0186608e	AGCTCCAATAGCGTATATTAAAGTTGTTGCAGTTAAAAAGCTCGTAGTTGGATTTTTGGTGGCCACTGCGGTCCAATTTGGTACTTGTGGTGGCTGCCATGTTTGAGTGGAACTTGTCTGGCATTAGGTTGTCGGGCAGGCGATGCTCATTGTTTACTGTGAAAAAATTAGAGTGTTCCAAACAGGCTGATGCCGATGAATATATTAGCATGGAATAATGAGATAGGACTTTGGTACTATTTTGTTGGTTTGCGCACCAAAGTAATGATTAACAGGGACAGTTGGGGGTATTCGTATTCCATTGTCAGAGGTGAAATTCTTGGATTTCTGGAAGACGAACTACTGCGAAAGCATTTACCAAGGATGTTT	Eukaryota;Stramenopiles;Ochrophyta;Bacillariophyta;Bacillariophyta_X;Raphid-pennate;Mastogloia;Mastogloia_sp.;	1	0	0	0	0	0	0	0	7	0	0	0	0	0	0	0	0	0	0	0	0	0	0	0	0	0	0	0	50	0	0	0	0	0	0	0	0	0	0	0	0	0	0	0	0	0	0
4de0f1481f880bffb75224dd9c951300	AGCTCCAATAGCGTATATTAAAGTTGTTGCAGTTAAAAAGCTCGTAGTTGAATTTCTGGTCATTGGCAAGCTTGGCTCCTGTCGGTTTGTCGATGATCATCCGTTTACAAACTTTTTCCGGCCTTCACTGGTTCGACTAAGGGAGTAAACAATTTACTTTGAAAAAATTAGAGTGTTTCAGGCAGGCAATCGCTTGAATACATTAGCATGGAATAATGGAATAGGTCTTTGAGCTATTTCGTTGGTTATTAGTTCAGAGAAATGATTAATAGGATCAGTTTGGGGGCATTAGTATTTAATTGTCAGAGGTGAGATTCTTGGATTTATTAAAGACTAACTTATGCGAAAGCATTTGCCAAGGATGTTT	Eukaryota;Alveolata;Ciliophora;Oligohymenophorea	0.891295	0	0	0	0	0	0	0	0	0	0	0	0	0	0	0	0	0	0	0	0	0	0	0	0	0	0	0	0	0	0	0	0	0	0	0	0	0	0	0	0	0	0	0	0	0	0
4df424175d5288b447e8cf1d8c19f55c	AGCTCCAATAGCGTATATTAATGTTGTTGCAGTTAAAAAGCTCGTAGTTGGATTTCTGGTCGGAACGCCTGGCCGGCTCCGCAAGGGGTCGTTGCATTGGCTGTTTTCGTCCATCCTCAGGGGAACTTGCTCTGGTATTAATTTATCGGTGTAAGGACGCCTGTCGTTTACTGTGAACAAATTAGAGTGTTCAAAGCAAGGTGTACTTGAATACATTAGCATGGAATAATAAGATAGGACTTTGGTGGTTCTTTTTAGATATTTTGTTGGTTTGCACGCCAAAGTAATGATTAATAGGAGCAGTTGGGGGTATTCGTATTCAATTGTCAGAGGTGAAATTCTTGGATTTATAGAAGACGAACTACTGCGAAAGCATTTACCAAGGATGTTT	Eukaryota;Stramenopiles;Ochrophyta;Dictyochophyceae;Dictyochophyceae_X;Pedinellales;Pteridomonas;Pteridomonas_danica;	0.999896	0	0	0	0	0	0	0	0	0	0	0	0	0	0	0	0	0	0	0	0	102	0	0	0	0	0	6	0	0	0	0	0	85	0	0	0	0	0	0	0	0	0	6	0	0	0
4e016507d037bf257da14a4db779cacb	AGCTCCAATAGCGTATATTAAAGTTGTTGCAGTTAAAAAGCTCGTAGTTGAATTTCTAATTAGTTAATTCGGGGTTCACCCGCTTTAGCTAGTTATCCGACACTGAACCATGACGGTTATTAAGTTAACCCCATGGAGAATTGTCATTTTACTTTGAAAAAATTAGAGTGTTTCAGGCAGGCAATTGCCCGAATATCTTAGCATGGAATAATGGAATAGGACTTTGGTTCATTTTATTGGTTATTGAATCAGAGTAATGATTAATAGGGACAGTTGGGGGCATTAGTATTTAATTGTCAGAGGTGAAATTCTTGGATTTATTAAAGACTAACTTATGCGAAAGCATTTGCCAAGGATGTTT	Eukaryota;Alveolata;Ciliophora;Oligohymenophorea;Apostomatia;Foettingeriidae;Synophrya;Synophrya_sp.;	0.884935	0	0	0	0	0	0	0	0	0	0	0	0	0	0	0	0	0	0	0	0	0	0	0	0	0	0	0	5	0	0	0	0	0	0	0	0	0	0	0	0	0	0	0	0	0	0
4e0dbf330e6851a207d5b0c2928130d1	AGCTCCAATAGCGTATATTAAAGTTGTTGCAGTTAAAAAGCTCGTAGTTGAATTTATGATATGGTACGCCTGGTCCGCCCCGTCTAGGTGTGTGAGTACCGGCGCGTGCCTATCATCCTTCTGCGGACCGCGTCTACCCTTGATTGGGCCGGGCGTGGGACGTAGATCGTTTACTTTGAAAAAATTAGAGTGTTTCAAGCAGGCTTACGCCTTGAATACATTAGCATGGAATAATAAGATAGGGCTTTGGTTCTATTTTGTTGGTTTCTAGGACTGAAGTAATGATTGATAGGGATAGTTGGGGGTGCTAGTATTGAACGGCCAGAGGTGAAATTCTTGGATTCGTTCAAGACTAACTAATGCGAAAGCATTCACCAAGGATGTCT	Eukaryota;Rhizaria;Cercozoa;Filosa-Granofilosea;Filosa-Granofilosea_X;Novel-Gran-234;Novel-Gran-234_X;Novel-Gran-234_X_sp.;	0.999999	0	0	0	0	0	0	0	0	0	0	0	0	0	0	0	0	0	0	0	10	0	0	0	0	0	0	0	0	0	0	0	0	0	0	0	0	0	0	0	0	0	0	0	0	0	0
4e11689d8b1ba511d02402af1075c054	AGCTCCAATAGCATATATTAATGTTGTTGCAGTTAAAAAGCTCGTAGTTGGATTTCTGCAGGAGTGCCAATGTCCGCCCACGTGCGTGTGCAGCGGCGCCCCTGCATCCTTCGGTTACCTCCGCTCGGCATTCACTTGCCGGCGGTAGGCTCCGAATATTTACCTTGAGAAAATTAGAGTGTTTCAGGCAGGCTAAGCCGGAATACATTAGCATGGAATAATAGAATAGGACTACGGTCTCGTTGTTGGTTTGAGGGACTGGAGTAATGATTAATAGGGATAGTTGGGGGCATTAGTATTTAATTGTCAGAGGTGAAATTCTCAGATTAACTAAAGACTAACTTATGCGAAAGCATTTGCCAAGGATGTTT	Eukaryota;Alveolata;Ciliophora;Spirotrichea;Strombidiida;Tontoniidae_A;Tontoniidae_A_X;Tontoniidae_A_X_sp.;	0.972892	0	0	0	0	0	0	0	0	0	0	0	0	0	0	0	0	0	0	0	0	0	0	0	0	0	17	0	0	0	0	0	0	0	0	0	0	0	0	0	0	0	0	0	0	0	0
4e147cffdcafacaeaa7122127307bc80	AGCTCCAATAGCGTATATTAAAGTTGTTGCAGTTAAAAAGCTCGTAGTTGAACTTTGGGCTTGGTCAGCCGGTCCGCTTTTTTGCGTGTACTGGTCCTGACCGAGCCTTTCCTTCTGGCTAACCTGTCTCTCGGGGCAGGCGAACCAGGACTTTTACTTTGAAAAAATTAGAGTGTTCAAAGCAGGCCTTTGCTCGAATATATTAGCATGGAATAATAGAATAGGACGTTTGGTTCTATTTTGTTGGTTTCTAGGACCATCGTAATGATTAATAGGGACGGTCGGGGGCATCAGTATTCAATTGTCAGAGGTGAAATTCTTGGATTTATTGAAGACTAACTACTGCGAAAGCATTTGCCAAGGACGTTT	Eukaryota;Opisthokonta;Fungi;Ascomycota;Saccharomycotina;Saccharomycetales;Wickerhamomyces;Wickerhamomyces_anomalus;	0.997265	0	0	0	0	0	0	0	0	0	0	0	0	0	0	0	0	0	0	0	0	29	36	12	47	35	40	31	24	40	15	31	0	27	51	28	36	0	16	42	46	31	55	34	25	48	36
4e2feabced0afee1b407a5b25dfed8d2	AGCTCCAATAGTGTATCTTAATGTTGTTGCAGTTAAAAAGCTCGTAGTTGAATTTCTGGCACTCCGGCTGCCTTCGGGCGTGCATGGGGATGTCATCCGCGTTGGAGCCGTATGCGTGTCAAAACCATGCGGGGAAGGCGCATTTTACTTTGAAGAAATTAGAGTGTTCCAGGCAGGCTATGCTTGAATATTACAGCATGGAATAATGGAATAGGACTTGTCCTTTTCGTTGGTTAAATGGATAAGTAATGATTAACAGGGACAGTTGGGGGCATTCGTATTGGGCAGTCAGAGGTGAAATTCTTTAATTTGCTCAAGACGCACTAATGCGAAAGCATTTGCCAAGGATGTTT	Eukaryota;Alveolata;Ciliophora;Phyllopharyngea;Cyrtophoria_7;Hartmannulidae;Hartmannulidae_X;Hartmannulidae_X_sp.;	0.852193	0	0	0	0	0	0	0	0	0	0	0	0	0	0	0	0	0	0	0	0	0	0	0	0	0	0	0	0	0	0	0	0	0	0	0	0	0	0	0	0	0	0	0	0	0	0
4e4aa8aa35f2168908f834ede1c96840	AGCTCCACTAGCGTATATTAAAGTTGTTGCAGTTAAAAAGCTCGTAGTTGAACTTCTGATTGTTGCTTGAGTCGGTATTTATATCGCTCTAGCGGCAGTCATCCGTCTGCAAACTTTTACATCCTTAACTGGTTTGTCTAAGGGAGCAGGCATTTTACTTTGAAAAAATTAGAGTGTTTAAGGCAGGCGCAAGCCTGAATACATTAGCATGGAATAATGGAATAGGACGCTTGTCCATTTGATTGGTTATTGGACTCGCGTAATGATTAATAGGGACAGTTGGGGGCATTAGTATTTAATTGTCAGAGGTGAAATTCTTGGATTTATTAAAGACTAACTTATGCGAAAGCATTTGCCAAGGATGTTT	Eukaryota;Alveolata;Ciliophora;Oligohymenophorea;Scuticociliatia_2;Scuticociliatia_2_X;Cyclidium_3;Cyclidium_glaucoma;	0.987731	0	0	0	0	0	0	0	0	0	0	0	0	0	0	0	0	0	0	0	0	0	0	0	0	0	0	9	0	0	0	0	0	0	0	0	0	0	0	0	0	0	0	0	0	0	0
4e7e9c7f571a830463d523dd1f458578	AGCTCCAATAGCGTATATTAAAGTTGTTGCAGTTAAAAAGCTCGTAGTTGGATTTGTGGGCGGGGTGGCGGGCCGGTGCGCTTCGTGCGCTGCCGTGCATTCCGCGAAGCCCTGAGCCCAGATTCACGCGGGGCCGCGTTGCCATTCGTTTGGCGGCGCGGGTCGTTCCGCGTGTCGTTTACTGTGAAAAAATTAGAGTGTTCAAAGCAGGCGTGTTGGCCGTGAATACATTAGCATGGAATAATGAGATAGGACTTTGGTGCTATTTTGTTGGTTTGTGTGCCGAGGTAATGATTAACAGGGACAGTTGTGGGTATTCATATTTGATTGTCAGAGGTGAAATTCTTGGATTTATCAAAGATGAACGAGTGCGAAAGCATTTACCAGGGATGTTT	Eukaryota;Stramenopiles;Opalozoa;Placidideae;Placidiales;Placidiales_X;Placidia;Placidia_cafeteriopsis;	1	0	0	0	0	0	0	0	0	0	0	0	0	0	0	0	0	0	0	0	0	0	0	0	0	0	0	0	0	0	0	0	0	0	0	0	0	0	0	0	0	0	0	0	4	0	0
4e85edb3b723a32b5a38c45b2b5d4672	AGCTCCAATAGCGTATATTAAAGTTGTTGCAGTTAAAAAGCTCGTAGTTGGATTTCTGGTGATAATGACCATCCATGACTTGATTGTCGTTGTGATGTGTTGTTTATTACCATCCTCGTAGAGATTGTTTCTGGCATTAATTTGTTGGATTCAGGACCTACGTCATTTACTGTGAAAAAATTAGAGTGTTTAAAGCAGGCAATTGGCTTGAATACATTAGCATGGAATAATAAGATAGGACTTTGGTGCTATTTTGTTGGTTTGCACATCAAGGTAATGATTAACAGAAACAGTCGGGGATATTAGTATGTAAATGTCAGAGGTGAAATTCTTGGATTTTTTACAGACTAACTACTGCGAAAGCATTTATCAAGGATGTTT	Eukaryota;Stramenopiles;Sagenista;Labyrinthulomycetes;Labyrinthulales;Labyrinthulaceae;Labyrinthulaceae_X;Labyrinthulaceae_X_sp.;	0.991148	0	0	0	0	0	0	0	15	0	0	0	0	0	0	0	0	0	0	0	0	0	0	0	0	0	0	0	6	0	0	0	0	0	0	0	0	0	0	0	0	0	0	0	0	0	0
4e98302514f2e0132a2a21b20a73fd91	AGCTCCAATAGCGTATATTAAAGTTGTTGCAGTTAAAAAGCTCGTAGTTGGATTTGTGGCGTGTGCCGTGGCCGCGCCATCCTTGGGTGGAGTCTGTGTGGCATTAGGTTGTCGTGCAGAGGATGCCCATCGTTTACTGTGAAAAAATTAGAGTGTTCAAAGCAGGCTTACGCCGTTGAATATATTAGCATGGAATAATAAGATAGGTCTTGGGTCCTATTTTGTTGGTTTGCGGGCCTTGGAAATGATTAATAGGGACAGTTGGGGGTATTCGTATTCCATTGTCAGAGGTGAAATTCTTGGATTTCTGGAAGACGAACTACTGCGAAAGCATTTACCAAGGATGTTT	Eukaryota;Stramenopiles;Ochrophyta;Bacillariophyta;Bacillariophyta_X;Raphid-pennate	0.991218	0	0	0	0	0	0	0	0	0	0	0	0	0	0	0	0	0	0	0	0	0	0	0	0	0	0	0	0	0	0	0	0	0	0	0	0	0	0	0	0	0	0	0	0	0	0
4ea68413642f1e97317b99cfb642292f	AGCTCCAGAAGCGTATGCTAACGTTGTTGCAGTTAAAAAGCTCGTAGTTGAAGGTCTGTCGGTTGGGTCCGTTGGGGCGAACGCCTCGCGGGCCGGCCTCTTTTTTCCTTGGCTCTCTCTTTGAGGGGGCCTCTTTCACTGTAAACAAATTGGAGTGCTCCACGCAGGTCGTTGGGACCTGGACAATTGTTATGGGATGATGAGATAGGGCTCGGGCACTATTTTGTCGGTTTGCATGCCTGGGTAATGGTGAATAGGAACAGTTGGGGATATTCGTATTTAGCGGTCAGAGGTGAAATTCTTGGATTCGGGAAAGACGAACAACTGCGAAGGCATTTATCAAAGATGTTT	Eukaryota;Stramenopiles;Sagenista;Labyrinthulomycetes;Thraustochytriales;Thraustochytriaceae;Thraustochytriaceae_X;Thraustochytriaceae_X_sp.;	0.742995	0	0	0	0	0	0	0	0	0	0	0	0	0	0	0	0	0	0	0	0	0	0	0	0	0	0	0	0	0	0	0	140	0	0	0	0	0	0	0	0	0	0	0	0	0	0
4ea7cc84bf979c83a027236a8eabebc8	AGCTCCAATAGCGTATACTAATGTTGCTGCAGTTAAAAAGCTCGTAGTTGGATTTCTGGCTTTGGCGCACCCGGCCCAGCCTTTGGTTTGGGTGCCGGCGTGCGCCGGCCATTCCCTCCAGGCGATCTACTCTGCCATTGATTTGGTTGGGGTAGGGAGCTTGGTCTTTCACTGTGAATAAATTAGAGTGTTCAAAGCAGGCCGCAGTGCCGTGAATAGCCCAGCATGGAATGATAAGATAGGGCTTCGGGTTCAGTGGGTCTTCGGGCTCCTGGACTTCCCTGTTTTGTTGGTTTTAAGGGCCGGAGTAATGATTGATAGGGAGCGTTGGGGGTGCTAGTATTCAACGGCCAGAGGTGAAATTCTTGGATTCGTTGAAGACTAACATCAGCGAAAGCA…	Eukaryota;Rhizaria;Cercozoa;Endomyxa;Reticulosida;Filoretidae;Filoreta;Filoreta_tenera;	1	0	0	0	0	0	0	0	0	0	0	0	0	0	0	0	0	0	0	38	0	0	0	0	0	0	0	0	0	0	0	0	0	0	0	0	0	0	0	0	0	0	0	0	79	0	0
4ec1380ddcd87a3b86d4a98eeed94fea	AGCTCCAATAGCGTATATTAAAGTTGTTGCAGTTAAAAAGCTCGTAGTTGGATTTGTGGCGTGTGCCGTGGCGTGTCCATTCTTTGGCTCTGCCGTGGCCGCGCCATCCTTGGGTGGAGTCTGTGTGGCATTAGGTTGTCGTGCAGAGGATGCCCATCGTTTACTGTGAAAAAATTAGAGTGTTCAAAGCAGGCTTACGCCGTTGAATATATTAGCATGGAATAATAAGATAGGTCTTGGGTCCTATTTTGTTGGTTTGCGGGCCTTGGAAATGATTAATAGGGACAGTTGGGGGTATTCGTATTCCATTGTCAGAGGTGAAATTCTTGGATTTCTGGAAGACGAACTACTGCGAAAGCATTTACCAAGGATGTTT	Eukaryota;Stramenopiles;Ochrophyta;Bacillariophyta;Bacillariophyta_X;Raphid-pennate	0.997123	0	46	0	398	0	308	0	82	25	205	24	0	0	0	297	0	0	2384	139	3709	0	0	0	0	0	0	0	0	0	0	0	0	0	0	0	0	0	0	0	0	0	0	0	0	0	0
4ee445247b912ae15b3938213a452c70	AGCTCCAATAGCGTATATTAATGTTGTTGCAGTTAAAAAGCTCGTAGTTGGATTTCTGACAGGAGCGACCGGTCCGATCCTTTGGGTCGAGTACTTTGTGTTGTCTCTAGTCATCCTTATGGAGAACGCTCGTGGTATTAAGTTATCGTGAGTGGGAACCATATCGTTTACTGTGAAAAAATTAGAGTGTTTAAAGCAGGCAATCGCTGTGAATACGTTAGCATGGAATAATAAGATAGGACTTTGGTACTATTTTGTTGGTTTACATACCAAGGTAATGATTAAGAGGGACAGTTGGGGGTATTCGTATTTAATTGTCAGAGGTGAAATTCTTGGATTTATGAAAGACGAACTACTGCGAAAGCATTTACCAAGGATGTTT	Eukaryota;Stramenopiles;Sagenista;Labyrinthulomycetes;Thraustochytriales;Thraustochytriaceae;Schizochytrium;Schizochytrium_minutum;	0.710639	0	0	0	0	0	0	0	0	0	0	0	59	0	0	0	0	0	0	0	0	0	0	0	0	0	0	0	0	0	0	0	0	1606	0	6	0	0	0	0	0	0	0	103	647	8	7
4f02a77f5b91e8ceea40d3b0324cce99	AGCTCCAATAGCGTATATTAAAGTTGTTGCAGTTAAAAAGCTCGTAGTTGGATTTGTGGCGTTCGCGTGCGTCCCGGCACTCGTGCCGGTGTTTGCTAGCGTCGCCCTCCTTGGGTGGAACCTGTGTGGCATTGAGTTGTCGTGCAGGGGATGCCCATCGTTTACTGTGAAAAAATTAGAGTGTTCAAAGCAGGCTTACGCCGTTGAATATATTAGCATGGAATAATAAGATAGGACCTTGGTACTATTTTGTTGGTTTGCGCACCAAGGTAATGATTAATAGGGACAGTTGGGGGTATTCGTATTCCATTGTCAGAGGTGAAATTCTTGGATTTTTGGAAGACGAACTACTGCGAAAGCATTTACCAAGGATGTTT	Eukaryota;Stramenopiles;Ochrophyta;Bacillariophyta;Bacillariophyta_X;Raphid-pennate;Nitzschia;Nitzschia_communis;	0.728058	0	0	0	0	0	0	0	0	0	0	0	0	0	0	0	0	0	0	0	0	0	0	0	0	0	0	0	161	0	0	0	0	0	0	0	0	0	0	0	0	0	0	0	0	0	0
4f3f1634dd1c7227b153fa1b13b4de2e	AGCTCCAGAAGCGTATGCTAACGTTGTTGCAGTTAAAAAGCTCGTAGTTGAAGGTTTGTTGGTTGGGTCCGTGCGGGCGAACGCCTCGCGGGCCGGCCTTTTTTCTTCTTGGCCCTCTCTTTGGGGGGGCCTCGTTCACTGTAAACAAATTGGAGTGCTCCACGCAGGTCGTTGGGACCTGGACAATTGTTATGGGATGATGAGATAGGGCTCGGGCACTATTTTGTCGGTTTGCATGCCTGGGTAATGGTGAATAGGAACAGTTGGGGATATTCGTATTTAGCGGTCAGAGGTGAAATTCTTGGATTCGGGAAAGACGAACAACTGCGAAGGCATTTATCAAAGATGTTT	Eukaryota;Stramenopiles;Sagenista;Labyrinthulomycetes;Thraustochytriales;Thraustochytriaceae;Thraustochytriaceae_X;Thraustochytriaceae_X_sp.;	0.866754	0	0	0	0	0	0	0	0	0	0	0	0	0	0	0	0	0	0	0	0	0	0	0	0	0	0	0	0	0	0	0	86	0	0	0	0	0	0	0	0	0	0	0	0	0	0
4f4a3cc01be8cdfb587092f02f1bd0bf	AGCTCCAATAGCGTATATTAAAGTTGTTGCAGTTAAAAAGCTCGTAGTTGAATTTCTGGTGGGGACGGCGGTCCGCCGCCTTTGTGTGGTGTGTACTTGCGTGTTCCCCGCCTTGCTTGTGGAGTGTGTTGCGGTCCTTAATTTGGGTTGTGGCATGTGTCTCTGCATCGATTACTGTGAACAAATTAGAGTGTTTAAAGCAGGCTTGTTAGCTTGAATACATTAGCATGGAATAATGATATAGGACTTTGGTGCTATTTCGTTGGTTGTGTACCAAGGTAATGATTAATAGGGATAGTTGGGGGTATTCATATTTGATTGTCAGAGGTGAAATTCTTGGATTTATTAAAGATGAACAACTGCGAAAGCATTTACCAAGGATGTTT	Eukaryota;Stramenopiles;Opalozoa;Bicoecea;Bicoecales;Bicoecaceae;Bicosoeca;Bicosoeca_vacillans;	1	0	0	0	0	0	0	0	0	0	0	0	0	0	0	0	0	0	0	0	0	0	0	0	0	0	0	0	0	10	0	0	0	0	0	0	0	0	0	0	0	0	0	0	0	0	0
4f5c953e54cf37193901a59c9664a5ac	AGCTCCAATAGCGTATATTAAAGTTGTTGCAGTTAAAAAGCTCGTAGTTGGATTTGTGGTCTCCCGCGTGGCCCTCTCTGAGGCGCTGTTGCGGGGGTCCATCCTTGGGCGGATGTCGCGTGGCATTCGGTTGTCGCGTGGGGGATGCCCATCGTTTACTGTGAAAAAATCAGCGCGTTCAAAGCAGGCTTATGCCGTTGAATGTATTAGCATGGAATAATGAGATAGGACCACGGTGCTATTTTGTTGGTTTGCGCACTGGGGTAATGATTAATAGGGACAGTTGGGGGTATTCGTATTGCATTGTCAGAGGTGAAATTCTTGGATTTCTGCAAGACGAACTACTGCGAAAGCATTTACCAAGGATGTTT	Eukaryota;Stramenopiles;Ochrophyta;Bacillariophyta;Bacillariophyta_X;Raphid-pennate;Cocconeis	0.999112	0	0	0	0	0	0	0	0	0	0	0	0	0	0	0	0	0	0	0	0	0	0	0	0	0	0	0	20	0	0	0	0	0	0	0	0	0	0	0	0	0	0	0	0	0	0
4f8fb11494c21a4caa858514850d749f	AGCTCCAATAGTGTATCTTAACGTTGTTGCAGTTAAAAAGCTCGTAGTTGAATTTCTTGTTGGGGGTCCTATGCACTTCGCTTGGACCCCCTCCAATCCGCTAGCGGAACACGGAGGGCTATTTGTTTAGCGGCCGTGGGAAGTAGCATTTTACTTTGAAGAAATTAGAGTGTTCCAGGCAGGCTTTGCTTGAATACATCAGCATGGAATAATGGAATAGGACATCTCCTATATCTTGGTGTATGGGAGTGTAATGATTAACAGGGACAGTTGGGGGCATTCGTACTCTTTTGTCAGAGGTGAAATTCATGGATTAGAAGAAGACGAACTAATGCGAAAGCATTTGCCAAGGATGTTT	Eukaryota;Alveolata;Ciliophora;Phyllopharyngea;Cyrtophoria_8;Dysteriidae;Microdysteria;Microdysteria_decora;	0.723108	0	0	0	0	0	0	0	0	0	0	0	0	0	0	0	0	0	0	0	0	0	0	0	0	0	0	0	0	0	0	0	0	12	0	0	0	0	0	0	0	0	0	0	0	0	0
4fea5d13a5a15791a08af5f0454dd02f	AGCTCCAATAGCGTATATTAAAGTTGTTGCAGTTAAAAAGCTCGTAGTTGGATTTCTGGTAGGAGCGACCATACCGGGCTTGATTGTCCGTGTAATGTGTTGTCTCCAGCCATCCTCGTGGAGAACGTTTCTGGCATTAATTTGTCGGATTCAGGACCCGCGTCTTTTACTGTGAAAAAATTAGAGTGTTTAAAGCAGGCAATTGGCTTGAATACATTAGCATGGAATAATAAGATAGGACTTTGGTGCTATTTTGTTGGTTTGCACATCAAGGTAATGATTAACAGAATCAGTCGGGGATATTCGTATGCAAATGTCAGAGGTGAAATTCTTGGATTTTTTACAGACGAACTACTGCGAAAGCATTTATCAAGGATGTTT	Eukaryota;Stramenopiles;Sagenista;Labyrinthulomycetes;Labyrinthulales;Labyrinthulaceae;Labyrinthulaceae_X;Labyrinthulaceae_X_sp.;	0.996116	0	0	0	0	0	0	0	0	0	0	0	0	0	0	0	0	0	0	0	0	0	0	0	0	0	0	0	0	0	0	0	0	69	0	0	0	0	0	0	0	0	0	0	58	0	0
4ffe9bfd0febcef52eb9c8b004dfa921	AGCTCCAATAGCGTATATTAAAGTTGTTGCAGTTAAAAAGCTCGTAGTTGAATTTCTGGACTCGCCGAGAGGCGGCCTTTGGCCGACCACTCCGCAAGTTCATCCTCGCCCTTCGGGGCGTCATTTACTGTGAAAAAATTAGAGTGTTTAAAGCAGGCTTTAGGCTTGAATACATTAGCATGGAATAATGAGATAGGACCAAGTCGTATTTTGTTGGTTGCGCGATTCGGTAATGATTAATAGGGACAGTTGGGGGTATTCATATTTAATTGTCAGAGGTGAAATTCTTAGATTTATTAAAGATGAACTACTGCGAAAGCATTTACCAAGGATGTTT	Eukaryota;Stramenopiles;Opalozoa;Bicoecea;Anoecales;Cafeteriaceae;Cafeteria;Cafeteria_roenbergensis;	0.990376	0	0	0	0	0	0	0	0	0	0	0	0	0	0	0	0	0	0	0	0	0	0	0	0	0	0	495	0	0	0	0	0	0	0	0	0	0	0	0	0	0	0	0	7	0	0
502f42c21bc383e3bd7211b7c88fba01	AGCTCCAATAGCGTATATTAAAGTTGTTGCAGTTAAAAAGCTCGTAGTTGGGTTTATGGCTTGCTCTATGGTCCATTTGTTTGATTCCGTTAGAGTAAGCCATCCTTGGGCAAAGCTTATGTGGCATTAGGTTGTCGTGTTAGGGATGCTCATCTTTTACTGTGAAAAAATCAGCGCGTTCAAAGCAGGCTTACGCCATTGAATGTATTAGCATGGAATAATAAGATAGGACCTGGGTACTATTTTGTTGGTTTGCGCACCTAGGTAATGATTAATAGGGATAGTTGGGGGTATTCGTATTCCATTGTCAGAGGTGAAATTCTTGGATTTCTGGAAGACGAACTACTGCGAAAGCATTTACCAAGGATGTTT	Eukaryota;Stramenopiles;Ochrophyta;Bacillariophyta;Bacillariophyta_X;Raphid-pennate	0.988186	0	0	0	0	0	0	0	0	0	0	0	0	0	0	0	0	0	0	0	0	0	0	0	0	0	0	0	0	0	0	0	0	6	0	0	0	0	0	0	0	0	0	0	0	0	0
5076a4ffbc609d5e955f510191dc69c7	AGCTCCAATAGCGTATATTAAAGTTGTTGCAGTTAAAAAGCTCGTAGTTGGATTTCTGGTGGGAGTGACCGTTCCGGACTTGATTGTCTGTGTATTGAGTTGTCTCCAGCCATCCTTGTGGAAAACTTTTCTTGCATTAATTTGTAGGGATTGGGACCCACATCGTTTACTGTGAAAAAATTAGAGTGTTTAAAGCAGGCAATCGCTTGAATACATTAGCATGGAATAATAAGATAGGACTTTGGTACTATTTTGTTGGTTTGCATACCAAATTAATGATCAACAGGAACAGTTTGAGGATATTCGTATGAACATGTCAGAGGTGAAATTCTTGGATTTTGATCAGACGAACTACTGCGAAAGCATTTATCAAGGATGTTT	Eukaryota;Stramenopiles;Sagenista;Labyrinthulomycetes	1	0	0	0	0	0	0	0	0	0	0	0	0	0	0	0	0	0	0	0	0	0	35	0	0	0	0	0	0	0	0	0	0	0	0	0	0	0	0	1145	53	0	0	0	0	0	0
50a97fbd79e569d76cb5f709ef75373e	AGCTCCAATAGCGTATGCTAAAGTTGTTGCAGTTAAAAGGCTCGTAGTCGAACTTCTGGCCCTGTGAACCTGGCCCAATCTCTAGTAGATTGCGTGCCGGTGTGCACGGGTCATTCTTCTGGAGAGCATTGCTGCCCTTGATTGGGTTGGTGATGTGATTCAGATCCTTTACTGTGAGAAAATCAACGTGTTCAAAGCAGGCTTTAATGCTTGTATGGTTCAGCATGGAATAATAAGATAAGACTTCGGTTTTGTTTTGTTGGCTATACGAACCAAAGTAATGATTGAAAGGGATAGTTGGGGGTGCTAGTATTCAGTGGTCAGCGGTGAAATGCGAGGACCCATTGAAGACTAACTTATGCGAAAGCATTCACCAAGGATATCT	Eukaryota;Rhizaria;Cercozoa;Endomyxa;Vampyrellida;Vampyrellida_X;Thalassomyxa;Thalassomyxa_sp.;	0.999991	0	0	0	0	0	0	0	0	0	0	0	0	0	0	0	0	0	0	0	0	0	0	0	0	0	0	0	0	0	0	0	7	0	0	0	0	0	0	0	0	0	0	0	0	0	0
50ad5e0158af39ef20f24d14f5027bd6	AGCTCCAATAGCGTATATTAAAGTTGTTGCAGTTAAAAAGCTCGTAGTTGGATTTGTGGCAGGTCTCGCGGCCCAATTTTGGTGCTAATGAGACCCGCCATCCTTGGGTGGAATCTGTGTGGCATTAGGTTGTCGTGCAGGGGATGCCCATCGTTTACTGTGAAAAAATTAGAGTGTTCAAAGCAGGCTTACGCCGTTGAATATATTAGCATGGAATAATAAGATAGGACCTTGGTACTATTTTGTTGGTTTGCGCACCAAGGTAATGATTAATAGGGACAGTTGGGGGTATTCGTATTCCATTGTCAGAGGTGAAATTCTTGGATTTTTGGAAGACGAACTACTGCGAAAGCATTTACCAAGGATGTTT	Eukaryota;Stramenopiles;Ochrophyta;Bacillariophyta;Bacillariophyta_X;Raphid-pennate	0.933741	0	0	0	0	0	0	0	0	0	0	0	0	0	0	0	0	0	0	0	0	0	0	0	0	0	0	0	0	0	0	0	0	0	0	0	0	0	0	0	0	0	0	0	0	0	0
50d7f3a75705d5d96c4ee8ffb316b951	AGCTCCAATAGCGTATATTAATGTTGTTGCAGTTAAAAAGCTCGTAGTTGAATTTAGGAGGGTTAACCTTCCTGTCTGCACTCCTCATGGCAACTGATATTGCTATGTGGAACAGACTTTTACTGTGAGAAAACTAAAGTGCTCAAAGCAGGCTAACGCTTGAATATTAAAGCATGGAATAATAAAATAGGACTTAATTCTATTATTGGTCATTGGATTAAGTAATGATTAACAGAAACAGTTGGGGGCATTCGTATTTAATTG	Eukaryota;Alveolata;Ciliophora;Phyllopharyngea;Suctoria;Ephelotidae;Ephelota;Ephelota_gigantea;	0.914996	0	0	0	0	0	0	0	0	0	0	0	0	0	0	0	0	0	0	0	0	0	0	0	0	0	0	0	0	0	0	0	0	0	0	0	0	2	0	0	0	0	0	0	0	0	0
50fc903f67853c95f8b0f308f3b0a9be	AGCTCCAATAGCGTATATTAAAGTTGTTGCAGTTAAAAAGCTCGTAGTTGGACTTCATGAAATGCAGATGGGATAACCATTTGCTTTCTACCAGTCATTGACTGTTACTGTGAGAAAATTAGAGTGTTTCAAGCAGGCTATTGCAGGAATACATTAGCATGGAATAACGAATGTATCTACAATTTGGTTGATTGTAGAATACGATTAATAGGGACAGTTGGGGGCATTAGTATTTAATTGTCAGAGGTGAAATTCTTGGATTTGTTAAAGACTAACGTATGCGAAAGCATTTGCCAAGGATGTTT	Eukaryota;Alveolata;Ciliophora;Litostomatea;Haptoria_5;Pleurostomatida;Pleurostomatida_X;Pleurostomatida_X_sp.;	0.831276	0	0	0	0	0	0	0	0	0	0	0	0	0	0	0	0	0	0	0	0	0	0	0	5	0	0	0	0	0	0	6	0	0	0	0	0	0	0	0	0	0	0	0	0	0	0
5121fedcf093306199c01cb0384a2fbd	AGCTCCAATAGCGTATATTAAAGTTGTTGCAGTTAAAAAGCTCGTAGTTGGATTTCGGAGGTCACGGACCGGCGGACCGCGAGGTCTGAACCGGTGGTGTGGCTTCTTCCTTCCAGGAAAGCAGTTTCCGCTTAACCGCGTGAGCTGTGTACTTGGATCGTTTACTTTGAGAAAATTATGGTGTTCAAAGCAGGCTTATGCCTTGAGTATATTAGCATGGAATAATGGAATAGGACATTGGACTTTATCCTATTTTGTTGGTTTCTAGGACCGATGTAATGATTAATAGGGATAGTTGGGGGCATTAATATTTAATTGTCAGAGGTGAAATTCTTGGATTTATGAAAGATTAACTTCTGCGAAAGCATTTGCCAAGGATGTTT	Eukaryota;Apusozoa;Mantamonadidea;Mantamonadida;Mantamonadida_X;Mantamonadida_XX;Apusozoa_;Apusozoa_sp.;	1	0	0	0	0	0	0	0	0	0	0	0	0	0	0	0	0	0	0	0	0	0	0	0	0	0	0	0	0	0	0	0	0	0	0	0	0	0	0	0	0	0	0	0	9	0	0
512532f277e5010fc611dbbea671f810	AGCTCCAATAGCGTATATTAAAGTTGTTGCAGTTAAAAAGCCCGTAGTTGGATGTCTGCTCGGTTATGCCAGTCGGCCCTCAGGGTCTGTACTTGGTGATTTCCGGGCATTTACTAAGGAACACGACTGCACTTGATTGTGTGGCGTGCGACTTAGTTCCGTTACTTTGAGAAAATTAGAGTGTTTCAAGCAGGCCTACGCCTTGAATACTGCAGCATGGAATAATATTTTAAGGCTTTGTTCTTATTTATTGGTTTTAAAGACCAAAGCAAGGATTAATAGGGACGGTTGGGGGCGTTCGTATTTGATTGTCAGAGGTGAAATTCTTGGATTTATCAAAGACGAACAACTGCGAAAGCATTCGCCAAAGATGTTT	Eukaryota;Alveolata;Apicomplexa;Colpodellidea;Colpodellida;Chromeraceae;Chromera;Chromera_sp.;	1	0	0	0	0	0	0	0	0	0	0	0	0	0	0	0	0	0	0	0	0	0	4	0	0	0	0	0	0	0	0	0	0	0	0	0	0	0	0	0	0	0	0	0	0	0	0
515a77fe069f6d1c2de7698cad733cc5	AGCTCCAATAGCGTATATTAAAGTTGTTGCAGTTAAAAAGCTCGTAGTTGGATTTGTGGCGTTCGCGTGCGGCCGGGCATTCGTGCCTGTGCTTGCTAGCGTCGCCATCCTTGGGTGGAACCAGTGTGGCATTAAGTTGTCGTGCTGGGGATGCCCATCGTTTACTGTGAAAAAATTAGAGTGTTCAAAGCAGGCTTATGCCGTTGAATATATTAGCATGGAATAATAAGATAGGACCTTGGTACTATTTTGTTGGTTTGCGCACCAAGGTAATGATTAATAGGGACAGTTGGGGGTATTCGTATTCCATTGTCAGAGGTGAAATTCTTGGATTTTTGGAAGACGAACTACTGCGAAAGCATTTACCAAGGATGTTT	Eukaryota;Stramenopiles;Ochrophyta;Bacillariophyta;Bacillariophyta_X;Raphid-pennate;Nitzschia;Nitzschia_draveillensis;	0.852164	0	0	0	0	0	0	0	0	0	0	0	0	0	0	0	0	0	0	0	0	0	0	0	0	0	0	0	117	0	0	0	0	0	0	0	0	0	0	0	0	0	0	0	0	0	0
5165ed04952b63890792baabc01cd030	AGCTCCAAAAGCGTATATTAATGTTGTTGCAGTTAAAAAGCTCGTAGTTGGATTTGTGGTCTTGGTCGTTTGGTCCGACACTTTAGTGTGGGTACCTGAACGACTGGATCATCCTTGGGTGGAATCTGTGTGGCATTAAGTTGTCGTGCAGGGGATGCCCATCGTTTACTGTGAAAAAATTAGAGTGTTCAAAGCAGGCTTATGCCGTTGAATATATTAGCATGGAATAATGAGATAGGACCTCGGTACTATTTTGTTGGTTTGCGCACTGAGGTAATGATTAATAGGGACAGTTGGGGGTATTCGTATTCCATTGTCAGAGGTGAAATTCTTGGATTTCTGGAAGACGAACGACTGCGAAAGCATTTACCAAGGATGTTT	Eukaryota;Stramenopiles;Ochrophyta;Bacillariophyta;Bacillariophyta_X;Araphid-pennate	0.704594	0	0	0	0	0	0	0	0	0	0	0	0	0	0	0	0	0	0	0	0	0	0	0	0	0	0	0	1724	0	0	0	0	0	0	0	0	0	0	0	0	0	0	0	0	0	0
51814d60f016e94a96b04f95cc1a789a	AGCTCCAATAGCGTATATTAAAGTTGTTGCAGTTAAAAAGCTCGTAGTTGGATTTCTGGTGTCTTTTTGCGTTTCCTTCTTTGCCAGCGAAATGCTGGTGTTGGTCGCAATGGATGCCTTCTTTCTCCGCTAATTTGTCGCTGAATCATTAGTTTGGCTCGGTGATGAATGGGGATCATTTACTGTGAAAAAATTAGAGTGTTCAAAGCAAGTATTATTTCTTGAATACATTAGCATGGAATAATAAGATAGGACTTGGGTAATATTTTGTTGGTTTGCATATCCAGGTAATGATTAATAGGAACATATTGGGGATATCTGTATTTTTTAGTCAGAGGTGAAATTCTTGGATTTAAGAAAGACAAACTACAGCGAAAGCATTTATCAAGGATGTTT	Eukaryota;Stramenopiles;Sagenista;Labyrinthulomycetes;Labyrinthulales;Labyrinthulaceae;Labyrinthulaceae_X;Labyrinthulaceae_X_sp.;	0.999997	0	8	0	0	16	15	0	30	0	0	12	124	32	42	40	29	0	13	3	5	0	0	0	0	0	0	0	0	0	0	0	0	31	0	0	0	0	0	0	0	0	0	0	66	0	0
51b03d268859e4767413ad2e04485635	AGCTCCAATAGCGTATATTAAAGTTGTTGCAGTTAAAAAGCTCGTAGTTGAAATTCTGTGGGTCACGCTTGTTGGCGTTAGTCGCAAGTGGGGCACACATCCGCTTGAGAACTATACTCGTCCTTCGCTGGTCGGTATGGGGATCAGGCCTTTTACTGTGAAAAAATTAGAGTGTTCATAGCAGGCAATTGCCCTGAATACACAAGCATGGAATAATGGAAAATGACTTTGATCTATTTTATTGGTTATTAGATCTTAGTAATGATTAATAGGGACAGTTGGGGGCATTAGTATTTAATTGTCAGAGGTGGAATTCTTGGATTTATTAAAGACTAACTTATGCGAAAGCATTTGCCAAGGATGTTT	Eukaryota;Alveolata;Ciliophora	0.998404	0	0	0	0	0	0	0	0	0	0	0	0	0	0	0	0	0	0	0	0	0	0	0	0	0	0	0	0	0	0	0	0	0	0	0	0	0	0	0	0	0	0	0	0	0	0
51e9b970333b8495364ca9d743bbc44f	AGCTCCAATAGCGTATATTAAAGTTGTTGCAGTTAAAAAGCTCGTAGTTGGATTTCTGGCGGTATGGACCATCCGTTAATTGATTTTAATTGTGATGTGTTTTCTACTGCCATCCTCGTGGATAGCTACTTTGGCATTAATTTGTTAGGGTATGTGAGCCACGTCATTTACTGTGAAAAAATTAGAGTGTTTAAAGCAGGCAATTGGCTTGAATACATTAGCATGGAATAATAAGATAGGACTTTGGTGCTATTTTGTTGGTTTGCACATCAAGGTAATGATTAACAGAATCAGTCGGGGATATTCGTATGCAAATGTCAGAGGTGAAATTCTTGGATTTTTTACAGACGAACTACTGCGAAAGCATTTATCAAGGATGTTT	Eukaryota;Stramenopiles;Sagenista;Labyrinthulomycetes;Labyrinthulales;Labyrinthulaceae;Labyrinthulaceae_X;Labyrinthulaceae_X_sp.;	0.999004	0	3	0	0	0	0	0	0	0	0	0	0	0	0	0	0	0	0	0	0	0	0	0	0	0	0	0	0	0	0	0	0	0	0	0	0	0	0	0	0	0	0	0	0	0	0
52224d9055d1d8b0d0bee0bcef8f6f71	AACTCCAAGAGTGTATCTTAATGTTGCTGCAGTTAAAAAGCTCGTAGTTGAACTTCTGGCTGTTGAGTCCGCAAATGCGTGGACTCGGCAGTCATCCGCTAGGAGAAGTAGTATTTCTGTCAAAGGTTTTACTACGGACCCAGCATTTTACTTTGAAGAAATTAGAGTGTTCCTGGCAGGCTAAGCTTGCATATATTAGCATGGAATAATGGAATAGGACCTTTTCTGTTTTATTGGTTGACAGATAGGTAATGATTAACAGGGACAGTCGGGGGCATTCGTACTCAGTGGCTAGAGGTGAAATTCTTAGATTCGCTGAAGACGAACTAATGCGAAAGCATTTGCCAAGGATGTTT	Eukaryota;Alveolata;Ciliophora;Phyllopharyngea;Cyrtophoria_4;Chilodonellidae;Pseudochilodonopsis;Pseudochilodonopsis_fluviatilis;	0.995103	0	0	0	0	0	0	0	0	0	0	0	8	0	0	0	0	0	0	0	0	0	0	0	0	0	0	0	0	0	0	0	0	0	0	0	0	0	0	0	0	0	0	0	0	0	0
522c14f235324f55d0b844d3af6903d6	AGCTCCAATAGTGTATATTAACGTTGCTGCAGTTAAAAAGCTCGTAGTTGAATTTCTGGGGGGCCGCCTCGCCTCAGGGCGTGCGTGGCCACCTCATCCGCGTCGGAAGTGACTATAGCATCGCTTAGTTACGGATGCGCGTTTTACTTTGAAGAAATTAGAGTGTTCCAGGCAGGCTTTGCTTGAATACATCAGCATGGAATAATGGAATAGGACAGATCGATTTTATTGGTTATTCGATTTGTAATGATTAACAGGGACAGTTGGGGGCGTTTGTATTCAATAGTCAGAGGTGAAATTCTTGGATTTGTTGAAGACAAACTAATGCGAAGGCATTCGCCAAGGATGTTT	Eukaryota;Alveolata;Ciliophora;Phyllopharyngea;Cyrtophoria_8;Dysteriidae;Trochilia	0.998045	0	0	0	0	0	0	0	0	0	0	0	0	0	0	0	0	0	0	0	0	0	0	0	0	0	0	0	0	0	0	0	0	0	0	0	0	0	0	0	0	0	0	0	0	0	0
5230201342a536f342607dc48db801bd	AGCTCCAATAGCGTATATTAAAGTTGTTGCAGTTAAAAAGCTCGTAGTTGAACTTCTGCTGCATGCCCGATTCTGGCTCTCCGTCAAGTCGCGGTGTGCGCATCCGCTTGCAAGCCCAGACGCGGCCTTCACTGCGCCGACTGGTGTCGAGTAAGCATTTTACTTTGAAAAAATTAGAGTGTTTCAAGCAGGCAATGGCTCGAATACATTAGCATGGAATAATAGAATAGGACTTGTGTCCATCTGGTTGGTTCGTGGACGTGAGTAATGATTAACAGGGACAGTAGGGGGCATTAGTACTTAATTGTCAGAGGTGAAATTCTTGGATTTATTAAAGACTAACTTATGCGAAAGCATTTGCCAAGGATGTTT	Eukaryota;Alveolata;Ciliophora;Oligohymenophorea;Scuticociliatia_1;Philasterida	0.895062	0	0	0	0	0	0	0	0	0	0	0	0	0	0	0	0	0	0	0	0	0	0	0	0	0	0	0	0	0	0	0	0	0	0	0	0	0	0	0	0	0	0	0	0	0	8
524b78aab224e84b9a9dc058c5983226	AGCTCCAATAGCGTATATTAAAGTTGTTGCAGTTAAAAAGCTCGTAGTTGGATTTCAAGGAACGCATCTGGGAAACCAGTTTGCTTCCTACCAGTCTTAGACTGTTACTGTGAGAAAATTAGAGTGTTTCAAGCAGGCAATTGCAGGAATACATTAGCATGGAATAACGAATGTGTCTACAATTTGGTTGATTGTAGGTTACAATTAATAGGGACAGTTGGGGGCATTAGTATTTAATTGTCAGAGGTGAAATTCTTGGATTTGTTAAAGACTAACGTATGCGAAAGCATTTGTCAAGGATGTTT	Eukaryota;Alveolata;Ciliophora;Litostomatea;Haptoria_5;Pleurostomatida;Pleurostomatida_X;Pleurostomatida_X_sp.;	0.839256	0	0	0	0	0	0	0	0	0	0	0	0	0	0	0	0	0	0	0	0	0	0	0	0	0	0	0	0	0	0	0	0	0	0	0	0	0	0	0	0	0	0	0	0	0	0
52736943236c4414aab2152108d15dff	AGCTCCAATAGCGTATATTAAAGTTGTTGCAGTTAAAAAGCTCGTAGTTGGATTTCTGGTAGAGGGCTAGAGCGCACTTGTGTGAGGCTCGCGTCTTCTGCCATCCTTCTGTTAACTATTCATGACATTGATTTGTCGGTTTAGGGCTCAGATATTTTACCTTGAGAAAATTAGAGTGTTTCAGGCAGGCTTGTGCCCGGATACATTAGCATGGAATAATGGAATAGGACTTTAGCCTCTTCTGTTGGTCTGAGGGGTTGAAGTAATGATTAATAGGGATAGTTGGGGGCATTAGTACTTAACTGTCAGAGGTGAAATTCTCGGATTTGTTAAAGACTAACTTATGCGAAAGCATTTGCCAAGGATGTTT	Eukaryota;Alveolata;Ciliophora;Spirotrichea;Tintinnida	0.999991	0	0	0	0	0	0	0	0	0	0	0	0	0	0	0	0	0	0	0	0	0	0	0	0	0	0	0	0	0	0	0	0	0	0	0	0	0	0	0	0	0	0	0	0	0	0
528009a777ae10ba958572c19b307990	AGCTCCAATAGCGTATATTAATGCTGTTGCGGTTAAAAAGCTCGTAGTTGGATTTTGGGGCTCTCCCTTTTTTGGGAATTCATTTGGAGGCTGGTCCGGTGTAAACCGCGTACCGGCCGCCGGGCCCTTTCGTCTGGAGGCCGGGCGCATCGACTTGATTGTCGTGCGATTCCCCCGGTGTCTAGGACAATTACTTTGAACAAATTAGAGTGTTTAAAGCAGGCATTTTCGCCTTGAATACATTAGCATGGAATAACCACTTAGGACTTTGGTTCTATTTTGTTGGTTTTAAGAACTGAAGTAATGATTAACAGGAACCGTTGGGGCCATTAGTATTTAGTTGCCAGAGGTGAAATTCTTAGACTTACGAAAGACTAACTTCTGCGAAAGCACTTGGCA…	Eukaryota;Apusozoa;Apusomonadidae;Apusomonadidae_Group-1;Apusomonadidae_Group-1_X;Apusomonadidae_Group-1_XX;Amastigomonas;Amastigomonas_sp.;	0.990437	0	0	0	0	0	0	0	0	0	0	0	0	0	0	0	0	0	0	0	0	0	0	0	0	0	0	0	0	0	0	0	0	9	0	0	0	0	0	0	0	0	0	0	0	0	0
52a023ec709bf92134a2ea834f539cb0	AGCTCCAATAGCGTATATTAAAGTTGTTGCAGTTAAAAAGCTCGTAGTTGAACCTTGGGCCTGGCTGGCCGGTCCGCCTCACCGCGTGTACTGGTCCGGCCGGGCCTTTCCTTCTGGAGAACCGCATGCCCTTCACTGGGTGTGTCGGGGAACCAGGACTTTTACTTTGAGAAAATTAGAGTGTTCAAAGCAGGCCTTTGCTCGAATACGTTAGCATGGAATAATAGAATAGGACGTGCGGTCCTATTTTGTTGGTTTCTAGAACCGCCGTAATGATTAATAGGGATAGTCGGGGGCGTCAGTATTCAATTGTCAGAGGTGAAATTCTTGGATCTATTGAAGACTAACTACTGCGAAAGCATTCGCCAAGGATGTTT	Eukaryota;Opisthokonta;Fungi;Ascomycota;Pezizomycotina;Dothideomycetes;Roussoella	0.822484	0	0	0	0	0	0	0	0	0	0	0	44	0	0	0	0	0	0	0	0	0	0	0	0	0	0	0	0	0	0	0	0	0	0	0	0	0	0	0	0	0	0	0	0	0	0
52a9d7d1e2c5706c13f7798e90e7f4a4	AGCTCCAATAGCGTATATTAAAGTTGTTGCAGTTAAAAAGCTCGTAGTTGAACTTCTGTACGTGTTCTGTTCTGGCTCCGGTCAAGCAGTTACGCGTGCATCCGCTTGCAAACTAGTCTCGTCCTTAACTGGTCGTTCTAGGGAGTAAGCCCTTTACTTTGAAAAAATTAGAGTGTTTCAGGCAGGCAATGGCTCGAATACATTAGCATGGAATAATGGAATAGGACTTTTGTCCATTTGGTTGGTTATTGGACATAAGTAATGATTAACAGGGACAGTTGGGGGCATTAGTATTTAATTGTCAGAGGTGAAATTCTTGGATTTATTAAAGACTAACTTATGCGAAAGCATTTGCCAAGGATGTTT	Eukaryota;Alveolata;Ciliophora;Oligohymenophorea;Scuticociliatia_1;Cohnilembidae;Cohnilembus;Cohnilembus_sp.;	0.912309	0	0	0	0	0	0	0	0	0	0	0	0	0	0	0	0	0	0	0	0	0	0	0	0	0	0	53	0	0	0	0	0	0	0	0	0	0	0	0	0	0	0	0	0	0	0
52c1860136fecd1cefac0f5c1bde2917	AGCTCCAATAGCGTATATTAAAGTTGTTGCAGTTAAAAAGCTCGTAGTTGGATTTCTGAATGGATACCGATGCCCGCCTGCTGGCGTGTGCAAAGGTGCCCGTTCATCCTTCTGTTAAGGTTTCTTAGTATTCATTTACTGGTTTCCGGCTCAGATATTTTACCTTGAATAAATTAGAGTGTTTCAGGCAGGCTTGGTCTTGAATACATTAGCATGGAATAATAGAATAGGACTCTAGATCCTTTGTTGGTTTCTGGATTTGGAGTAATGATTAATAGGGATAGTTGGGGGCATTAGTATTTAATTGTCAGAGGTGAAATTCTTGGACCGTCTGAAGACTAACTACTGCGAAAGCATTTGCCAAGAATGTTT	Eukaryota;Alveolata;Ciliophora;Spirotrichea;Euplotia;Uronychiidae	0.99996	0	0	0	0	0	0	0	0	0	0	0	0	0	0	0	0	0	0	0	0	0	0	0	0	0	0	0	0	0	0	0	0	0	0	6	0	0	0	0	0	0	0	0	0	0	0
52e5335b38f78240ab5f409d5f1af680	AGCTCCAATAGCGTATATTAAAGTTGTTGCAGTTAAAAAGCTCGTAGTTGAATTTCTGTATAATCCCGGCTTCGGCTCCTGTCGAACCGTGGATTGTACATCCGCTTACAAACTTAGCCCGGTCTTCATTGGTCGACTAAGGGAGTAGGCCCTTTACTTTGAAAAAATTAGGGTGTTTCAAGCAGGCATTGGCTCGAATACATTAGCATGGAATAATGGAATAGGACTAGTGTCCATTTGGTTGGTTATTGGACGTTAGTAATGATTAACAGGGACAGTTGGGGGCATTAGTACTTAACAGTCAGAGGTGAAATTCTTGGATTTGTTAAAGACTAACTTATGCGAAAGCATTTGCCAAGGATGTTT	Eukaryota;Alveolata;Ciliophora;Oligohymenophorea;Scuticociliatia_1;Philasterida;Paranophrys;Paranophrys_magna;	0.999824	0	0	0	0	0	0	0	0	0	0	0	0	0	0	0	0	0	0	0	0	0	0	0	0	0	0	0	0	0	0	0	0	0	0	0	0	0	0	0	0	0	0	0	0	0	76
52ea7dfbe364540e05e8d779d54830d1	AGCTCCAATAGCGTATATTAAAGCTGTTGCGGTTAAAAAGCTCGTAGTTGGATTTCTGTCAAGGACAACTGGTCCGCCCTCCGGGTGAGCACATAGTTTGGTCTTGACATCTTGCTGGAAGCTGTTGCTGCACTTGGCTGTGTGGCGCAGTGTTCAGCACTTTCACTTTGAGGAAATTGGAGTGTTTCAAGCAGGCACATGCCTTTGGACACAGTAGCATGGAATAATTAGATTGGGCTTTTGCTCCAATTTGTCGGTTTCTGGAGCTGAGGTGAGTATTAATGGGGATTGTTGGGGGCATCCGAATTTAGCCGTCAGAGGTGAAATTCTTGGATCTGCTAAAGACGGACAACTGCGAAAGCGTTTGCCCAGGATGTTT	Eukaryota;Alveolata;Dinoflagellata;Dinophyceae;Gymnodiniales;Gymnodiniaceae;Amphidinium;Amphidinium_massartii;	0.999691	0	0	0	0	0	0	0	0	0	0	0	0	0	0	0	0	0	0	0	0	0	0	0	0	35	0	0	0	79	0	0	0	0	0	7	40	0	0	0	0	0	0	0	0	0	0
52fea737a770aecd23736655e4bf0ed8	AGCTCCAATAGCGTATATTTAAGTTGCTGCAGTTAAAAAGCTCGTAGTTGGATTTCGGGTGGGAATGGCCGGTCCGCCGTTTCGGTGTGCACTTGCTACGCCCACCTTGCTGCCGGGGACGTGCTCTTGAGTTCACGCTCGGGACACGGAGTCGGCGAGGTTACTTTGAGTAAATTAGAGTGTTCAAAGCAGGCCTACGCTCTGAATACATTAGCATGGAATAACACGATAGGACTCTGGCCTATCTTGTTGGTCTGTAGGACCGGAGTAATGATTAAGAGGGACAGTCGGGGGCATTCGTATTTCATTGTCAGAGGTGAAATTCTTGGATTTATGAAAGACGAACTACTGCGAAAGCATTTGCCAAGGATGTTT	Eukaryota;Archaeplastida;Chlorophyta;Trebouxiophyceae;Chlorellales;Chlorellales_X;Picochlorum;Picochlorum_sp.;	0.920381	0	0	0	0	0	0	0	0	0	0	0	0	0	0	0	0	0	0	0	0	0	0	0	0	0	0	0	0	0	0	0	0	0	0	0	0	0	0	0	0	0	0	0	0	0	0
53194e7fdedae6d52d37fcdccfad57e2	AGCTCCAATAGCGTATATTAAAGTTGTTGCAGTTAAAAAGCTCGTAGTTGGATTTCTGGGAGAGTGCCGATGTCGGCCGCGCGCTTGTGCAGAGGCGCTCTTCCATCCTTCTGTTAACGTCTCTTGGCATTCATTTGCTGGTTTCGGGCTCAGATATTTTACCTTGAGAAAATTAGAGTGTTTCAGGCAGGCTTGCGCCGGAATACATTAGCATGGAATAATAGAATAGGACTTTTGTCTCTTTTGTTGGTTTGAGGGACTGAAGTAATGATTAATAGGGATAGTTGGGGGCATTAGTATTTAATTGTCAGAGGTGAAATTCTCGGATTTGTTAAAGACTAACCTATGCGAAAGCATTTGCCAAGGATGTTT	Eukaryota;Alveolata;Ciliophora;Spirotrichea;Hypotrichia;Oxytrichidae;Hemigastrostyla;Hemigastrostyla_enigmatica;	0.999987	15	0	0	0	0	0	0	0	0	0	0	0	0	0	0	0	0	0	0	0	0	0	0	0	0	0	0	0	0	0	0	0	0	0	0	0	0	0	0	0	0	0	0	0	0	0
533fc4bbbc98d8bbafd8e8bee232683e	AGCTCCAATAGCGTATATTAAAGTTGTTGCAGTTAAAAAGCTCGTAGTTGAATTTCGGATCGCCACTCCCGCCACTTCATTGTGGCGATGTGGAGTTCCTCCTCGCCTTTGGCGTCATTTACTGTGAAAAAATTAGAGTGTTCAAAGCAGGCAATCGCTTGAATACATTAGCATGGAATAATAAGATAGGATCTTCGTCTATTTTGTTGGTTGCGGACTGAGATAATGATTAATAGGGATAGTTGGGGGTGTCTGTATTGTGTTGTCAGAGGTGAAATTCTTAGATTTACACAAGACAAACTACTGCGAAAGCATTCACCAAGGATGTTT	Eukaryota;Stramenopiles;Opalozoa;Bicoecea;Anoecales;Caecitellaceae;Caecitellus;Caecitellus_pseudoparvulus;	0.99938	0	0	0	35	0	40	0	0	0	14	338	1474	0	0	0	0	0	0	0	0	0	3839	1282	19	0	0	10	19	0	0	0	0	0	0	15	26	10	20	64	313	9	0	0	62	0	30
535cdcfa126f525566d54035db481c36	AGCTCCAATAGCGTATATTAAAGTTGTTGCAGTTAAAAAGCTCGTAGTTGGATTTGTGGCTTGTGCCGAGGCGTCCATTTGTTTGGTTCTGCCTTGGCCGTGCCATCCTTGGGTGGAATCTGTGTGGCATTAGGTTGTCGTGCAGGGGATGCCCATCGTTTACTGTGAAAAAATTAGAGTGTTCAAAGCAGGCTTATGCCGTTGAATATATTAGCATGGAATAATAAGATAGGTCTTGGGTCCTATTTTGTTGGTTTGCGGGCCTTGGAAATGATTAATAGGGACAGTTGGGGGTATTCGTATTCCATTGTCAGAGGTGAAATTCTTGGATTTCTGGAAGACGAACTACTGCGAAAGCATTTACCAAGGATGTTT	Eukaryota;Stramenopiles;Ochrophyta;Bacillariophyta;Bacillariophyta_X;Raphid-pennate;Fistulifera;Fistulifera_saprophila;	0.774254	1	0	20	21	0	20	0	0	0	18	0	15	0	0	0	0	0	1	1	2	0	0	0	0	0	0	0	0	0	0	0	0	0	0	0	0	0	0	0	0	0	0	0	0	0	0
535d8478cfaaea545a1c375d69d91479	AGCTCCAATAGCGTATATTAAAGTTGTTGCAGTTAAAAAGCTCGTAGTTGAATTTCTGGTCCGGGTGCCGGTCGGCCGTTGAGGCTCGCACTTGGTTTTTTAACCCGGATCATCCTTGCGGGGAAGTCGCCTGGCCTTCACTGGTTCGGGCGGTCGGACCCGCATCGATTACTGTGAACAAATTAGAGTGTTTAAAGCAGGCGTTTGCTTGAATACATTAGCATGGAATAATGATATAGGACTTTGGTGCTATTTCGTTGGTTGCGTACCGAAGTAATGATTAATAGGGATAGTTGGGGGTATTCATATTTGATTGTCAGAGGTGAAATTCTTGGATTTATTAAAGATGAACAACTGCGAAAGCATTTACCAAGGATGTTT	Eukaryota;Stramenopiles;Opalozoa;Bicoecea;Bicoecales;Bicoecaceae	0.997142	0	0	0	0	0	0	0	0	0	0	0	0	0	0	0	0	0	0	0	0	0	0	0	0	0	0	0	0	0	0	0	0	0	0	0	0	0	0	0	0	0	0	0	0	0	0
535fda6930a9ea86d7effe3e6e58ac53	AGCTCCAATAGCGTATATTAAAGTTGTTGCAGTTAAAAAGCTCGTAGTTGAAGCCTCGGGCGGCGGCACTGAGCAGAAGCTCCGGTGCCCTCGCCCGTTTCTCGCAAAGAGGCCCTGCCCCATTAACTTGGGGCTTGGTTGAGTTGCGTCCTTTACTGTGAACAAATTAGGGTGTTTAAAGCAGGCCTACGTTTGAATACACTAGCATGGAATAATAAGATATGATCTTGGTCGTATTTTGTTGGTGACCGCCAAGGTAATGATTGAAAGAAACAGTTGTGGGTATTCGTATGAGCATGTCAGAGGTGAAATTCTTGGATTTTGATCAGACGAACGACTGCGAAAGCATTTACCAAGGATGTTT	Eukaryota;Stramenopiles;Sagenista;Labyrinthulomycetes;Labyrinthulales;Labyrinthulaceae;Labyrinthula;Labyrinthula_sp.;	0.982528	0	0	0	20	0	0	0	0	0	0	0	0	0	0	0	0	0	0	0	0	25	19	17	38	17	25	23	149	39	20	30	16	29	51	22	35	28	24	45	57	22	50	18	28	42	53
537ff74bb6dfe9d05c2711e6d6f40661	AGCTCCAATAGCGTATATTAATGTTGTTGCAGTTAAAAAGCTCGTAGTTGGATTTGTGGTTGGAGCGTTCGGTCCGACACAGTGTGTGGGTACTTGATCGTTCCGTCCATCTTTGGTTTGAATCTTCGTGGCATTAAGTTGTCGTGGAGGGGAGGGCCATCATTTACTGTGAAAAAATCAGAGTGTTCAAAGCAGGCTTATGCCGTTGAATATATTAGCATGGAATAATGAGATAGGACCTCGGTACTATTTTGTTGGTTTGCGCACCGAGGTAATGATTAATAGGGACAGTTGGGGGTATTCGTATTCCATTGTCAGAGGTGAAATTCTTGGATTTCTGGAAGACGAACTACTGCGAAAGCATTTACCAAGGATGTTT	Eukaryota;Stramenopiles;Ochrophyta;Bacillariophyta;Bacillariophyta_X;Araphid-pennate;Licmophora;Licmophora_gracilis;	0.998825	0	0	0	0	0	0	0	0	0	0	0	0	0	0	0	0	0	0	0	0	0	0	0	0	0	0	0	0	0	0	0	0	0	0	0	0	0	0	0	0	0	0	0	0	0	0
53d3d3a1579d9ab3eba071c19096af9a	AGCTCCAATAGCGTATATTAAAGTTGTTGCAGTTAAAAAGCTCGTAGTTGGATTTGTGGTGTGTCCTGTCGGTCCGTGGGCTCAGCCTGCGTGTCTGTACGGGTCCGCCTTTCATGGGACTGTTGGCTTTGTGGCATTAGGTTGTCGCATTGTTGATGCCCATCTTTTACTGTGAAAAAATTAGAGTGTTCAAAGCAGGCTTATGCCGTTGAATATATTAGCATGGAATAATGAGATAGGACCTTGGTACTATTTTGTTGGTTTGCGCACCGAGGTAATGATTAATAGGGACAGTTGGGGGTATTCGTATTCCATTGTCAGAGGTGAAATTCTTGGATTTTTGGAAGACGAACTACTGCGAAAGCATTTACCAAGGATGTTT	Eukaryota;Stramenopiles;Ochrophyta;Bacillariophyta;Bacillariophyta_X;Raphid-pennate	0.977547	4	0	0	0	0	0	0	0	0	0	0	0	0	0	0	0	0	0	0	0	0	0	0	0	0	0	0	0	0	0	0	0	0	0	0	0	0	0	0	0	0	0	0	0	0	0
5427c1e871188151cf1800f83346851f	AGCTCCAATAGCGTATATTAAAGTTGTTGCAGTTAAAAAGCTCGTAGTTGAAATTCAGTGAACTTACAACCTAAGGTTGTAAGCCACAATTTCATGACTTCAAATGAGTGTATTAATTTACGCTCATTCTGAATCATGTCGTTTACTGTGAACAAATTAGGGTGTTTAAAGCAGGCTCCTGTTTGAATACATTAGCATGGAATAATAAGATACGACTTTAGTTGAATCTTGTTGGTGTCTTCTAAAGTAATGATTGAAAGAAACAATTGTGGGTATTCGTATGAGCATGTCAGAGGTGAAATTCTTGGATTTTGGTCAGACGAACTACTGCGAAAGCATTTACCAAGGATGTTT	Eukaryota;Stramenopiles;Sagenista;Labyrinthulomycetes;Labyrinthulales;Labyrinthulaceae	0.714083	0	0	0	0	0	0	0	0	0	0	0	0	0	0	0	0	0	0	0	0	0	0	0	0	0	0	0	0	13	0	0	0	0	0	0	0	0	0	0	0	0	0	0	0	0	0
[truncated: 1,273 more rows]
[truncated: 8 more columns]
